# Supplementary material
Source: PubMed Central journal article supplement (PMC7446891)
Supplement: NIHMS1618913-supplement-1.pdf [file NIHMS1618913-supplement-1.pdf]

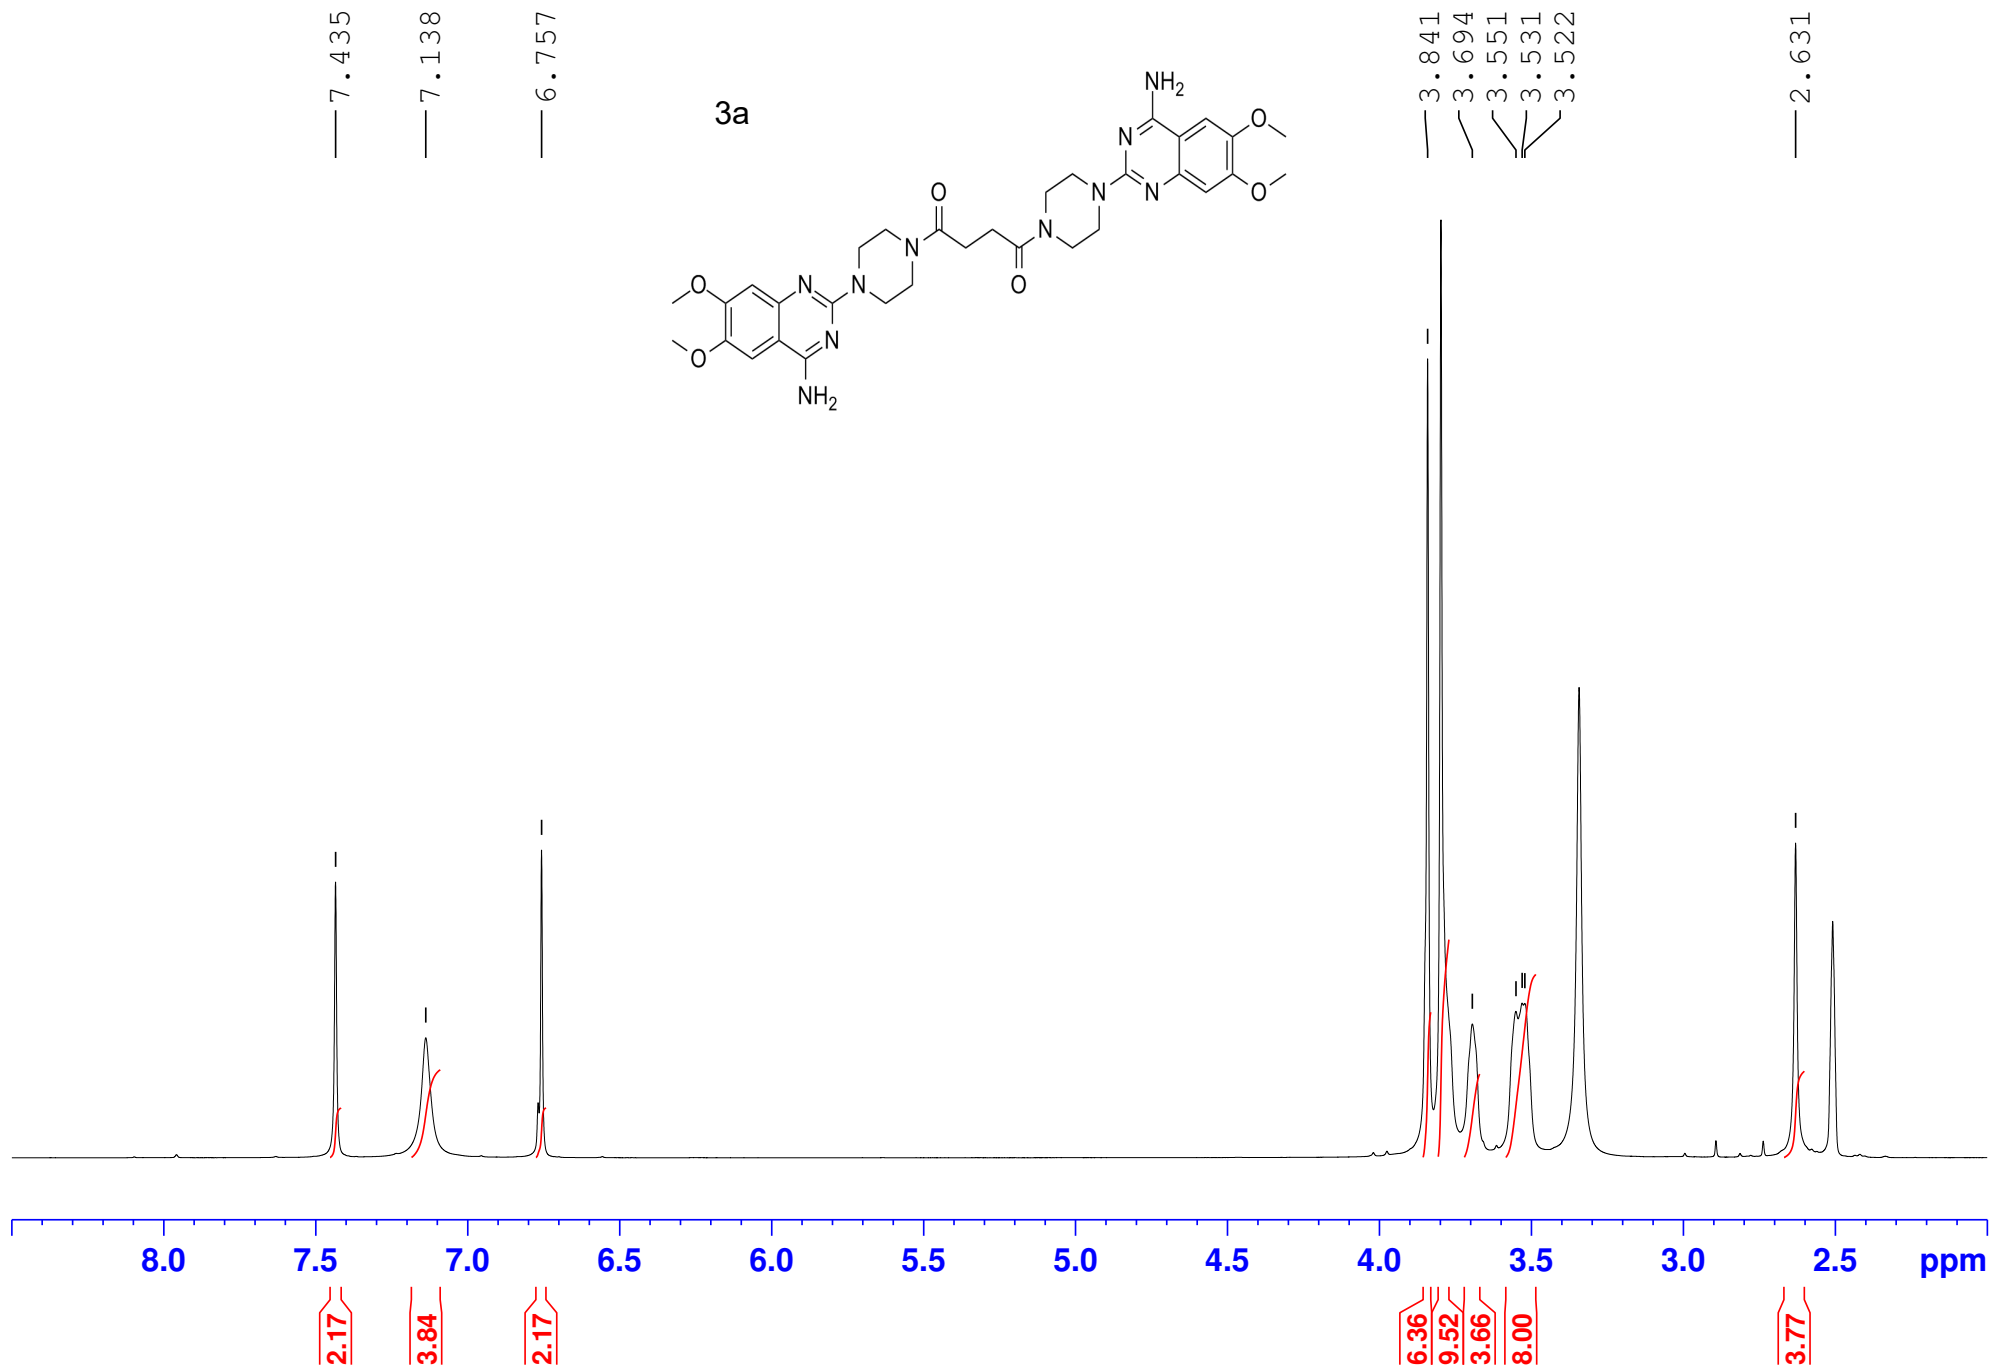

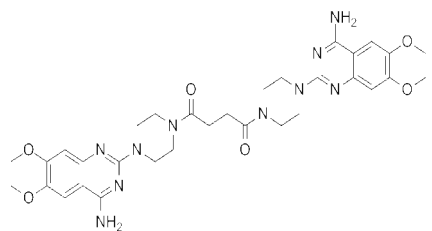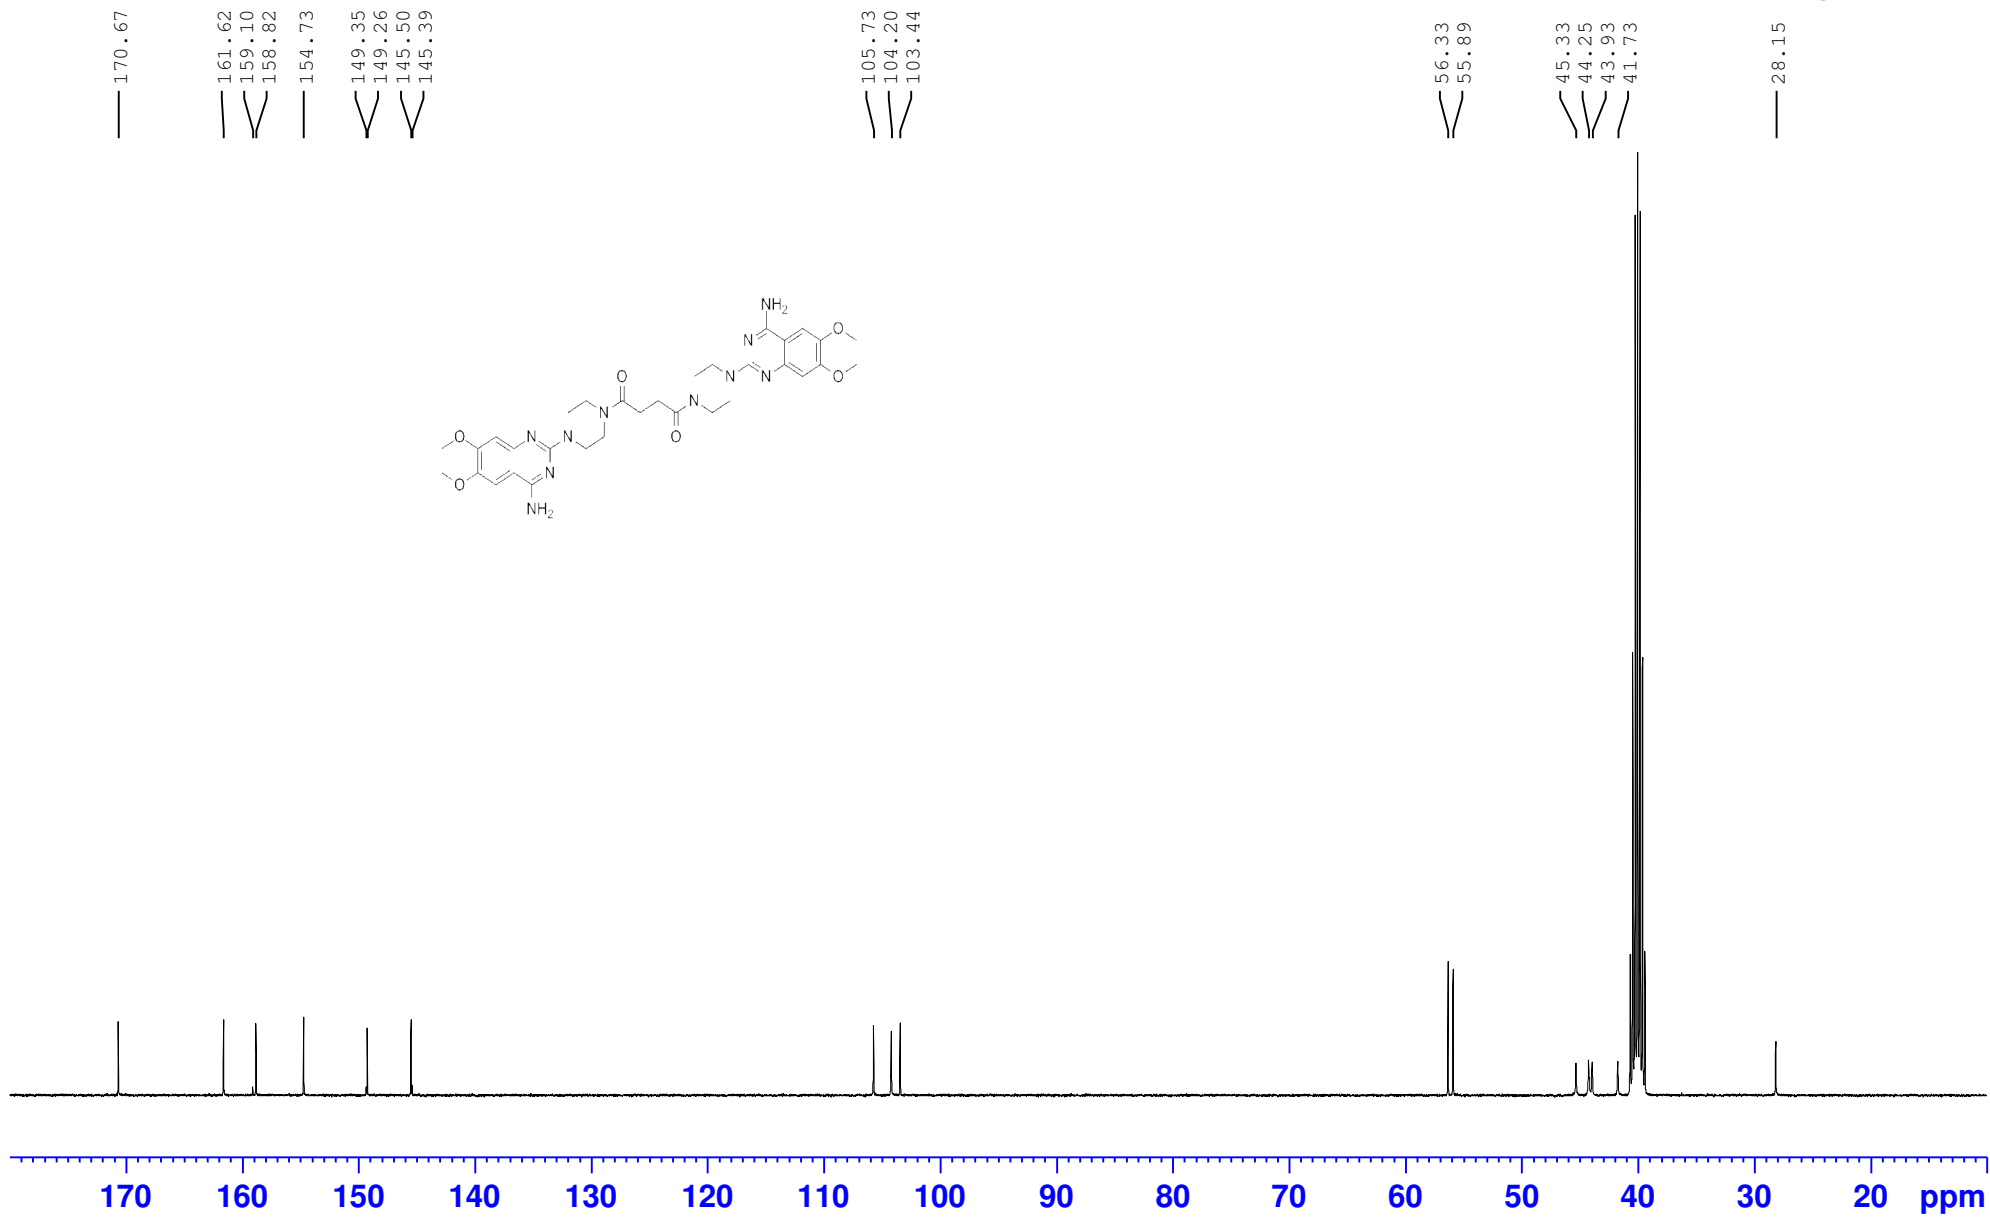

# ==== Shimadzu LabSolutions Data Report ====

Sample ID : 1                      Acquired                      1/4/2020 6:29:37 PM  
Data Filename : CF-F-01.lcd

<Chromatogram>

Segment#1

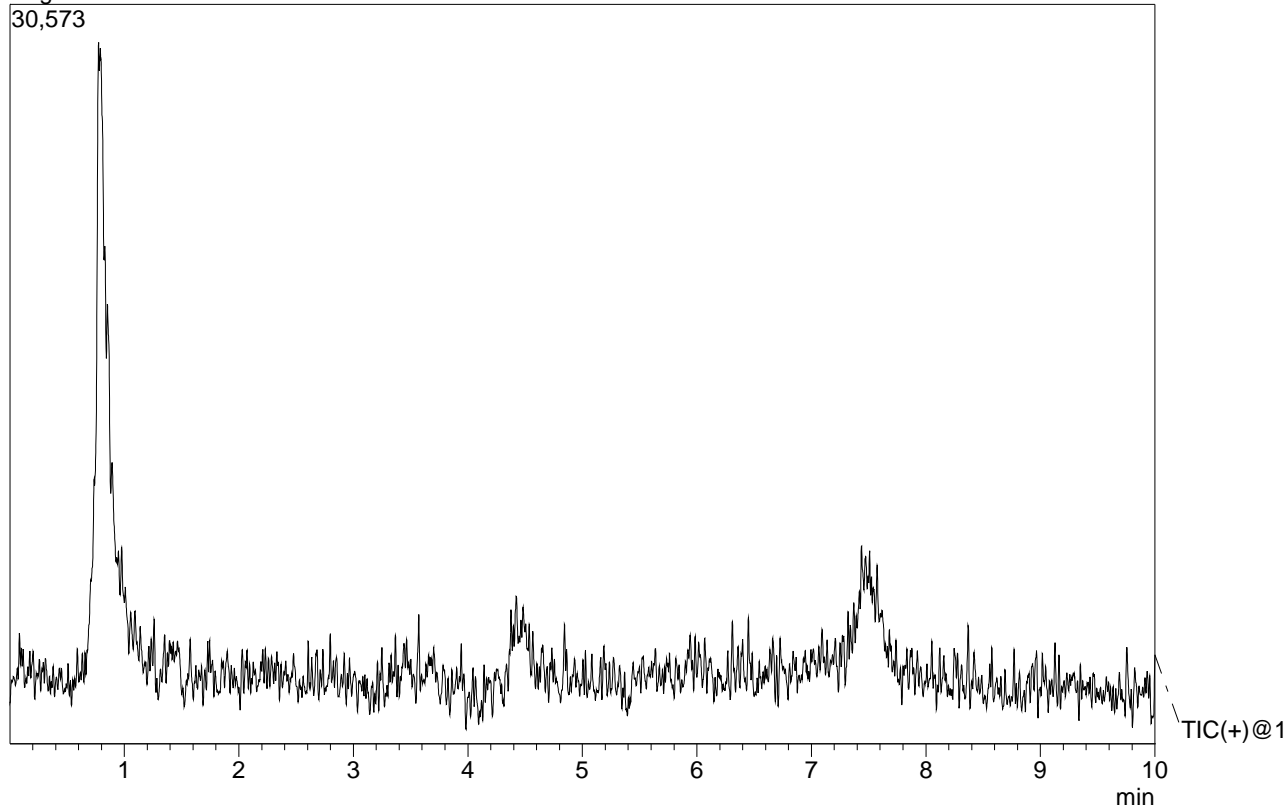

<Spectrum>

R.Time:----(Scan#:----)  
MassPeaks:526 BasePeak:661.10(3020)  
Spectrum Mode:Averaged 0.665-1.033(400-621)  
BG Mode:None Polarity:Positive Segment 1 - Event 1

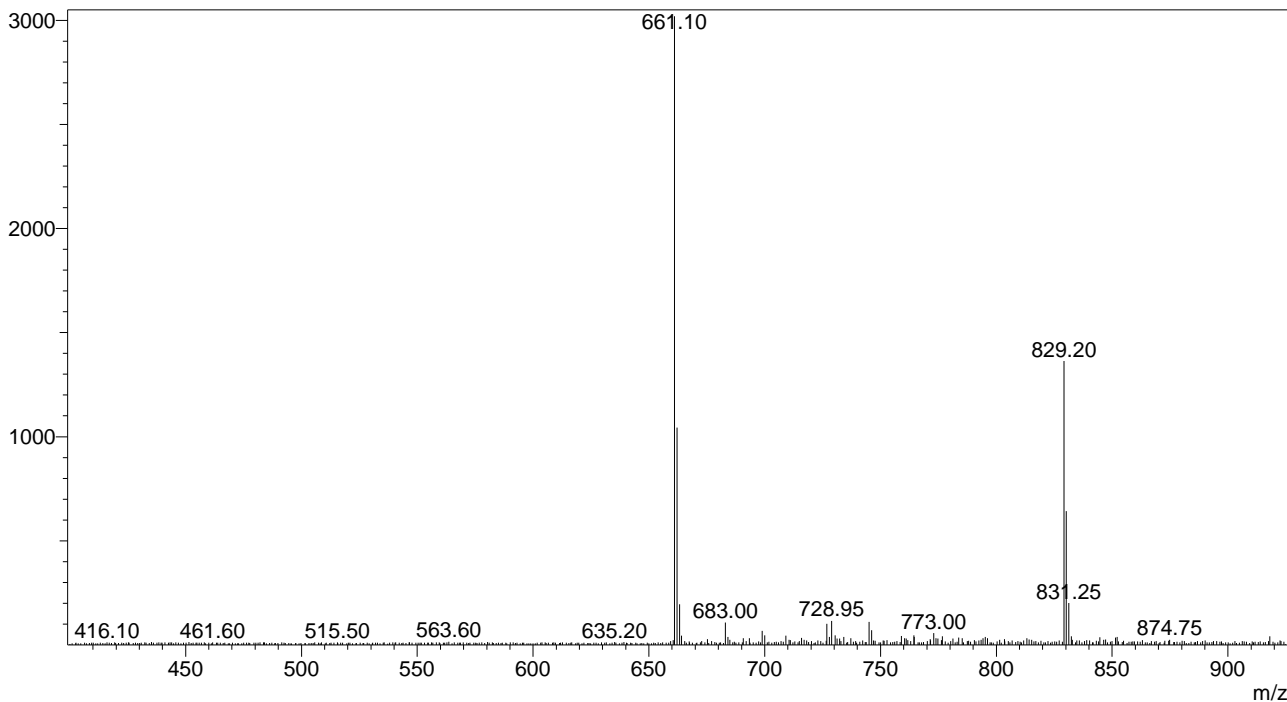

# Analysis Report

## <Sample Information>

Sample Name : CF\_01  
 Sample ID : CF\_001  
 Data Filename : CF\_Batch\_13\_6\_20\_6182020\_001.lcd  
 Method Filename : PDA\_6\_18\_20\_batch.lcm  
 Batch Filename : CF\_Batch\_13\_6\_20.lcb  
 Vial # : 1-1  
 Injection Volume : 5 uL  
 Date Acquired : 6/18/2020 9:54:20 AM  
 Date Processed : 6/18/2020 10:04:24 AM

Sample Type : Unknown  
 Acquired by : System Administrator  
 Processed by : System Administrator

## <Chromatogram>

mAU

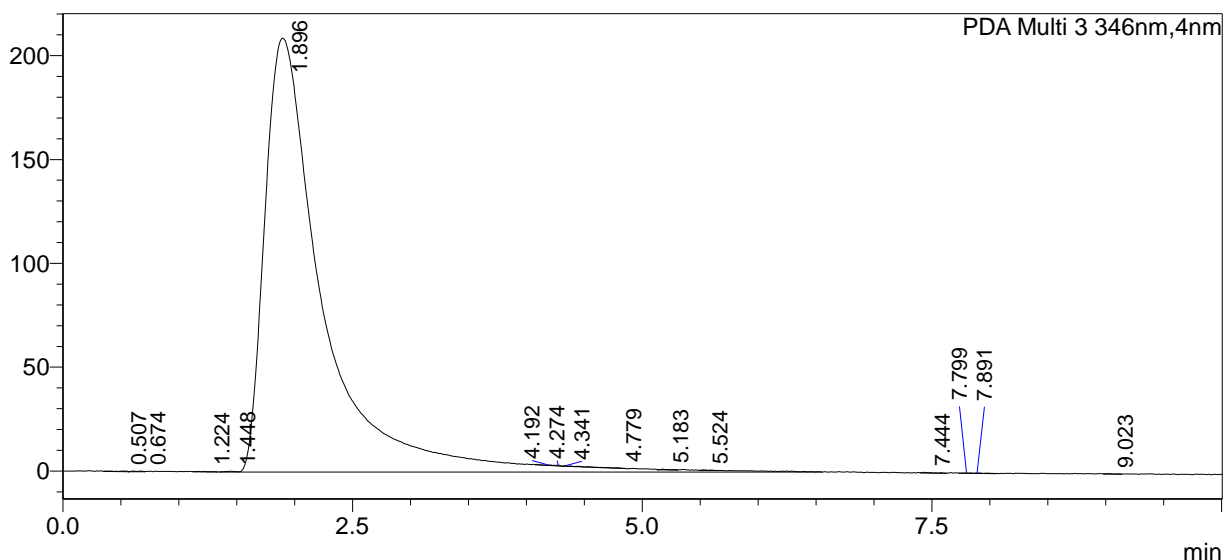

## <Peak Table>

PDA Ch3 346nm

| Peak# | Ret. Time | Area    | Height | Peak Purity Index    |
|-------|-----------|---------|--------|----------------------|
| 1     | 0.507     | 1844    | 234    | Cannot be calculated |
| 2     | 0.674     | 1458    | 305    | Cannot be calculated |
| 3     | 1.224     | 2239    | 247    | Cannot be calculated |
| 4     | 1.448     | 1494    | 336    | Cannot be calculated |
| 5     | 1.896     | 7301128 | 208846 | 0.999930             |
| 6     | 4.192     | 1046    | 254    | Cannot be calculated |
| 7     | 4.274     | 1124    | 373    | Cannot be calculated |
| 8     | 4.341     | 1141    | 294    | Cannot be calculated |
| 9     | 4.779     | 2401    | 239    | Cannot be calculated |
| 10    | 5.183     | 1538    | 264    | Cannot be calculated |
| 11    | 5.524     | 1150    | 203    | Cannot be calculated |
| 12    | 7.444     | 1964    | 395    | Cannot be calculated |
| 13    | 7.799     | 1000    | 272    | Cannot be calculated |
| 14    | 7.891     | 1725    | 264    | Cannot be calculated |
| 15    | 9.023     | 1323    | 277    | Cannot be calculated |
| Total |           | 7322575 | 212802 |                      |



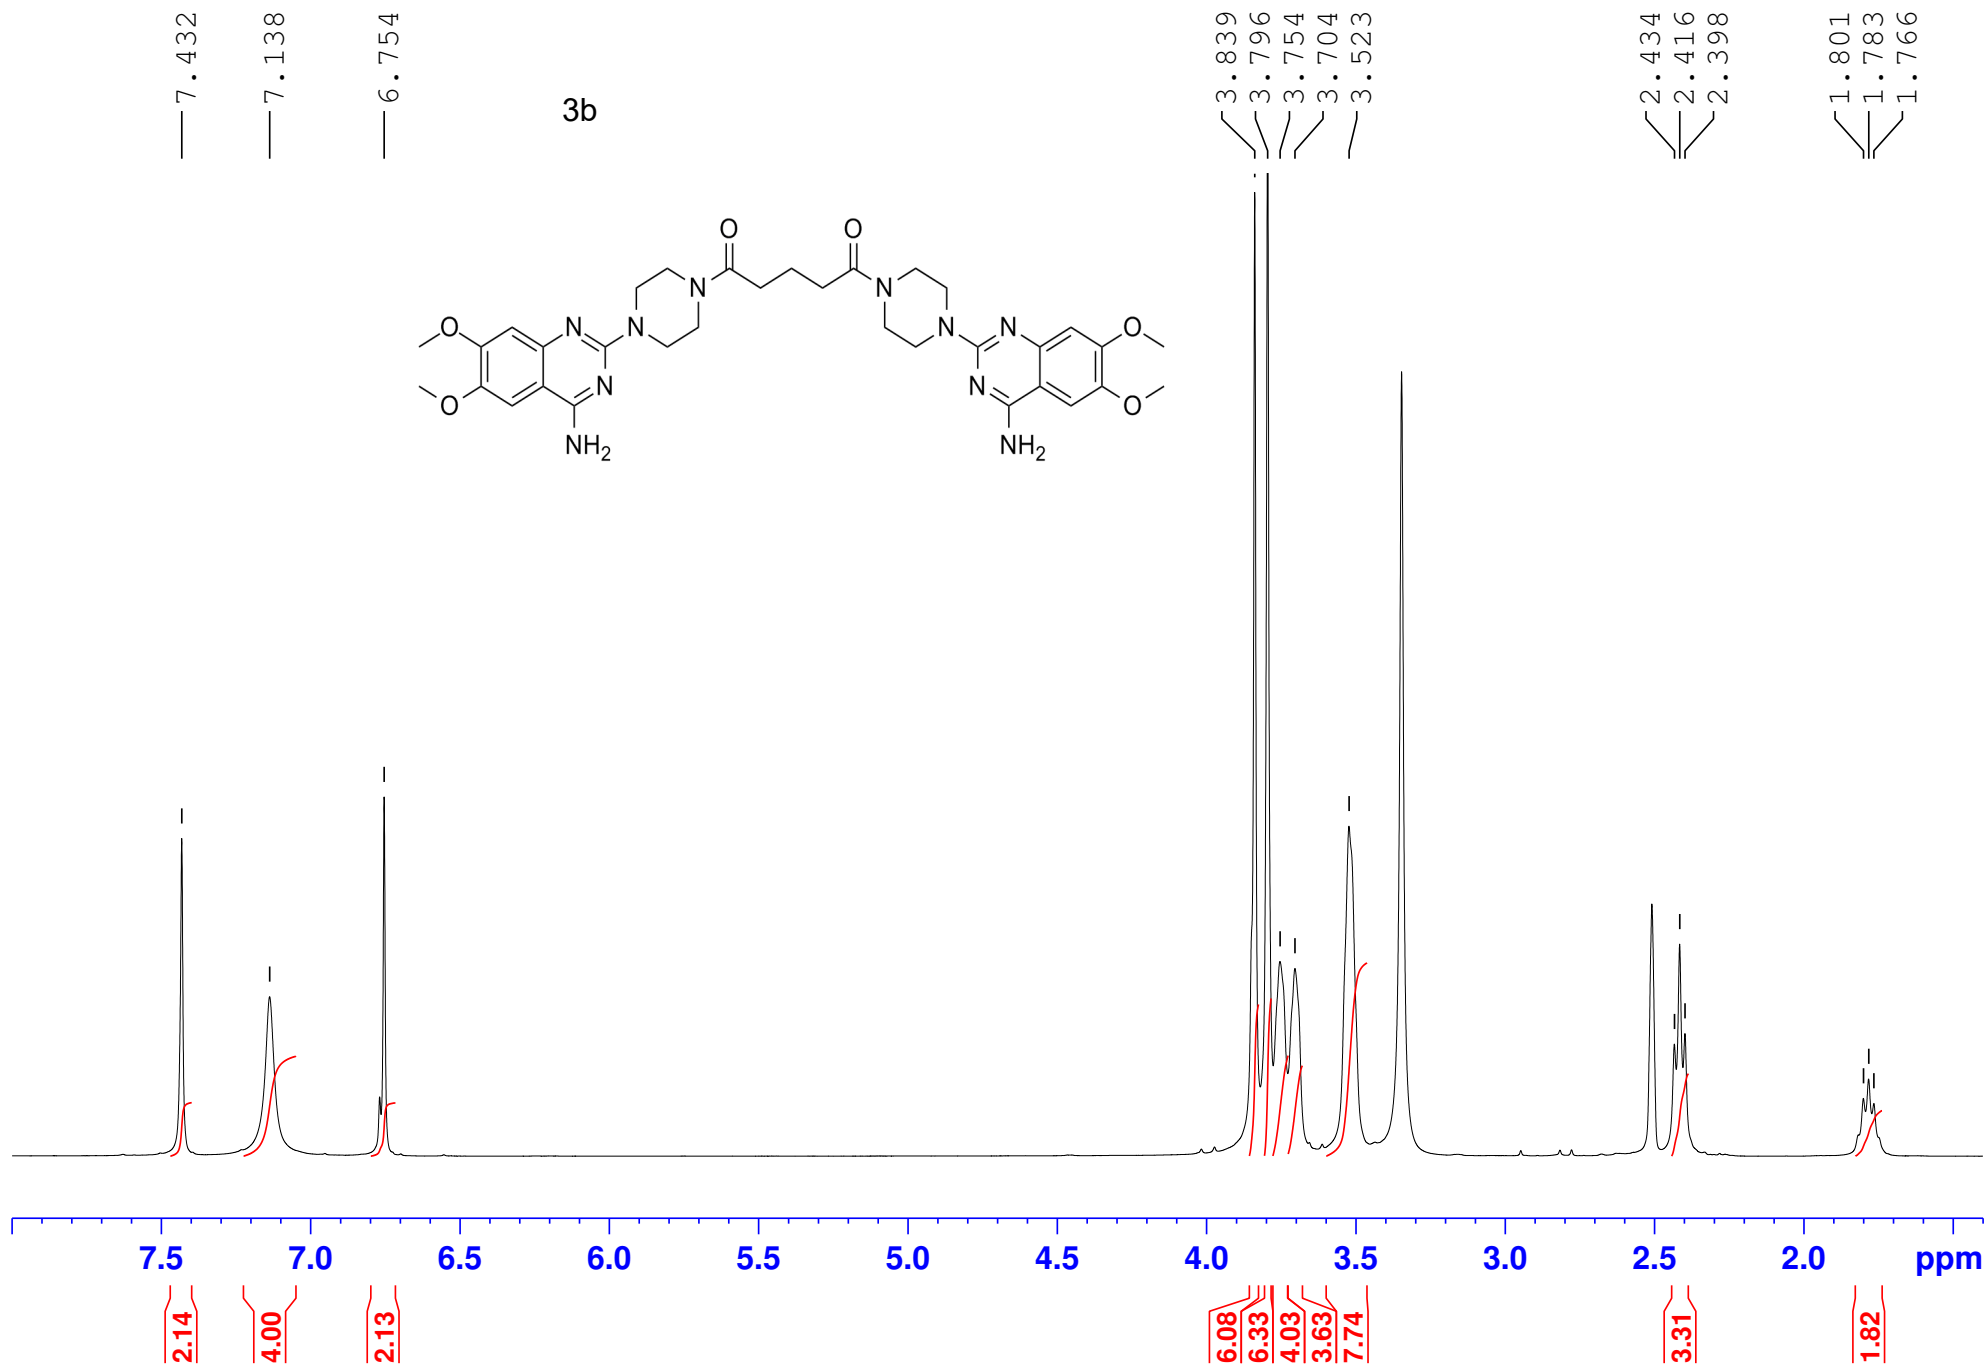

171.09

161.62

159.10

158.79

154.73

149.35

149.26

145.50

145.39

105.72

104.19

103.44

56.33

55.89

45.34

44.33

44.18

43.94

41.54

32.41

21.09

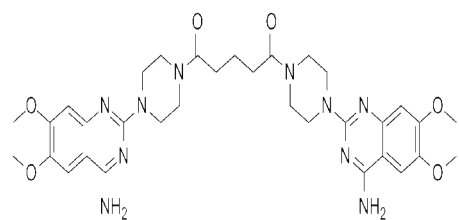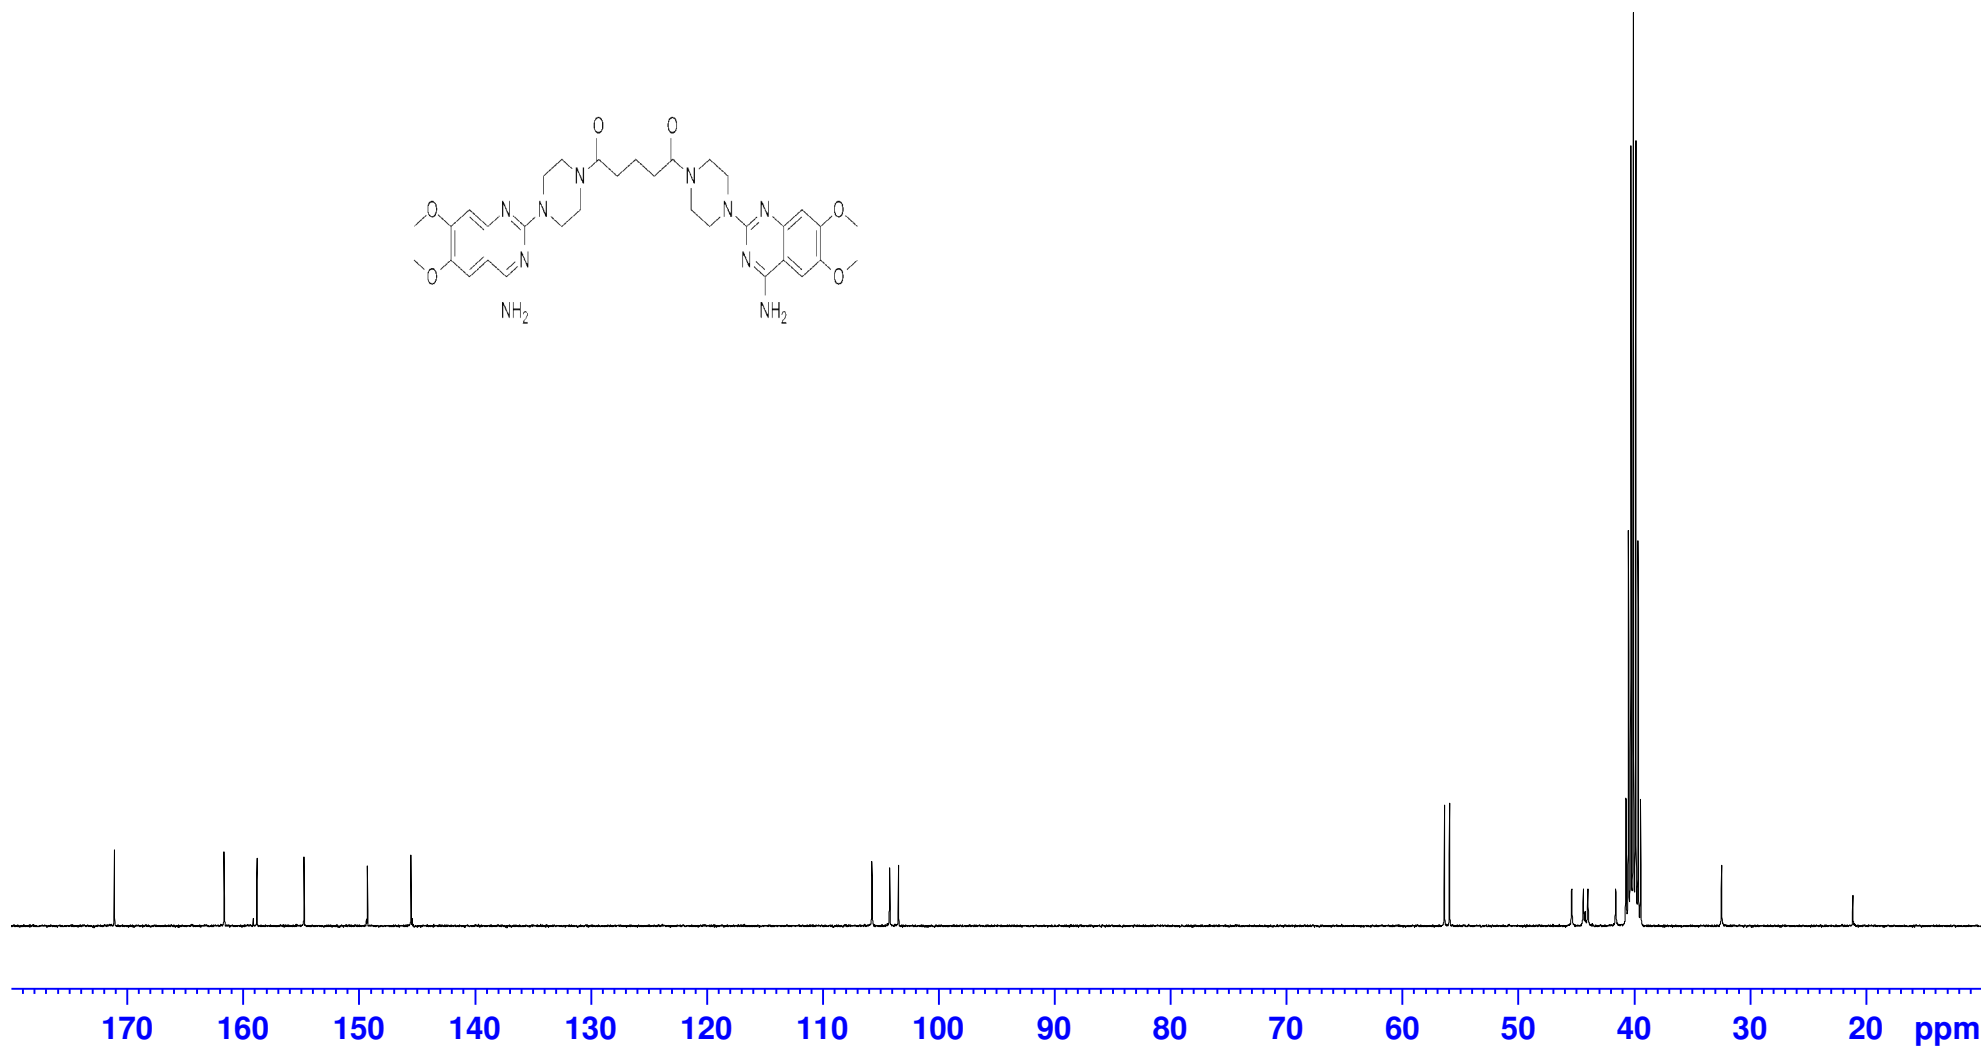

# ==== Shimadzu LabSolutions Data Report ====

Sample ID : 1 Acquired 1/4/2020 6:18:39 PM  
Data Filename : CF-F-02.lcd

<Chromatogram>

Segment#1

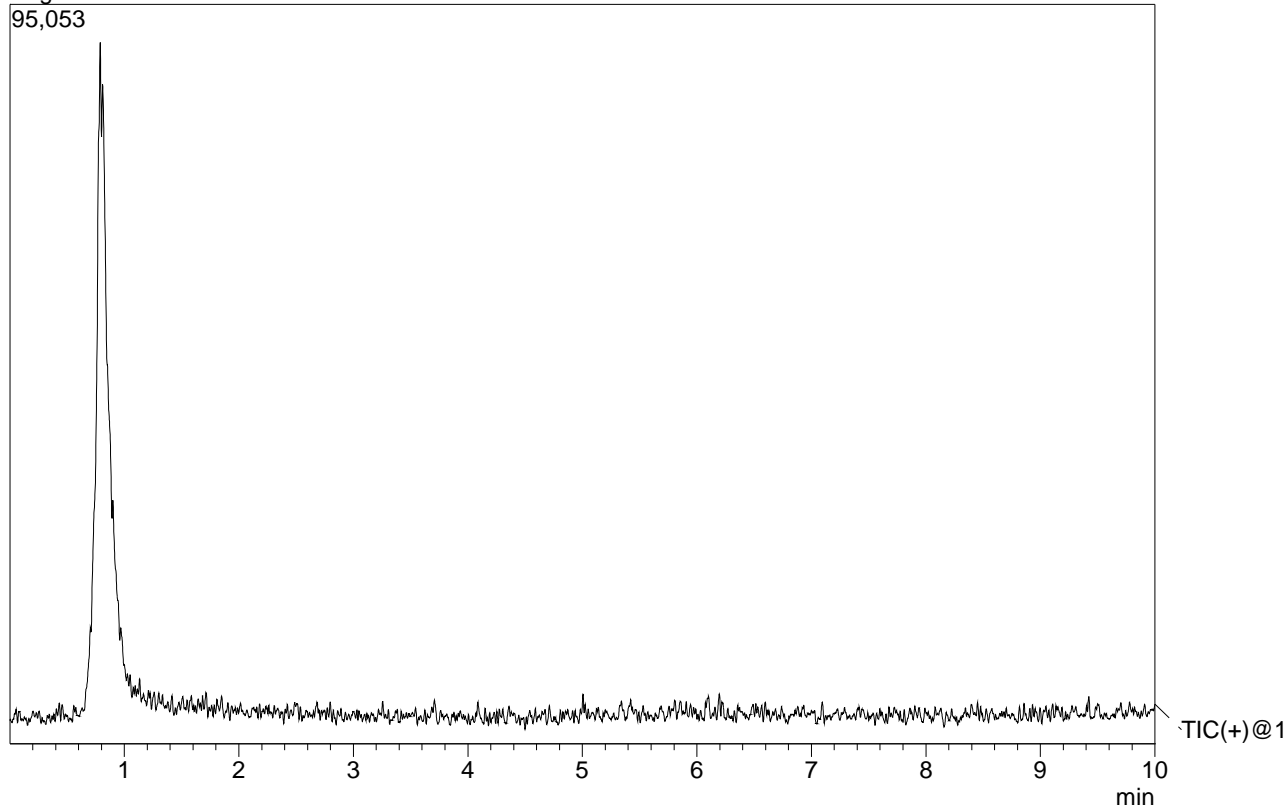

<Spectrum>

R.Time:----(Scan#:----)  
MassPeaks:526 BasePeak:675.15(14332)  
Spectrum Mode:Averaged 0.647-1.078(389-648)  
BG Mode:None Polarity:Positive Segment 1 - Event 1

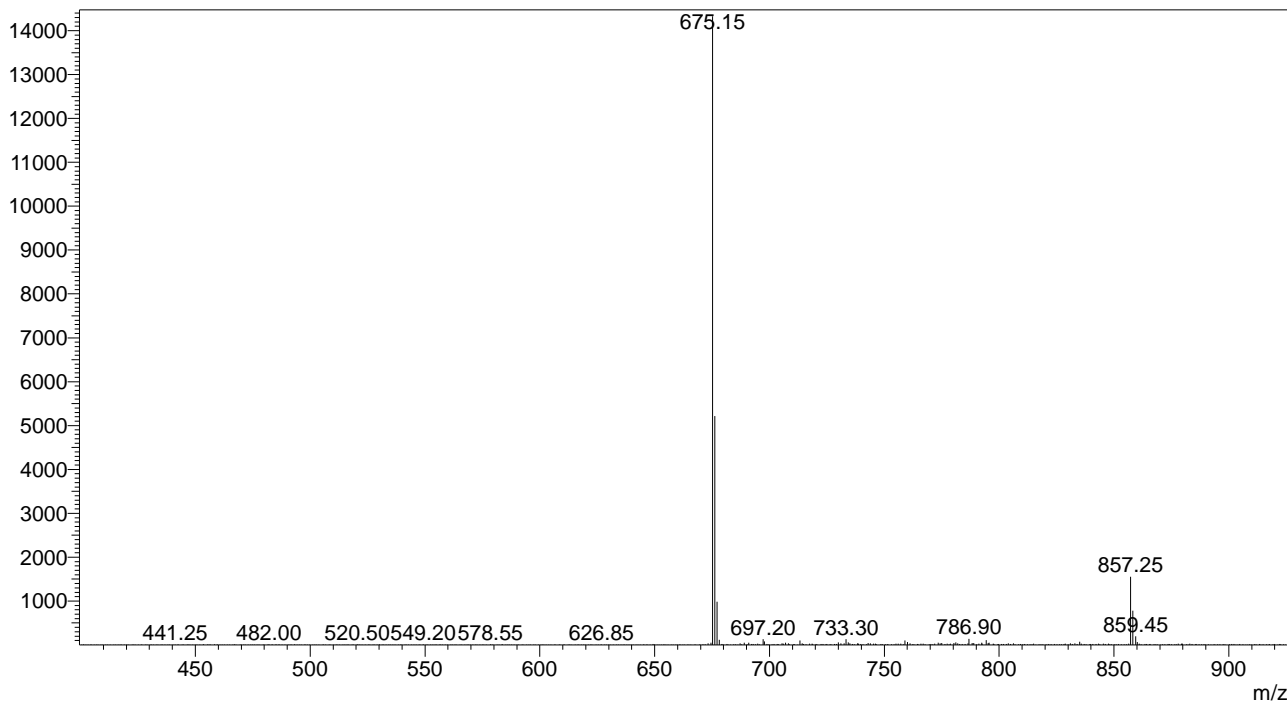

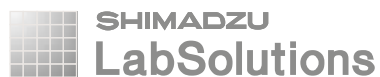

# Analysis Report

## <Sample Information>

Sample Name : CF\_02  
 Sample ID : CF\_002  
 Data Filename : CF\_Batch\_13\_6\_20\_6182020\_002.lcd  
 Method Filename : PDA\_6\_18\_20\_batch.lcm  
 Batch Filename : CF\_Batch\_13\_6\_20.lcb  
 Vial # : 1-2  
 Injection Volume : 5 uL  
 Date Acquired : 6/18/2020 10:04:48 AM  
 Date Processed : 6/18/2020 10:14:53 AM  
 Sample Type : Unknown  
 Acquired by : System Administrator  
 Processed by : System Administrator

## <Chromatogram>

mAU

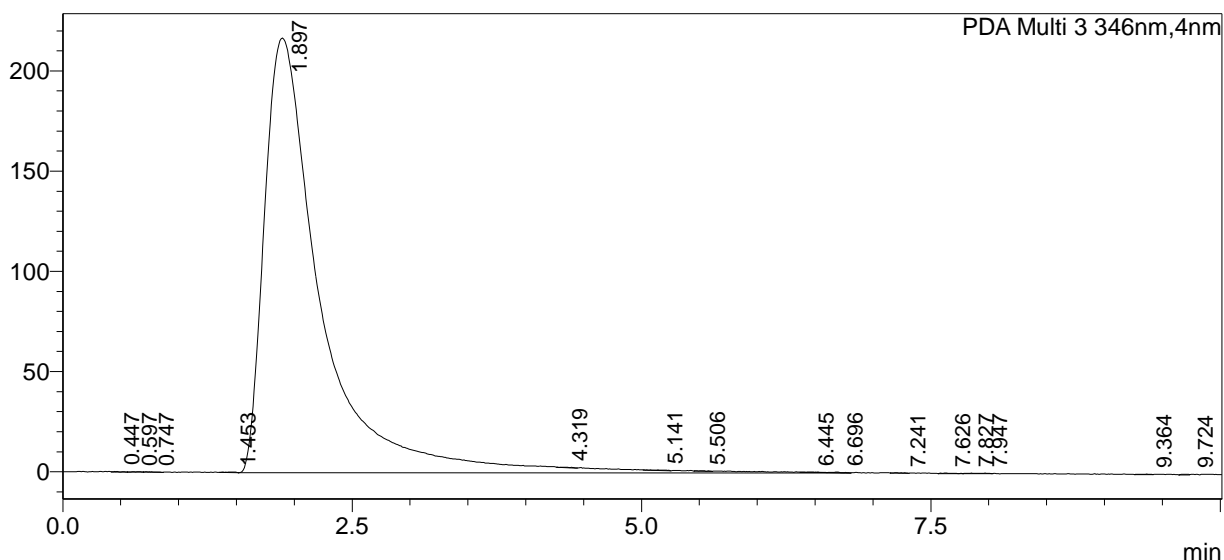

## <Peak Table>

PDA Ch3 346nm

| Peak# | Ret. Time | Area    | Height | Peak Purity Index    |
|-------|-----------|---------|--------|----------------------|
| 1     | 0.447     | 1414    | 289    | Cannot be calculated |
| 2     | 0.597     | 1151    | 195    | Cannot be calculated |
| 3     | 0.747     | 1129    | 215    | Cannot be calculated |
| 4     | 1.453     | 1656    | 254    | Cannot be calculated |
| 5     | 1.897     | 7391639 | 216848 | 0.999980             |
| 6     | 4.319     | 1101    | 110    | Cannot be calculated |
| 7     | 5.141     | 1563    | 210    | Cannot be calculated |
| 8     | 5.506     | 1330    | 250    | Cannot be calculated |
| 9     | 6.445     | 1428    | 262    | Cannot be calculated |
| 10    | 6.696     | 2202    | 345    | Cannot be calculated |
| 11    | 7.241     | 1269    | 223    | Cannot be calculated |
| 12    | 7.626     | 1559    | 291    | Cannot be calculated |
| 13    | 7.827     | 1125    | 197    | Cannot be calculated |
| 14    | 7.947     | 1067    | 200    | Cannot be calculated |
| 15    | 9.364     | 1573    | 282    | Cannot be calculated |
| 16    | 9.724     | 1146    | 253    | Cannot be calculated |
| Total |           | 7412350 | 220425 |                      |

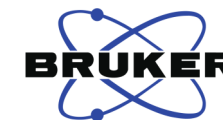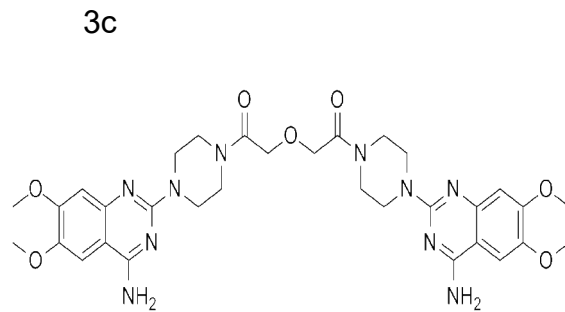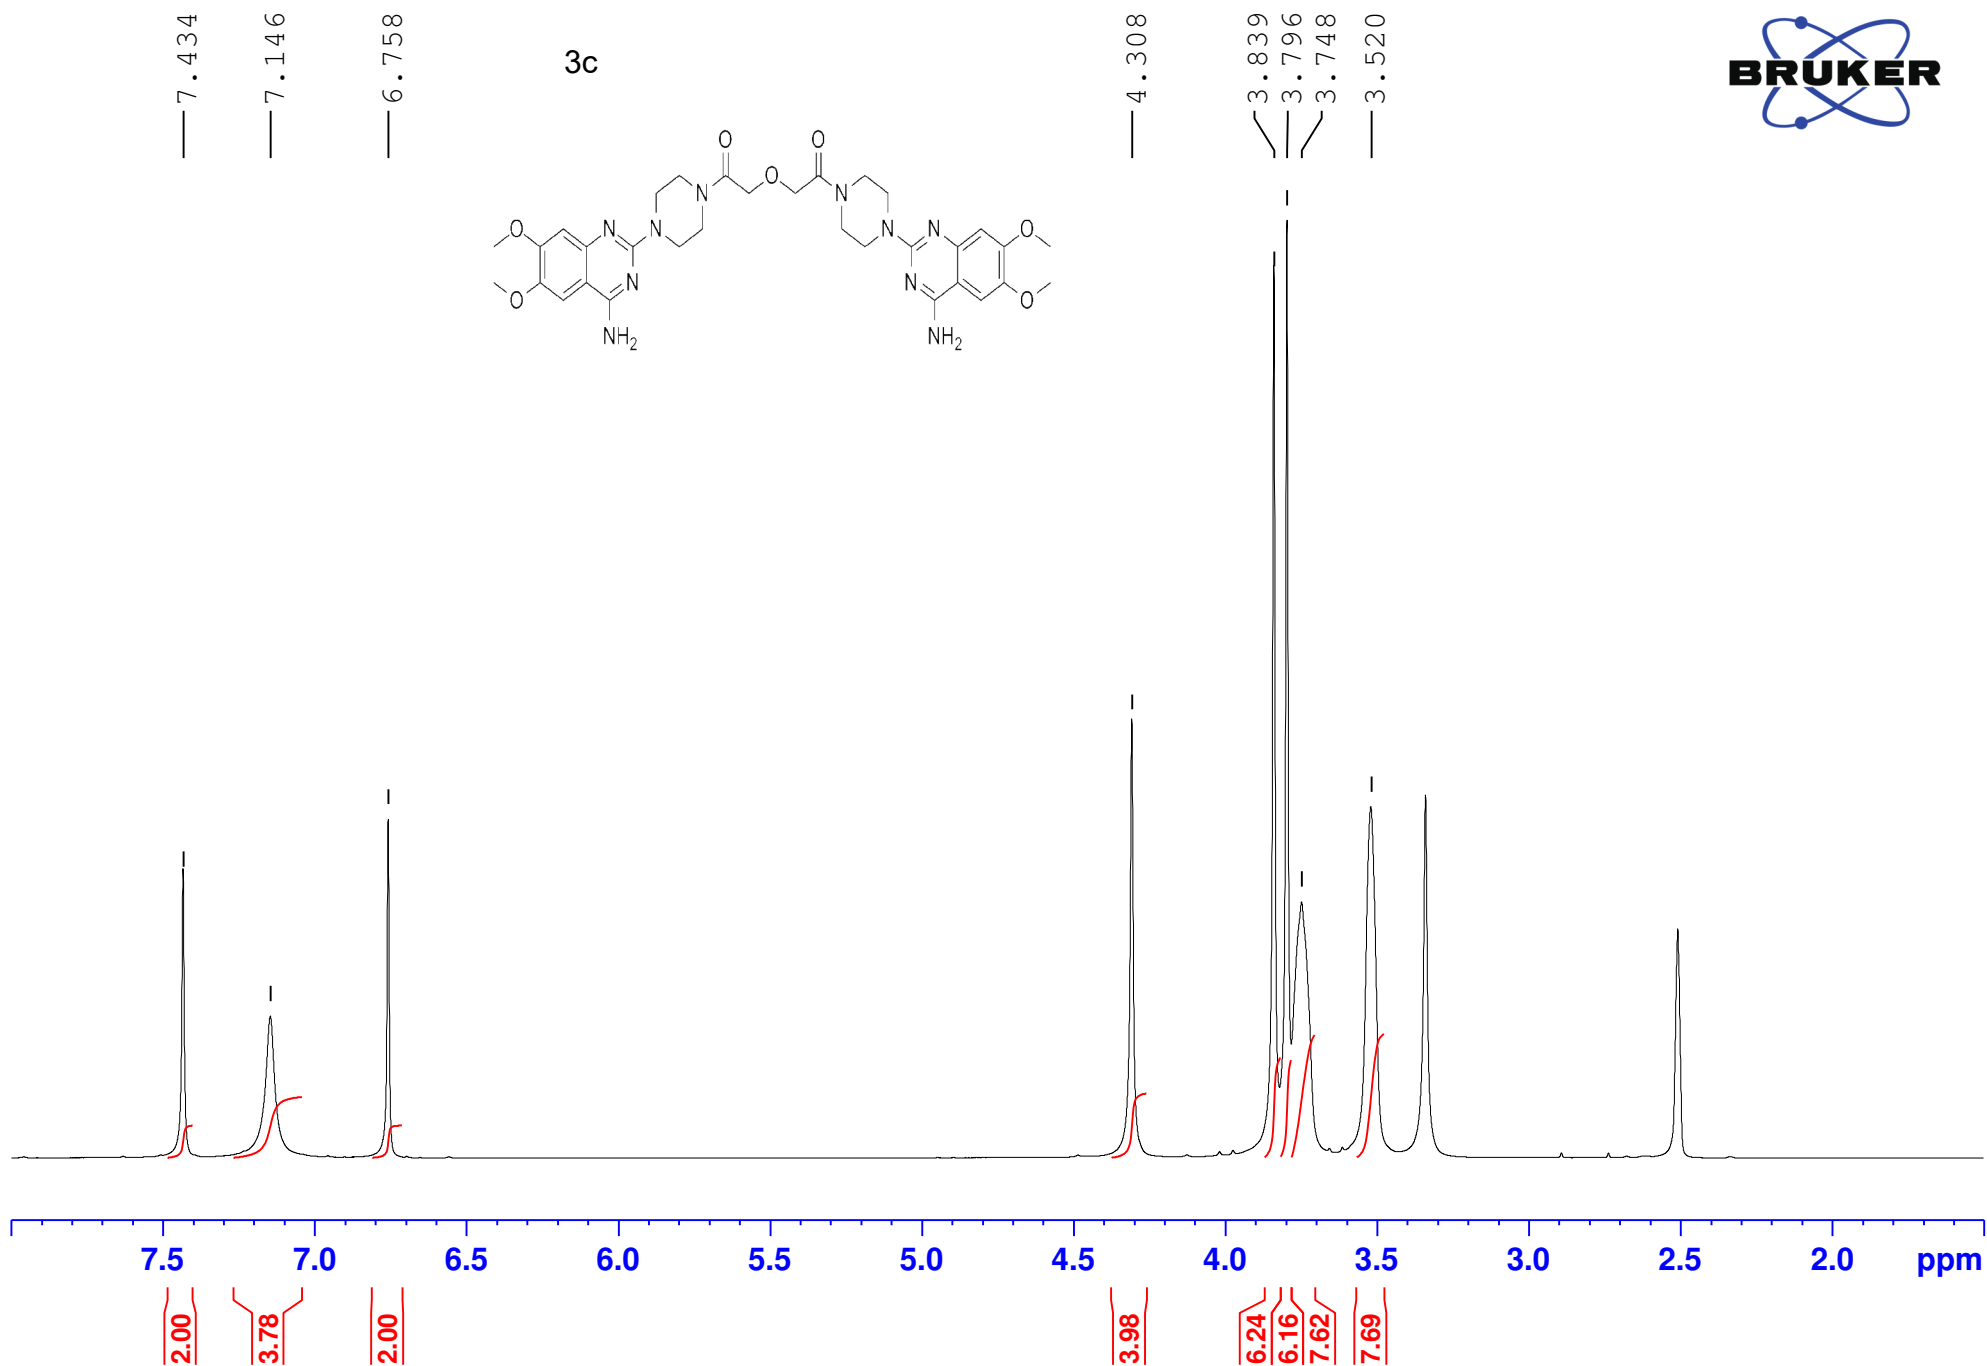

167.62  
161.63  
158.76  
154.73  
149.25  
145.52

105.74  
104.18  
103.45

69.64

56.33  
55.89

44.72  
44.28  
43.87  
41.66

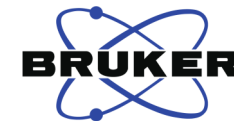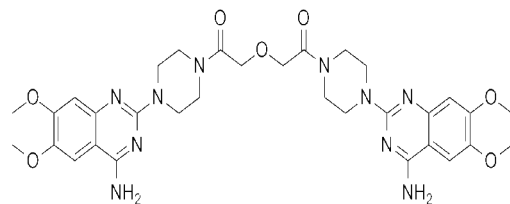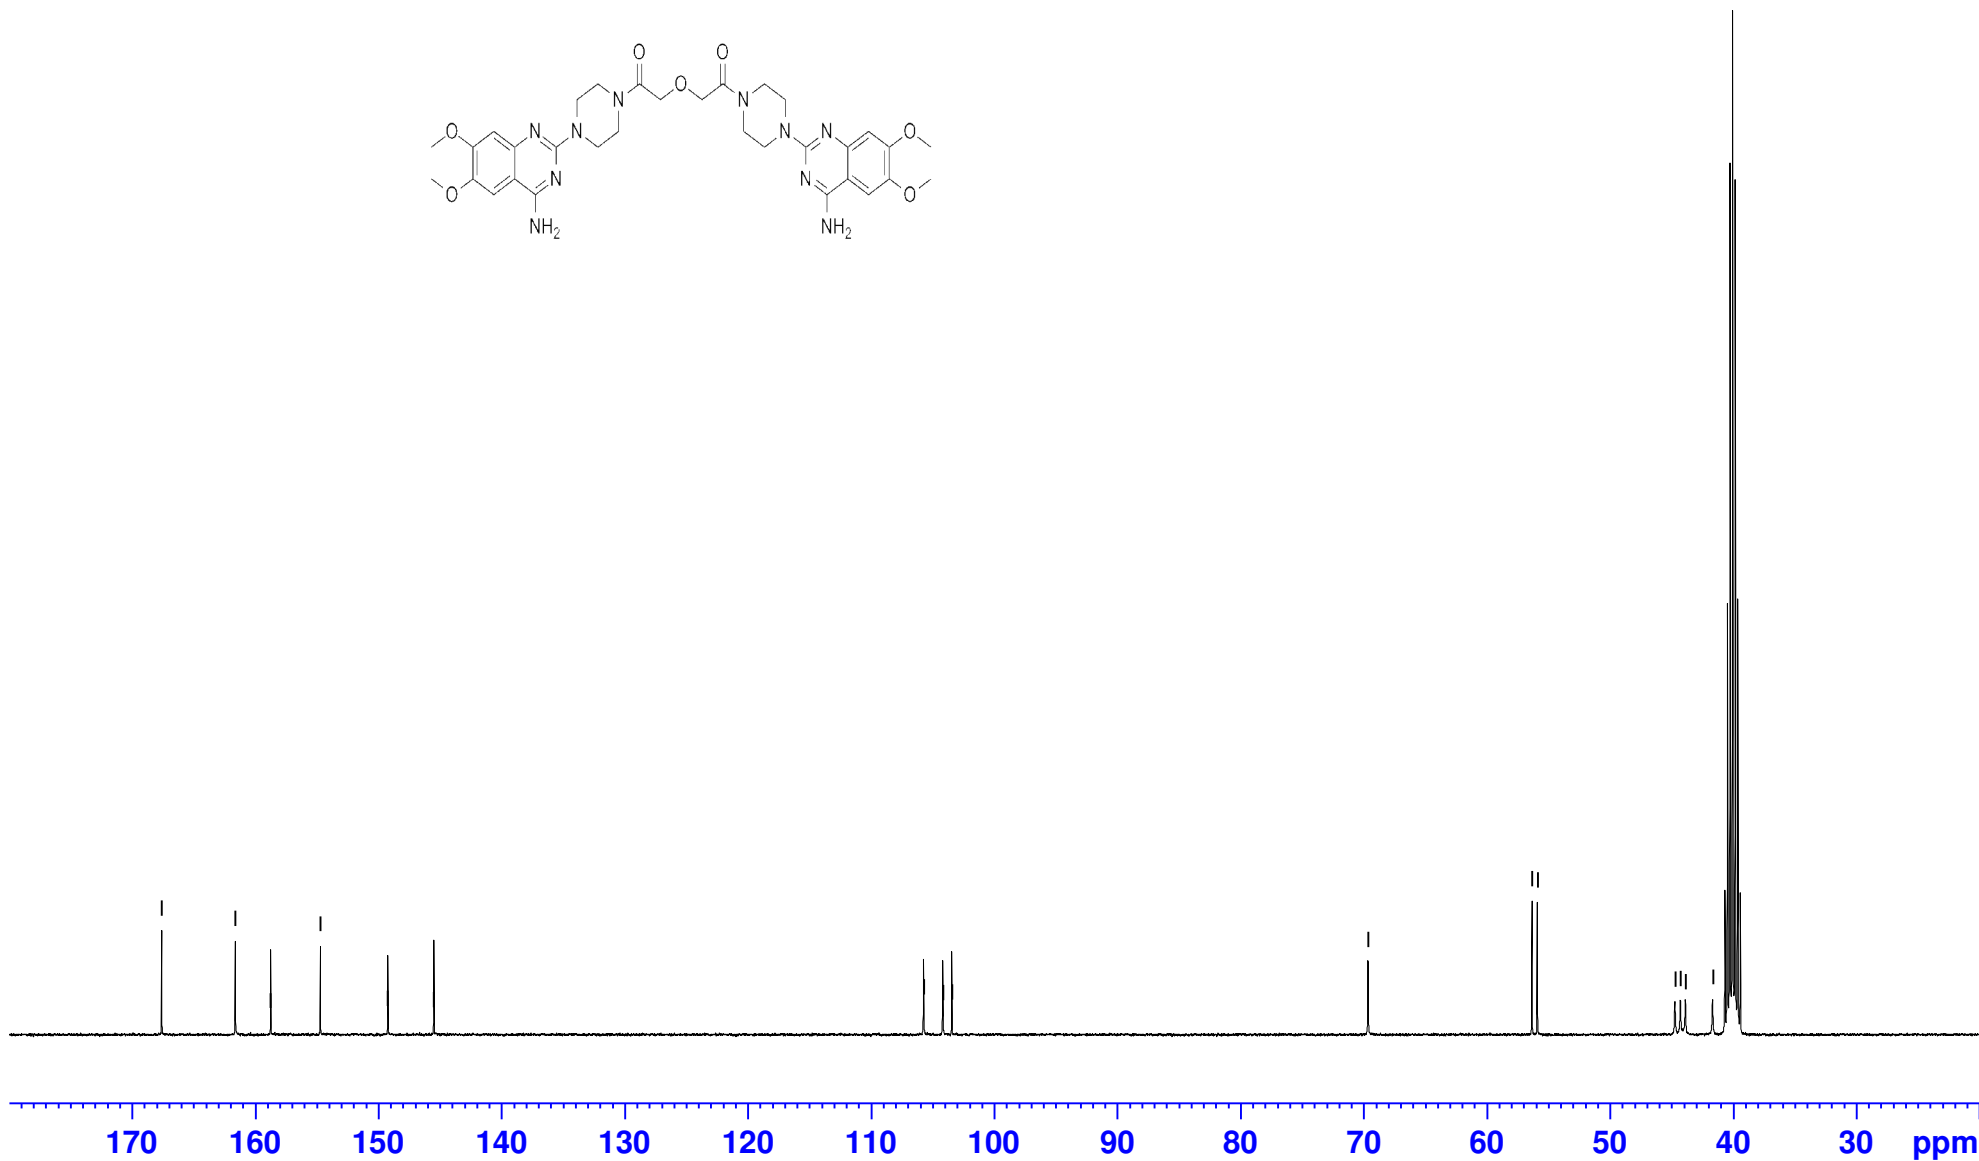

# ==== Shimadzu LabSolutions Data Report ====

Sample ID : 1 Acquired 1/10/2020 12:28:16 AM  
Data Filename : CF-F-03.lcd

## <Chromatogram>

Segment#1

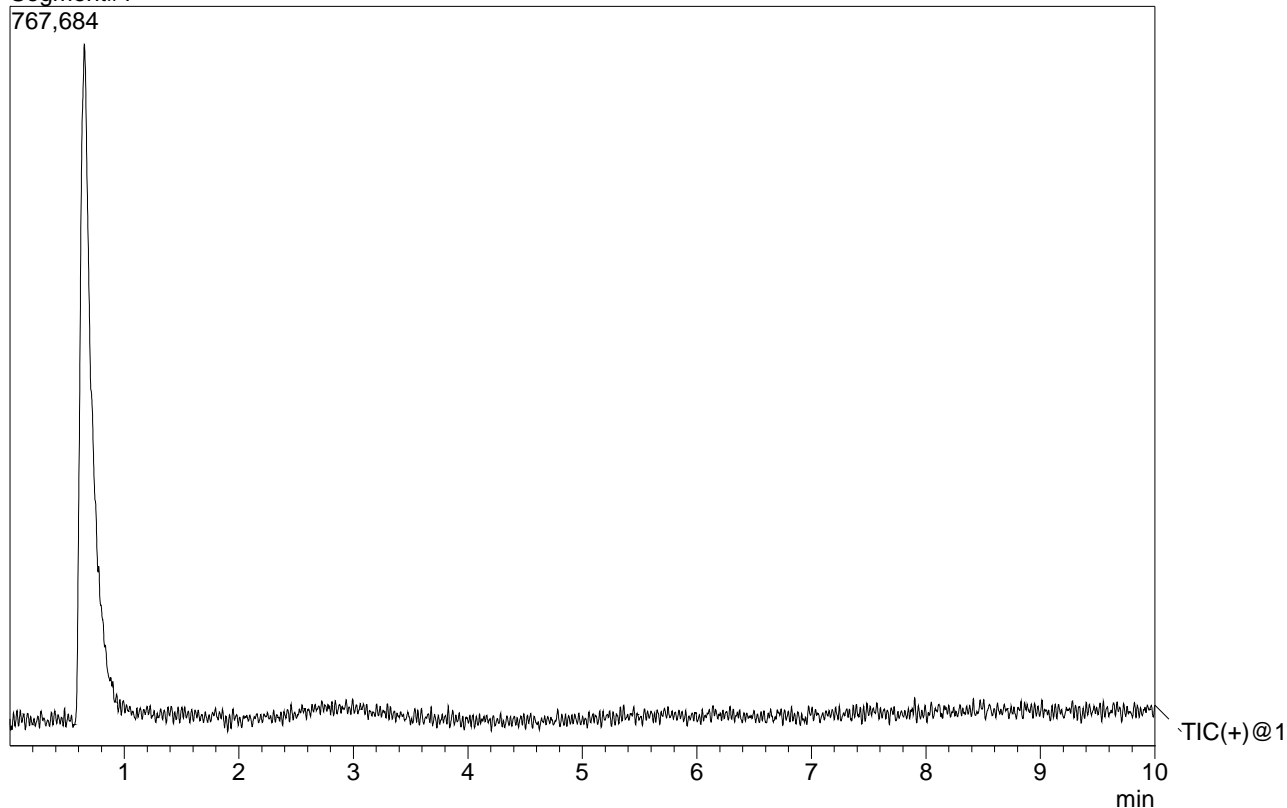

## <Spectrum>

R.Time:----(Scan#:----)  
MassPeaks:401 BasePeak:677.20(97558)  
Spectrum Mode:Averaged 0.585-0.953(352-573)  
BG Mode:None Polarity:Positive Segment 1 - Event 1

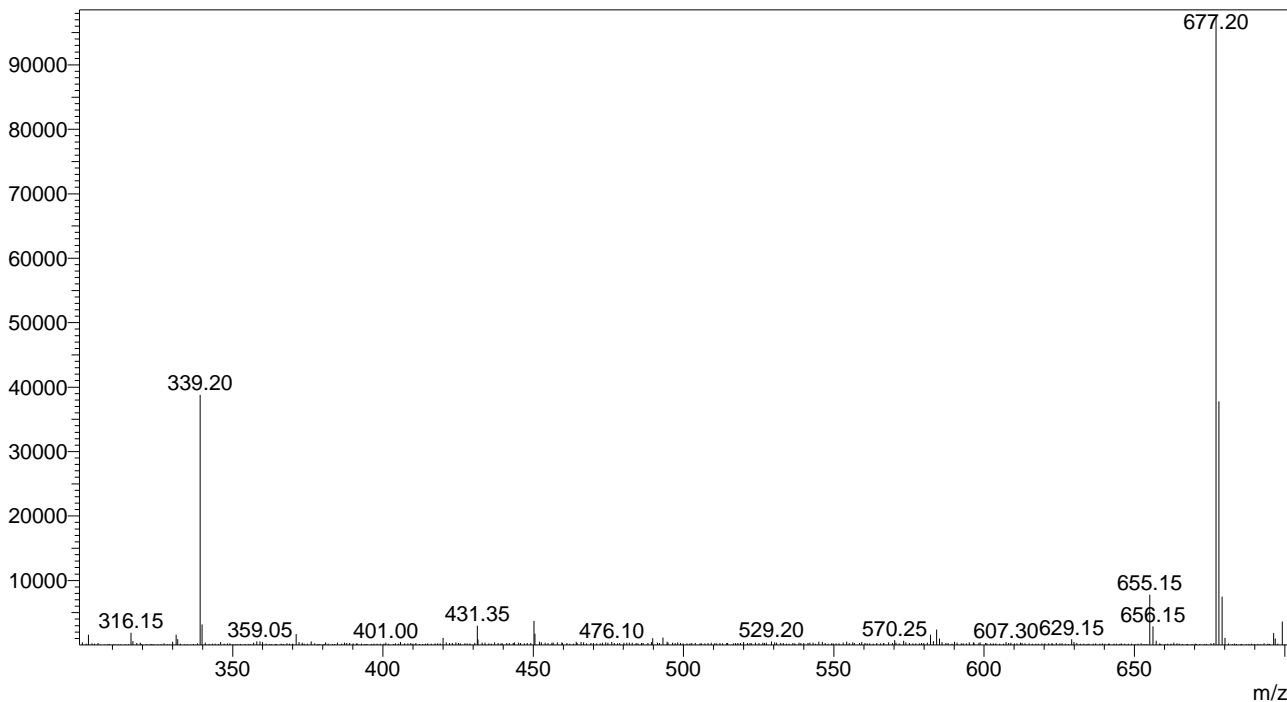



# Analysis Report

## <Sample Information>

Sample Name : CF\_03  
 Sample ID : CF\_03  
 Data Filename : CF\_Batch\_13\_6\_20\_6182020\_003.lcd  
 Method Filename : PDA\_6\_18\_20\_batch.lcm  
 Batch Filename : CF\_Batch\_13\_6\_20.lcb  
 Vial # : 1-3  
 Injection Volume : 5 uL  
 Date Acquired : 6/18/2020 3:30:37 PM  
 Date Processed : 6/18/2020 3:40:43 PM  
 Sample Type : Unknown  
 Acquired by : System Administrator  
 Processed by : System Administrator

## <Chromatogram>

mAU

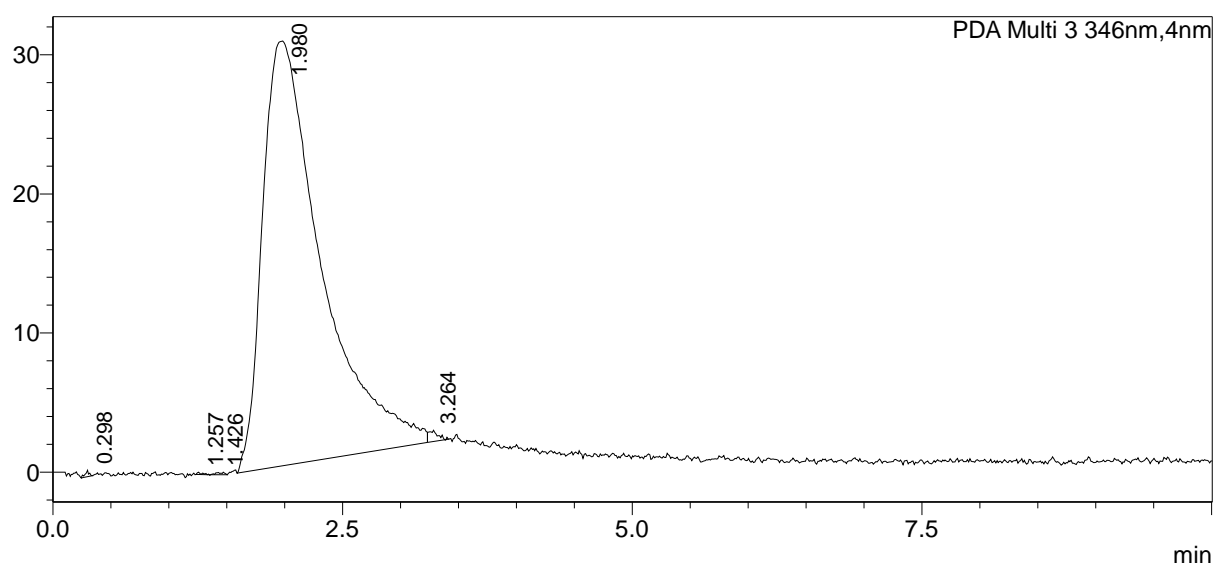

## <Peak Table>

PDA Ch3 346nm

| Peak# | Ret. Time | Area    | Height | Peak Purity Index    |
|-------|-----------|---------|--------|----------------------|
| 1     | 0.298     | 1122    | 459    | Cannot be calculated |
| 2     | 1.257     | 448     | 162    | Cannot be calculated |
| 3     | 1.426     | 706     | 153    | Cannot be calculated |
| 4     | 1.980     | 1076151 | 30534  | 0.975965             |
| 5     | 3.264     | 4368    | 725    | Cannot be calculated |
| Total |           | 1082795 | 32033  |                      |



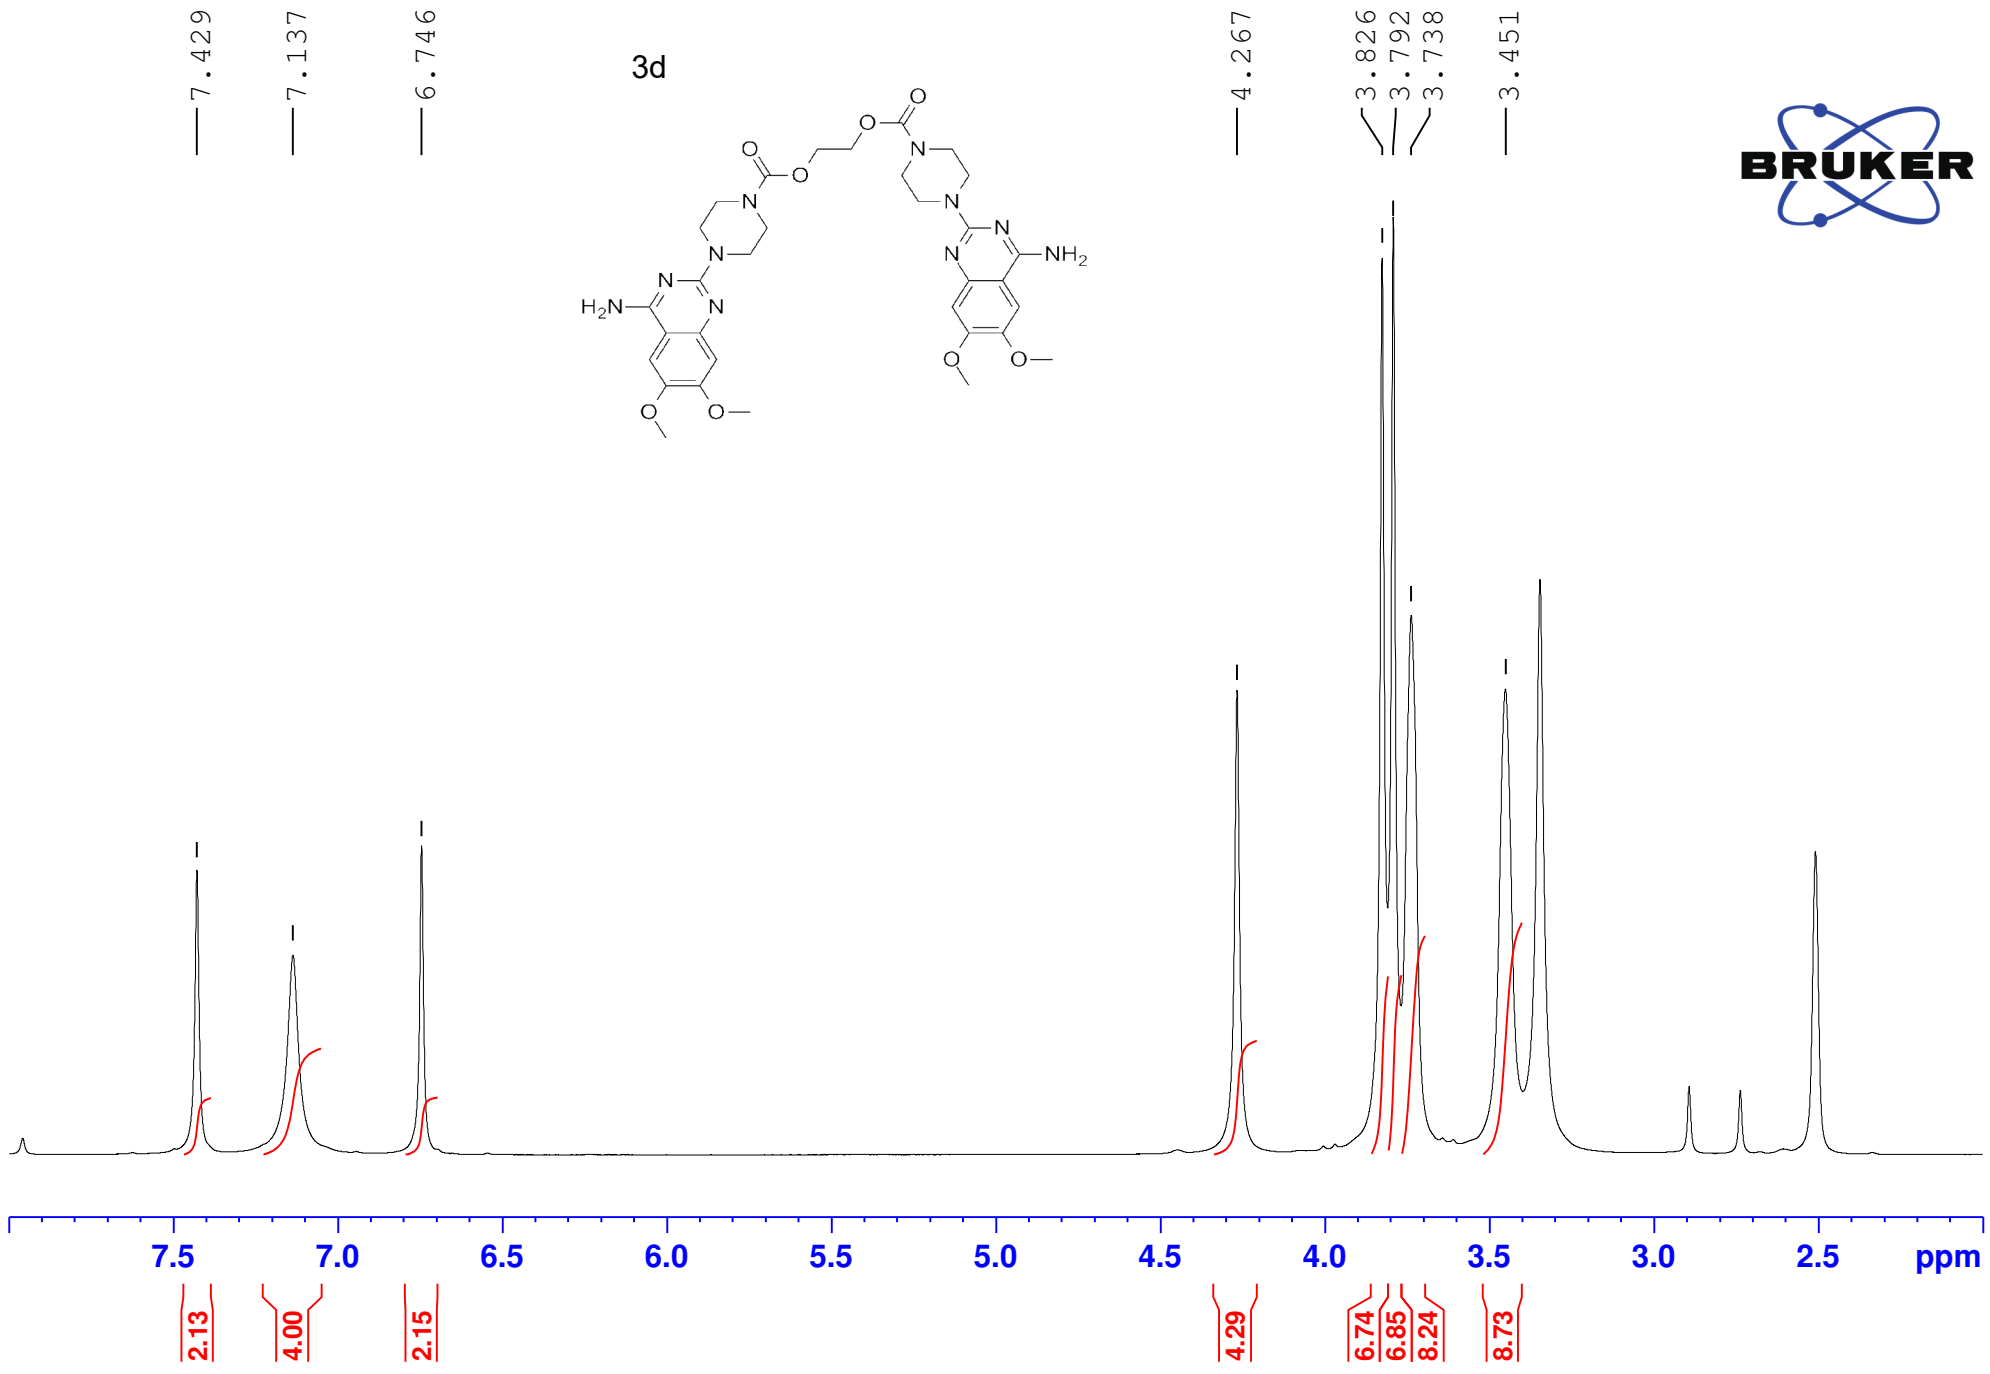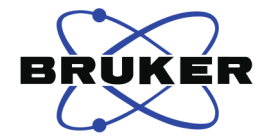

162.77  
161.63  
158.76  
155.00  
154.73  
149.22  
145.52

105.72  
104.19  
103.46

63.67

56.32  
55.87

43.98  
43.80

36.23  
31.25

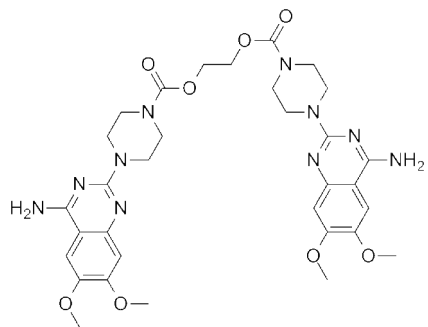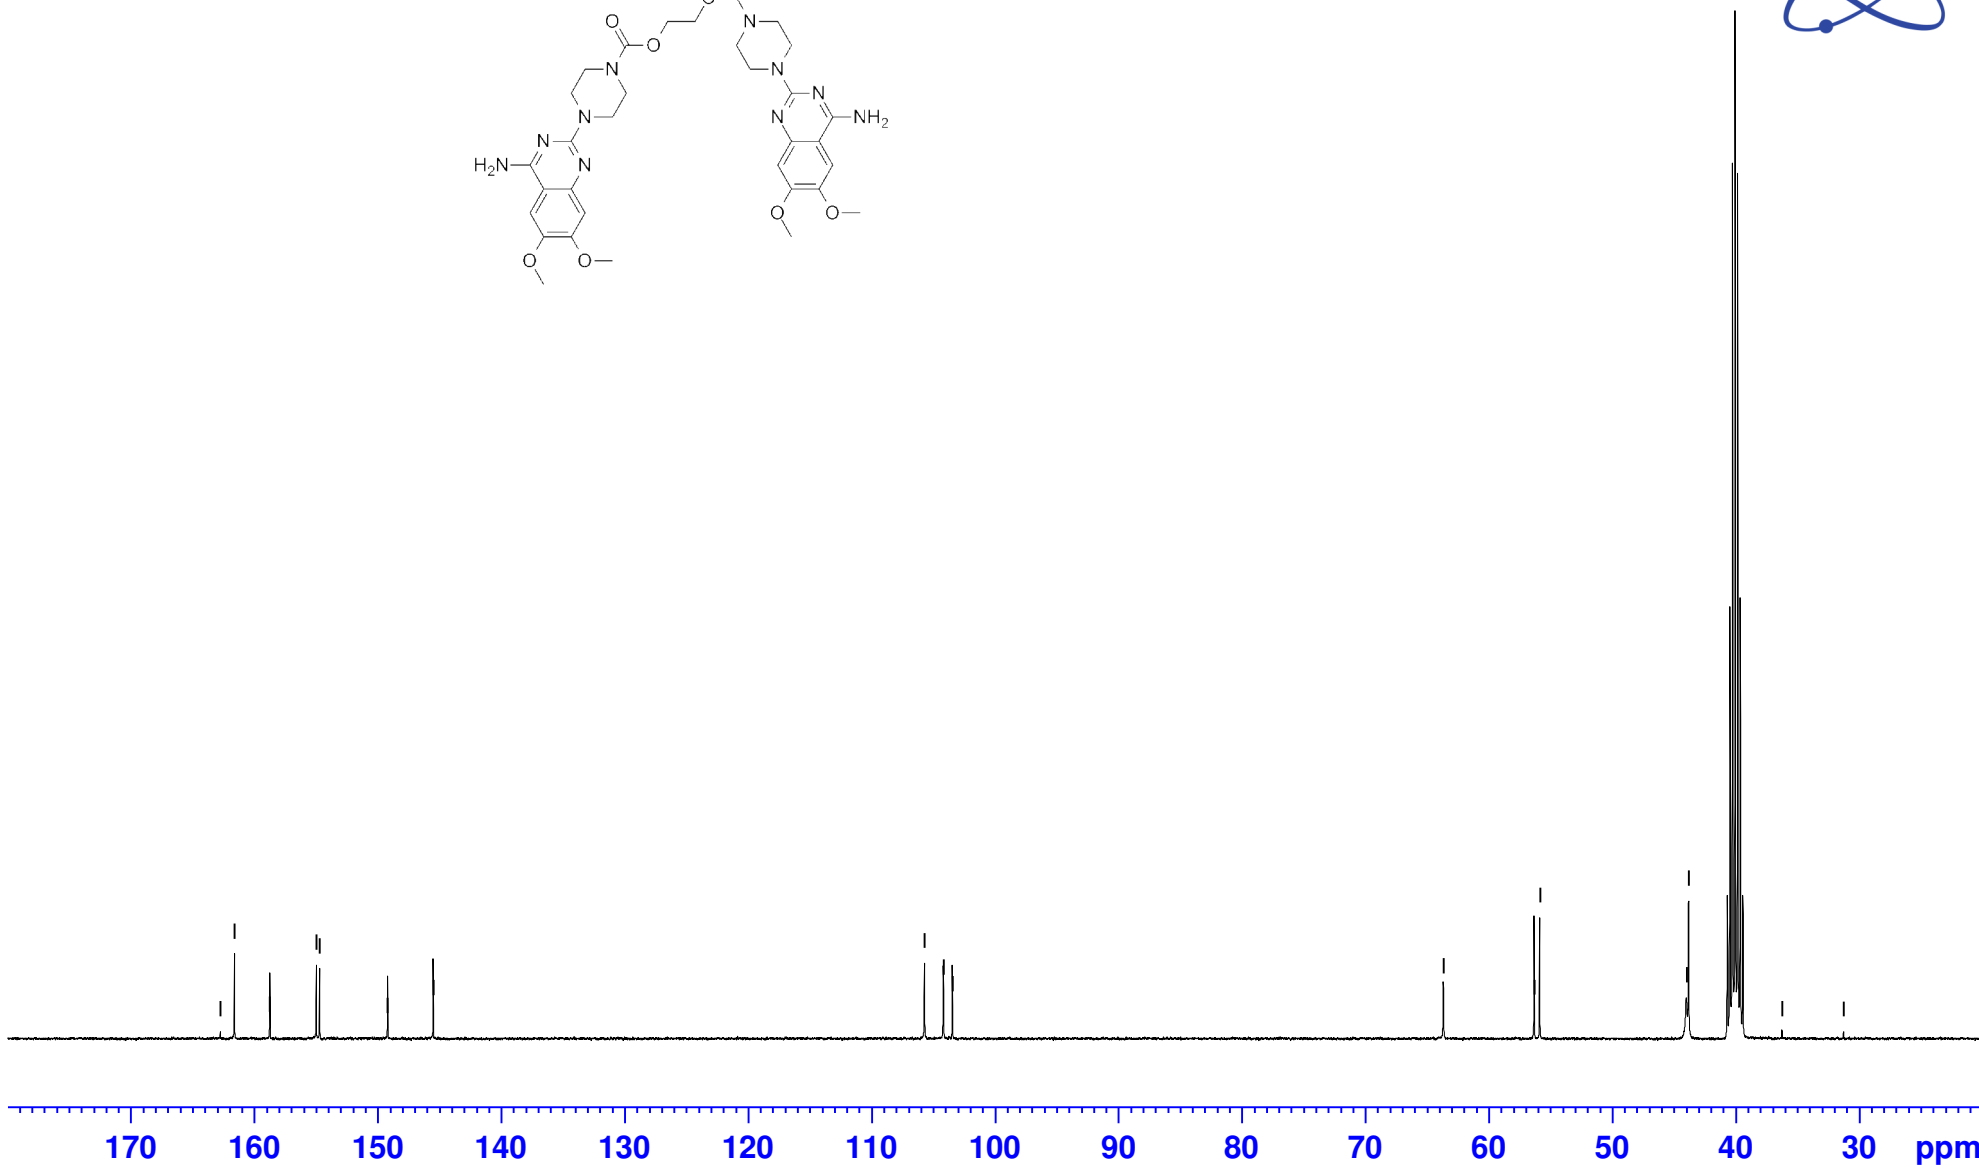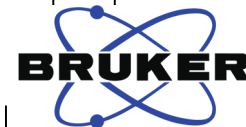

# ==== Shimadzu LabSolutions Data Report ====

Sample ID : 1                      Acquired                      1/4/2020 6:07:27 PM  
Data Filename : CF-F-04.lcd

<Chromatogram>

Segment#1

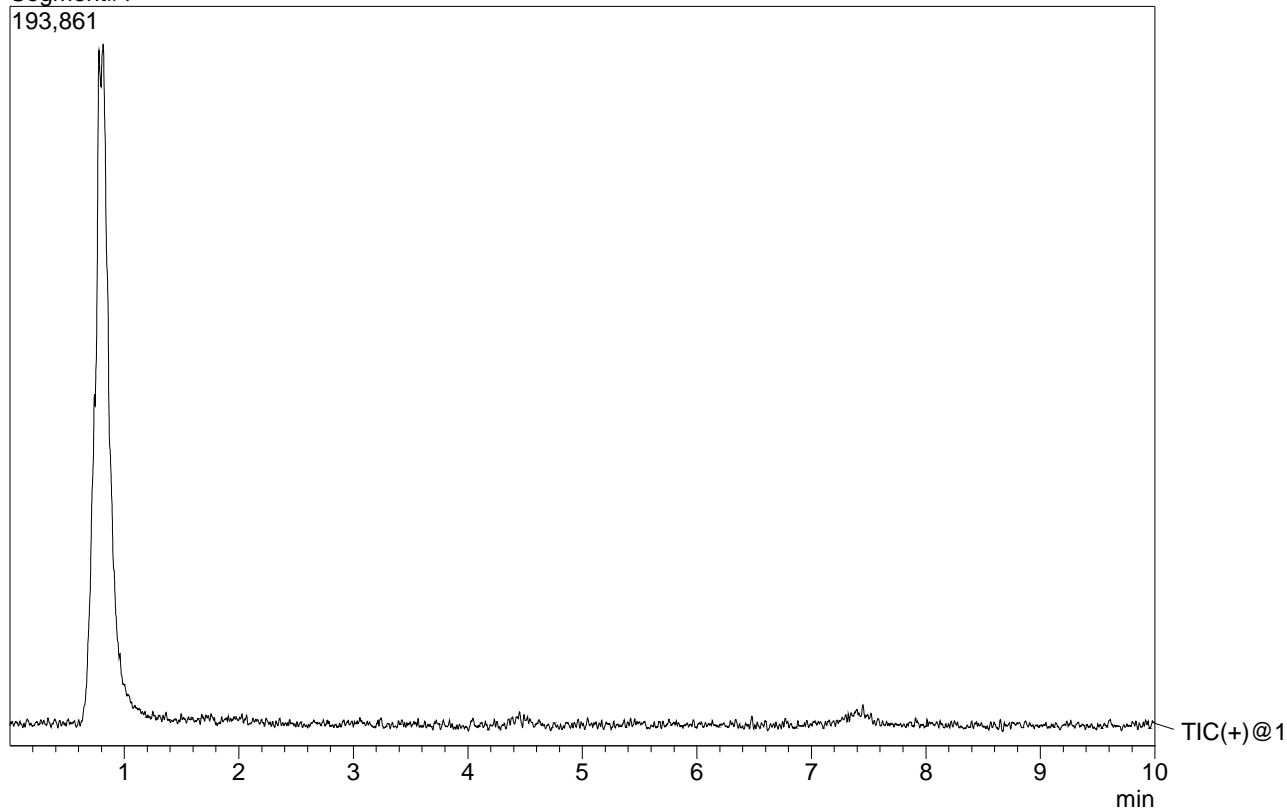

<Spectrum>

R.Time:----(Scan#:----)  
MassPeaks:526 BasePeak:693.15(36018)  
Spectrum Mode:Averaged 0.620-1.070(373-643)  
BG Mode:None Polarity:Positive Segment 1 - Event 1

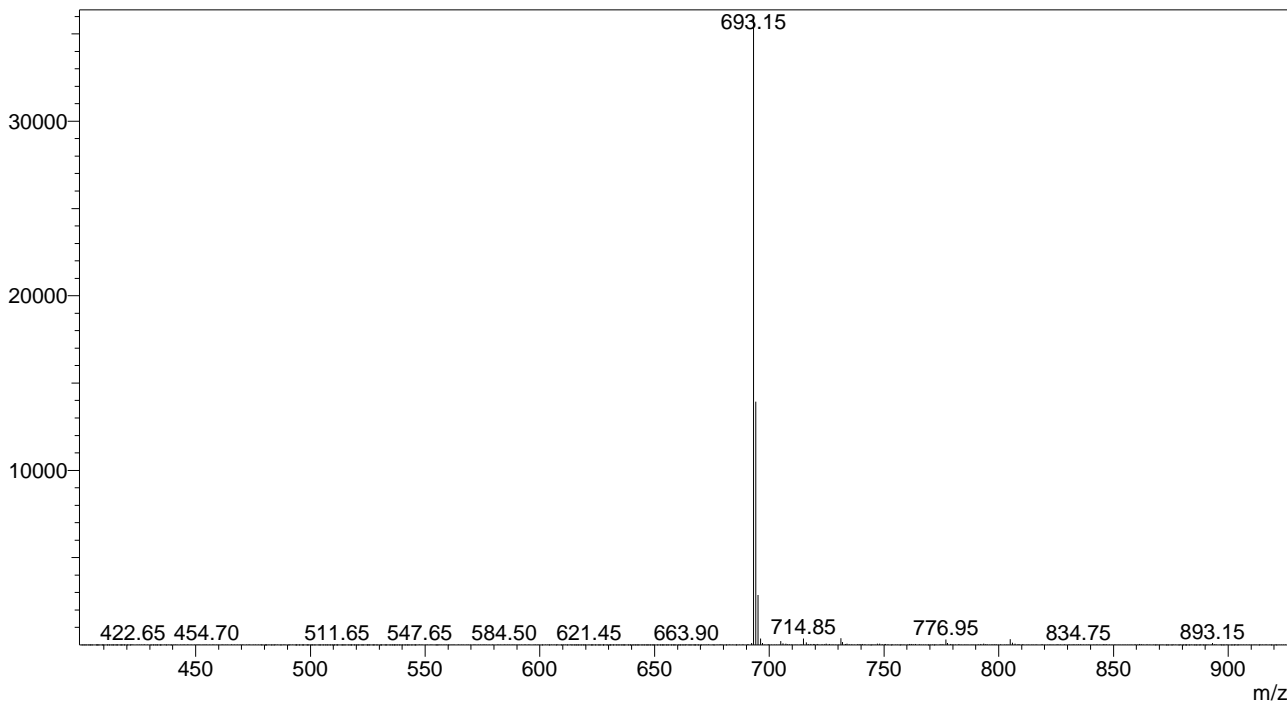

# Analysis Report

## <Sample Information>

Sample Name : CF\_04  
 Sample ID : CF\_004  
 Data Filename : CF\_Batch\_13\_6\_20\_6182020\_004.lcd  
 Method Filename : PDA\_6\_18\_20\_batch.lcm  
 Batch Filename : CF\_Batch\_13\_6\_20.lcb  
 Vial # : 1-4  
 Injection Volume : 5 uL  
 Date Acquired : 6/18/2020 10:25:45 AM  
 Date Processed : 6/18/2020 10:35:50 AM  
 Sample Type : Unknown  
 Acquired by : System Administrator  
 Processed by : System Administrator

## <Chromatogram>

mAU

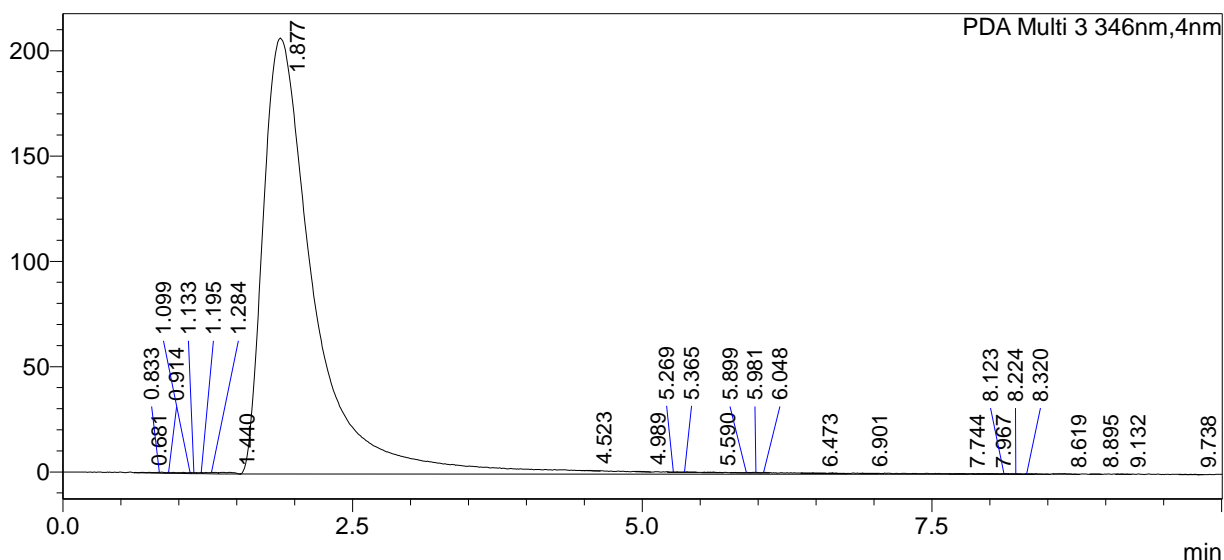

## <Peak Table>

PDA Ch3 346nm

| Peak# | Ret. Time | Area    | Height | Peak Purity Index    |
|-------|-----------|---------|--------|----------------------|
| 1     | 0.681     | 1819    | 291    | Cannot be calculated |
| 2     | 0.833     | 2143    | 415    | Cannot be calculated |
| 3     | 0.914     | 2311    | 380    | Cannot be calculated |
| 4     | 1.099     | 2607    | 459    | Cannot be calculated |
| 5     | 1.133     | 1144    | 544    | Cannot be calculated |
| 6     | 1.195     | 1584    | 570    | Cannot be calculated |
| 7     | 1.284     | 4610    | 652    | Cannot be calculated |
| 8     | 1.440     | 6041    | 733    | Cannot be calculated |
| 9     | 1.877     | 6423983 | 207033 | 0.999940             |
| 10    | 4.523     | 1142    | 135    | Cannot be calculated |
| 11    | 4.989     | 1077    | 222    | Cannot be calculated |
| 12    | 5.269     | 1078    | 251    | Cannot be calculated |
| 13    | 5.365     | 1524    | 280    | Cannot be calculated |
| 14    | 5.590     | 1684    | 290    | Cannot be calculated |
| 15    | 5.899     | 1143    | 261    | Cannot be calculated |
| 16    | 5.981     | 1201    | 310    | Cannot be calculated |
| 17    | 6.048     | 1172    | 250    | Cannot be calculated |
| 18    | 6.473     | 3643    | 279    | Cannot be calculated |
| 19    | 6.901     | 1605    | 290    | Cannot be calculated |
| 20    | 7.744     | 1182    | 213    | Cannot be calculated |
| 21    | 7.967     | 1199    | 246    | Cannot be calculated |
| 22    | 8.123     | 1576    | 218    | Cannot be calculated |

| Peak# | Ret. Time | Area    | Height | Peak Purity Index    |
|-------|-----------|---------|--------|----------------------|
| 23    | 8.224     | 1081    | 275    | Cannot be calculated |
| 24    | 8.320     | 1266    | 285    | Cannot be calculated |
| 25    | 8.619     | 1708    | 192    | Cannot be calculated |
| 26    | 8.895     | 1038    | 249    | Cannot be calculated |
| 27    | 9.132     | 1012    | 237    | Cannot be calculated |
| 28    | 9.738     | 1008    | 211    | Cannot be calculated |
| Total |           | 6472580 | 215771 |                      |

7.452  
7.237  
7.221  
7.187  
7.073  
7.056  
6.775

3.841  
3.805  
3.642  
3.507

1.656

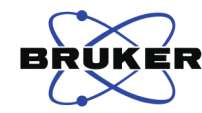

3e

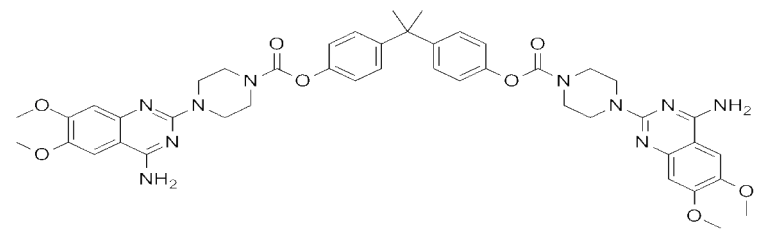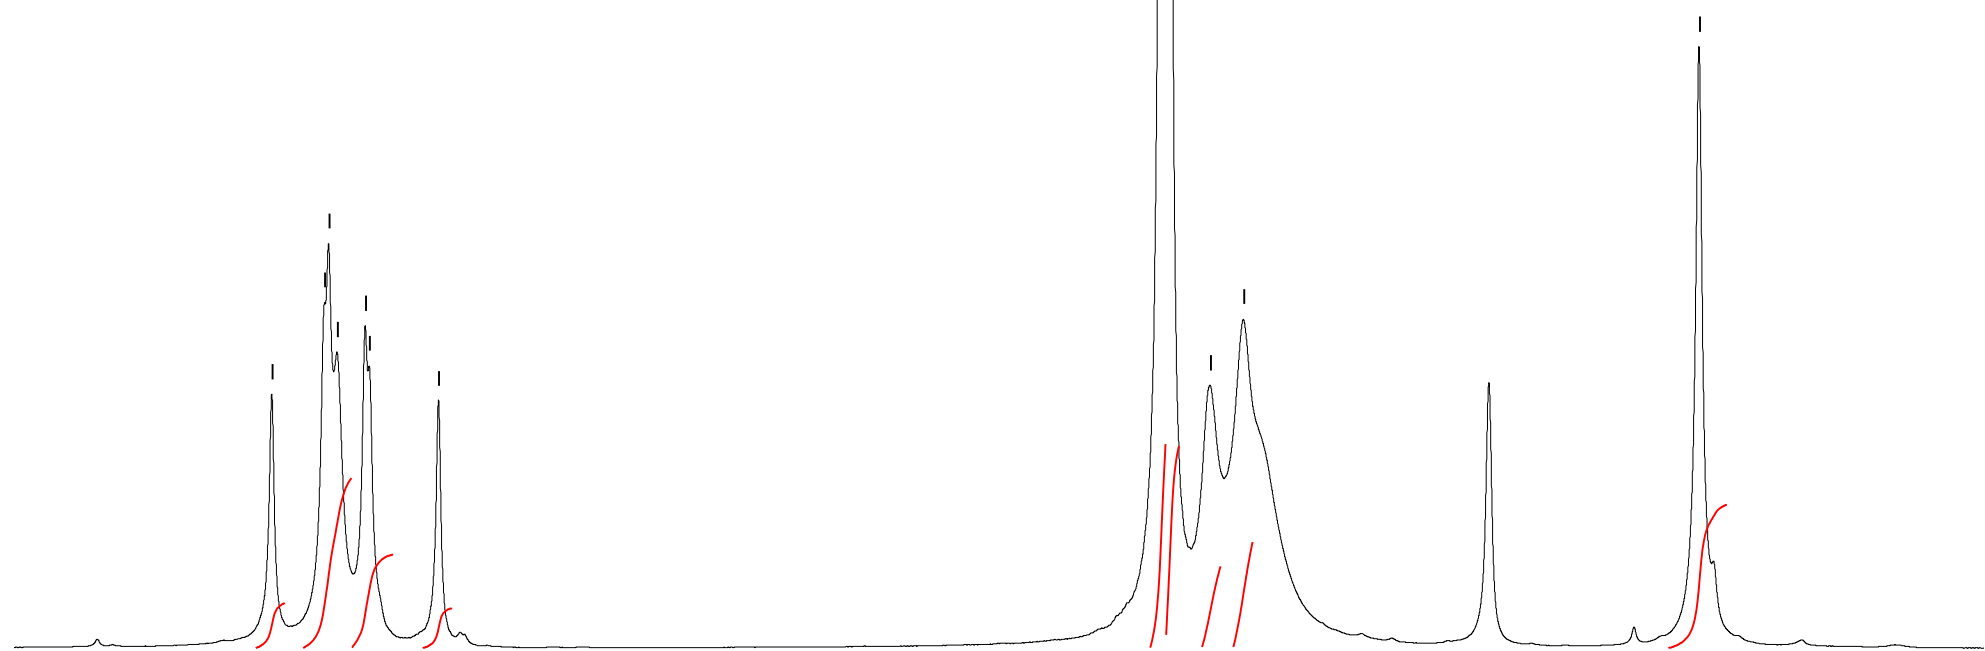

8.0 7.5 7.0 6.5 6.0 5.5 5.0 4.5 4.0 3.5 3.0 2.5 2.0 1.5 1.0 ppm

2.00  
7.52  
4.14  
1.77

9.00  
8.95  
3.63  
4.78

6.33

161.67  
158.68  
154.77  
153.61  
149.52  
149.09  
147.45  
145.58

127.75  
121.75

105.67  
104.23  
103.48

56.34  
55.91

44.67  
44.10  
43.78  
42.38

31.02

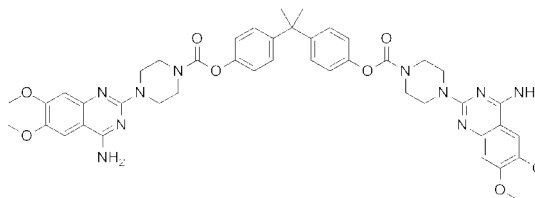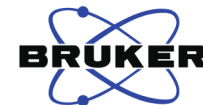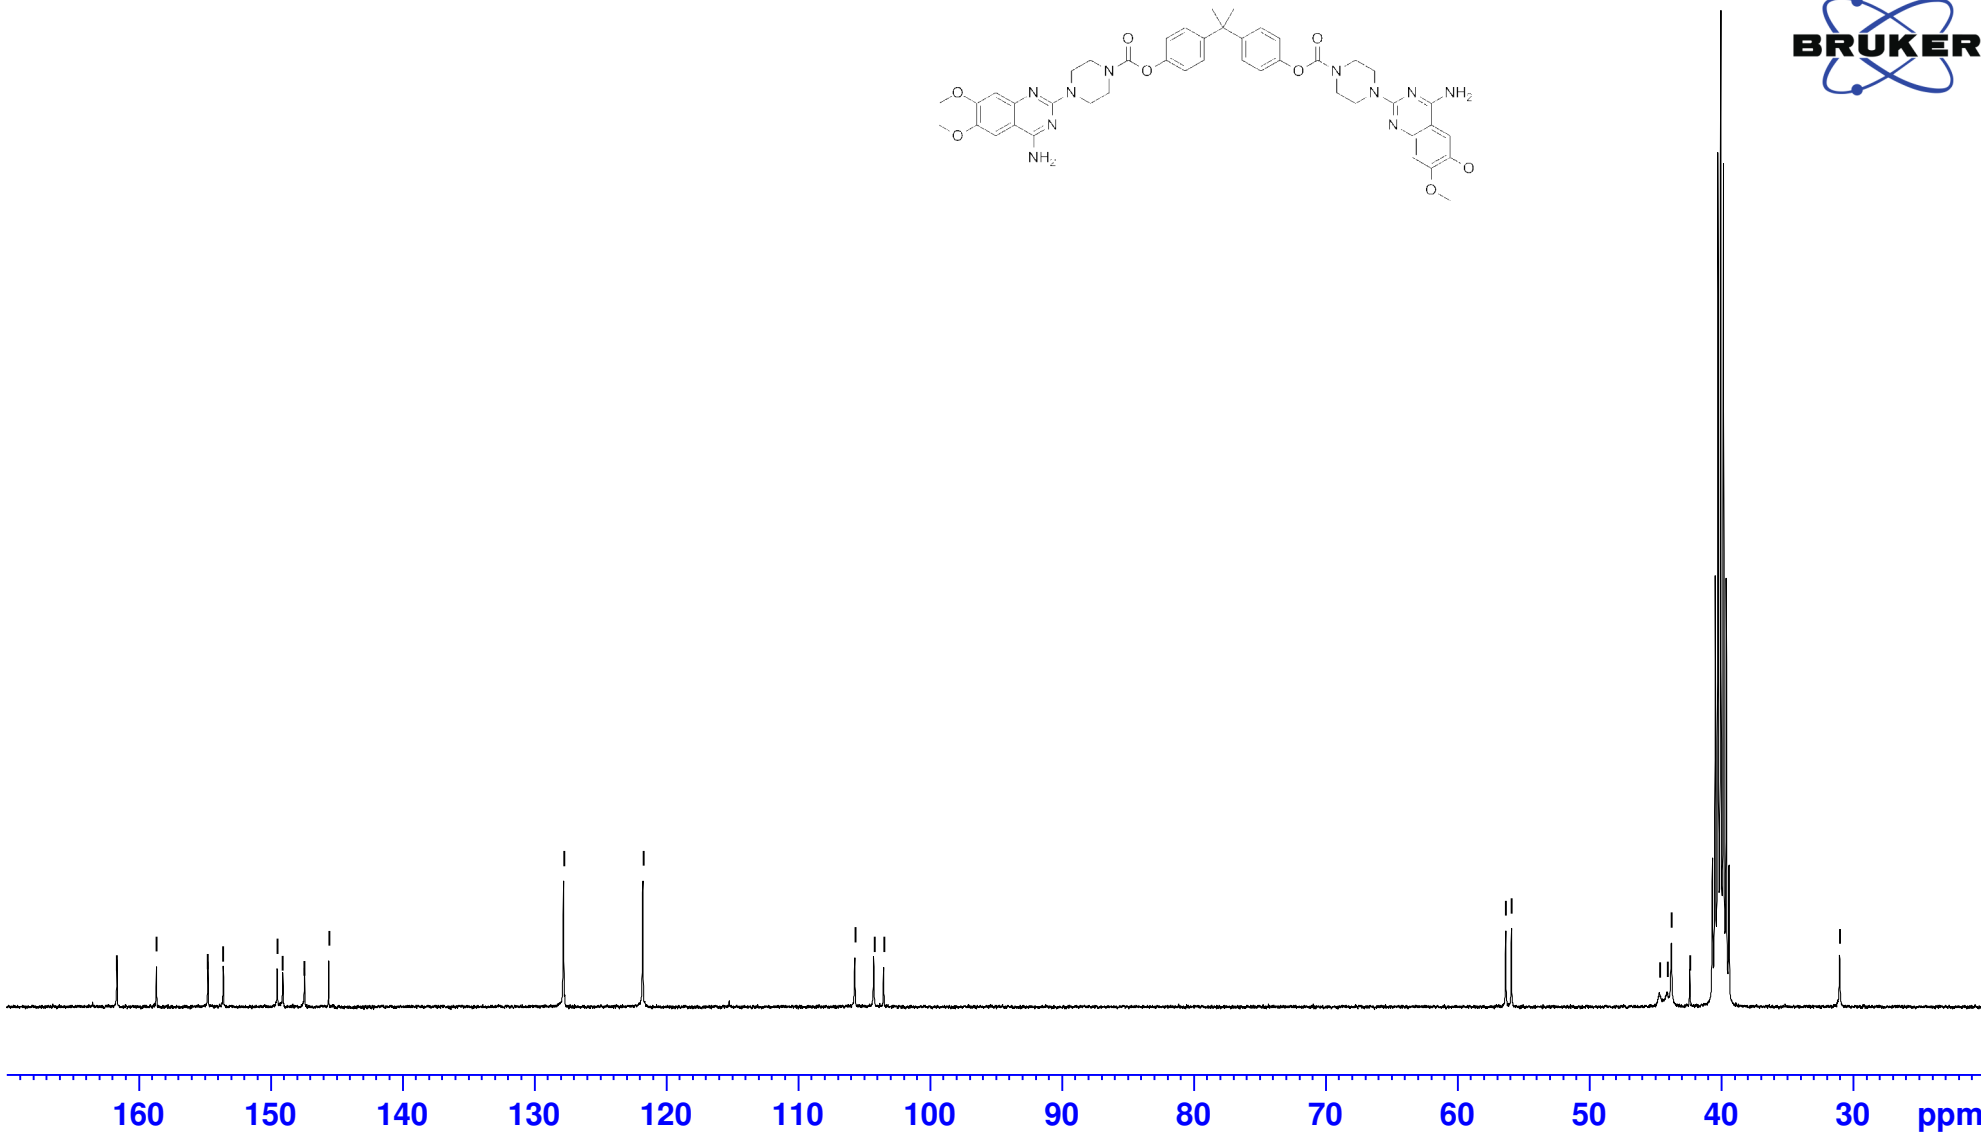

# ==== Shimadzu LabSolutions Data Report ====

Sample ID : 1                      Acquired                      1/4/2020 5:55:55 PM  
Data Filename : CF-F-05.lcd

<Chromatogram>

Segment#1

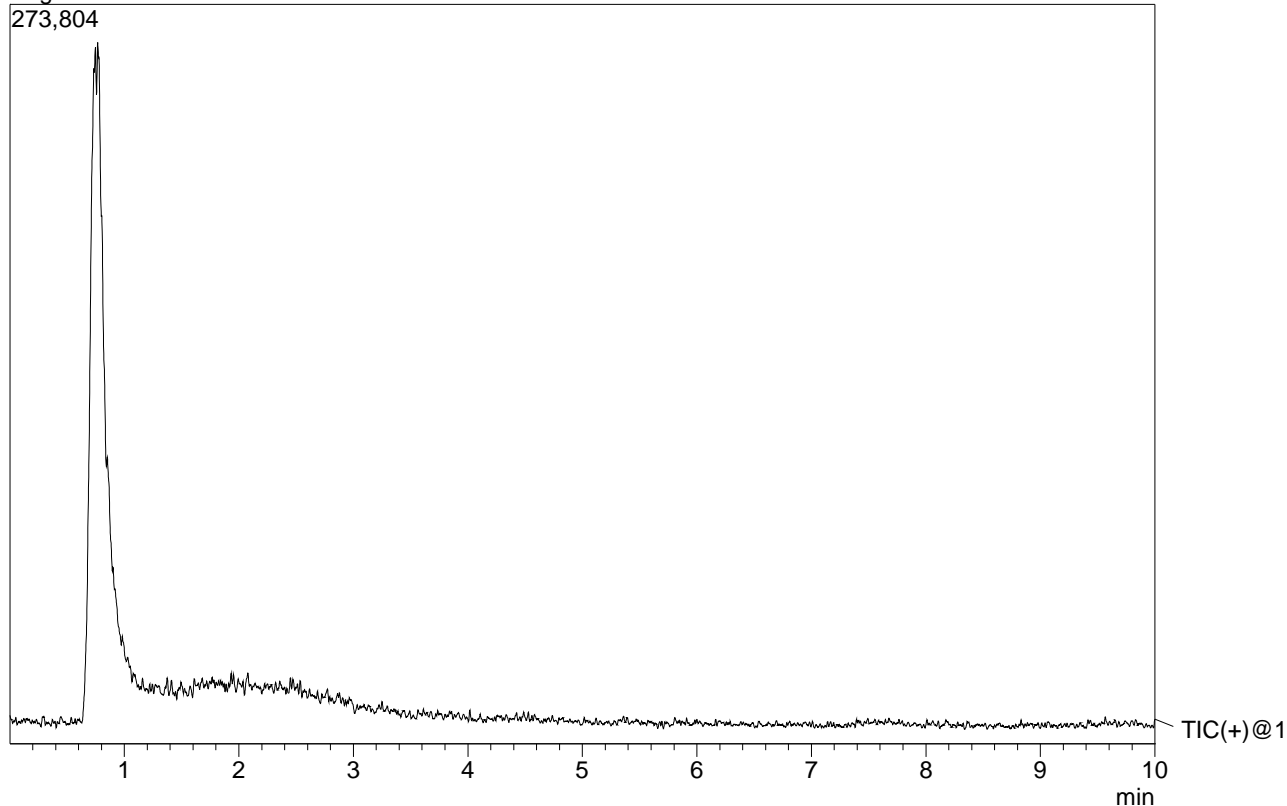

<Spectrum>

R.Time:----(Scan#:----)  
MassPeaks:526 BasePeak:859.15(48763)  
Spectrum Mode:Averaged 0.612-1.078(368-648)  
BG Mode:None Polarity:Positive Segment 1 - Event 1

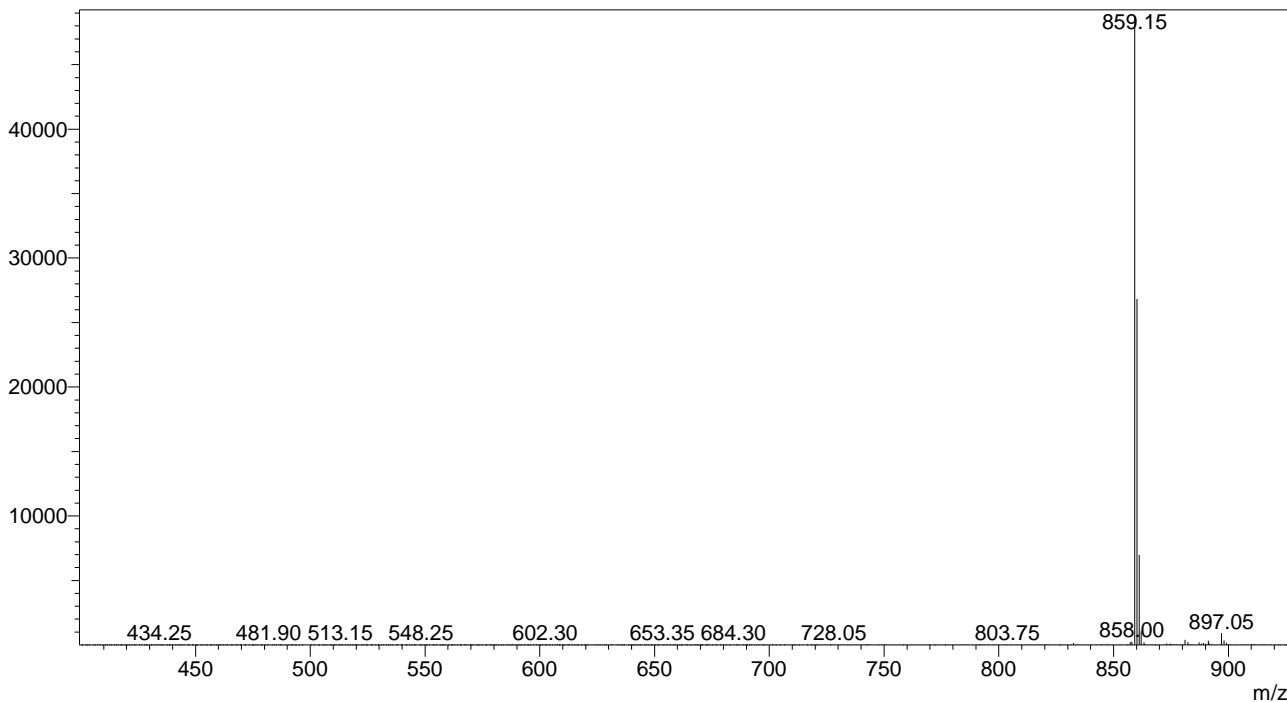





# Analysis Report

## <Sample Information>

Sample Name : CF\_05  
 Sample ID : CF\_005  
 Data Filename : CF\_Batch\_13\_6\_20\_6182020\_005.lcd  
 Method Filename : PDA\_6\_18\_20\_batch.lcm  
 Batch Filename : CF\_Batch\_13\_6\_20.lcb  
 Vial # : 1-5  
 Injection Volume : 5 uL  
 Date Acquired : 6/18/2020 10:36:14 AM  
 Date Processed : 6/18/2020 10:46:20 AM

Sample Type : Unknown  
 Acquired by : System Administrator  
 Processed by : System Administrator

## <Chromatogram>

mAU

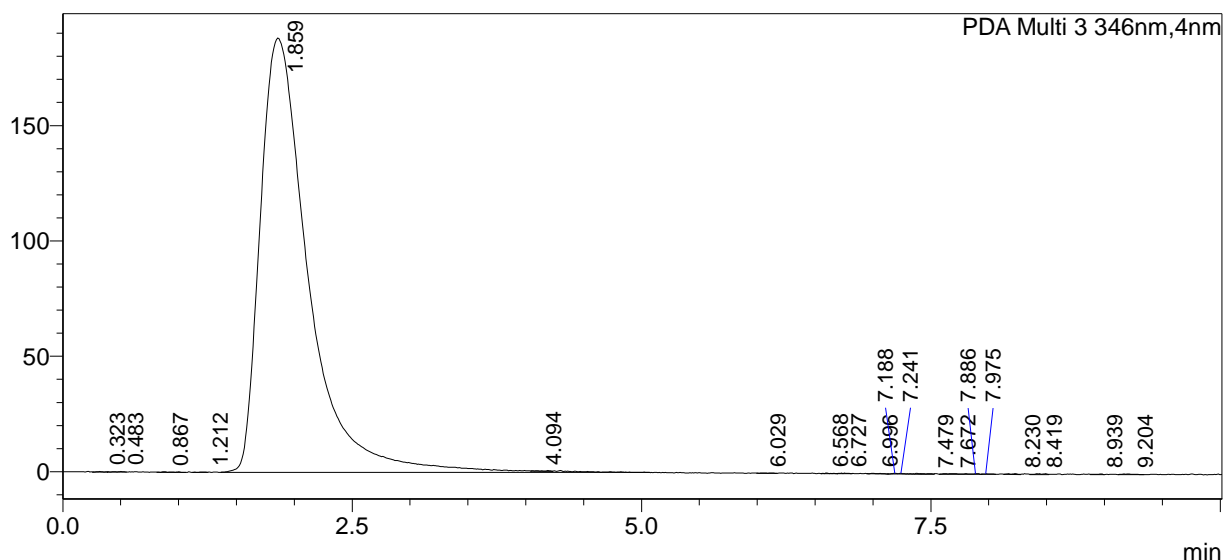

## <Peak Table>

PDA Ch3 346nm

| Peak# | Ret. Time | Area    | Height | Peak Purity Index    |
|-------|-----------|---------|--------|----------------------|
| 1     | 0.323     | 1097    | 286    | Cannot be calculated |
| 2     | 0.483     | 1414    | 226    | Cannot be calculated |
| 3     | 0.867     | 2195    | 279    | Cannot be calculated |
| 4     | 1.212     | 1042    | 205    | Cannot be calculated |
| 5     | 1.859     | 5446443 | 188232 | 0.996146             |
| 6     | 4.094     | 1665    | 185    | Cannot be calculated |
| 7     | 6.029     | 1710    | 236    | Cannot be calculated |
| 8     | 6.568     | 1039    | 118    | Cannot be calculated |
| 9     | 6.727     | 1125    | 240    | Cannot be calculated |
| 10    | 6.996     | 1037    | 250    | Cannot be calculated |
| 11    | 7.188     | 1118    | 349    | Cannot be calculated |
| 12    | 7.241     | 2361    | 316    | Cannot be calculated |
| 13    | 7.479     | 1548    | 284    | Cannot be calculated |
| 14    | 7.672     | 2354    | 329    | Cannot be calculated |
| 15    | 7.886     | 2364    | 265    | Cannot be calculated |
| 16    | 7.975     | 1215    | 258    | Cannot be calculated |
| 17    | 8.230     | 1465    | 293    | Cannot be calculated |
| 18    | 8.419     | 2069    | 340    | Cannot be calculated |
| 19    | 8.939     | 1194    | 187    | Cannot be calculated |
| 20    | 9.204     | 2126    | 307    | Cannot be calculated |
| Total |           | 5476582 | 193185 |                      |

7.450  
7.305  
7.284  
7.178  
7.063  
7.042  
6.772

3f

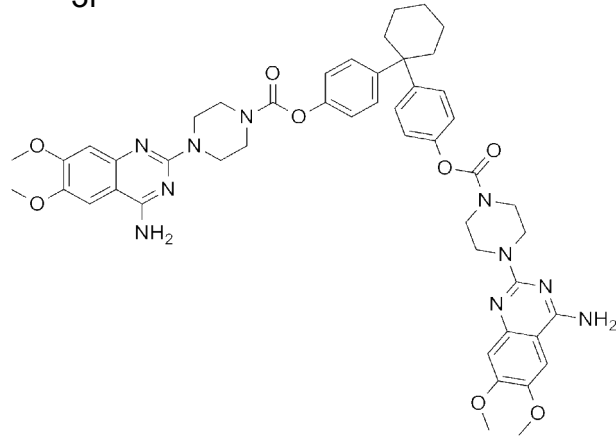

3.842  
3.802  
3.628  
3.503

2.252

1.468

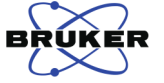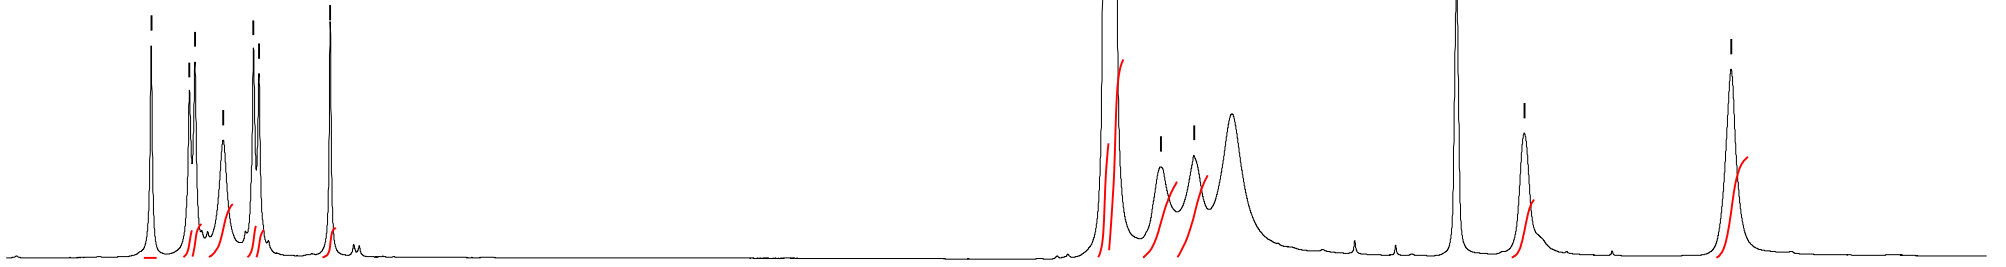

0.00  
2.10  
2.48  
4.00  
2.51  
2.10  
2.21

8.45  
14.77  
5.68  
6.14

4.30

7.48

7.5 7.0 6.5 6.0 5.5 5.0 4.5 4.0 3.5 3.0 2.5 2.0 1.5 1.0 ppm

161.66  
158.64  
154.78  
153.56  
149.26  
149.04  
145.59  
145.42

128.04  
121.91  
115.47

105.64  
104.24  
103.47

56.35  
55.92

45.52  
44.64  
43.78

36.80

26.17  
22.97

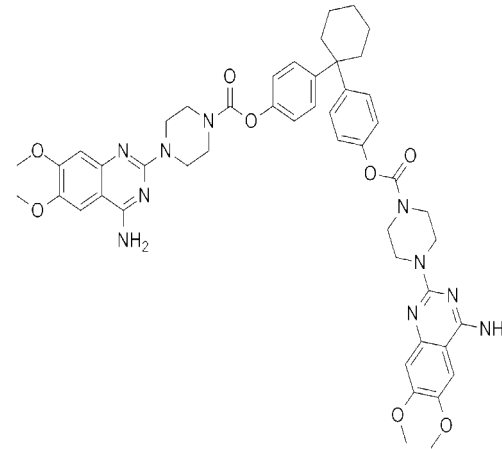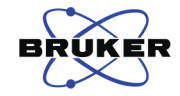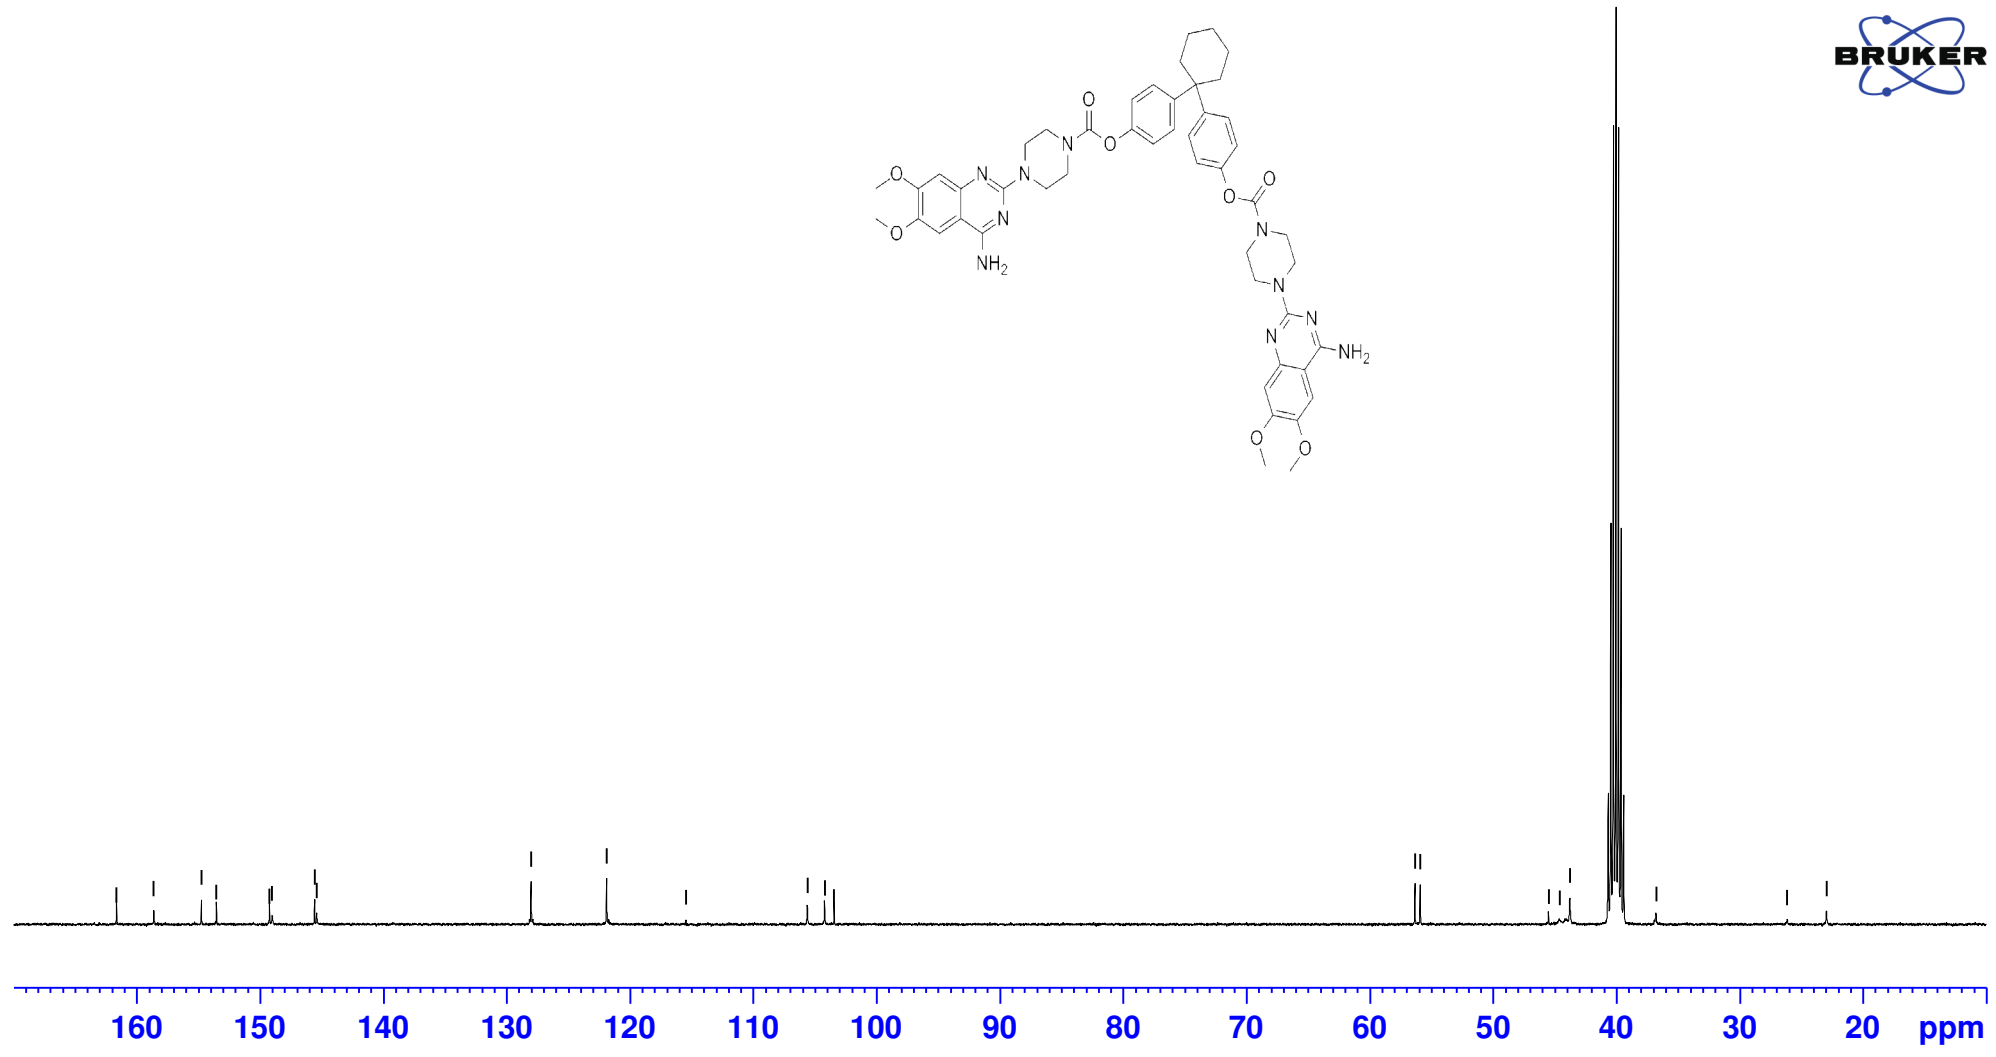

# ==== Shimadzu LabSolutions Data Report ====

Sample ID : 1                      Acquired                      1/10/2020 12:12:56 AM  
Data Filename : CF-F-06.lcd

## <Chromatogram>

Segment#1

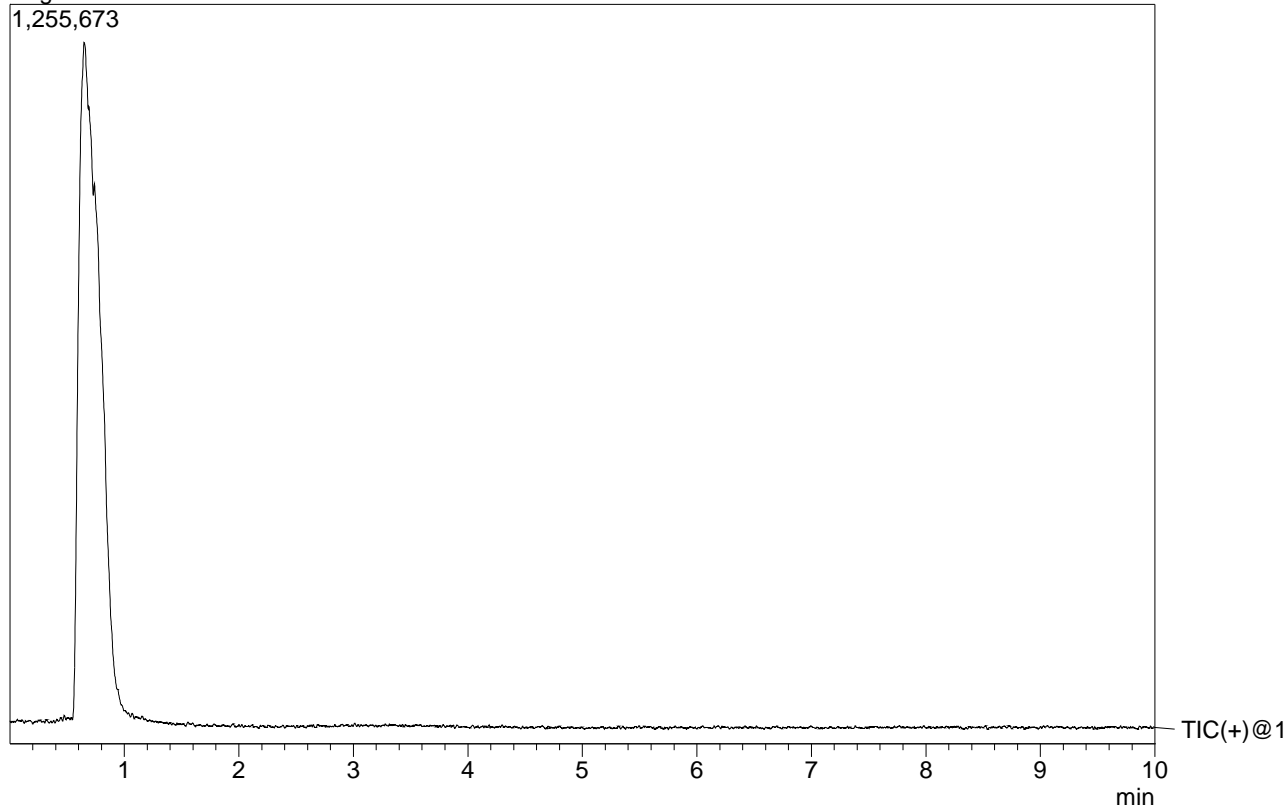

## <Spectrum>

R.Time:----(Scan#:----)  
MassPeaks:401    BasePeak:899.25(175107)  
Spectrum Mode:Averaged 0.530-0.998(319-600)  
BG Mode:None    Polarity:Positive    Segment 1 - Event 1

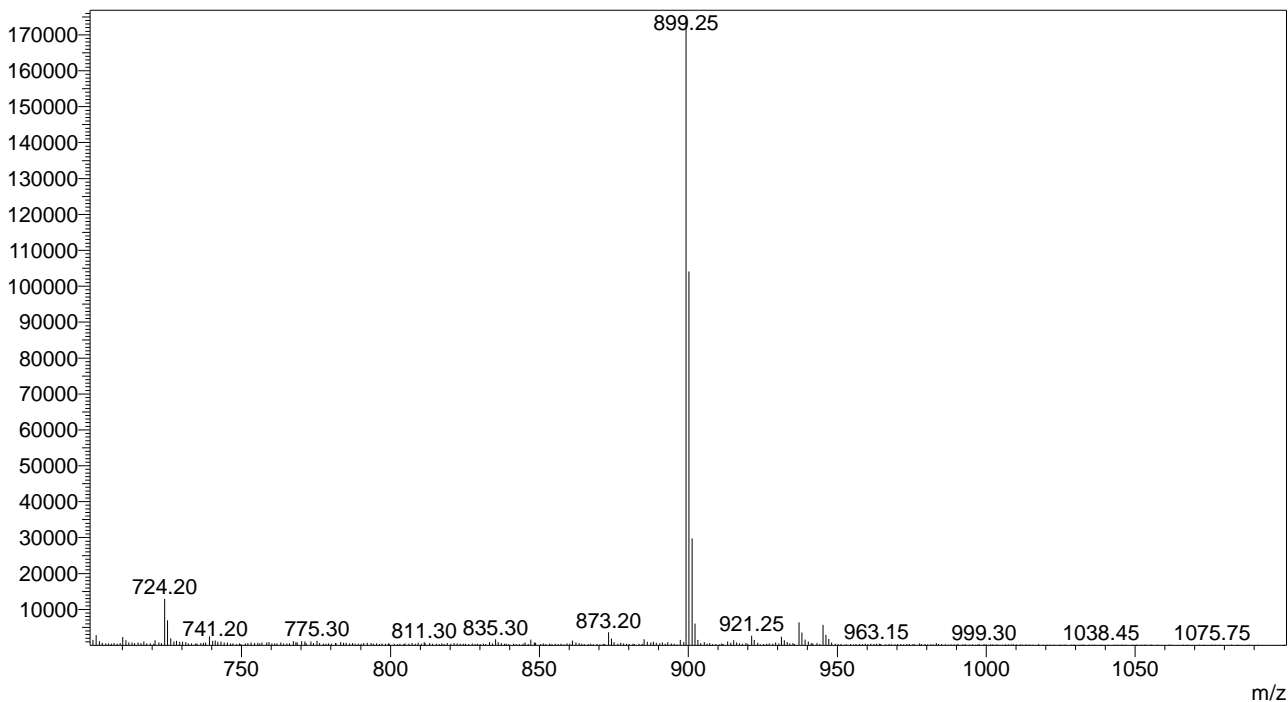

# Analysis Report

## <Sample Information>

Sample Name : CF\_06  
 Sample ID : CF\_006  
 Data Filename : CF\_Batch\_13\_6\_20\_6182020\_006.lcd  
 Method Filename : PDA\_6\_18\_20\_batch.lcm  
 Batch Filename : CF\_Batch\_13\_6\_20.lcb  
 Vial # : 1-6  
 Injection Volume : 5 uL  
 Date Acquired : 6/18/2020 10:57:14 AM  
 Date Processed : 6/18/2020 11:07:20 AM  
 Sample Type : Unknown  
 Acquired by : System Administrator  
 Processed by : System Administrator

## <Chromatogram>

mAU

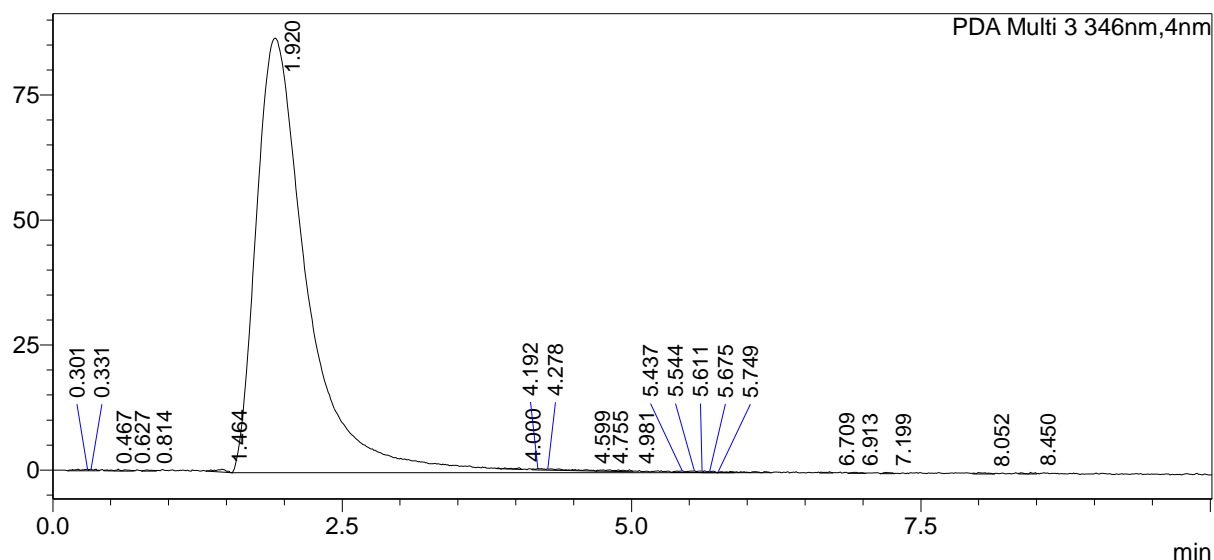

## <Peak Table>

PDA Ch3 346nm

| Peak# | Ret. Time | Area    | Height | Peak Purity Index    |
|-------|-----------|---------|--------|----------------------|
| 1     | 0.301     | 2293    | 305    | Cannot be calculated |
| 2     | 0.331     | 1217    | 307    | Cannot be calculated |
| 3     | 0.467     | 1401    | 204    | Cannot be calculated |
| 4     | 0.627     | 1069    | 259    | Cannot be calculated |
| 5     | 0.814     | 1186    | 220    | Cannot be calculated |
| 6     | 1.464     | 3620    | 553    | Cannot be calculated |
| 7     | 1.920     | 2679047 | 86885  | 0.907121             |
| 8     | 4.000     | 1476    | 186    | Cannot be calculated |
| 9     | 4.192     | 1304    | 255    | Cannot be calculated |
| 10    | 4.278     | 1711    | 248    | Cannot be calculated |
| 11    | 4.599     | 1881    | 196    | Cannot be calculated |
| 12    | 4.755     | 1722    | 257    | Cannot be calculated |
| 13    | 4.981     | 1988    | 334    | Cannot be calculated |
| 14    | 5.437     | 1531    | 310    | Cannot be calculated |
| 15    | 5.544     | 1317    | 327    | Cannot be calculated |
| 16    | 5.611     | 1033    | 313    | Cannot be calculated |
| 17    | 5.675     | 1511    | 281    | Cannot be calculated |
| 18    | 5.749     | 1326    | 151    | Cannot be calculated |
| 19    | 6.709     | 1079    | 251    | Cannot be calculated |
| 20    | 6.913     | 1139    | 199    | Cannot be calculated |
| 21    | 7.199     | 1133    | 279    | Cannot be calculated |
| 22    | 8.052     | 1506    | 259    | Cannot be calculated |

| Peak# | Ret. Time | Area    | Height | Peak Purity Index    |
|-------|-----------|---------|--------|----------------------|
| 23    | 8.450     | 1354    | 280    | cannot be calculated |
| Total |           | 2712843 | 92858  |                      |

8.319  
8.299  
8.248  
8.228  
8.130  
8.109  
7.736  
7.716  
7.470  
7.452  
7.237  
7.188  
6.763  
6.748

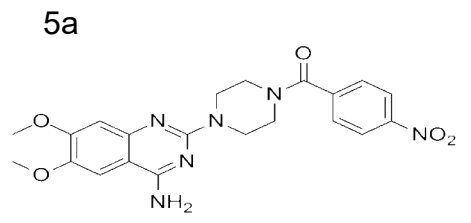

3.935  
3.834  
3.796  
3.726  
3.123

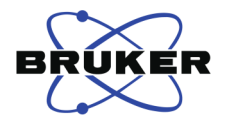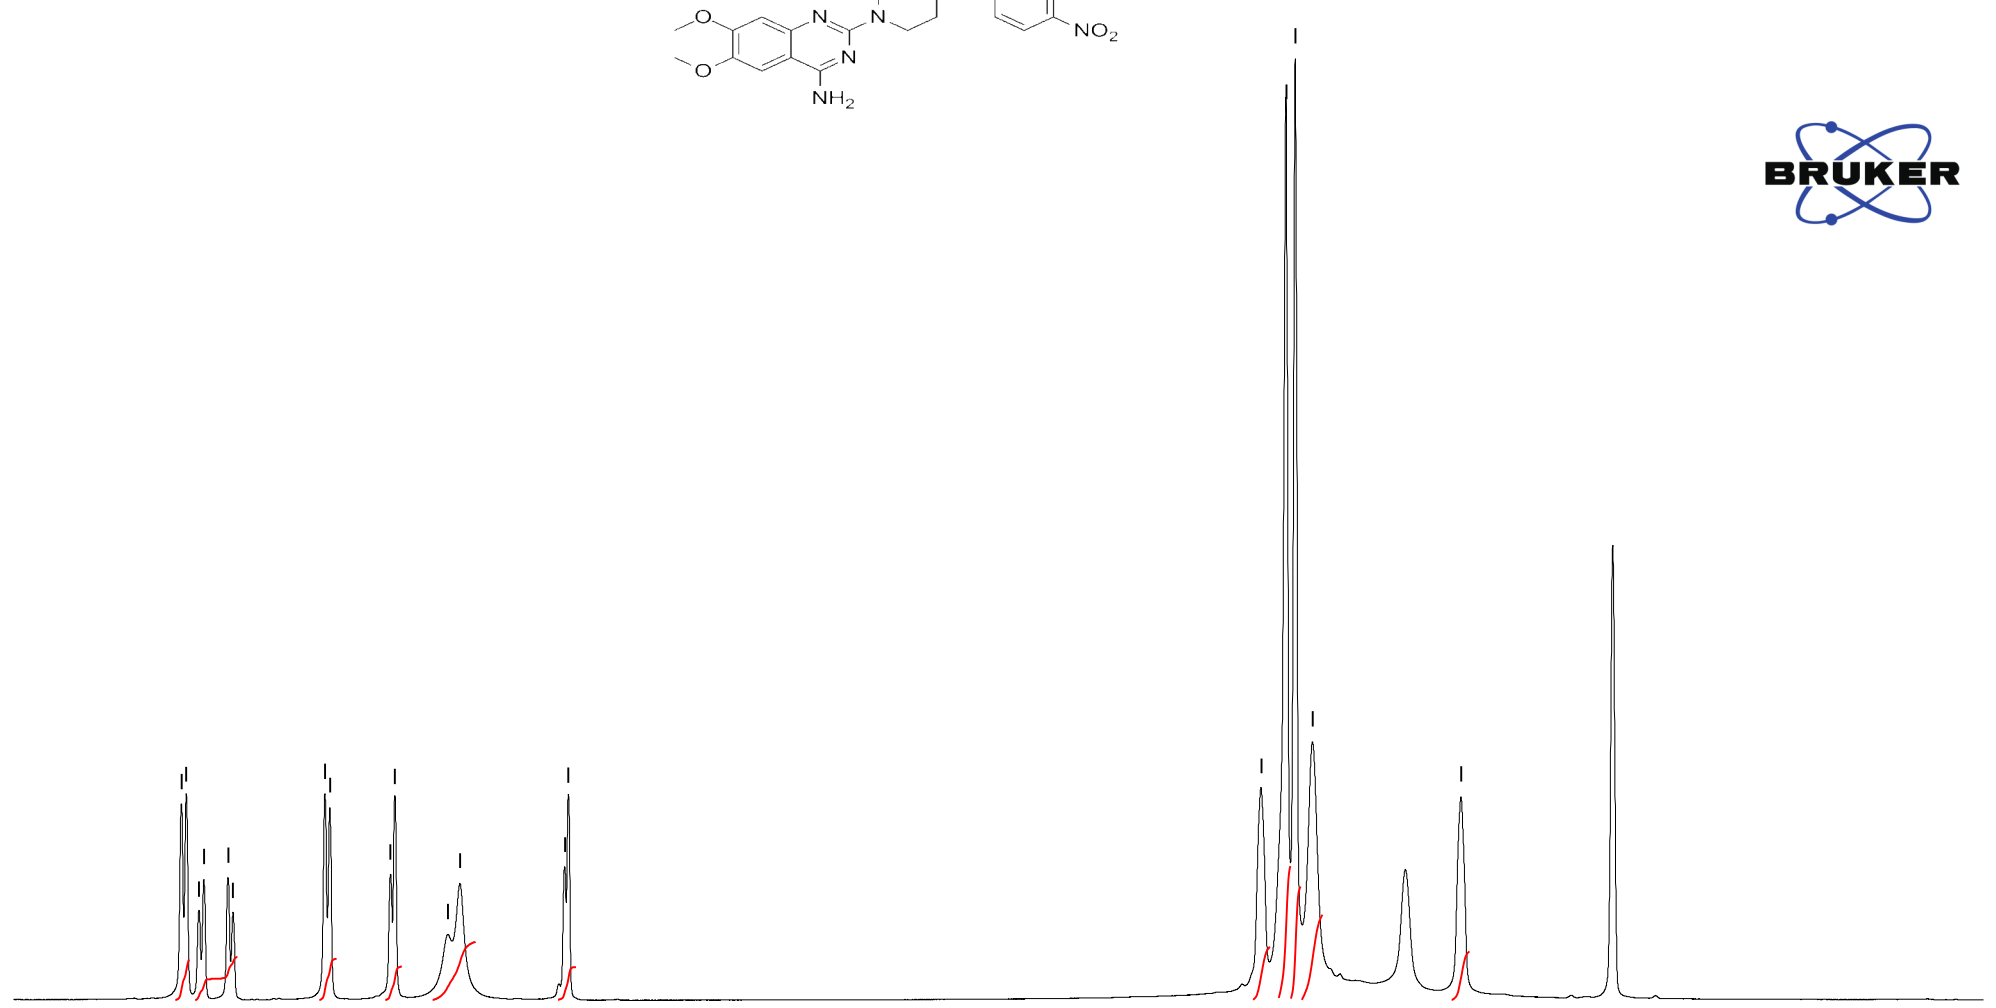

1.25  
1.31  
1.25  
1.02  
1.77  
1.00  
1.61  
4.09  
3.49  
2.61  
1.48

8.5 8.0 7.5 7.0 6.5 6.0 5.5 5.0 4.5 4.0 3.5 3.0 2.5 2.0 1.5 ppm

167.73  
167.39  
161.74  
161.65  
158.66  
158.35  
154.78  
154.73  
149.38  
149.05  
148.95  
148.29  
145.78  
145.58  
142.80

130.77  
128.86  
124.25  
123.64

105.70  
105.64  
104.19  
103.61  
103.48

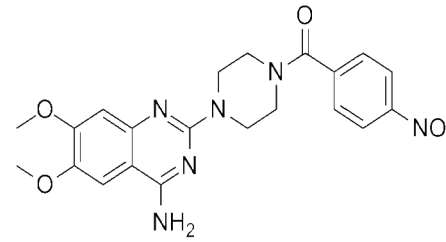

56.33  
55.90

47.43  
44.22  
43.77  
43.08  
42.16  
41.36

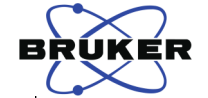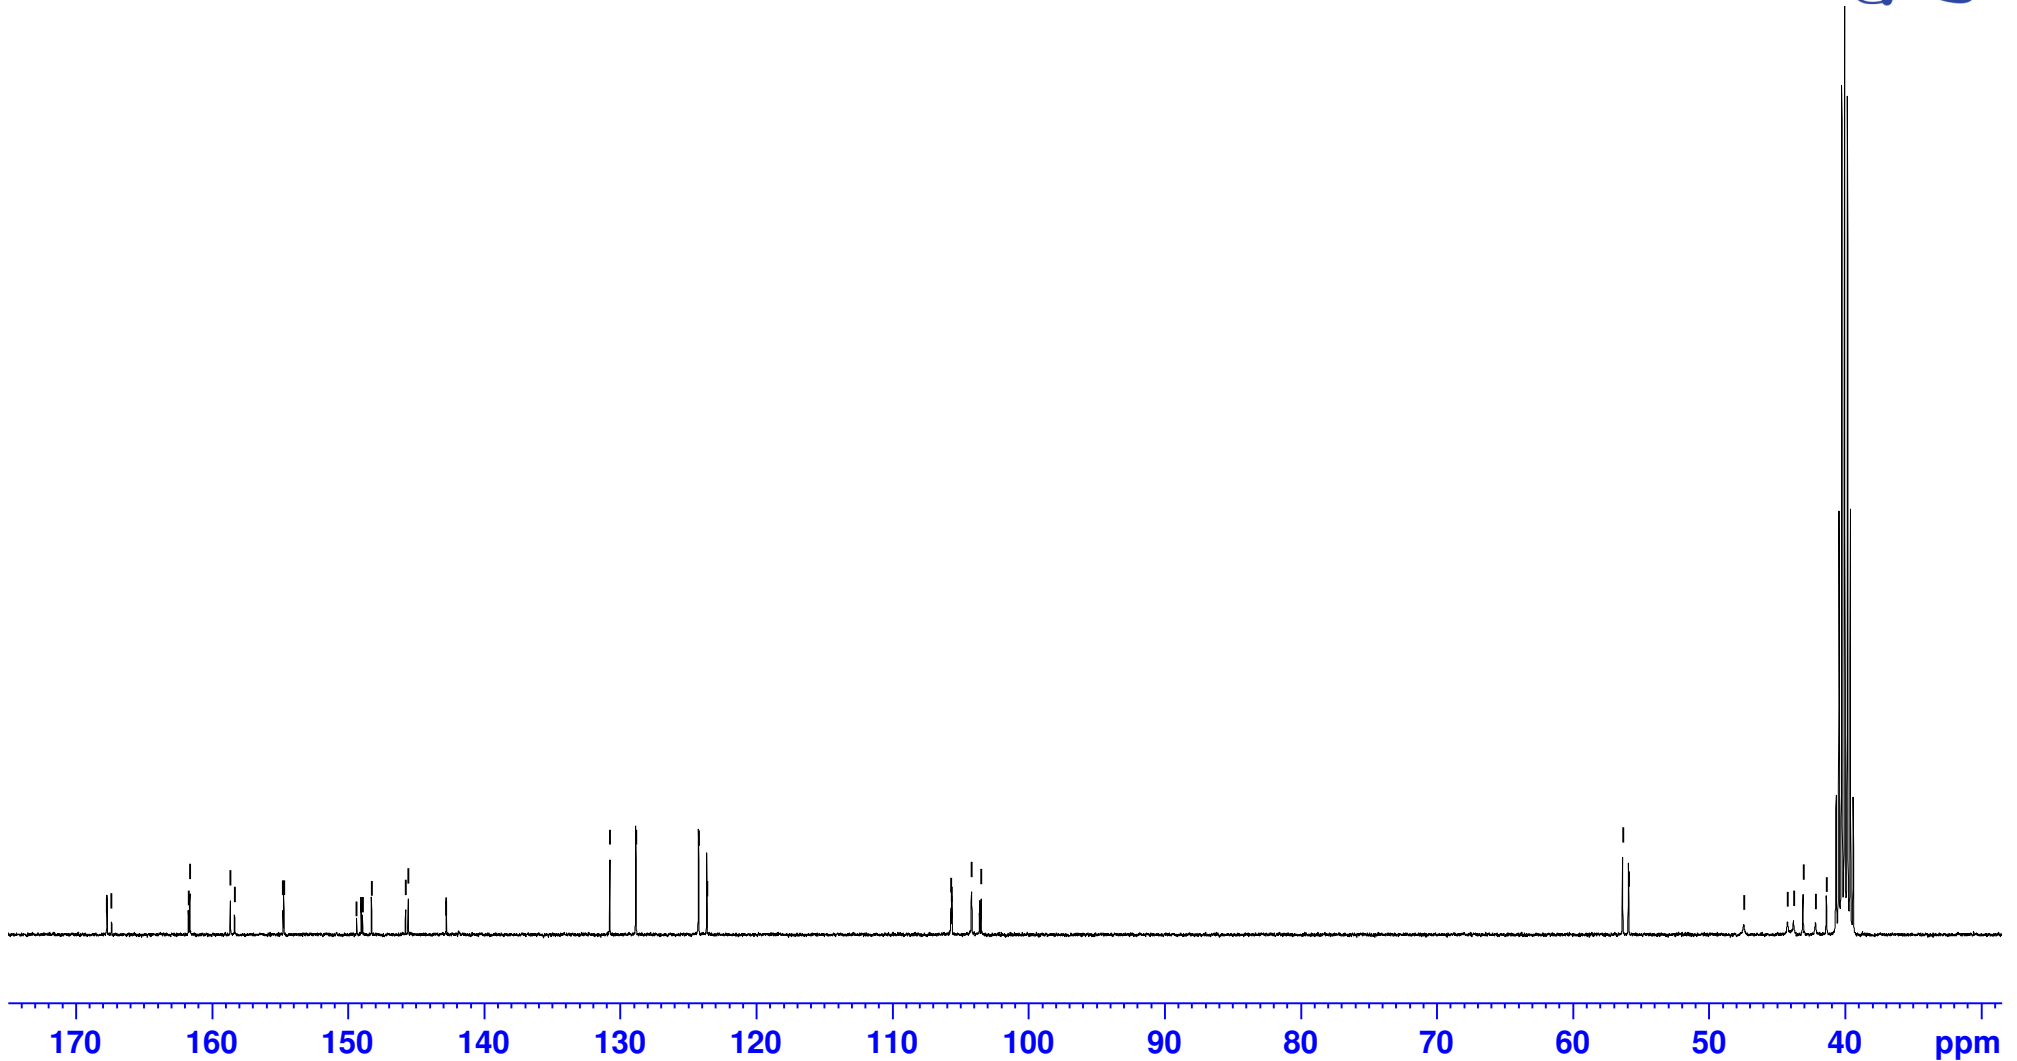



# ==== Shimadzu LabSolutions Data Report ====

Sample ID : 1                      Acquired                      12/23/2019 1:45:37 PM  
Data Filename : CF-F-20.lcd

<Chromatogram>

Segment#1

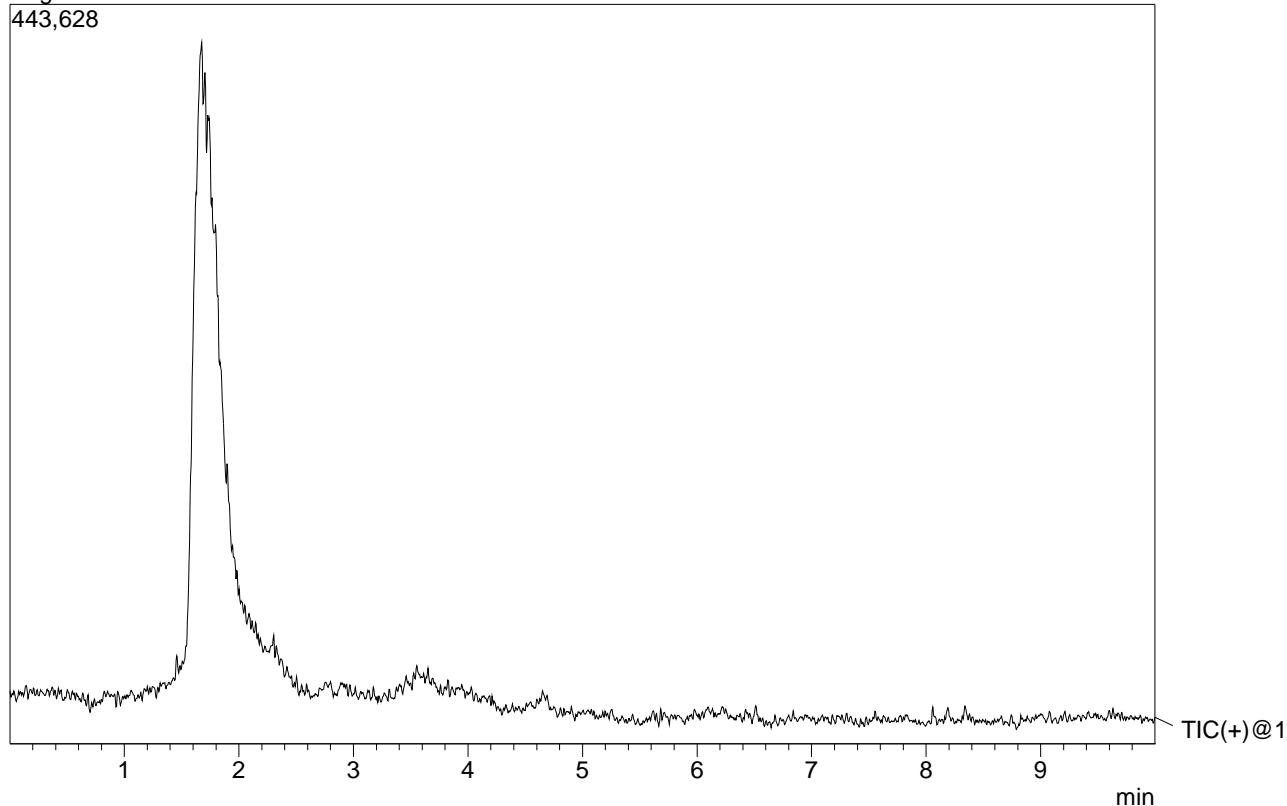

<Spectrum>

R.Time:----(Scan#:----)  
MassPeaks:701 BasePeak:439.15(67232)  
Spectrum Mode:Averaged 1.509-2.121(432-607)  
BG Mode:None Polarity:Positive Segment 1 - Event 1

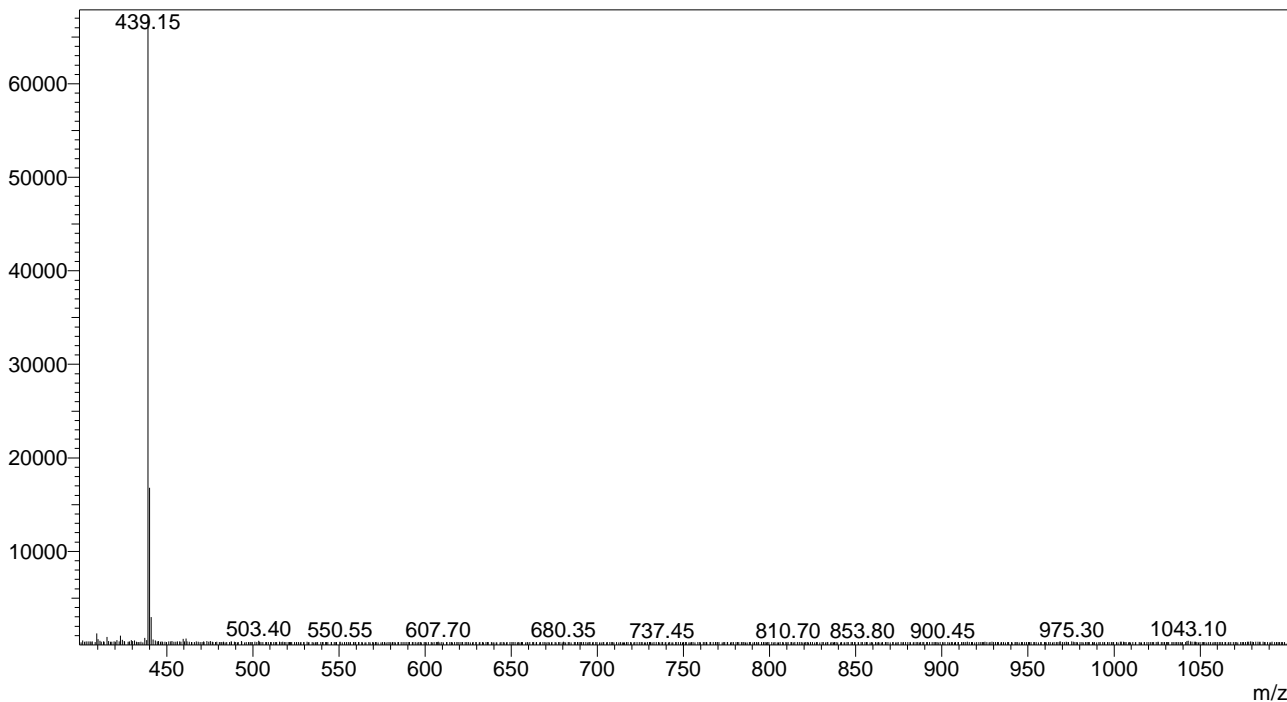



# Analysis Report

## <Sample Information>

Sample Name : CF\_20  
 Sample ID : CF\_020  
 Data Filename : CF\_Batch\_13\_6\_20\_6182020\_020.lcd  
 Method Filename : PDA\_6\_18\_20\_batch.lcm  
 Batch Filename : CF\_Batch\_13\_6\_20.lcb  
 Vial # : 1-20  
 Injection Volume : 5 uL  
 Date Acquired : 6/18/2020 1:56:09 PM  
 Date Processed : 6/18/2020 2:06:16 PM  
 Sample Type : Unknown  
 Acquired by : System Administrator  
 Processed by : System Administrator

## <Chromatogram>

mAU

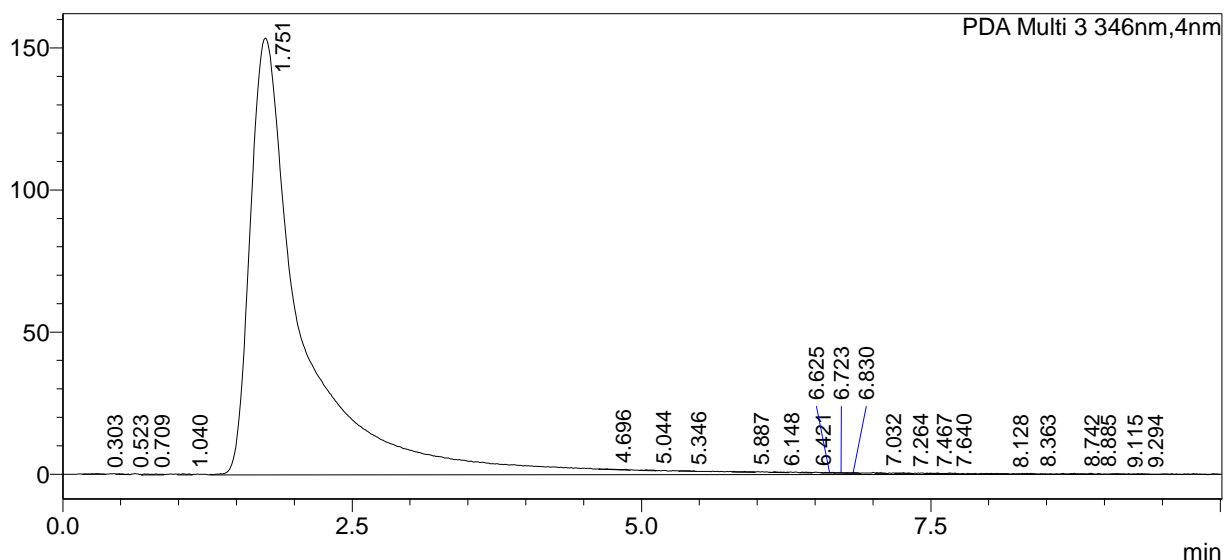

## <Peak Table>

PDA Ch3 346nm

| Peak# | Ret. Time | Area    | Height | Peak Purity Index    |
|-------|-----------|---------|--------|----------------------|
| 1     | 0.303     | 1571    | 269    | Cannot be calculated |
| 2     | 0.523     | 1050    | 219    | Cannot be calculated |
| 3     | 0.709     | 2518    | 329    | Cannot be calculated |
| 4     | 1.040     | 1758    | 344    | Cannot be calculated |
| 5     | 1.751     | 4951895 | 153673 | 0.999712             |
| 6     | 4.696     | 2179    | 192    | Cannot be calculated |
| 7     | 5.044     | 1344    | 289    | Cannot be calculated |
| 8     | 5.346     | 1341    | 198    | Cannot be calculated |
| 9     | 5.887     | 1508    | 191    | Cannot be calculated |
| 10    | 6.148     | 1342    | 264    | Cannot be calculated |
| 11    | 6.421     | 1222    | 311    | Cannot be calculated |
| 12    | 6.625     | 1210    | 224    | Cannot be calculated |
| 13    | 6.723     | 1181    | 250    | Cannot be calculated |
| 14    | 6.830     | 1424    | 296    | Cannot be calculated |
| 15    | 7.032     | 1233    | 294    | Cannot be calculated |
| 16    | 7.264     | 1783    | 341    | Cannot be calculated |
| 17    | 7.467     | 1513    | 218    | Cannot be calculated |
| 18    | 7.640     | 1232    | 189    | Cannot be calculated |
| 19    | 8.128     | 1371    | 165    | Cannot be calculated |
| 20    | 8.363     | 1032    | 242    | Cannot be calculated |
| 21    | 8.742     | 1533    | 289    | Cannot be calculated |
| 22    | 8.885     | 1044    | 301    | Cannot be calculated |

| Peak# | Ret. Time | Area    | Height | Peak Purity Index    |
|-------|-----------|---------|--------|----------------------|
| 23    | 9.115     | 1213    | 234    | cannot be calculated |
| 24    | 9.294     | 1351    | 241    | cannot be calculated |
| Total |           | 4984846 | 159562 |                      |

8.335  
8.330  
8.315  
8.310  
8.265  
7.923  
7.904  
7.788  
7.769  
7.749  
7.444  
7.150

6.747

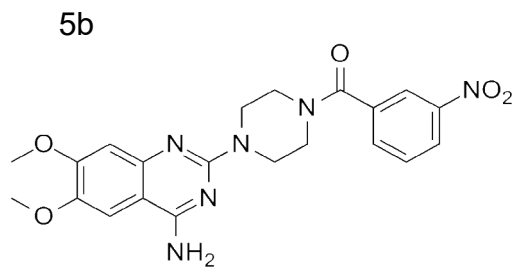

3.837  
3.800  
3.743  
3.617  
3.601  
3.585  
3.337

2.508

1.773  
1.764  
1.757  
1.749  
1.740

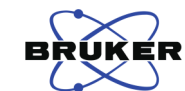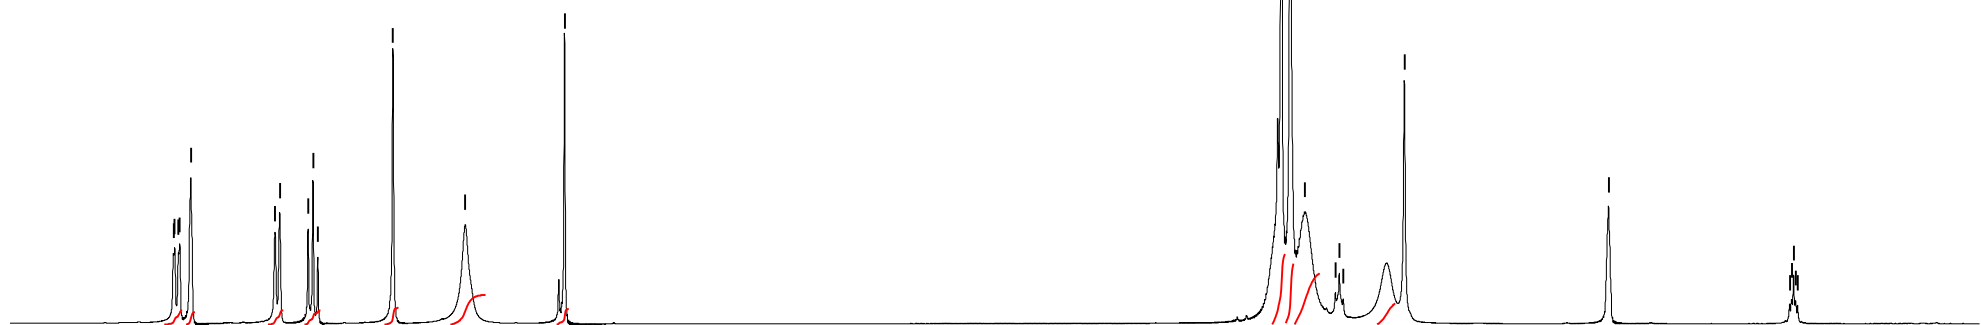

8.5

8.0

7.5

7.0

6.5

6.0

5.5

5.0

4.5

4.0

3.5

3.0

2.5

2.0

1.5

ppm

0.86  
0.74

0.86  
0.85

1.00

1.80

0.94

4.25  
3.76

3.09  
1.28

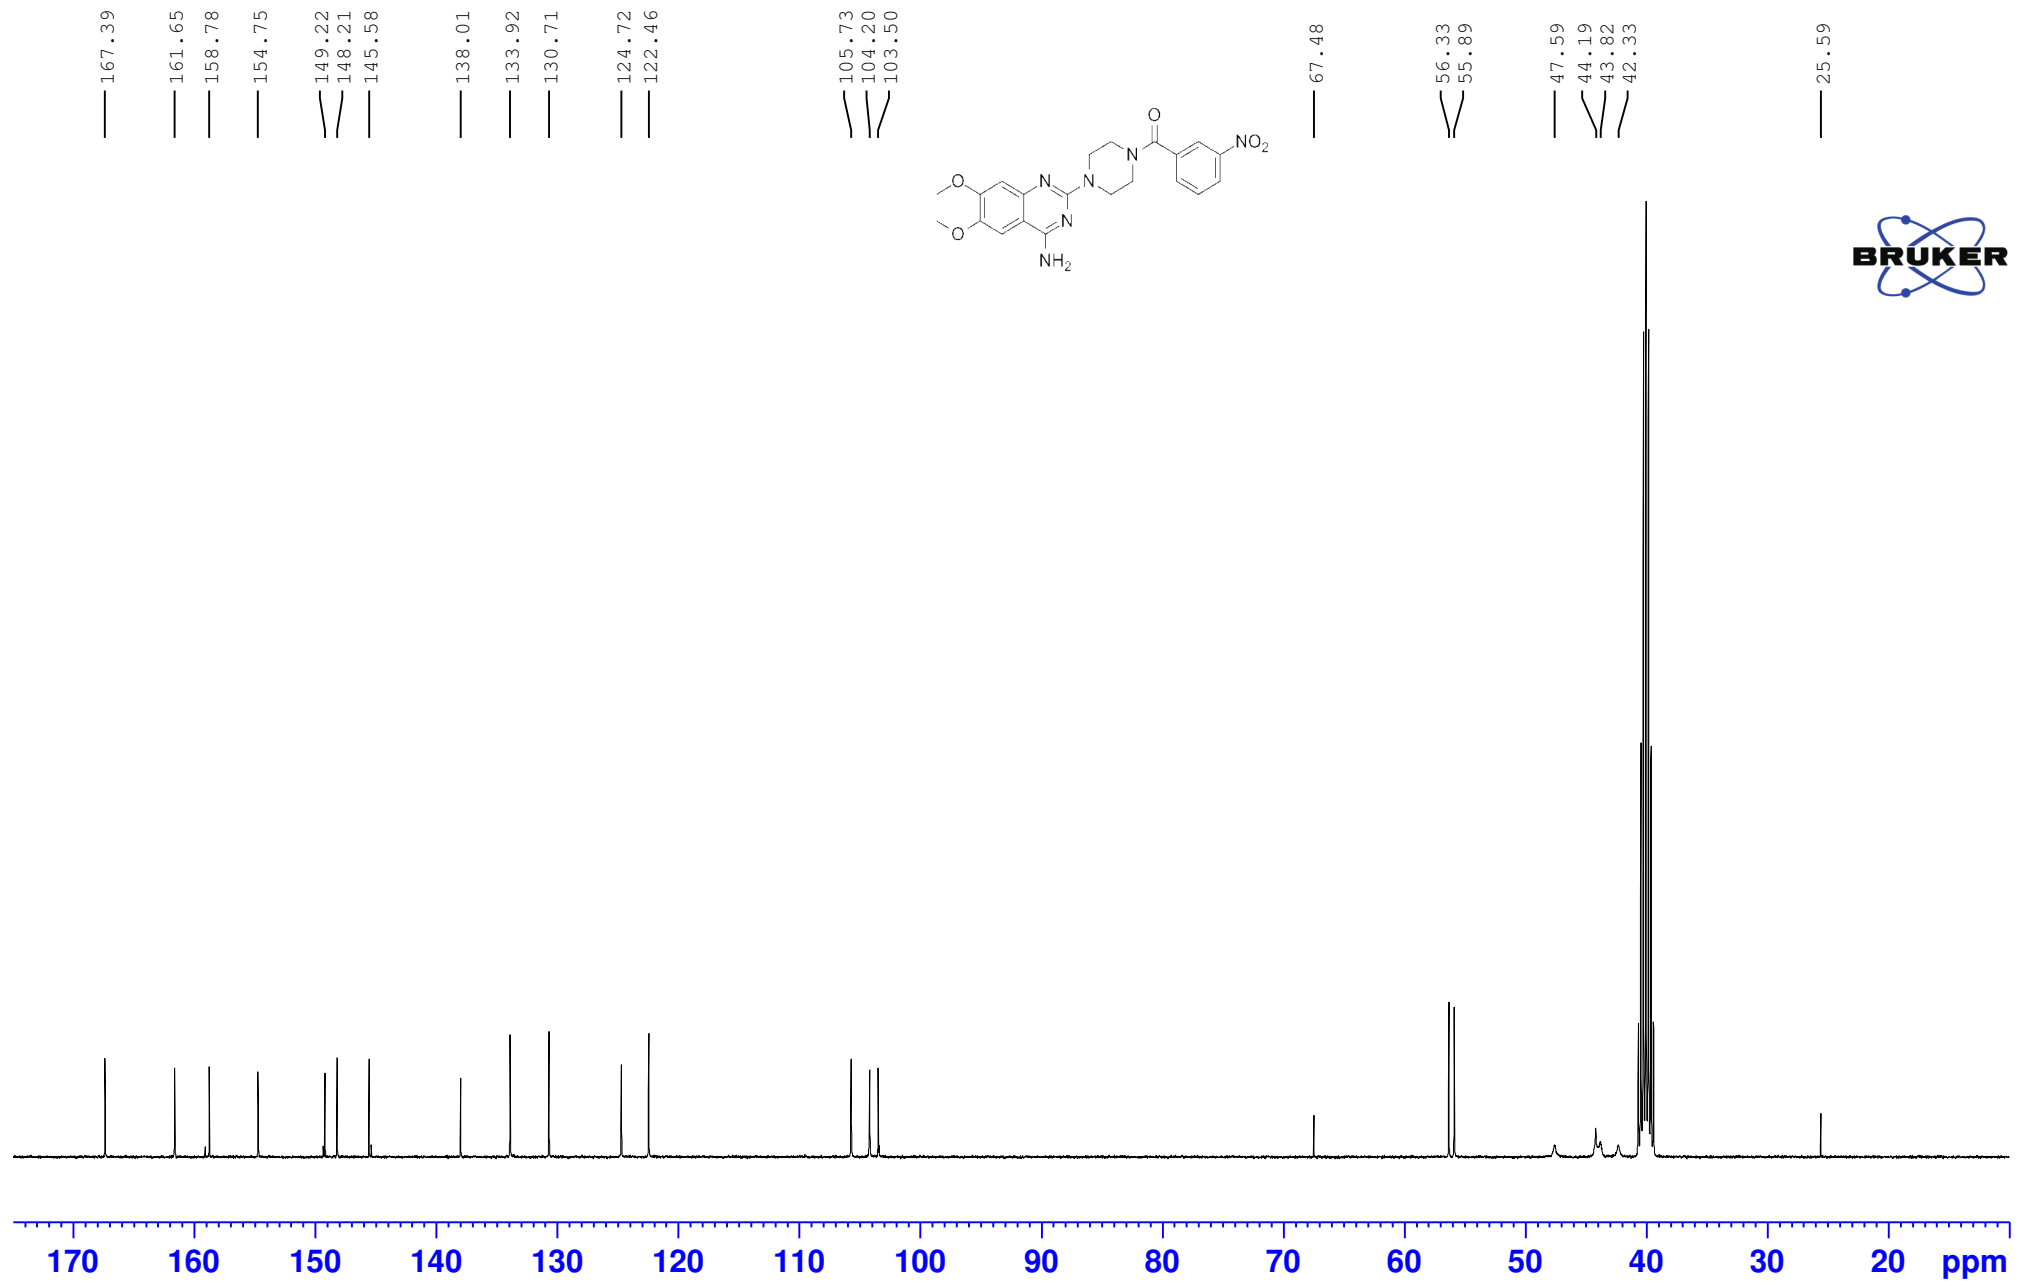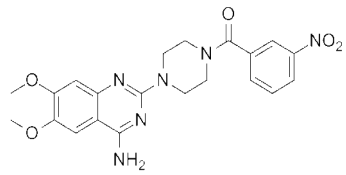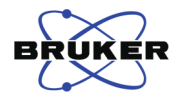

# ==== Shimadzu LabSolutions Data Report ====

Sample ID : 1                      Acquired                      12/20/2019 2:17:34 PM  
Data Filename : CF-F-07.lcd

## <Chromatogram>

Segment#1

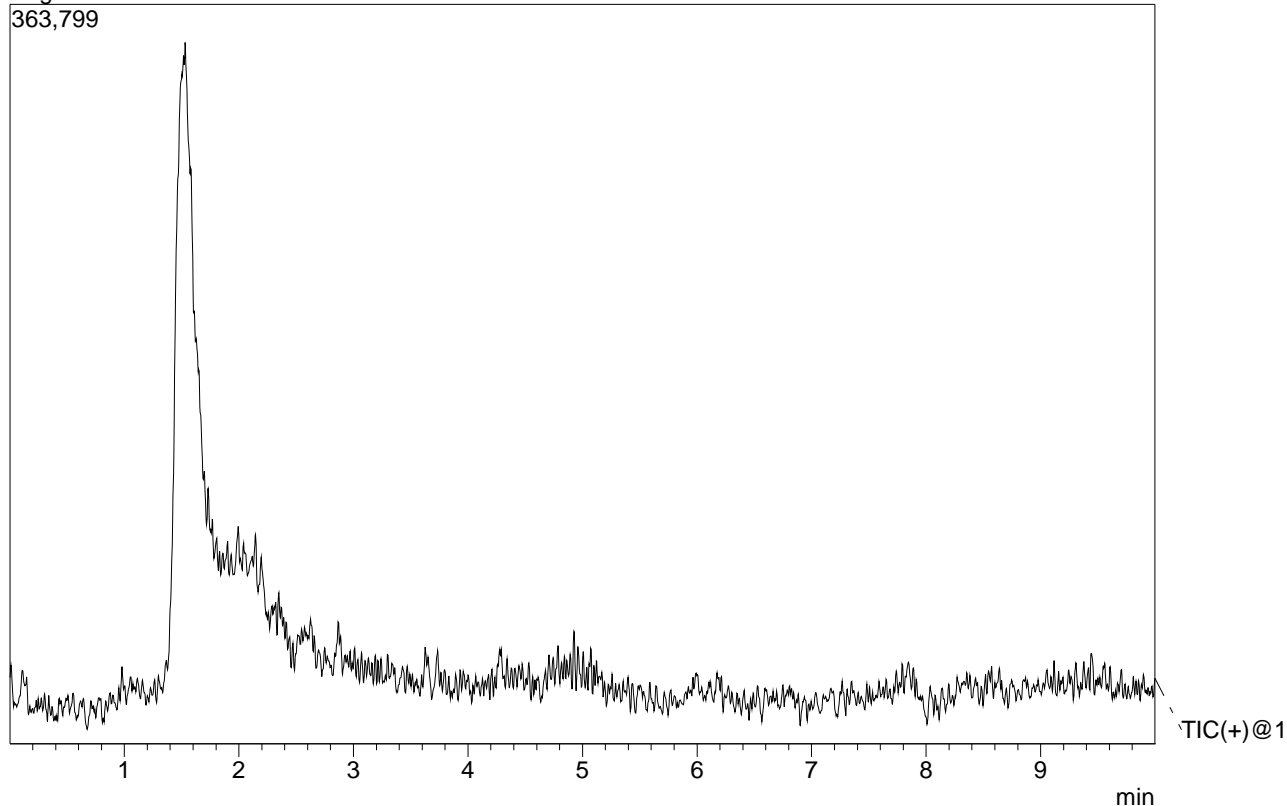

## <Spectrum>

R.Time:----(Scan#:----)  
MassPeaks:726 BasePeak:439.10(32929)  
Spectrum Mode:Averaged 1.358-1.880(389-538)  
BG Mode:None Polarity:Positive Segment 1 - Event 1

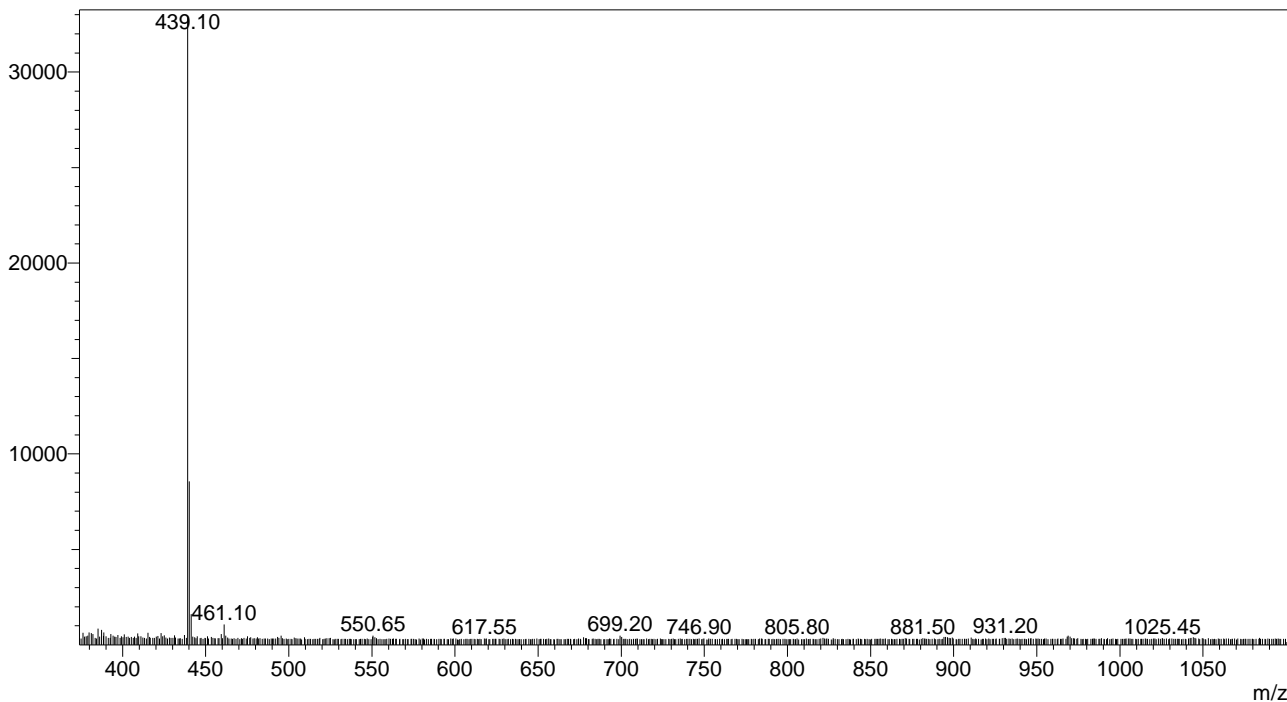

## <Sample Information>

Sample Name : CF\_07  
 Sample ID : CF\_007  
 Data Filename : CF\_Batch\_13\_6\_20\_6182020\_007.lcd  
 Method Filename : PDA\_6\_18\_20\_batch.lcm  
 Batch Filename : CF\_Batch\_13\_6\_20.lcb  
 Vial # : 1-7  
 Injection Volume : 5 uL  
 Date Acquired : 6/18/2020 11:08:10 AM  
 Date Processed : 6/18/2020 11:18:15 AM

Sample Type : Unknown  
 Acquired by : System Administrator  
 Processed by : System Administrator

## <Chromatogram>

mAU

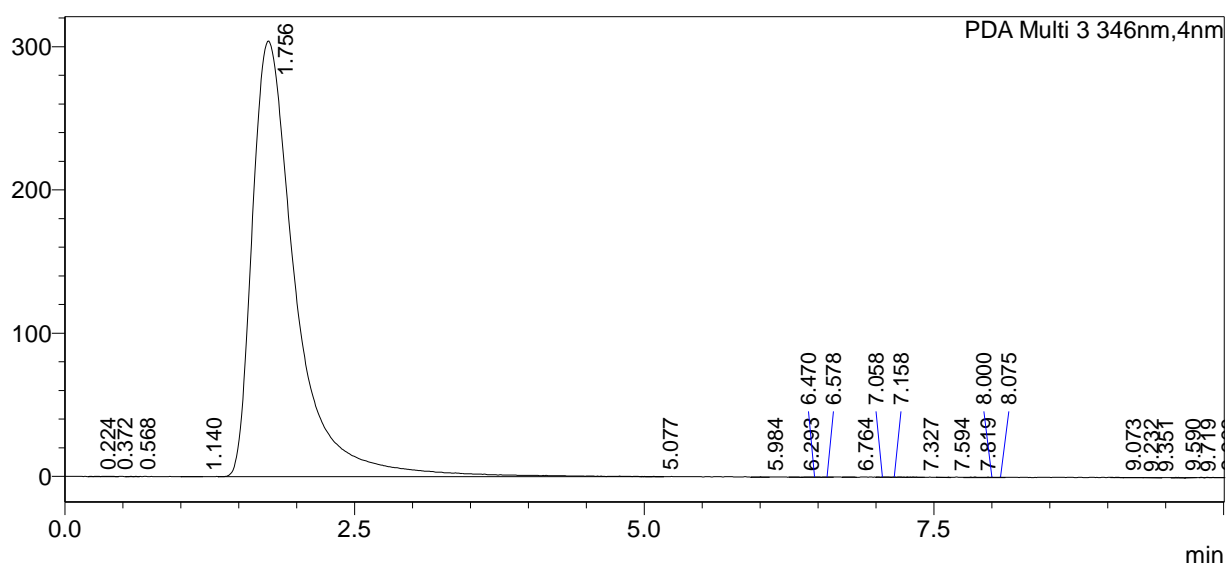

## <Peak Table>

PDA Ch3 346nm

| Peak# | Ret. Time | Area    | Height | Peak Purity Index    |
|-------|-----------|---------|--------|----------------------|
| 1     | 0.224     | 1605    | 212    | Cannot be calculated |
| 2     | 0.372     | 1319    | 300    | Cannot be calculated |
| 3     | 0.568     | 1244    | 227    | Cannot be calculated |
| 4     | 1.140     | 1192    | 187    | Cannot be calculated |
| 5     | 1.756     | 7894648 | 304150 | 0.999512             |
| 6     | 5.077     | 1135    | 199    | Cannot be calculated |
| 7     | 5.984     | 2367    | 317    | Cannot be calculated |
| 8     | 6.293     | 1192    | 217    | Cannot be calculated |
| 9     | 6.470     | 1816    | 328    | Cannot be calculated |
| 10    | 6.578     | 1849    | 305    | Cannot be calculated |
| 11    | 6.764     | 1354    | 264    | Cannot be calculated |
| 12    | 7.058     | 1610    | 243    | Cannot be calculated |
| 13    | 7.158     | 1493    | 277    | Cannot be calculated |
| 14    | 7.327     | 1399    | 227    | Cannot be calculated |
| 15    | 7.594     | 1191    | 207    | Cannot be calculated |
| 16    | 7.819     | 1655    | 276    | Cannot be calculated |
| 17    | 8.000     | 1253    | 257    | Cannot be calculated |
| 18    | 8.075     | 1258    | 284    | Cannot be calculated |
| 19    | 9.073     | 1106    | 263    | Cannot be calculated |
| 20    | 9.232     | 1010    | 164    | Cannot be calculated |
| 21    | 9.351     | 1224    | 146    | Cannot be calculated |
| 22    | 9.590     | 1253    | 293    | Cannot be calculated |

| Peak# | Ret. Time | Area    | Height | Peak Purity Index    |
|-------|-----------|---------|--------|----------------------|
| 23    | 9.719     | 1038    | 218    | Cannot be calculated |
| 24    | 9.908     | 1173    | 197    | Cannot be calculated |
| Total |           | 7926385 | 309757 |                      |



8.232  
8.212  
7.871  
7.724  
7.598  
7.581  
7.444  
7.172  
6.741

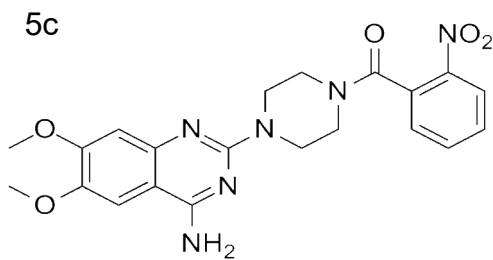

3.830  
3.794  
3.715  
3.268

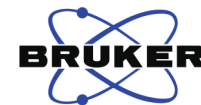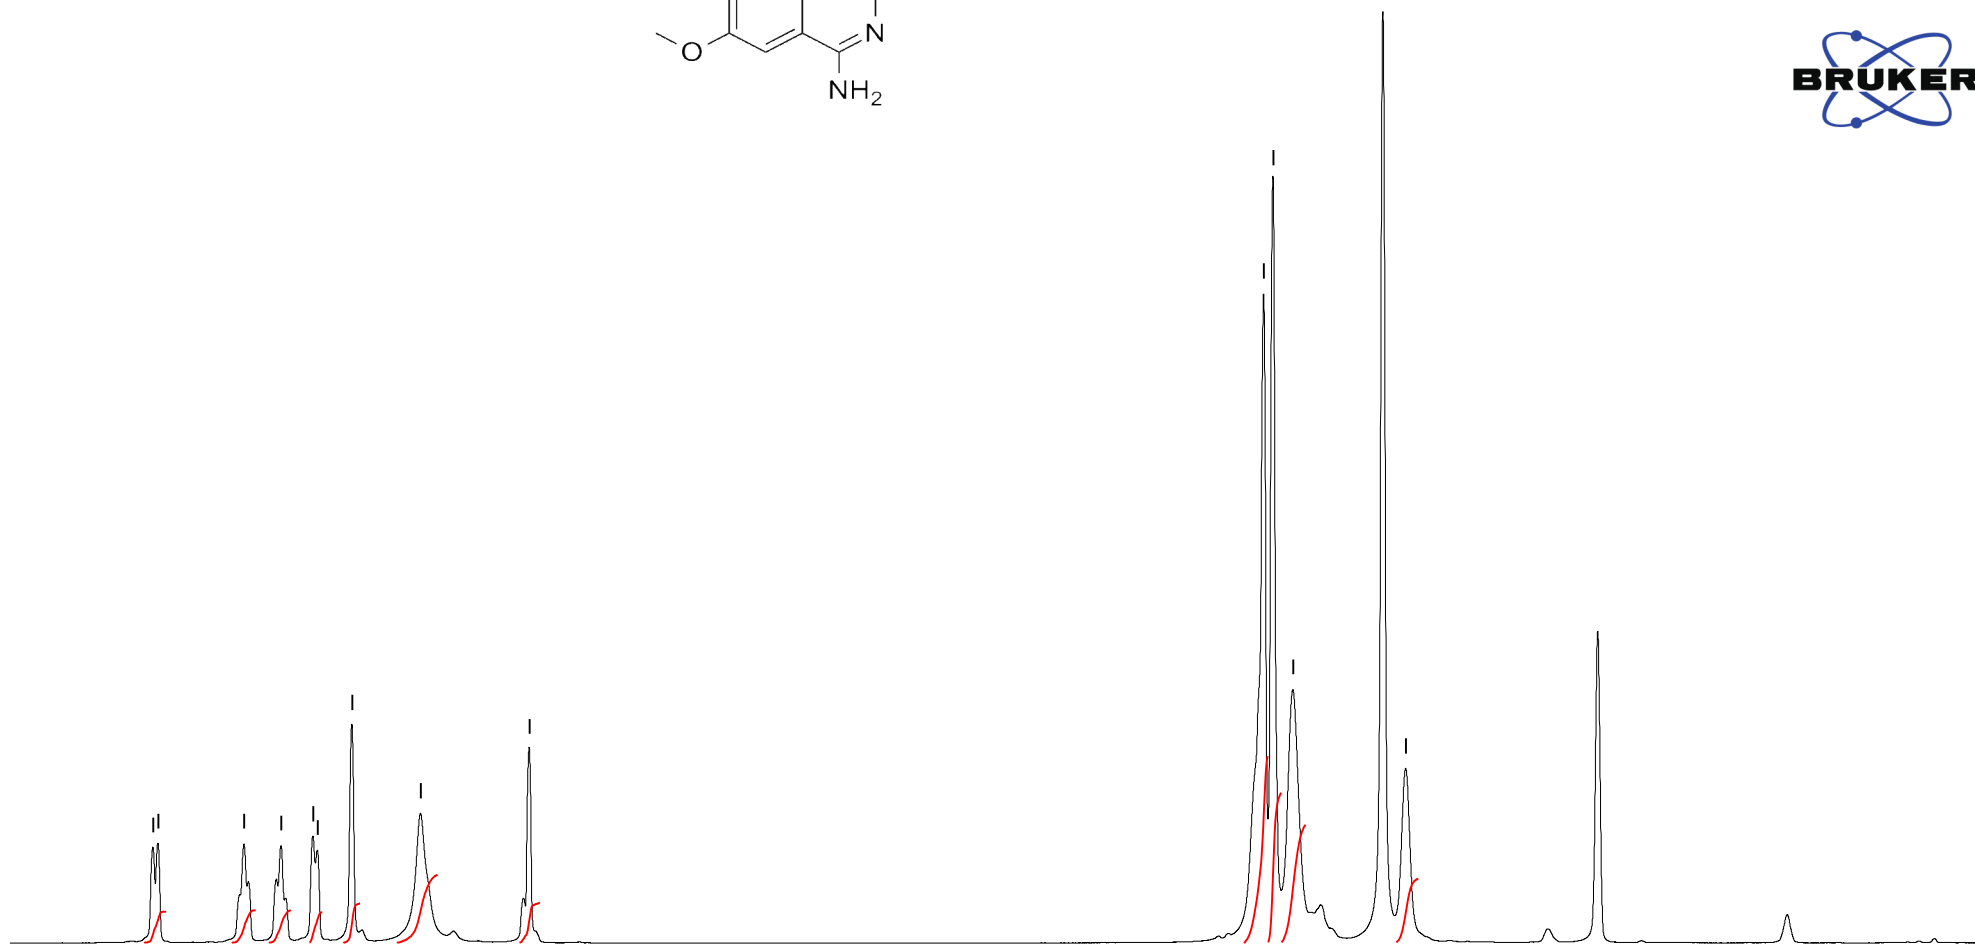

8.5 8.0 7.5 7.0 6.5 6.0 5.5 5.0 4.5 4.0 3.5 3.0 2.5 2.0 1.5 ppm

0.78  
0.81  
0.81  
0.77  
1.00  
1.71  
1.00

4.75  
3.76  
2.97  
1.60

166.02  
161.65  
158.77  
154.72  
149.16  
145.91  
145.59  
135.36  
132.89  
130.77  
128.62  
125.23

105.71  
104.15  
103.51

67.48

56.31  
55.89

46.95  
43.95  
43.65  
41.88

25.59

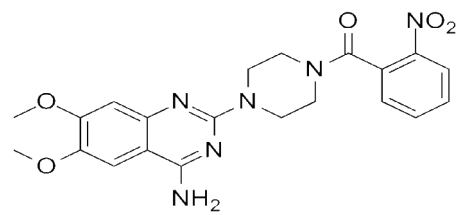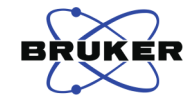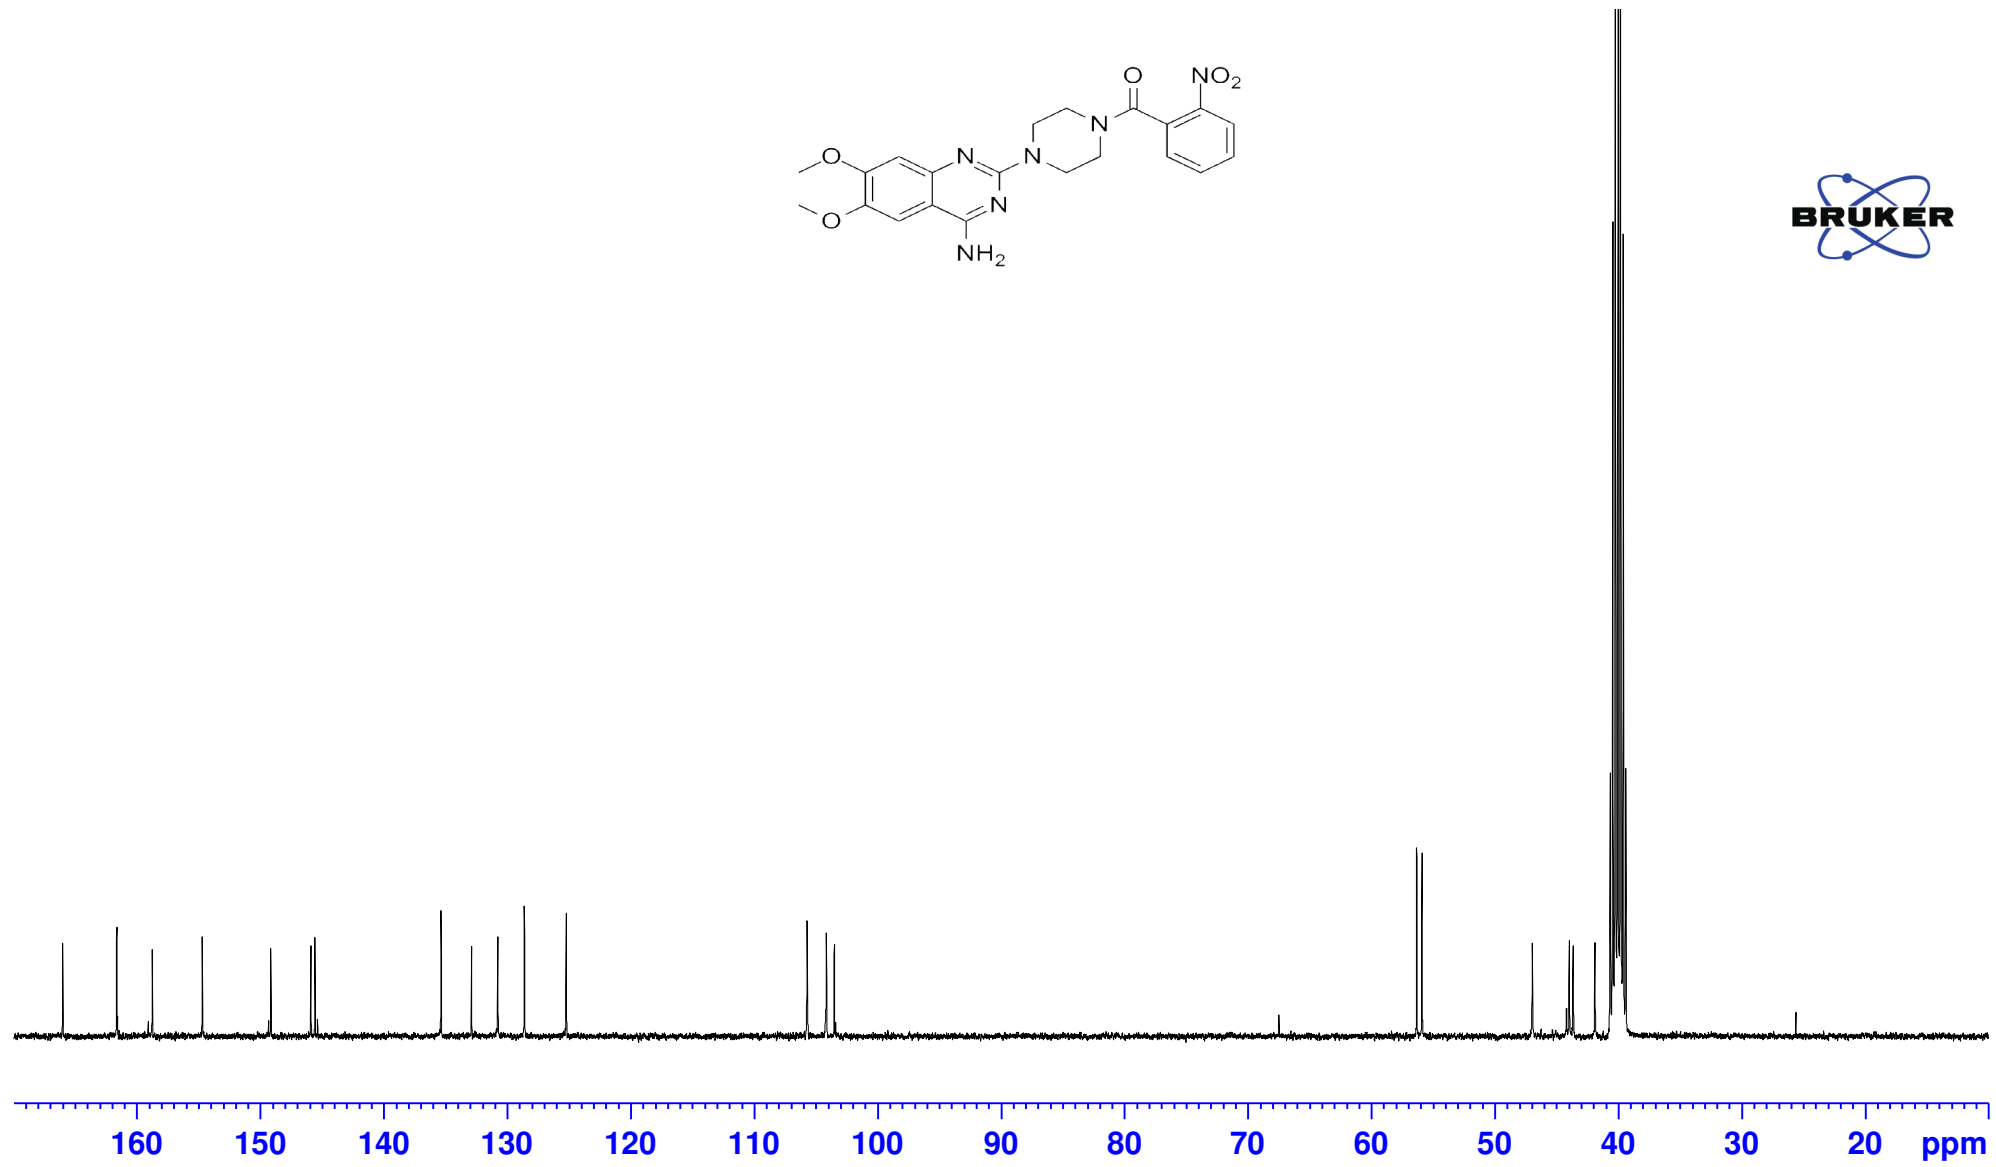

## ==== Shimadzu LabSolutions Data Report ====

Sample ID : 1 Acquired 12/20/2019 4:29:54 PM  
Data Filename : CF-F-18.lcd

<Chromatogram>

Segment#1

282,523

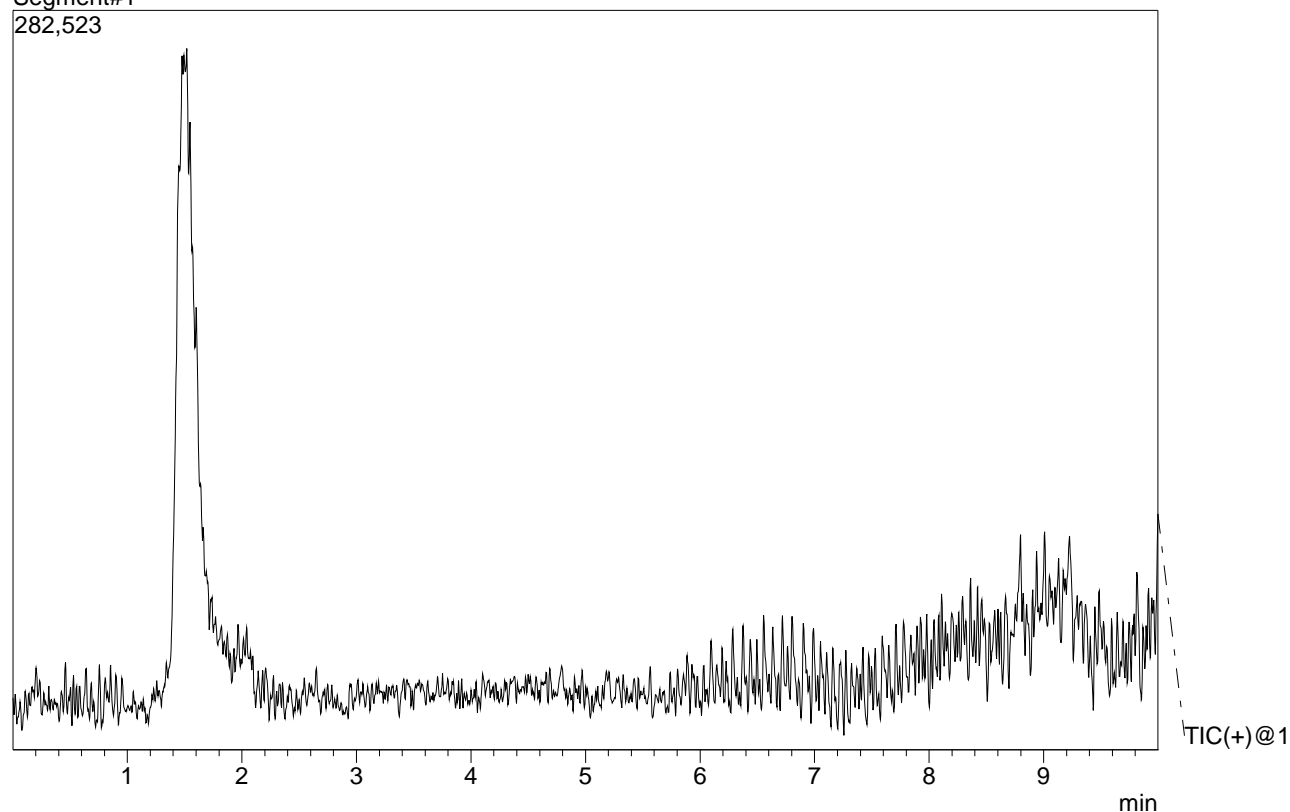

<Spectrum>

R.Time:----(Scan#:----)

MassPeaks:726 BasePeak:439.10(16385)

Spectrum Mode:Averaged 1.323-1.824(379-522)

BG Mode:None Polarity:Positive Segment 1 - Event 1

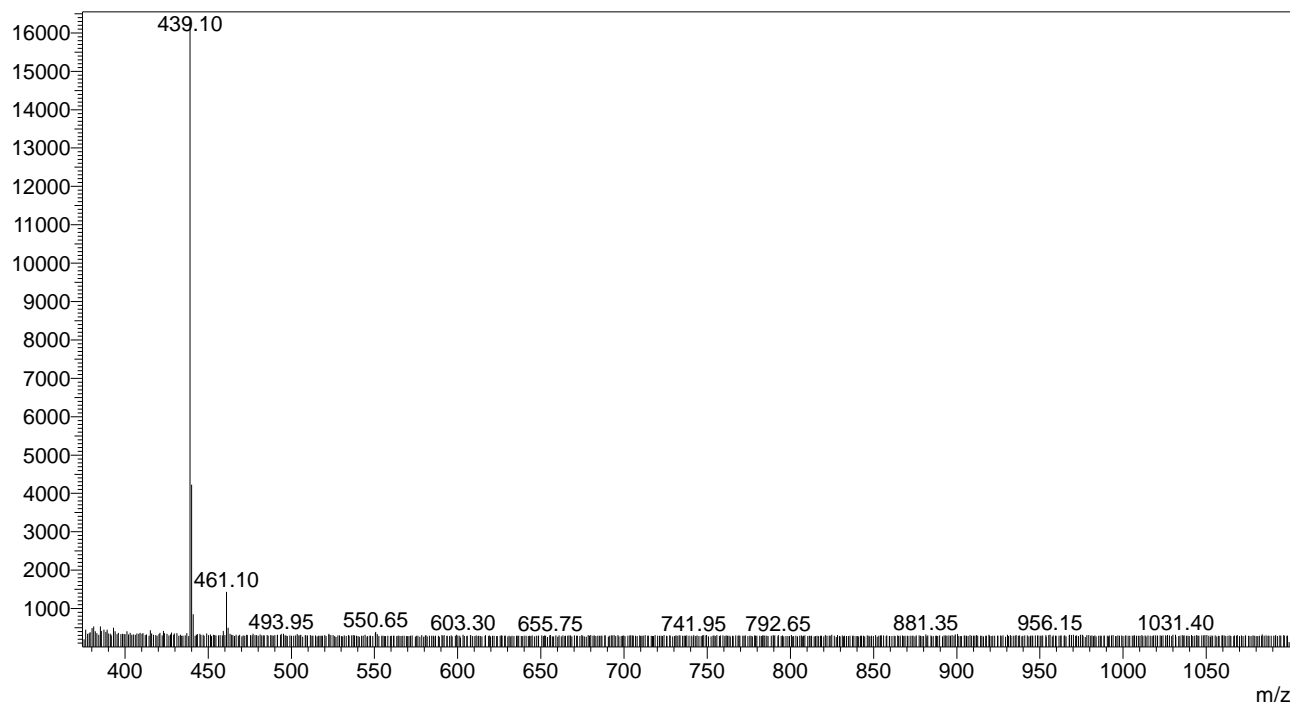



# Analysis Report

## <Sample Information>

Sample Name : CF\_18  
 Sample ID : CF\_018  
 Data Filename : CF\_Batch\_13\_6\_20\_6182020\_018.lcd  
 Method Filename : PDA\_6\_18\_20\_batch.lcm  
 Batch Filename : CF\_Batch\_13\_6\_20.lcb  
 Vial # : 1-18  
 Injection Volume : 5 uL  
 Date Acquired : 6/18/2020 1:24:39 PM  
 Date Processed : 6/18/2020 1:34:44 PM

Sample Type : Unknown  
 Acquired by : System Administrator  
 Processed by : System Administrator

## <Chromatogram>

mAU

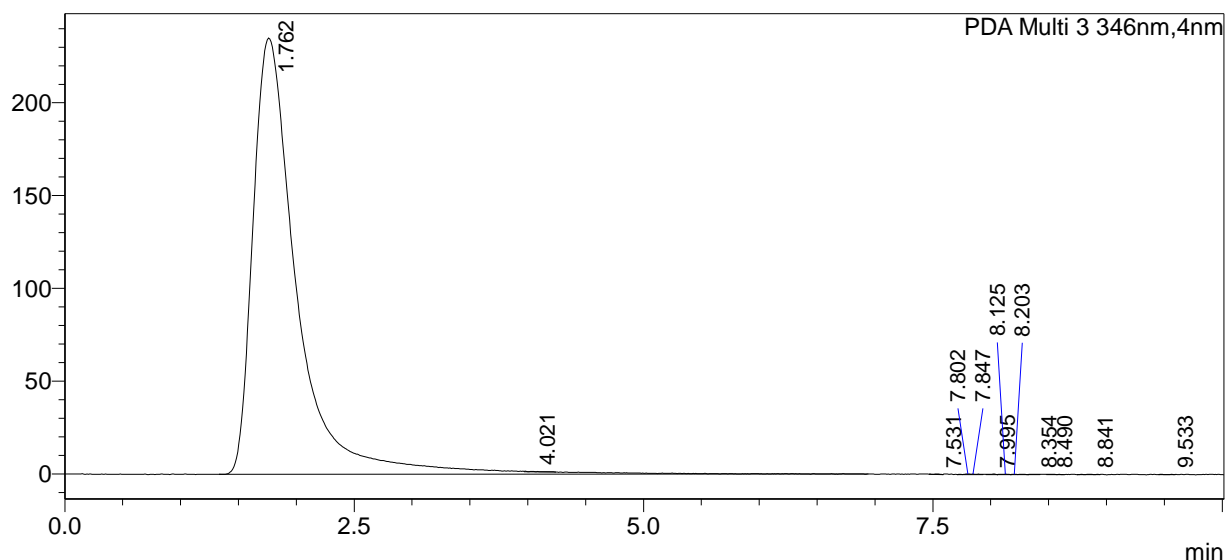

## <Peak Table>

PDA Ch3 346nm

| Peak# | Ret. Time | Area    | Height | Peak Purity Index    |
|-------|-----------|---------|--------|----------------------|
| 1     | 1.762     | 6219216 | 235161 | 0.999120             |
| 2     | 4.021     | 1787    | 196    | Cannot be calculated |
| 3     | 7.531     | 1104    | 284    | Cannot be calculated |
| 4     | 7.802     | 1129    | 289    | Cannot be calculated |
| 5     | 7.847     | 1218    | 246    | Cannot be calculated |
| 6     | 7.995     | 1019    | 166    | Cannot be calculated |
| 7     | 8.125     | 1121    | 258    | Cannot be calculated |
| 8     | 8.203     | 1173    | 200    | Cannot be calculated |
| 9     | 8.354     | 1207    | 228    | Cannot be calculated |
| 10    | 8.490     | 1011    | 190    | Cannot be calculated |
| 11    | 8.841     | 1383    | 171    | Cannot be calculated |
| 12    | 9.533     | 1006    | 120    | Cannot be calculated |
| Total |           | 6232374 | 237510 |                      |

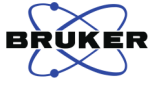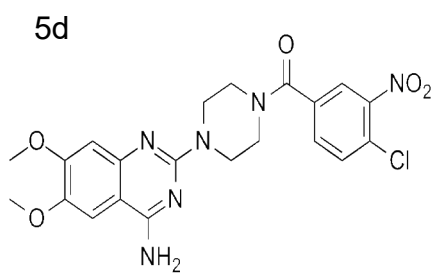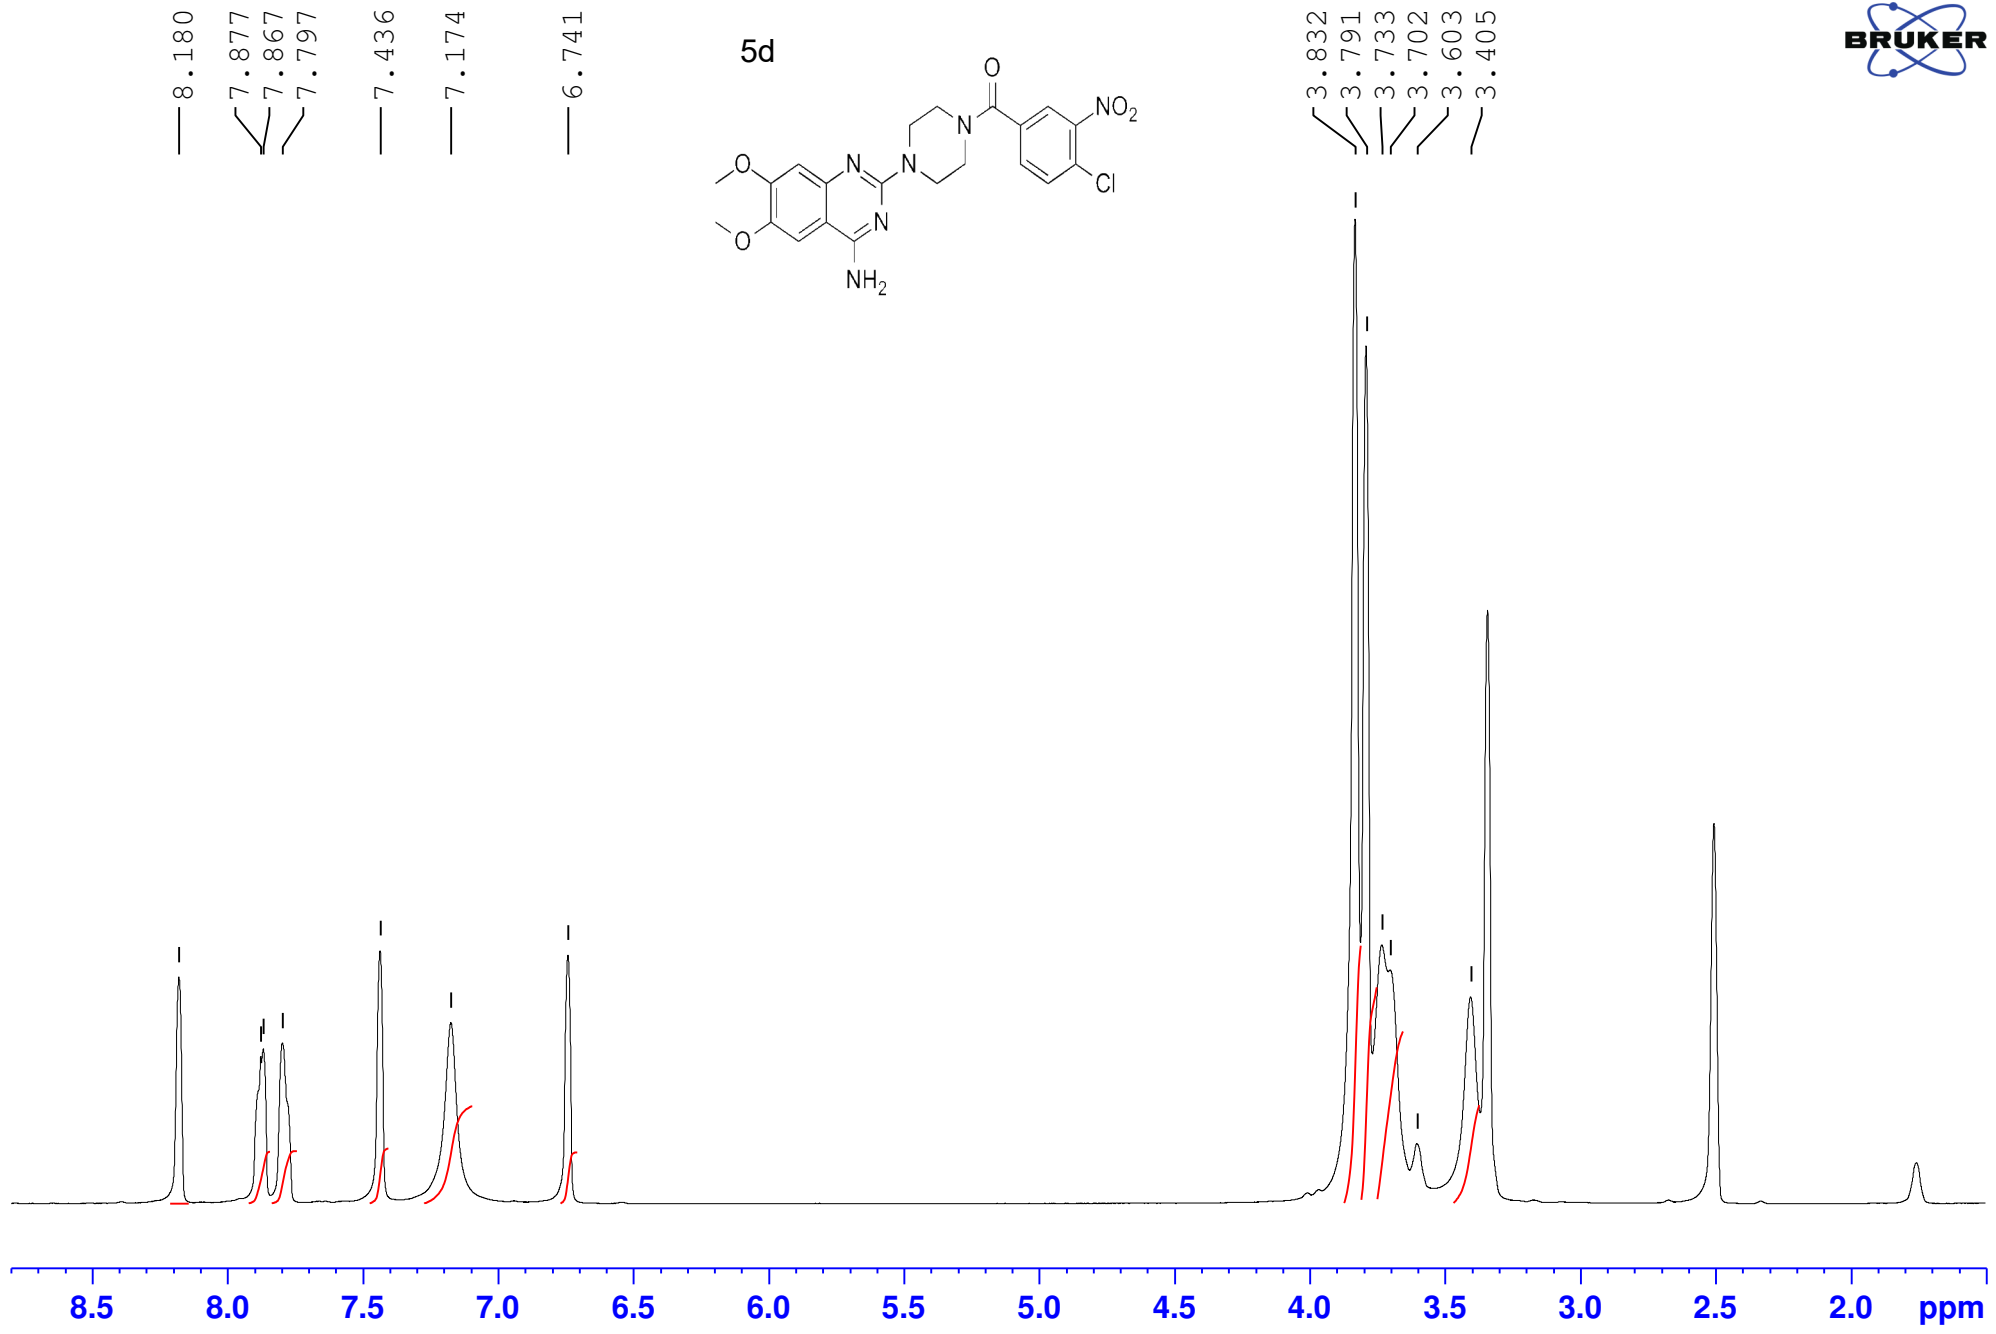

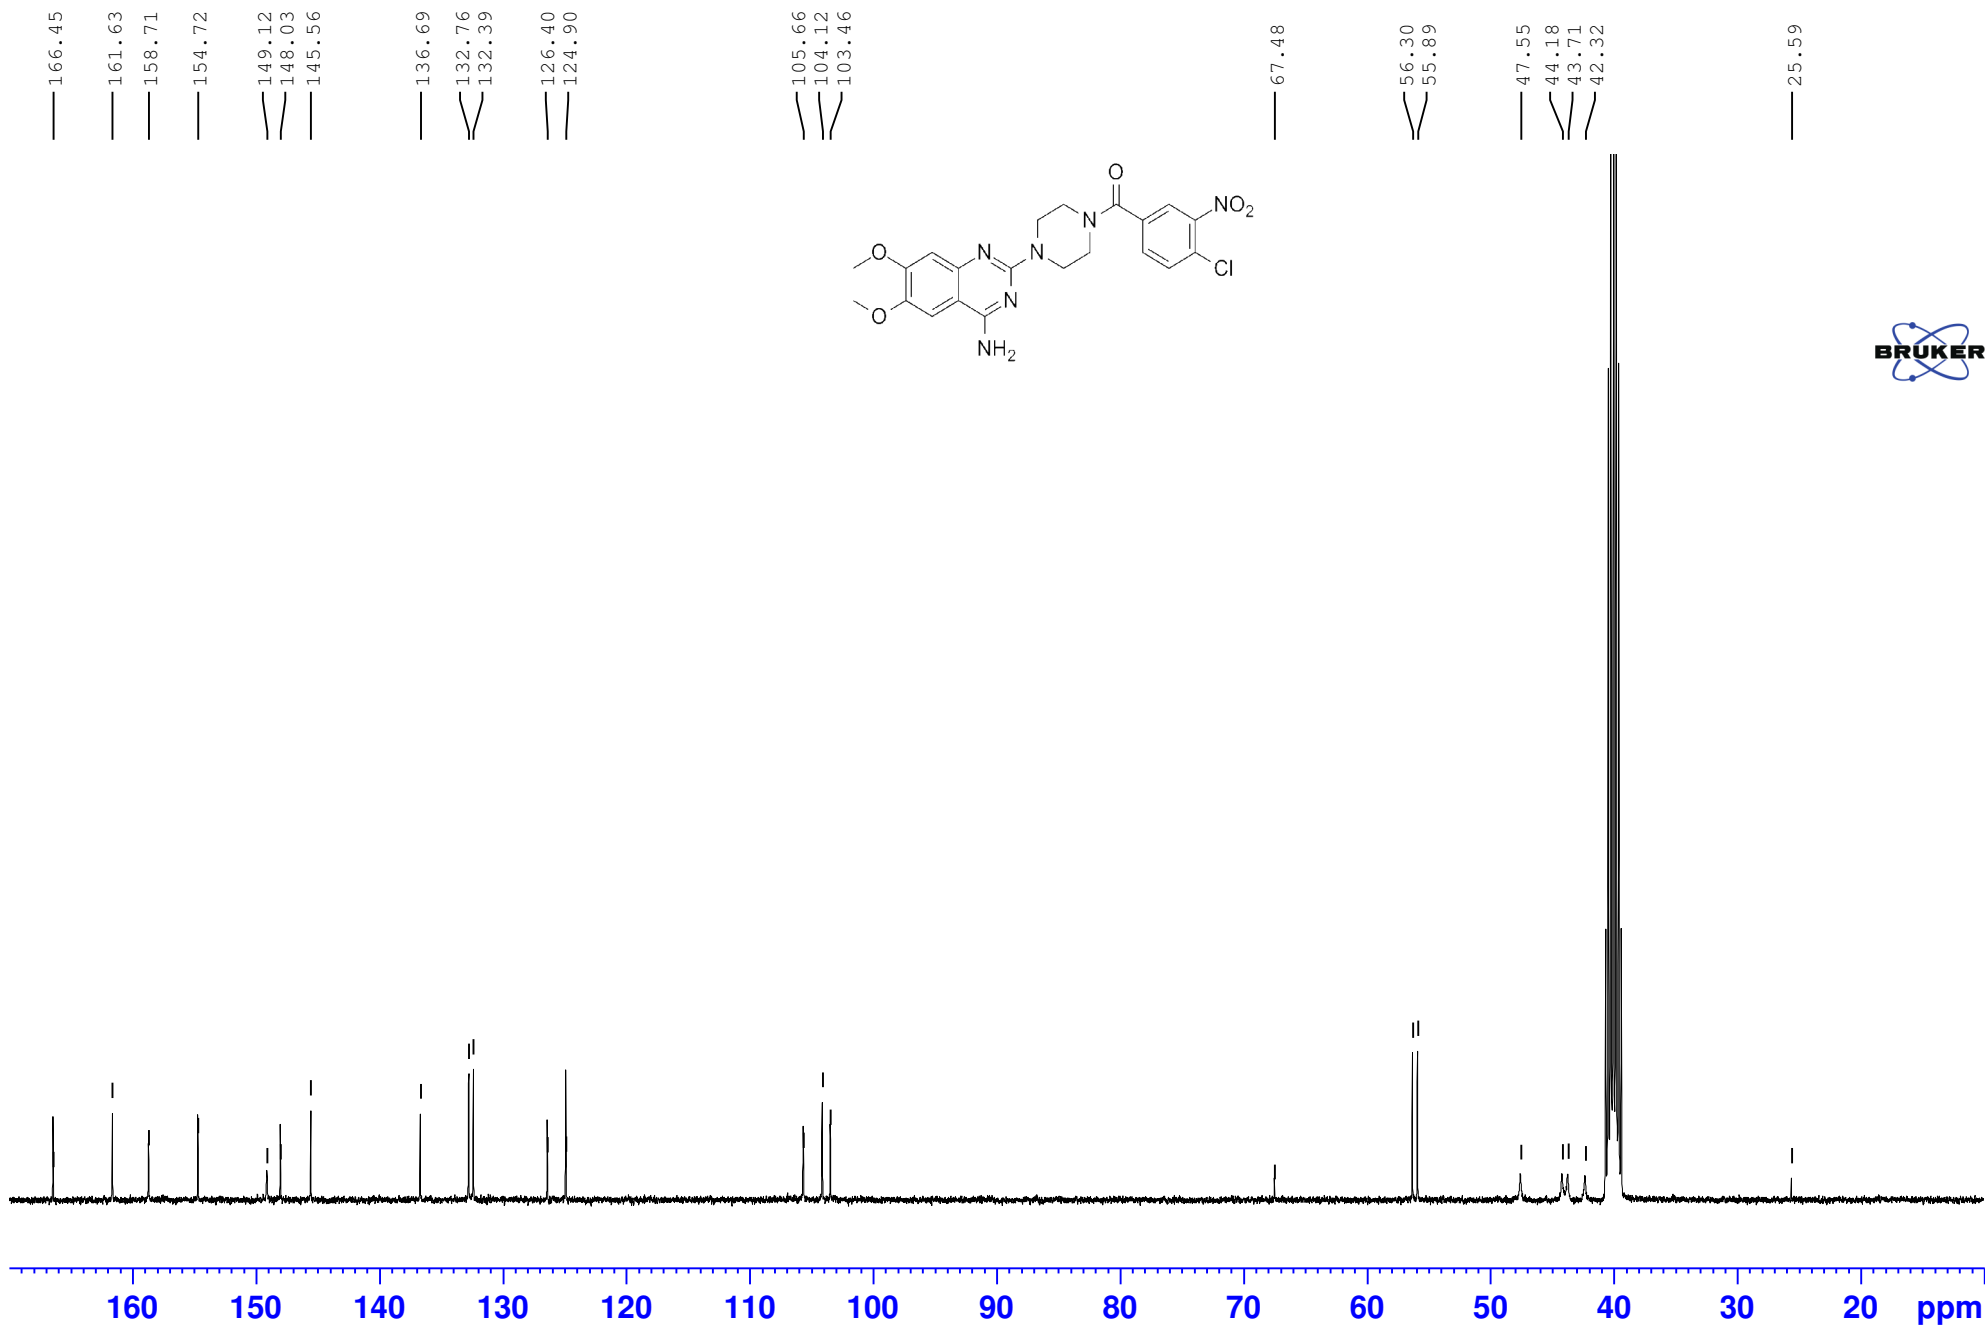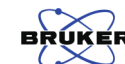

# ==== Shimadzu LabSolutions Data Report ====

Sample ID : 1                      Acquired                      1/10/2020 1:22:44 AM  
Data Filename : CF-F-16.lcd

## <Chromatogram>

Segment#1

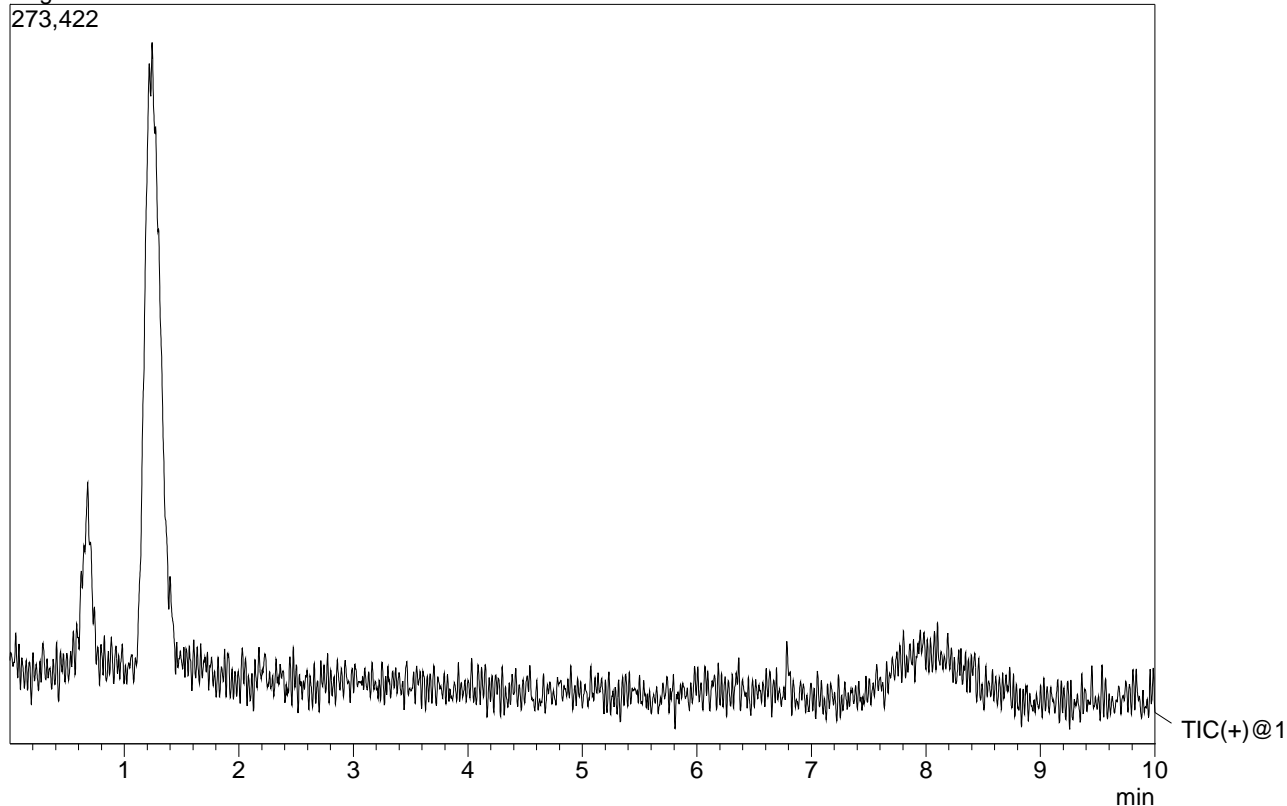

## <Spectrum>

R.Time:----(Scan#:----)  
MassPeaks:401 BasePeak:472.95(45631)  
Spectrum Mode:Averaged 1.088-1.448(654-870)  
BG Mode:None Polarity:Positive Segment 1 - Event 1

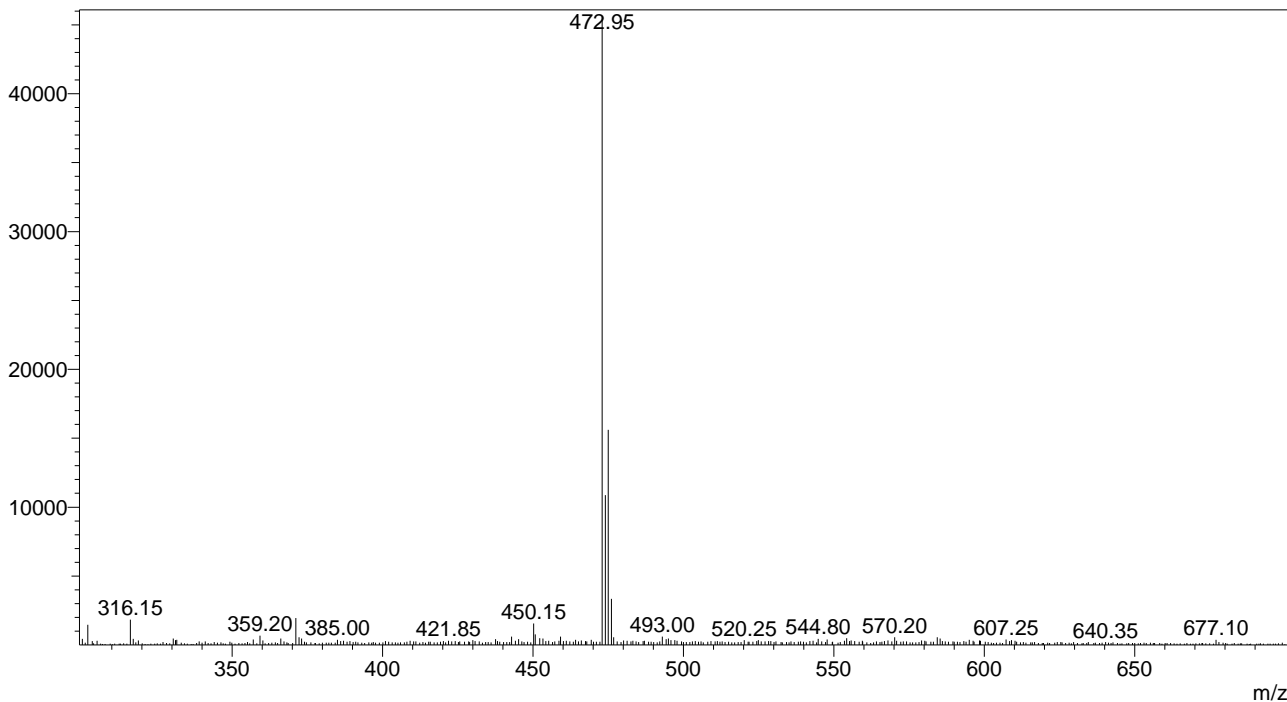

# Analysis Report

## <Sample Information>

Sample Name : CF\_16  
 Sample ID : CF\_016  
 Data Filename : CF\_Batch\_13\_6\_20\_6182020\_016.lcd  
 Method Filename : PDA\_6\_18\_20\_batch.lcm  
 Batch Filename : CF\_Batch\_13\_6\_20.lcb  
 Vial # : 1-16  
 Injection Volume : 5 uL  
 Date Acquired : 6/18/2020 1:03:38 PM  
 Date Processed : 6/18/2020 1:13:43 PM

Sample Type : Unknown  
 Acquired by : System Administrator  
 Processed by : System Administrator

## <Chromatogram>

mAU

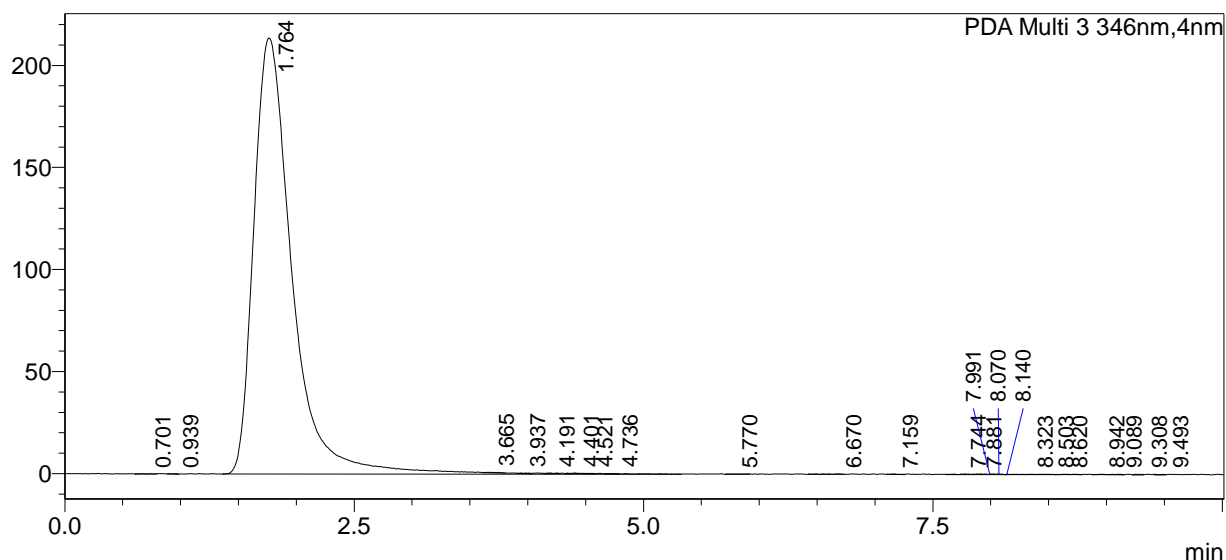

## <Peak Table>

PDA Ch3 346nm

| Peak# | Ret. Time | Area    | Height | Peak Purity Index    |
|-------|-----------|---------|--------|----------------------|
| 1     | 0.701     | 1040    | 116    | Cannot be calculated |
| 2     | 0.939     | 1045    | 224    | Cannot be calculated |
| 3     | 1.764     | 4909961 | 213624 | 0.998977             |
| 4     | 3.665     | 1474    | 177    | Cannot be calculated |
| 5     | 3.937     | 1104    | 252    | Cannot be calculated |
| 6     | 4.191     | 1754    | 264    | Cannot be calculated |
| 7     | 4.401     | 2510    | 320    | Cannot be calculated |
| 8     | 4.521     | 1038    | 227    | Cannot be calculated |
| 9     | 4.736     | 1102    | 258    | Cannot be calculated |
| 10    | 5.770     | 1803    | 208    | Cannot be calculated |
| 11    | 6.670     | 1588    | 142    | Cannot be calculated |
| 12    | 7.159     | 1454    | 297    | Cannot be calculated |
| 13    | 7.744     | 2288    | 232    | Cannot be calculated |
| 14    | 7.881     | 1187    | 374    | Cannot be calculated |
| 15    | 7.991     | 1150    | 248    | Cannot be calculated |
| 16    | 8.070     | 1621    | 361    | Cannot be calculated |
| 17    | 8.140     | 1030    | 227    | Cannot be calculated |
| 18    | 8.323     | 1303    | 221    | Cannot be calculated |
| 19    | 8.503     | 1198    | 211    | Cannot be calculated |
| 20    | 8.620     | 1502    | 178    | Cannot be calculated |
| 21    | 8.942     | 1151    | 231    | Cannot be calculated |
| 22    | 9.089     | 1212    | 291    | Cannot be calculated |



| Peak# | Ret. Time | Area    | Height | Peak Purity Index    |
|-------|-----------|---------|--------|----------------------|
| 23    | 9.308     | 1219    | 324    | cannot be calculated |
| 24    | 9.493     | 1254    | 281    | cannot be calculated |
| Total |           | 4941989 | 219288 |                      |

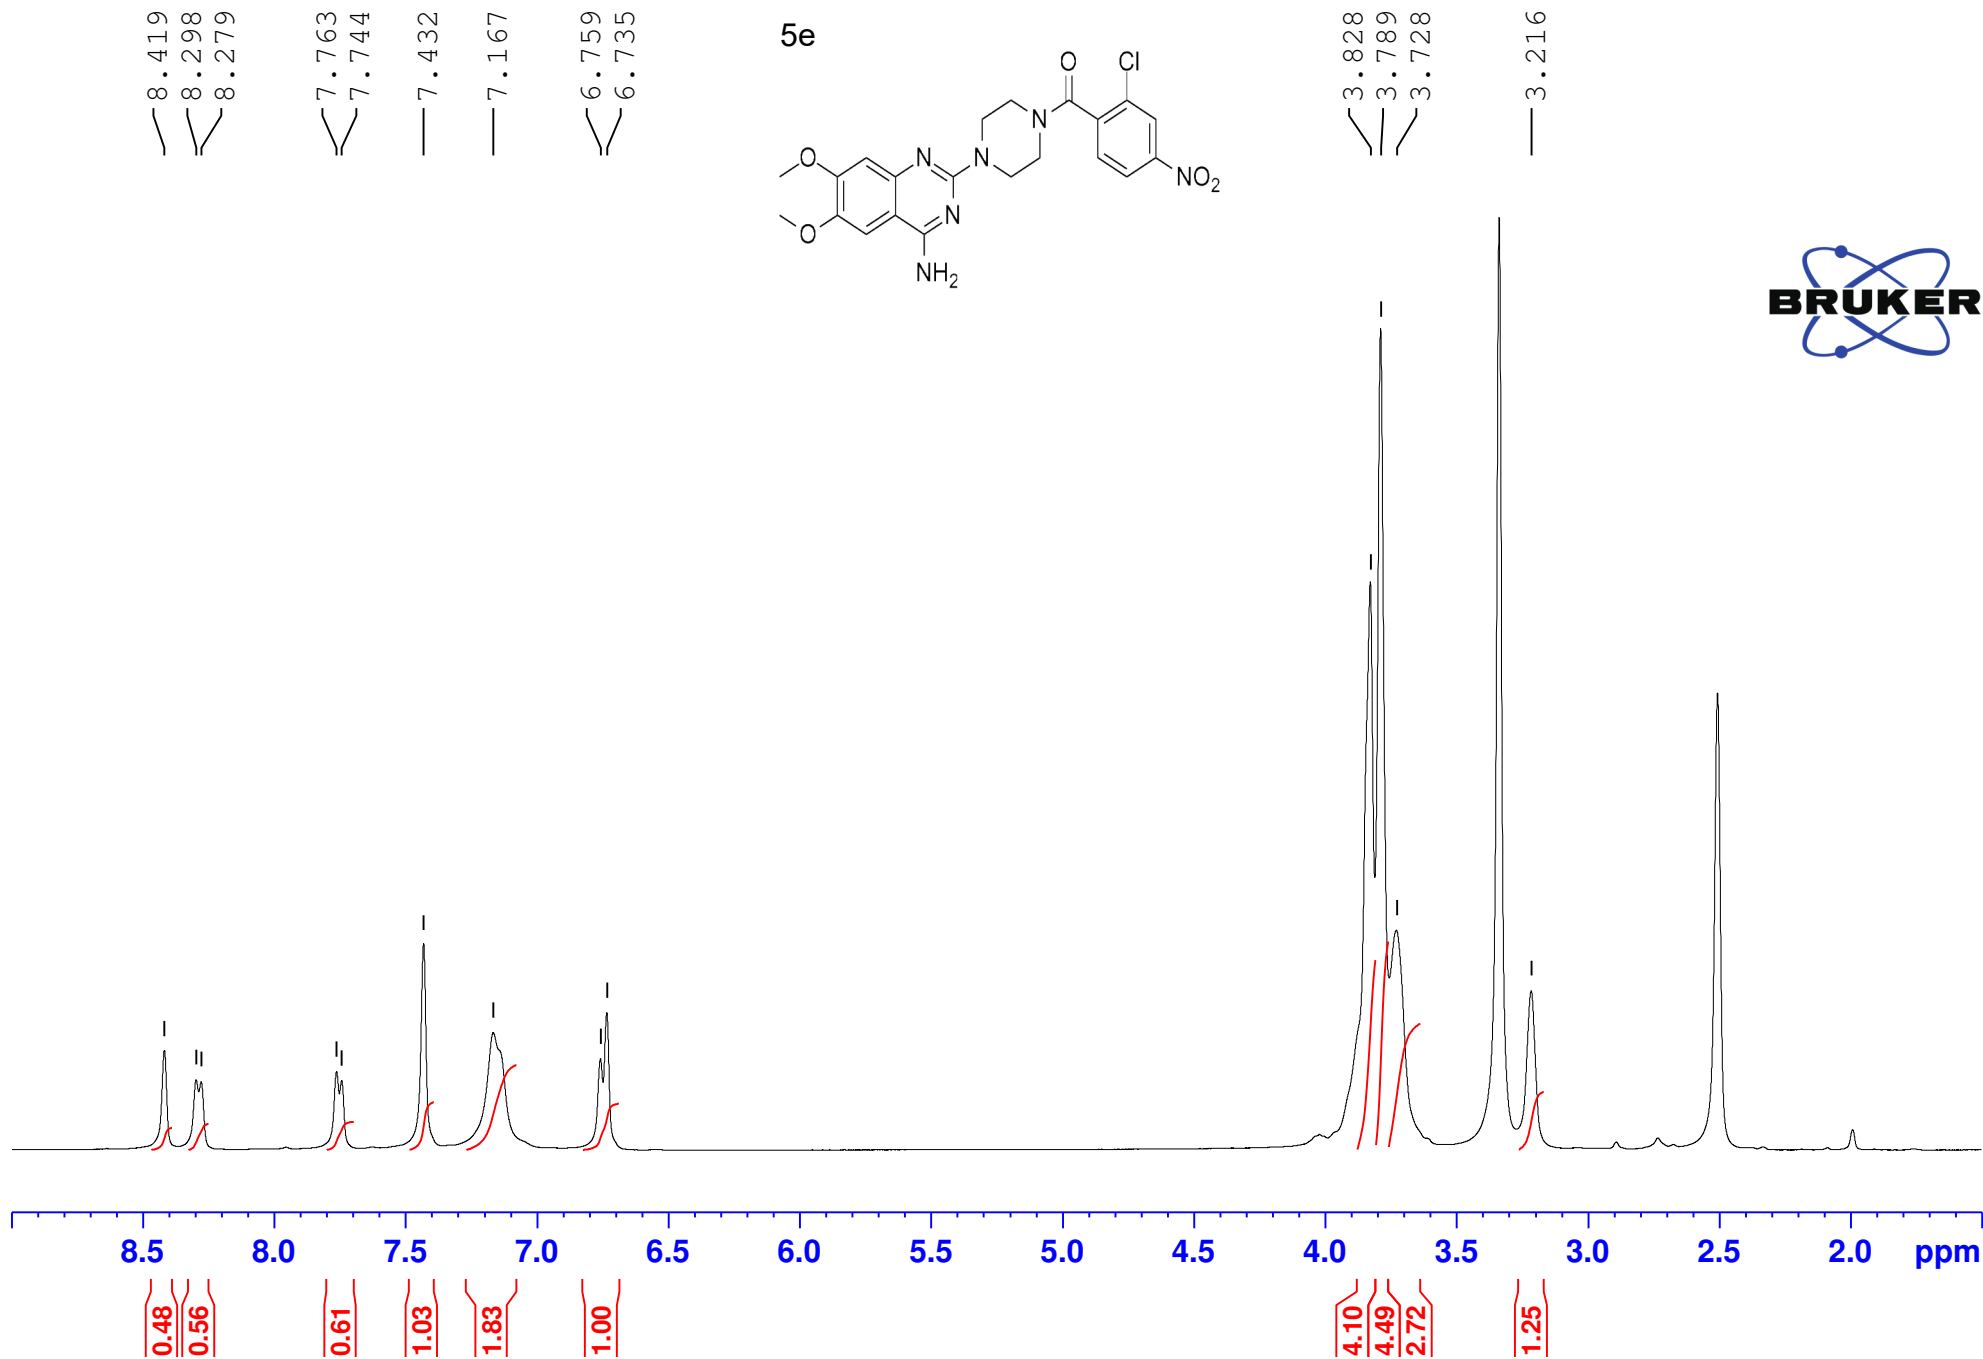

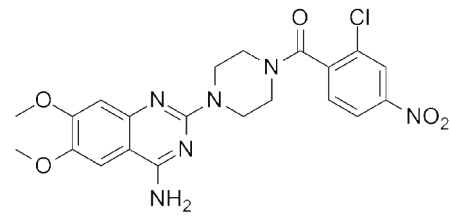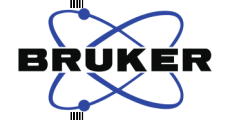

164.61  
161.64  
161.58  
159.09  
158.68  
154.72  
154.67  
149.33  
149.13  
148.60  
145.60  
145.37  
142.31

130.86  
129.71  
125.15  
123.39

105.70  
104.20  
104.12  
103.50  
103.39

56.31  
55.89

46.62  
44.21  
44.17  
43.76  
41.81

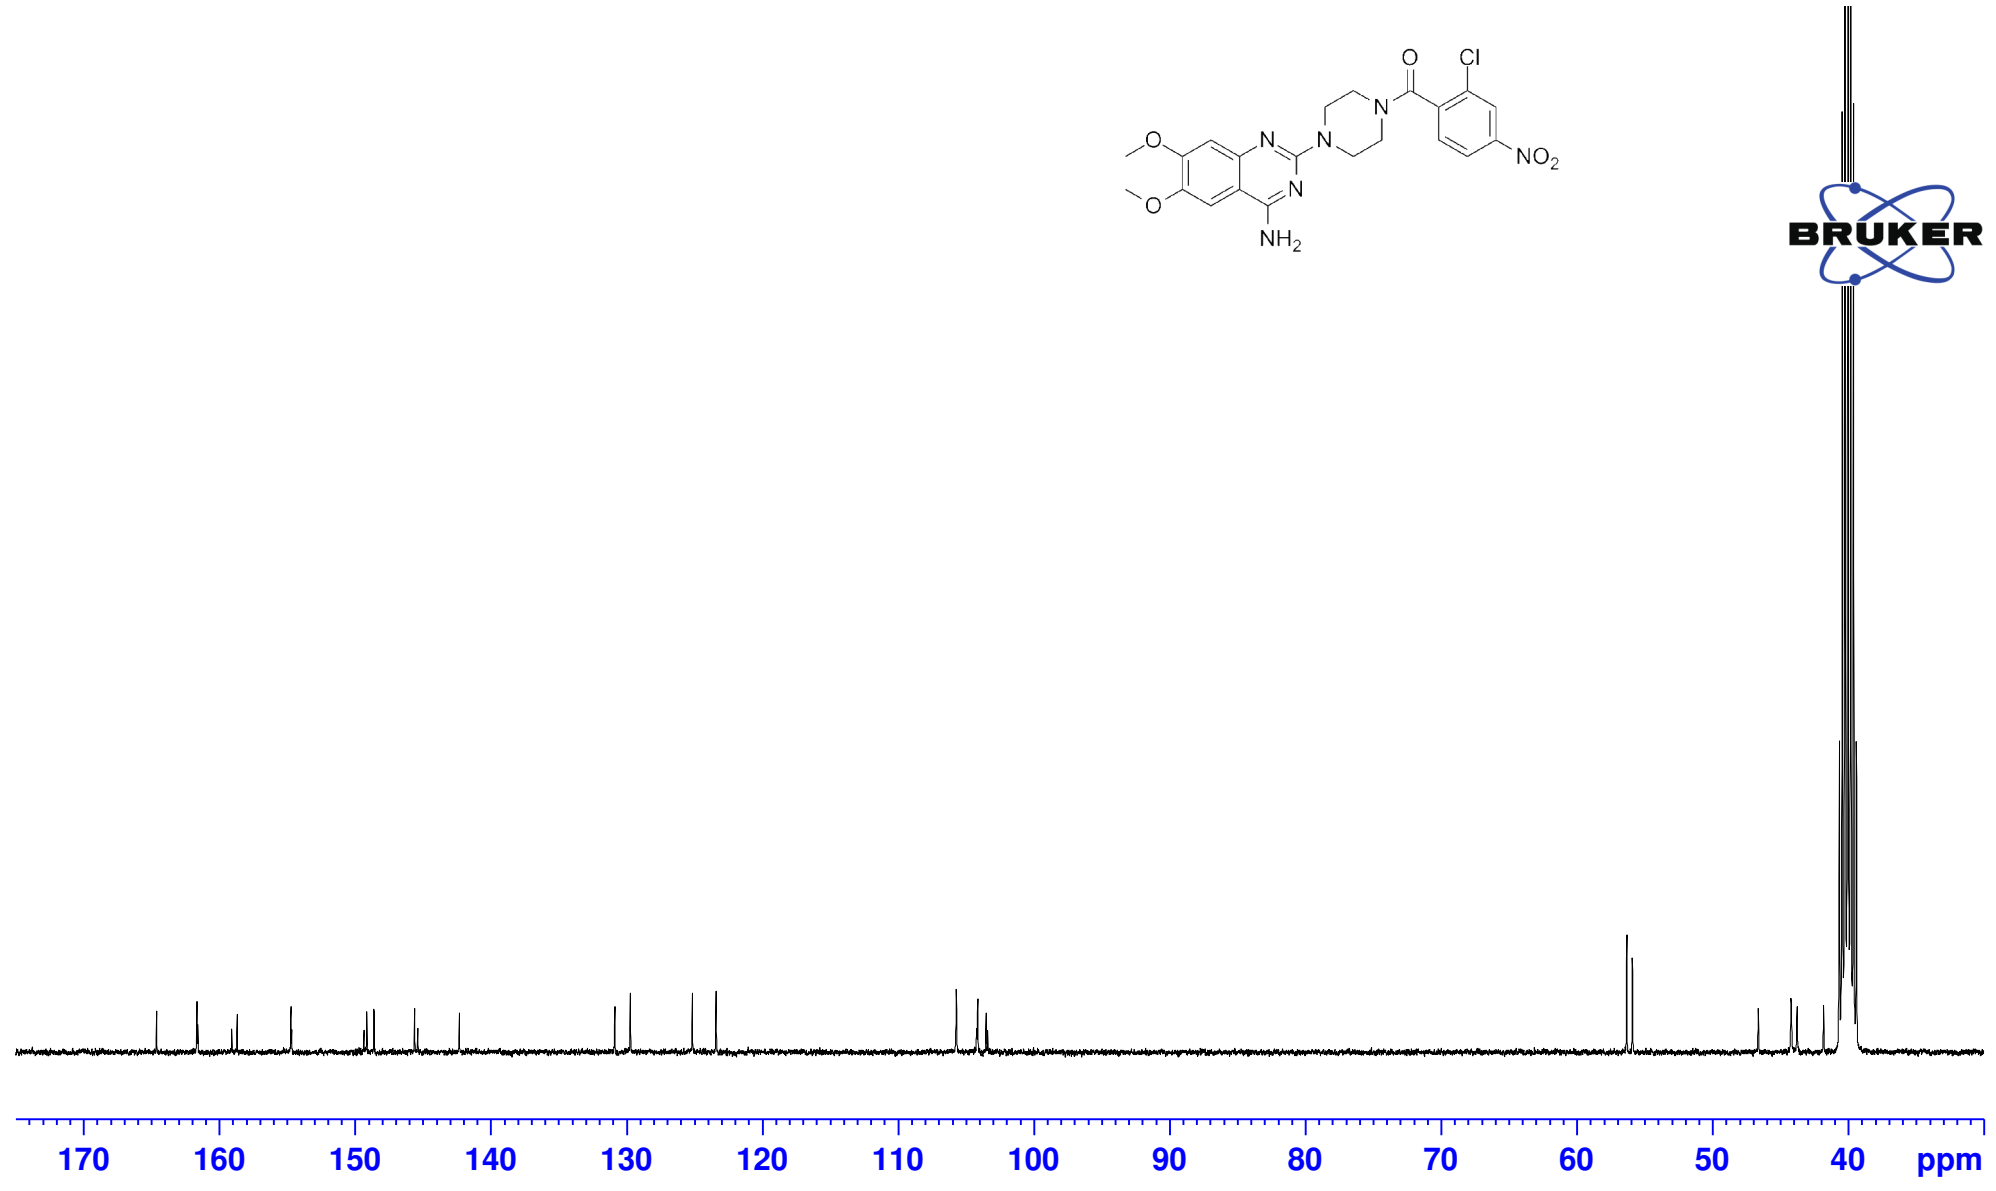

## ==== Shimadzu LabSolutions Data Report ====

Sample ID : 1 Acquired 1/9/2020 9:54:32 PM  
Data Filename : CF-F-25.lcd

<Chromatogram>

Segment#1

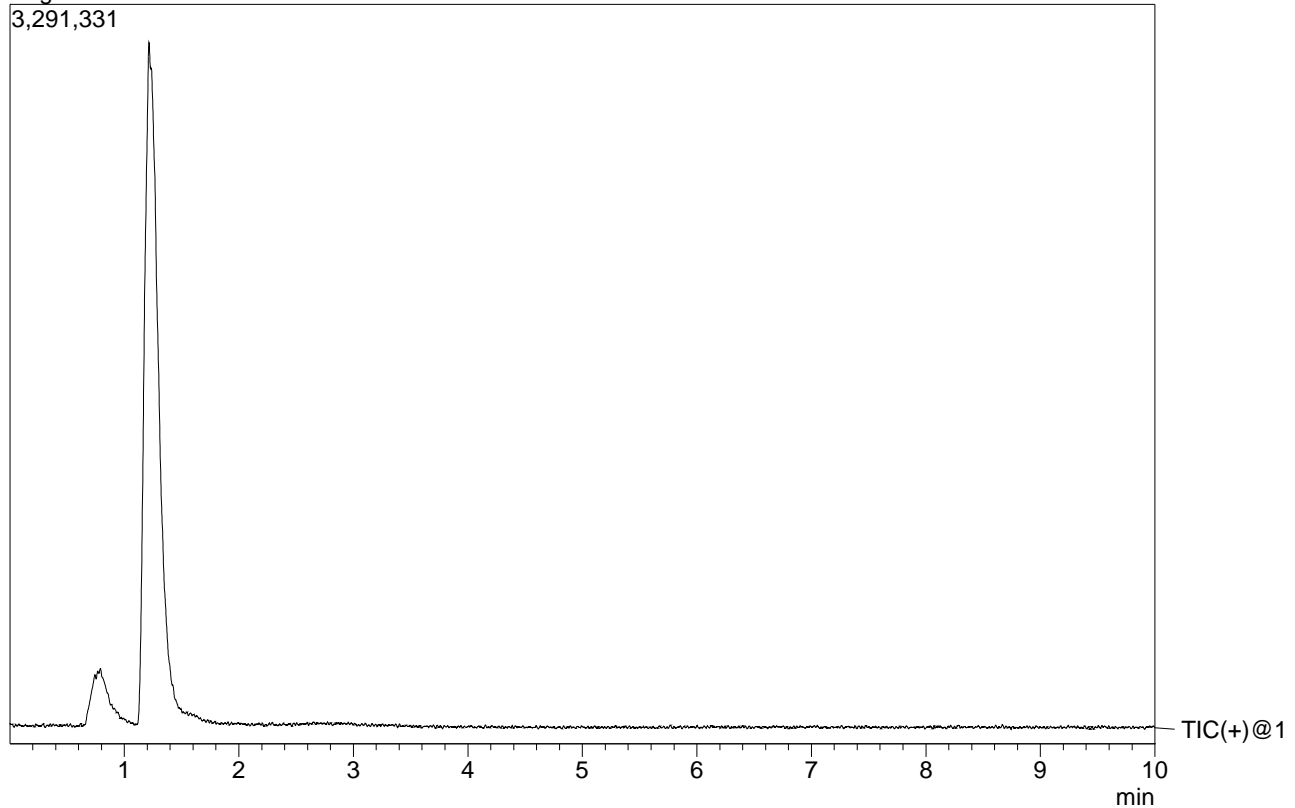

<Spectrum>

R.Time:----(Scan#:----)  
MassPeaks:401 BasePeak:473.00(564088)  
Spectrum Mode:Averaged 1.088-1.520(654-913)  
BG Mode:None Polarity:Positive Segment 1 - Event 1

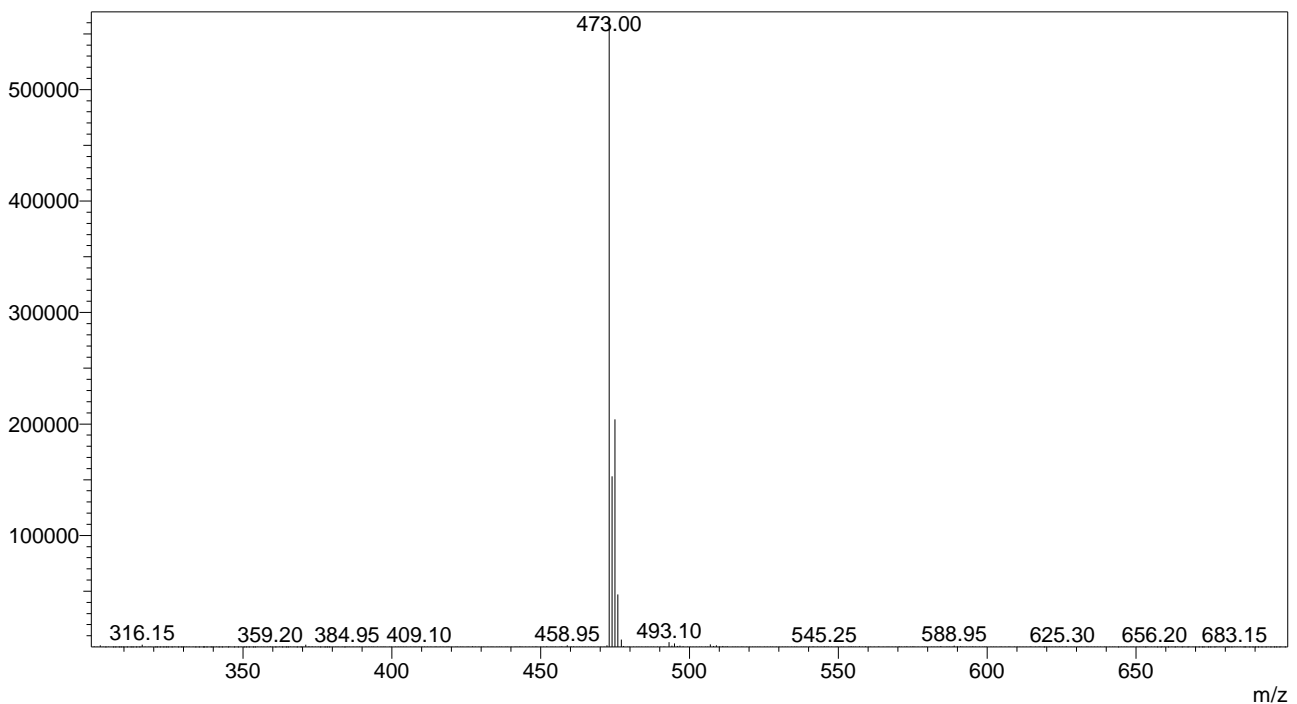



# Analysis Report

## <Sample Information>

Sample Name : CF\_25  
 Sample ID : CF\_025  
 Data Filename : CF\_Batch\_13\_6\_20\_6182020\_025.lcd  
 Method Filename : PDA\_6\_18\_20\_batch.lcm  
 Batch Filename : CF\_Batch\_13\_6\_20.lcb  
 Vial # : 1-24  
 Injection Volume : 5 uL  
 Date Acquired : 6/18/2020 2:38:06 PM  
 Date Processed : 6/18/2020 2:48:12 PM  
 Sample Type : Unknown  
 Acquired by : System Administrator  
 Processed by : System Administrator

## <Chromatogram>

mAU

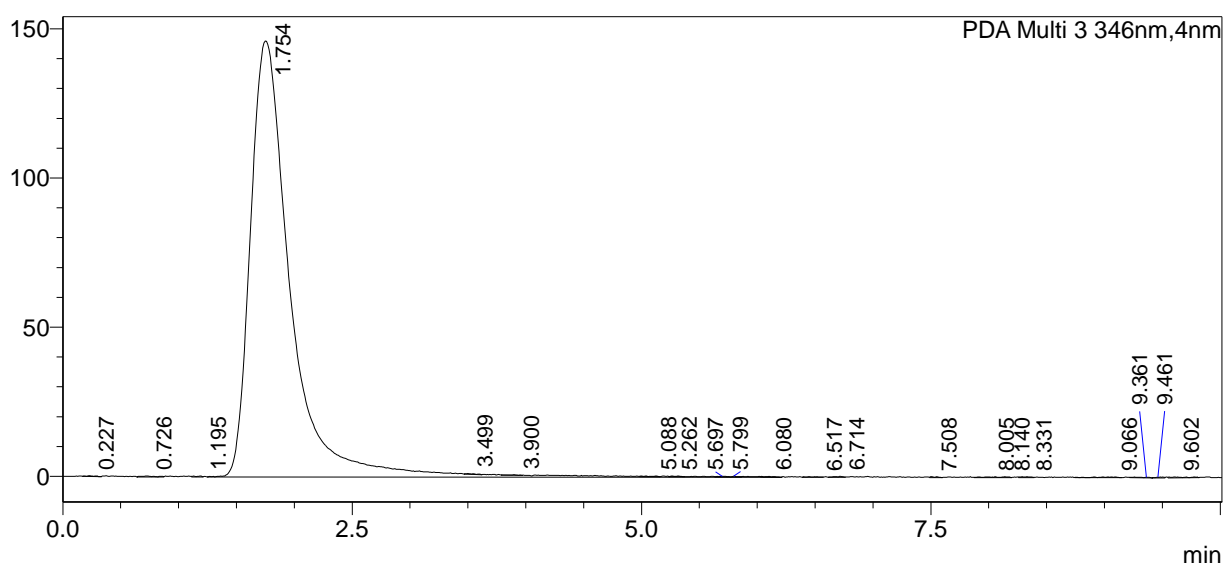

## <Peak Table>

PDA Ch3 346nm

| Peak# | Ret. Time | Area    | Height | Peak Purity Index    |
|-------|-----------|---------|--------|----------------------|
| 1     | 0.227     | 1000    | 247    | Cannot be calculated |
| 2     | 0.726     | 2160    | 309    | Cannot be calculated |
| 3     | 1.195     | 1157    | 266    | Cannot be calculated |
| 4     | 1.754     | 3501309 | 146074 | 0.997543             |
| 5     | 3.499     | 1018    | 194    | Cannot be calculated |
| 6     | 3.900     | 1082    | 234    | Cannot be calculated |
| 7     | 5.088     | 1089    | 114    | Cannot be calculated |
| 8     | 5.262     | 1275    | 267    | Cannot be calculated |
| 9     | 5.697     | 1166    | 233    | Cannot be calculated |
| 10    | 5.799     | 1116    | 309    | Cannot be calculated |
| 11    | 6.080     | 1475    | 212    | Cannot be calculated |
| 12    | 6.517     | 1317    | 199    | Cannot be calculated |
| 13    | 6.714     | 1407    | 267    | Cannot be calculated |
| 14    | 7.508     | 1062    | 257    | Cannot be calculated |
| 15    | 8.005     | 2072    | 236    | Cannot be calculated |
| 16    | 8.140     | 1115    | 267    | Cannot be calculated |
| 17    | 8.331     | 1790    | 311    | Cannot be calculated |
| 18    | 9.066     | 2993    | 233    | Cannot be calculated |
| 19    | 9.361     | 1531    | 194    | Cannot be calculated |
| 20    | 9.461     | 1041    | 169    | Cannot be calculated |
| 21    | 9.602     | 2871    | 243    | Cannot be calculated |
| Total |           | 3531044 | 150833 |                      |

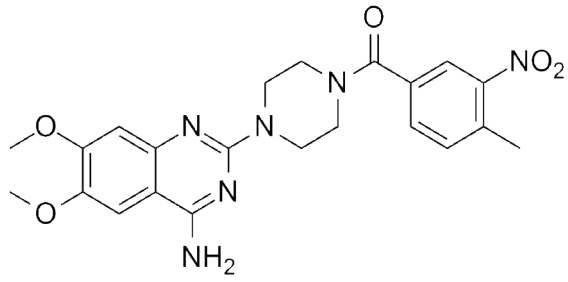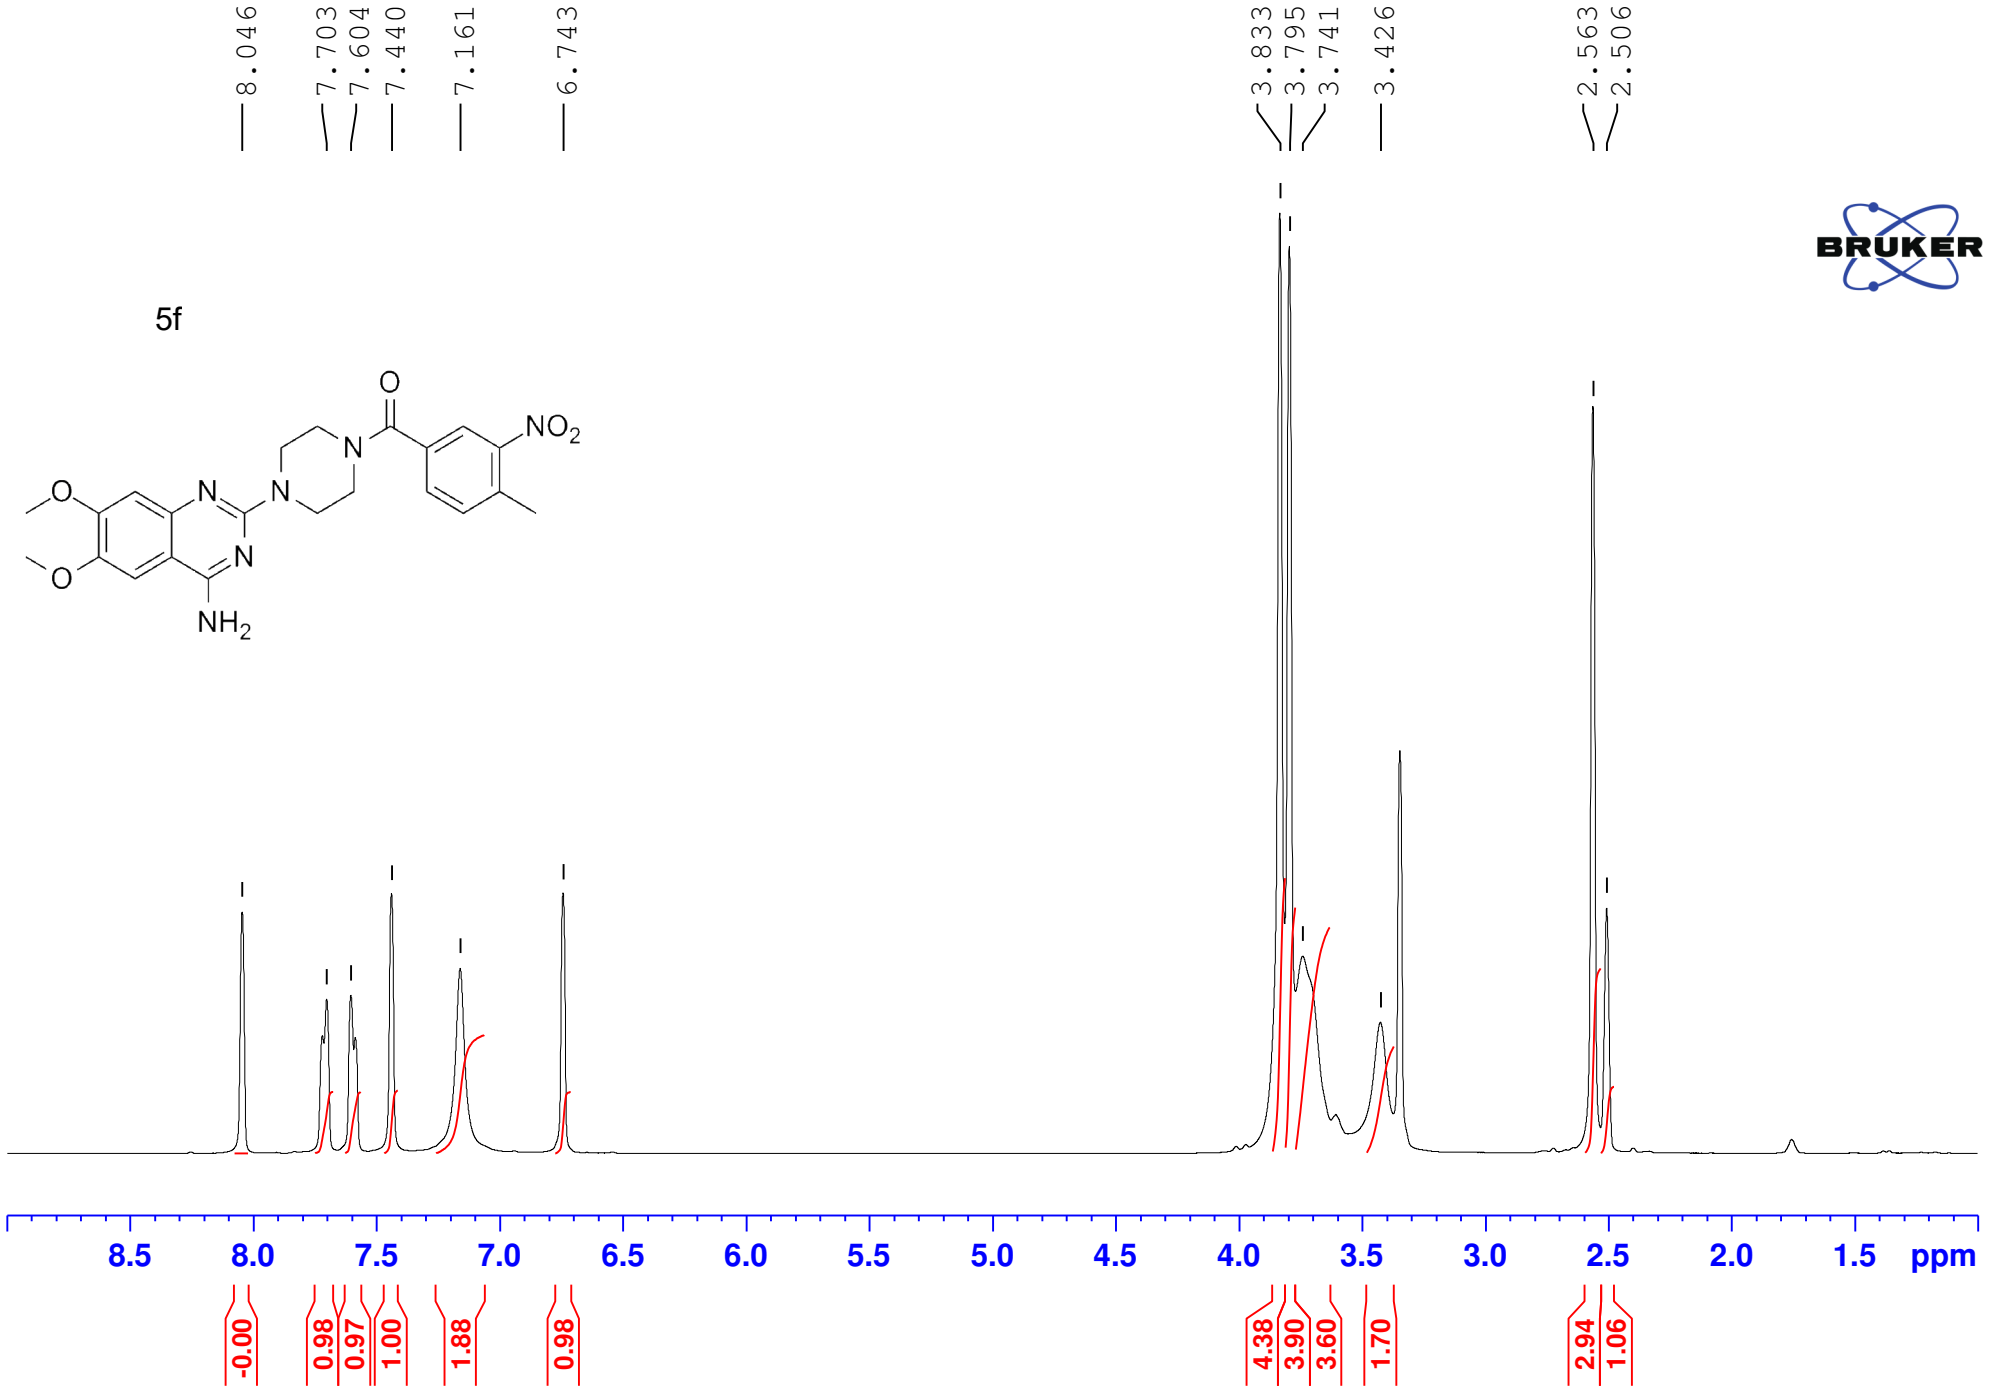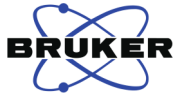

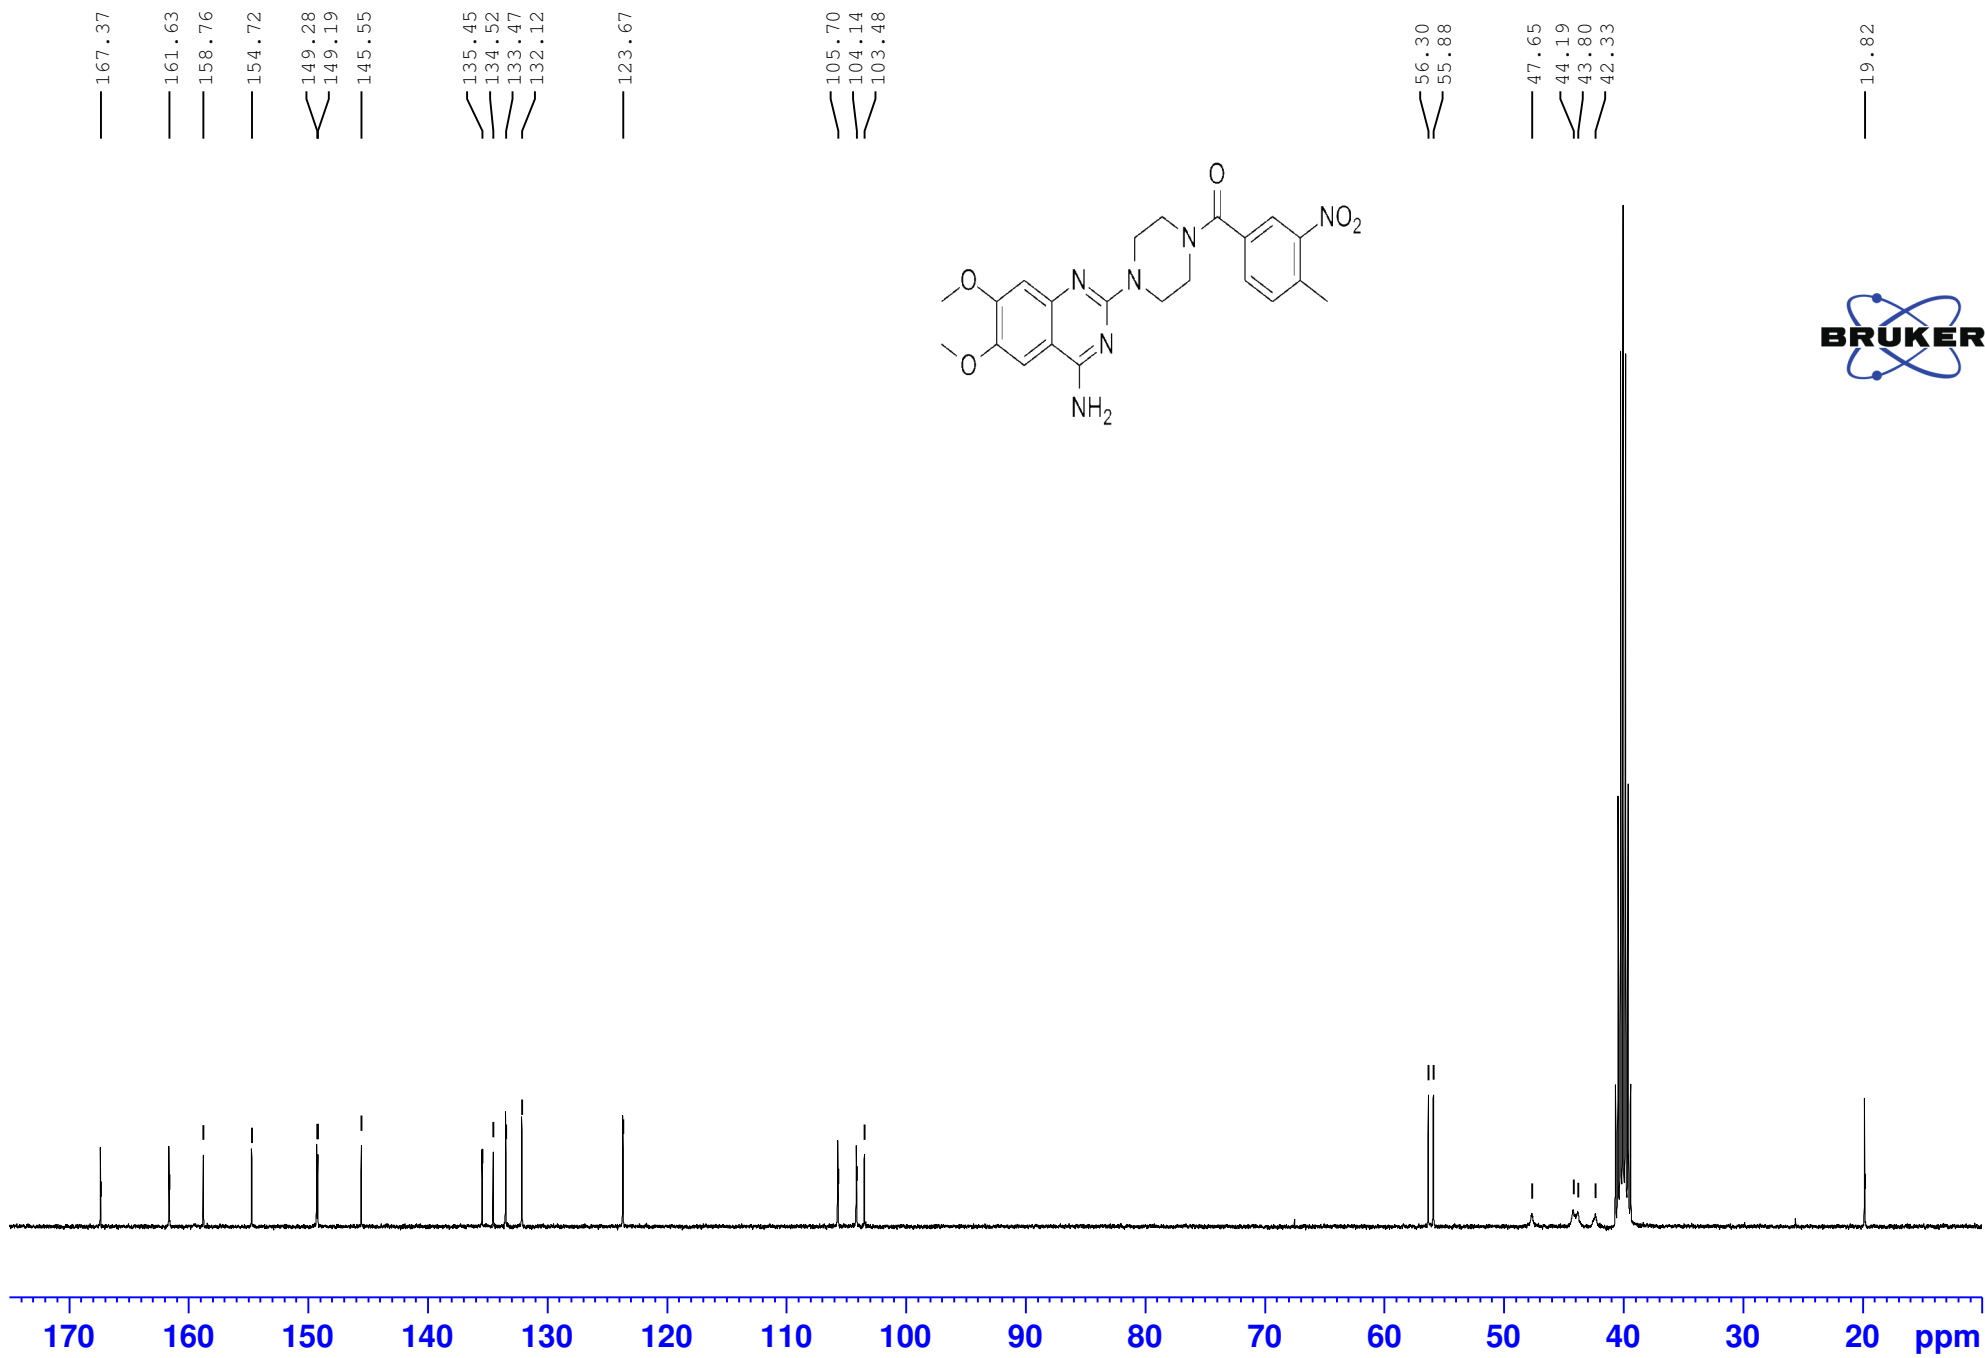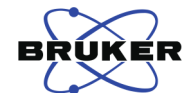

# ==== Shimadzu LabSolutions Data Report ====

Sample ID : 1                      Acquired                      12/20/2019 3:43:55 PM  
Data Filename : CF-F-14.lcd

## <Chromatogram>

Segment#1

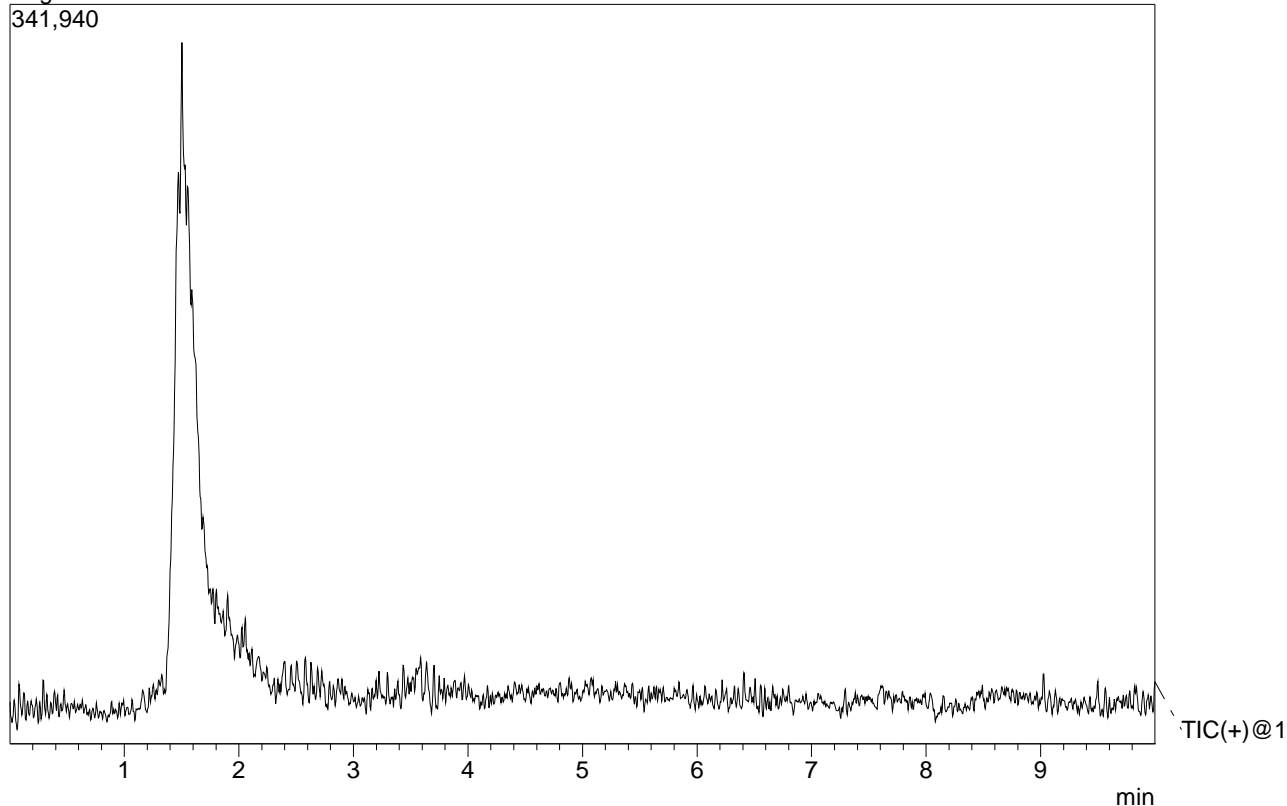

## <Spectrum>

R.Time:----(Scan#:----)  
MassPeaks:726 BasePeak:453.15(32607)  
Spectrum Mode:Averaged 1.365-1.761(391-504)  
BG Mode:None Polarity:Positive Segment 1 - Event 1

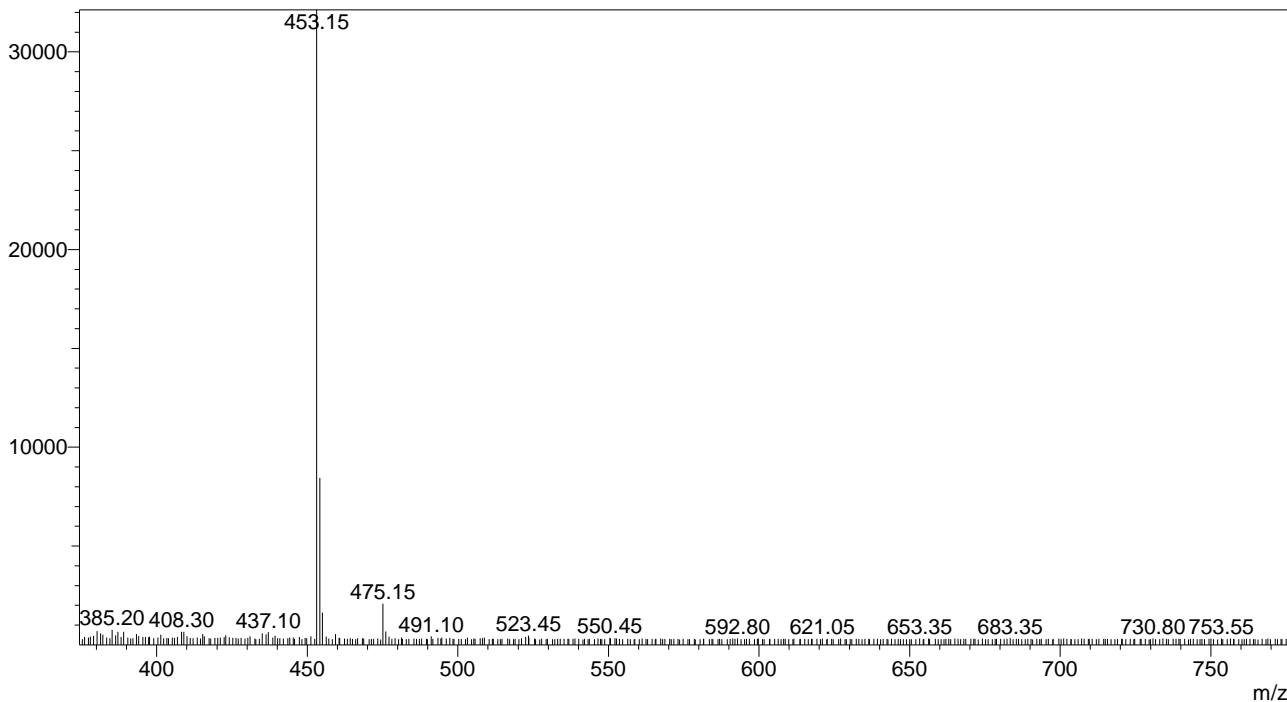



## <Sample Information>

Sample Name : CF\_14  
 Sample ID : CF\_014  
 Data Filename : CF\_Batch\_13\_6\_20\_6182020\_014.lcd  
 Method Filename : PDA\_6\_18\_20\_batch.lcm  
 Batch Filename : CF\_Batch\_13\_6\_20.lcb  
 Vial # : 1-14  
 Injection Volume : 5 uL  
 Date Acquired : 6/18/2020 12:32:09 PM  
 Date Processed : 6/18/2020 12:42:14 PM

Sample Type : Unknown  
 Acquired by : System Administrator  
 Processed by : System Administrator

## <Chromatogram>

mAU

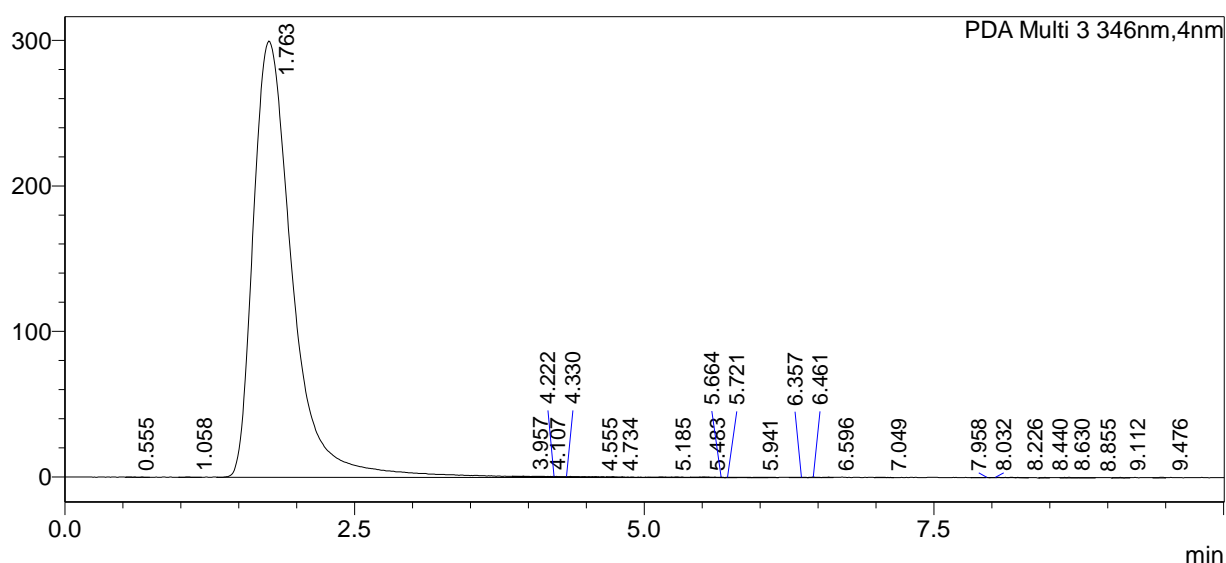

## <Peak Table>

PDA Ch3 346nm

| Peak# | Ret. Time | Area    | Height | Peak Purity Index    |
|-------|-----------|---------|--------|----------------------|
| 1     | 0.555     | 1524    | 306    | cannot be calculated |
| 2     | 1.058     | 1614    | 277    | cannot be calculated |
| 3     | 1.763     | 7046239 | 299932 | 0.999489             |
| 4     | 3.957     | 1341    | 239    | cannot be calculated |
| 5     | 4.107     | 1097    | 223    | cannot be calculated |
| 6     | 4.222     | 1063    | 237    | cannot be calculated |
| 7     | 4.330     | 1840    | 194    | cannot be calculated |
| 8     | 4.555     | 1260    | 227    | cannot be calculated |
| 9     | 4.734     | 1018    | 272    | cannot be calculated |
| 10    | 5.185     | 1671    | 190    | cannot be calculated |
| 11    | 5.483     | 1442    | 278    | cannot be calculated |
| 12    | 5.664     | 1592    | 280    | cannot be calculated |
| 13    | 5.721     | 1138    | 234    | cannot be calculated |
| 14    | 5.941     | 1231    | 221    | cannot be calculated |
| 15    | 6.357     | 1549    | 238    | cannot be calculated |
| 16    | 6.461     | 1216    | 306    | cannot be calculated |
| 17    | 6.596     | 1314    | 290    | cannot be calculated |
| 18    | 7.049     | 1160    | 156    | cannot be calculated |
| 19    | 7.958     | 1146    | 221    | cannot be calculated |
| 20    | 8.032     | 2079    | 102    | cannot be calculated |
| 21    | 8.226     | 1070    | 242    | cannot be calculated |
| 22    | 8.440     | 1004    | 229    | cannot be calculated |

| Peak# | Ret. Time | Area    | Height | Peak Purity Index    |
|-------|-----------|---------|--------|----------------------|
| 23    | 8.630     | 1796    | 286    | cannot be calculated |
| 24    | 8.855     | 1175    | 192    | cannot be calculated |
| 25    | 9.112     | 1169    | 239    | cannot be calculated |
| 26    | 9.476     | 1289    | 298    | cannot be calculated |
| Total |           | 7080035 | 305909 |                      |

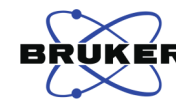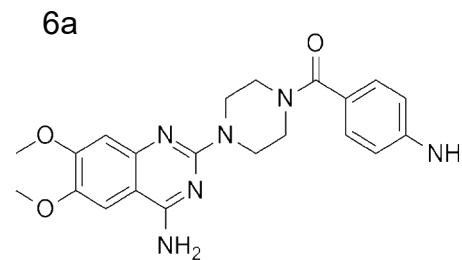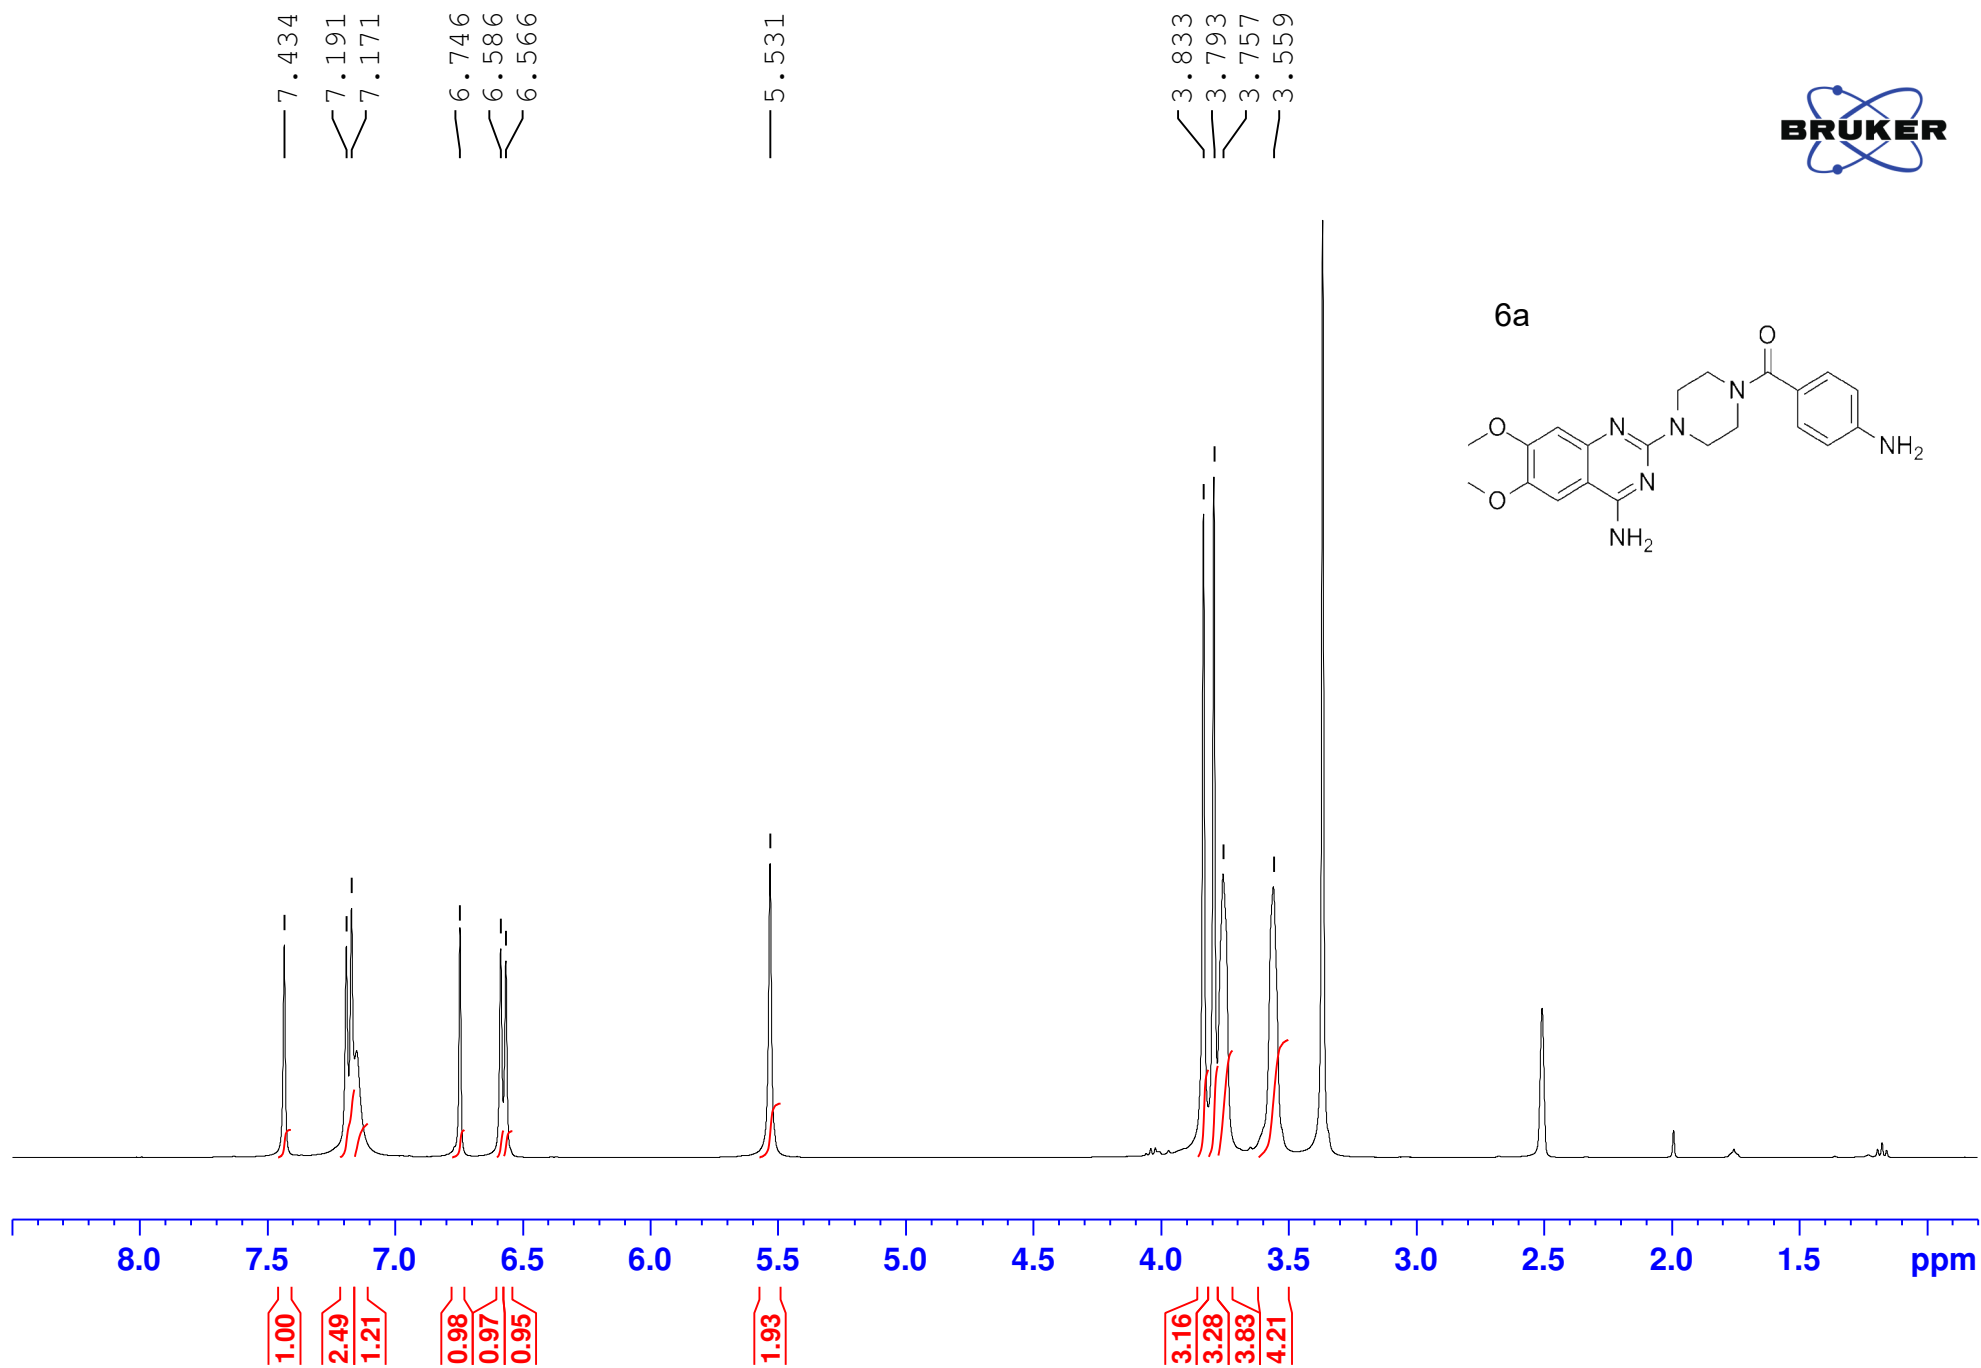

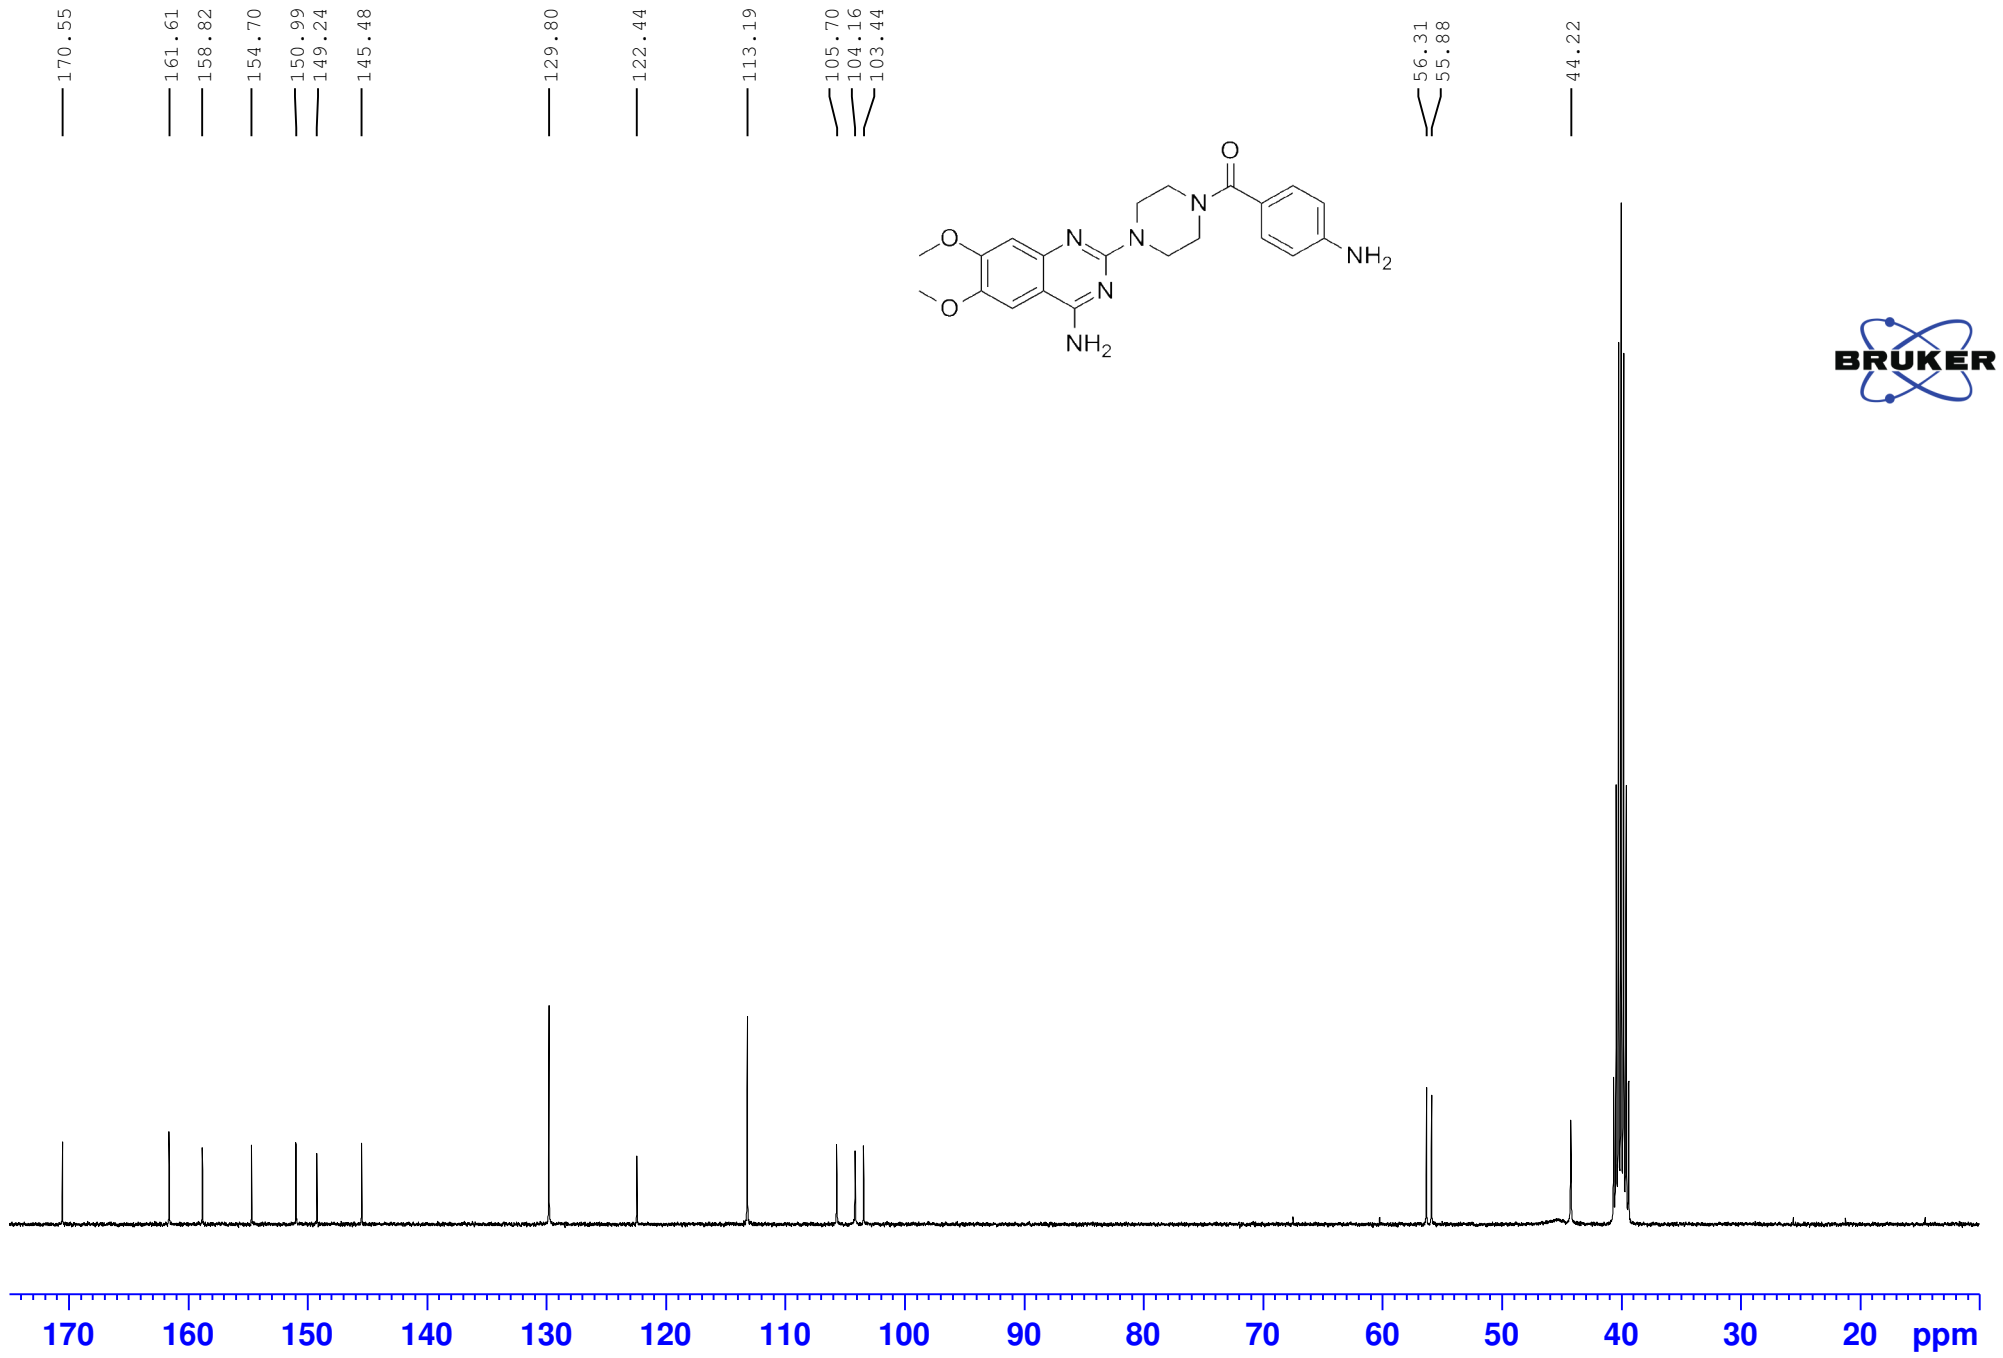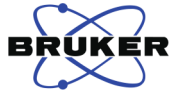

# ==== Shimadzu LabSolutions Data Report ====

Sample ID : 1                      Acquired                      12/23/2019 1:56:46 PM  
Data Filename : CF-F-21.lcd

<Chromatogram>

Segment#1

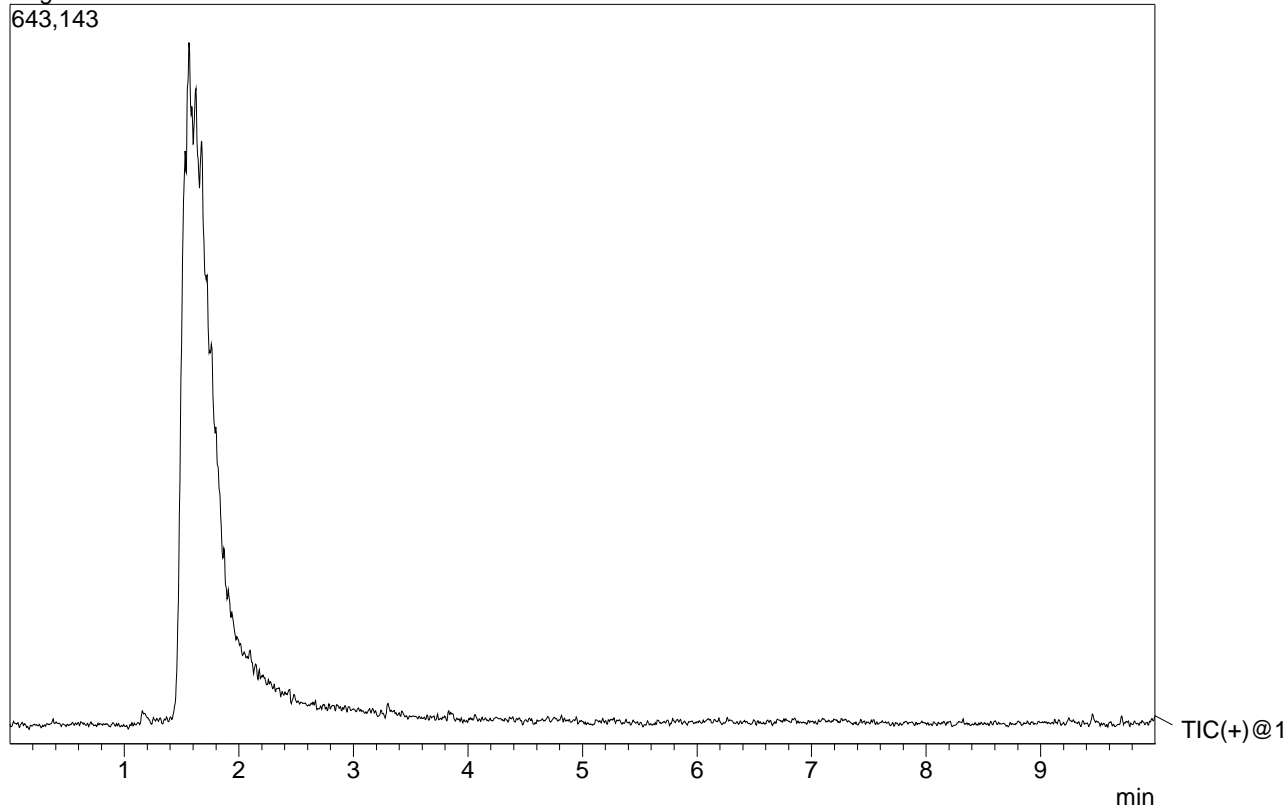

<Spectrum>

R.Time:----(Scan#----)  
MassPeaks:701    BasePeak:409.15(127594)  
Spectrum Mode:Averaged 1.411-2.121(404-607)  
BG Mode:None    Polarity:Positive    Segment 1 - Event 1

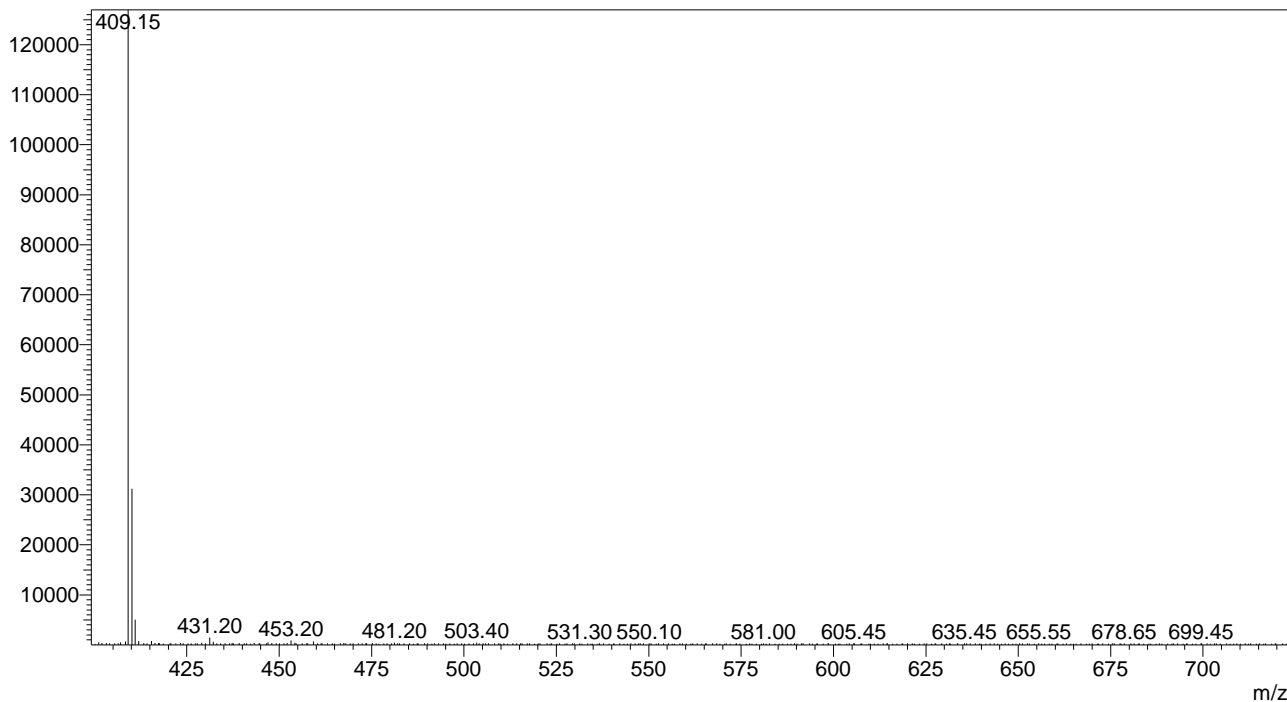



# Analysis Report

## <Sample Information>

Sample Name : CF\_21  
 Sample ID : CF\_021  
 Data Filename : CF\_Batch\_13\_6\_20\_6182020\_021.lcd  
 Method Filename : PDA\_6\_18\_20\_batch.lcm  
 Batch Filename : CF\_Batch\_13\_6\_20.lcb  
 Vial # : 1-21  
 Injection Volume : 5 uL  
 Date Acquired : 6/18/2020 2:06:39 PM  
 Date Processed : 6/18/2020 2:16:44 PM  
 Sample Type : Unknown  
 Acquired by : System Administrator  
 Processed by : System Administrator

## <Chromatogram>

mAU

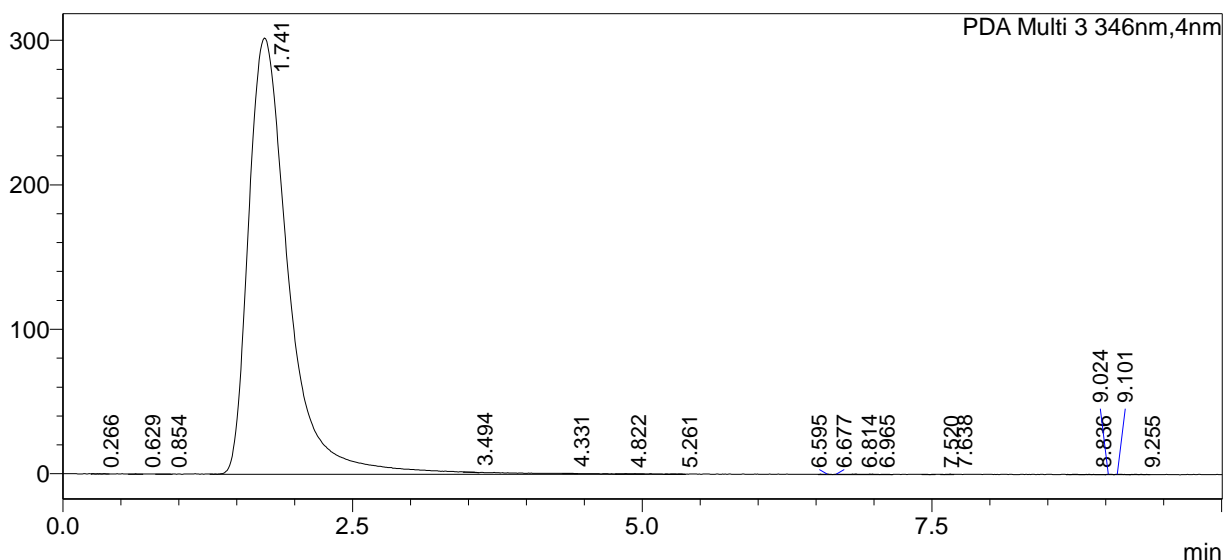

## <Peak Table>

PDA Ch3 346nm

| Peak# | Ret. Time | Area    | Height | Peak Purity Index    |
|-------|-----------|---------|--------|----------------------|
| 1     | 0.266     | 1567    | 276    | Cannot be calculated |
| 2     | 0.629     | 1455    | 269    | Cannot be calculated |
| 3     | 0.854     | 1426    | 311    | Cannot be calculated |
| 4     | 1.741     | 7258187 | 301856 | 0.999504             |
| 5     | 3.494     | 1411    | 233    | Cannot be calculated |
| 6     | 4.331     | 1045    | 200    | Cannot be calculated |
| 7     | 4.822     | 1346    | 95     | Cannot be calculated |
| 8     | 5.261     | 1328    | 216    | Cannot be calculated |
| 9     | 6.595     | 1037    | 289    | Cannot be calculated |
| 10    | 6.677     | 1325    | 298    | Cannot be calculated |
| 11    | 6.814     | 1392    | 265    | Cannot be calculated |
| 12    | 6.965     | 2584    | 288    | Cannot be calculated |
| 13    | 7.520     | 1055    | 215    | Cannot be calculated |
| 14    | 7.638     | 1164    | 213    | Cannot be calculated |
| 15    | 8.836     | 2370    | 170    | Cannot be calculated |
| 16    | 9.024     | 1186    | 348    | Cannot be calculated |
| 17    | 9.101     | 1510    | 244    | Cannot be calculated |
| 18    | 9.255     | 1688    | 345    | Cannot be calculated |
| Total |           | 7283076 | 306131 |                      |

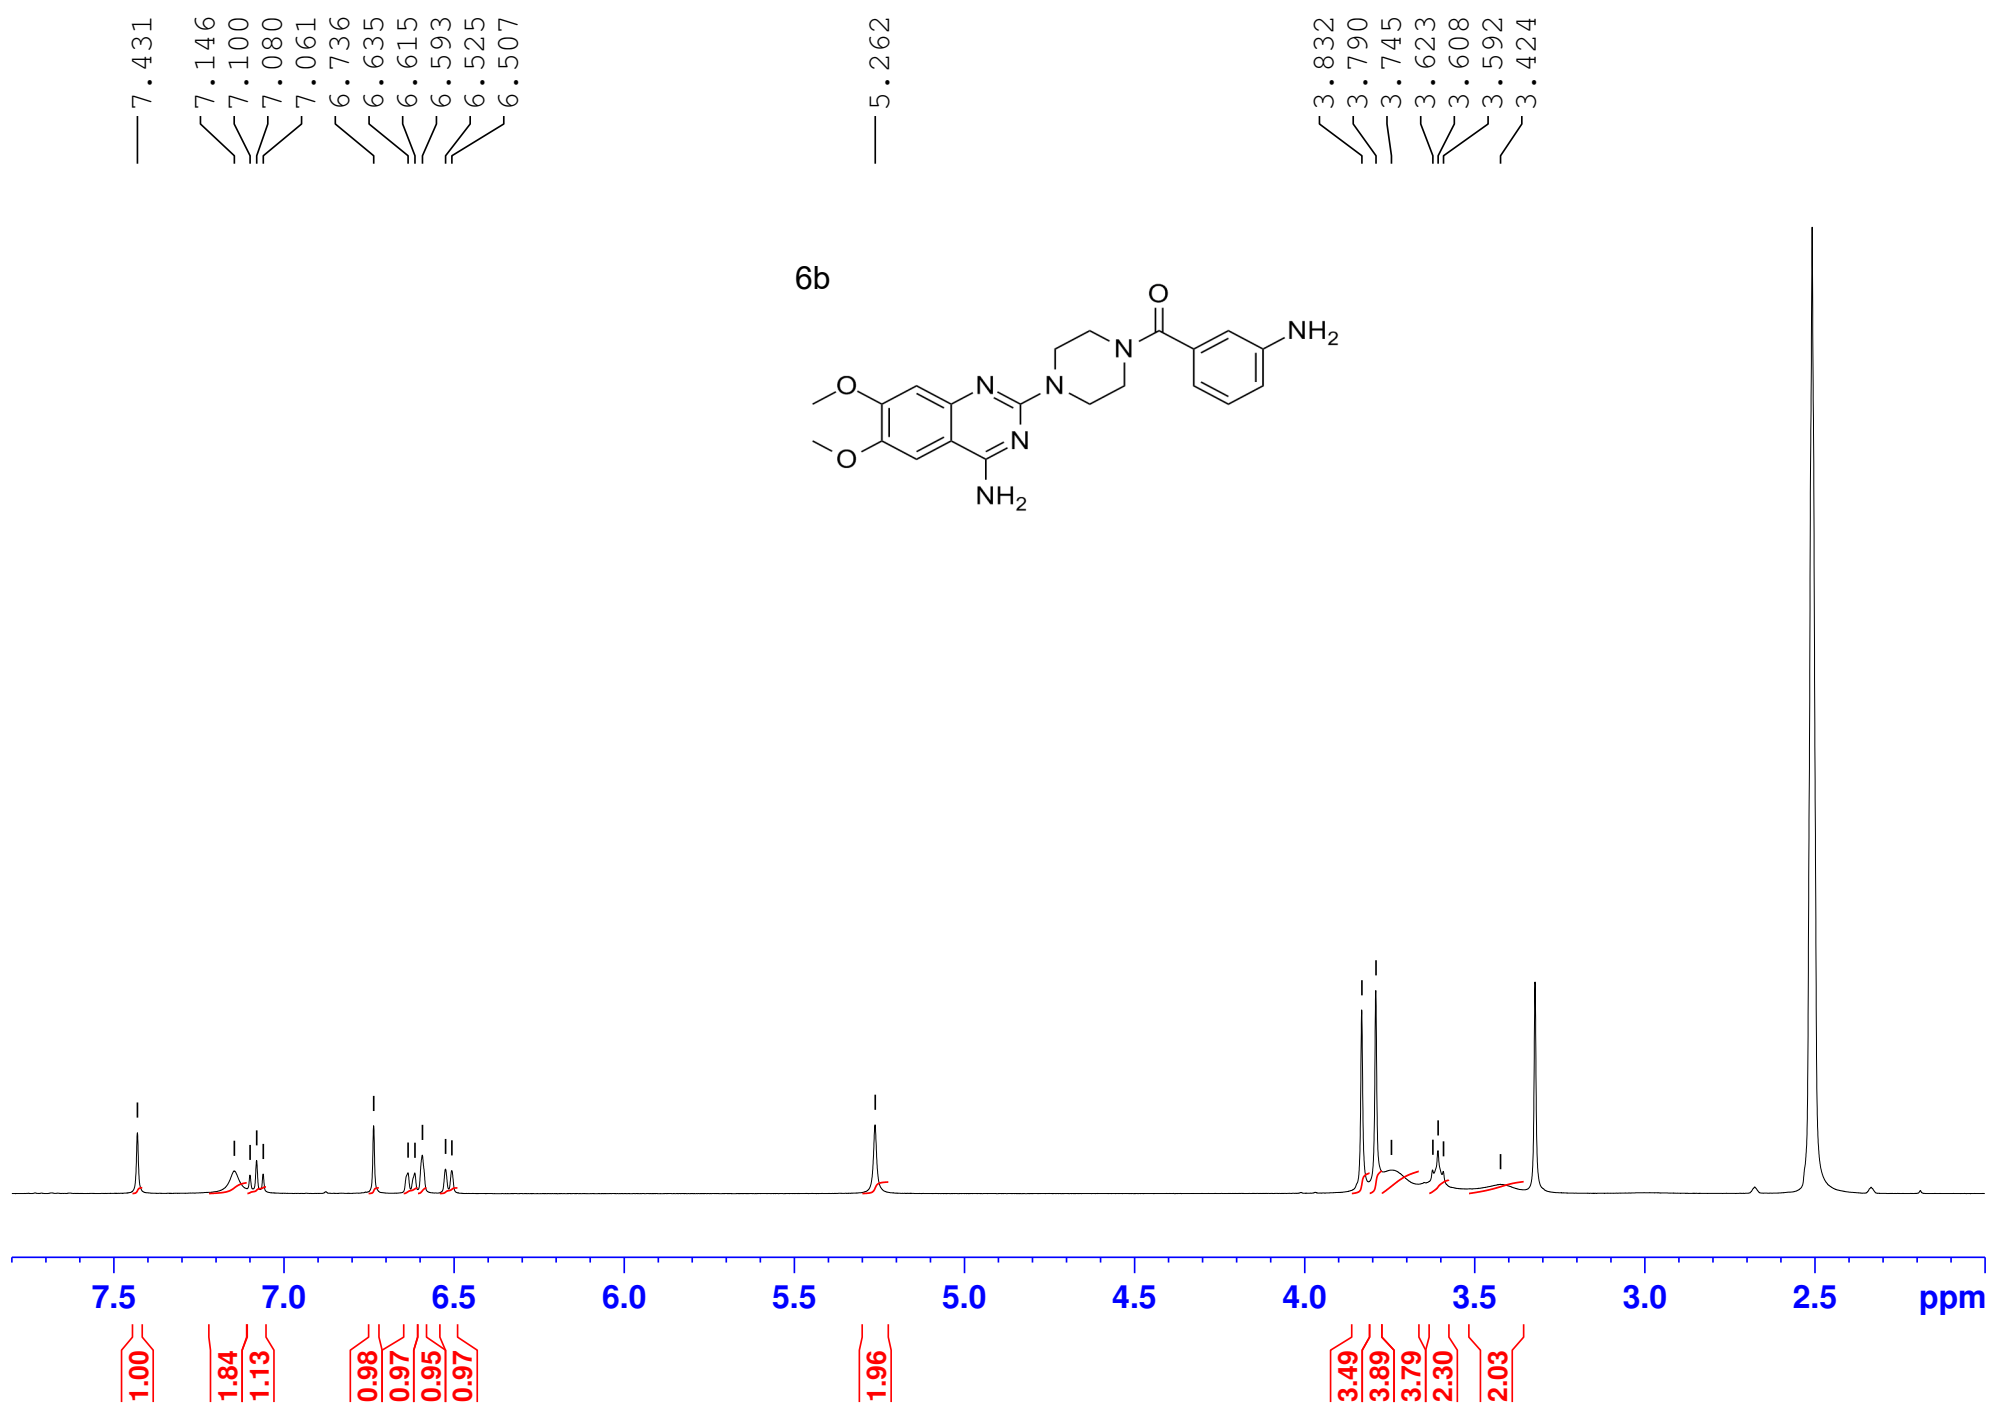

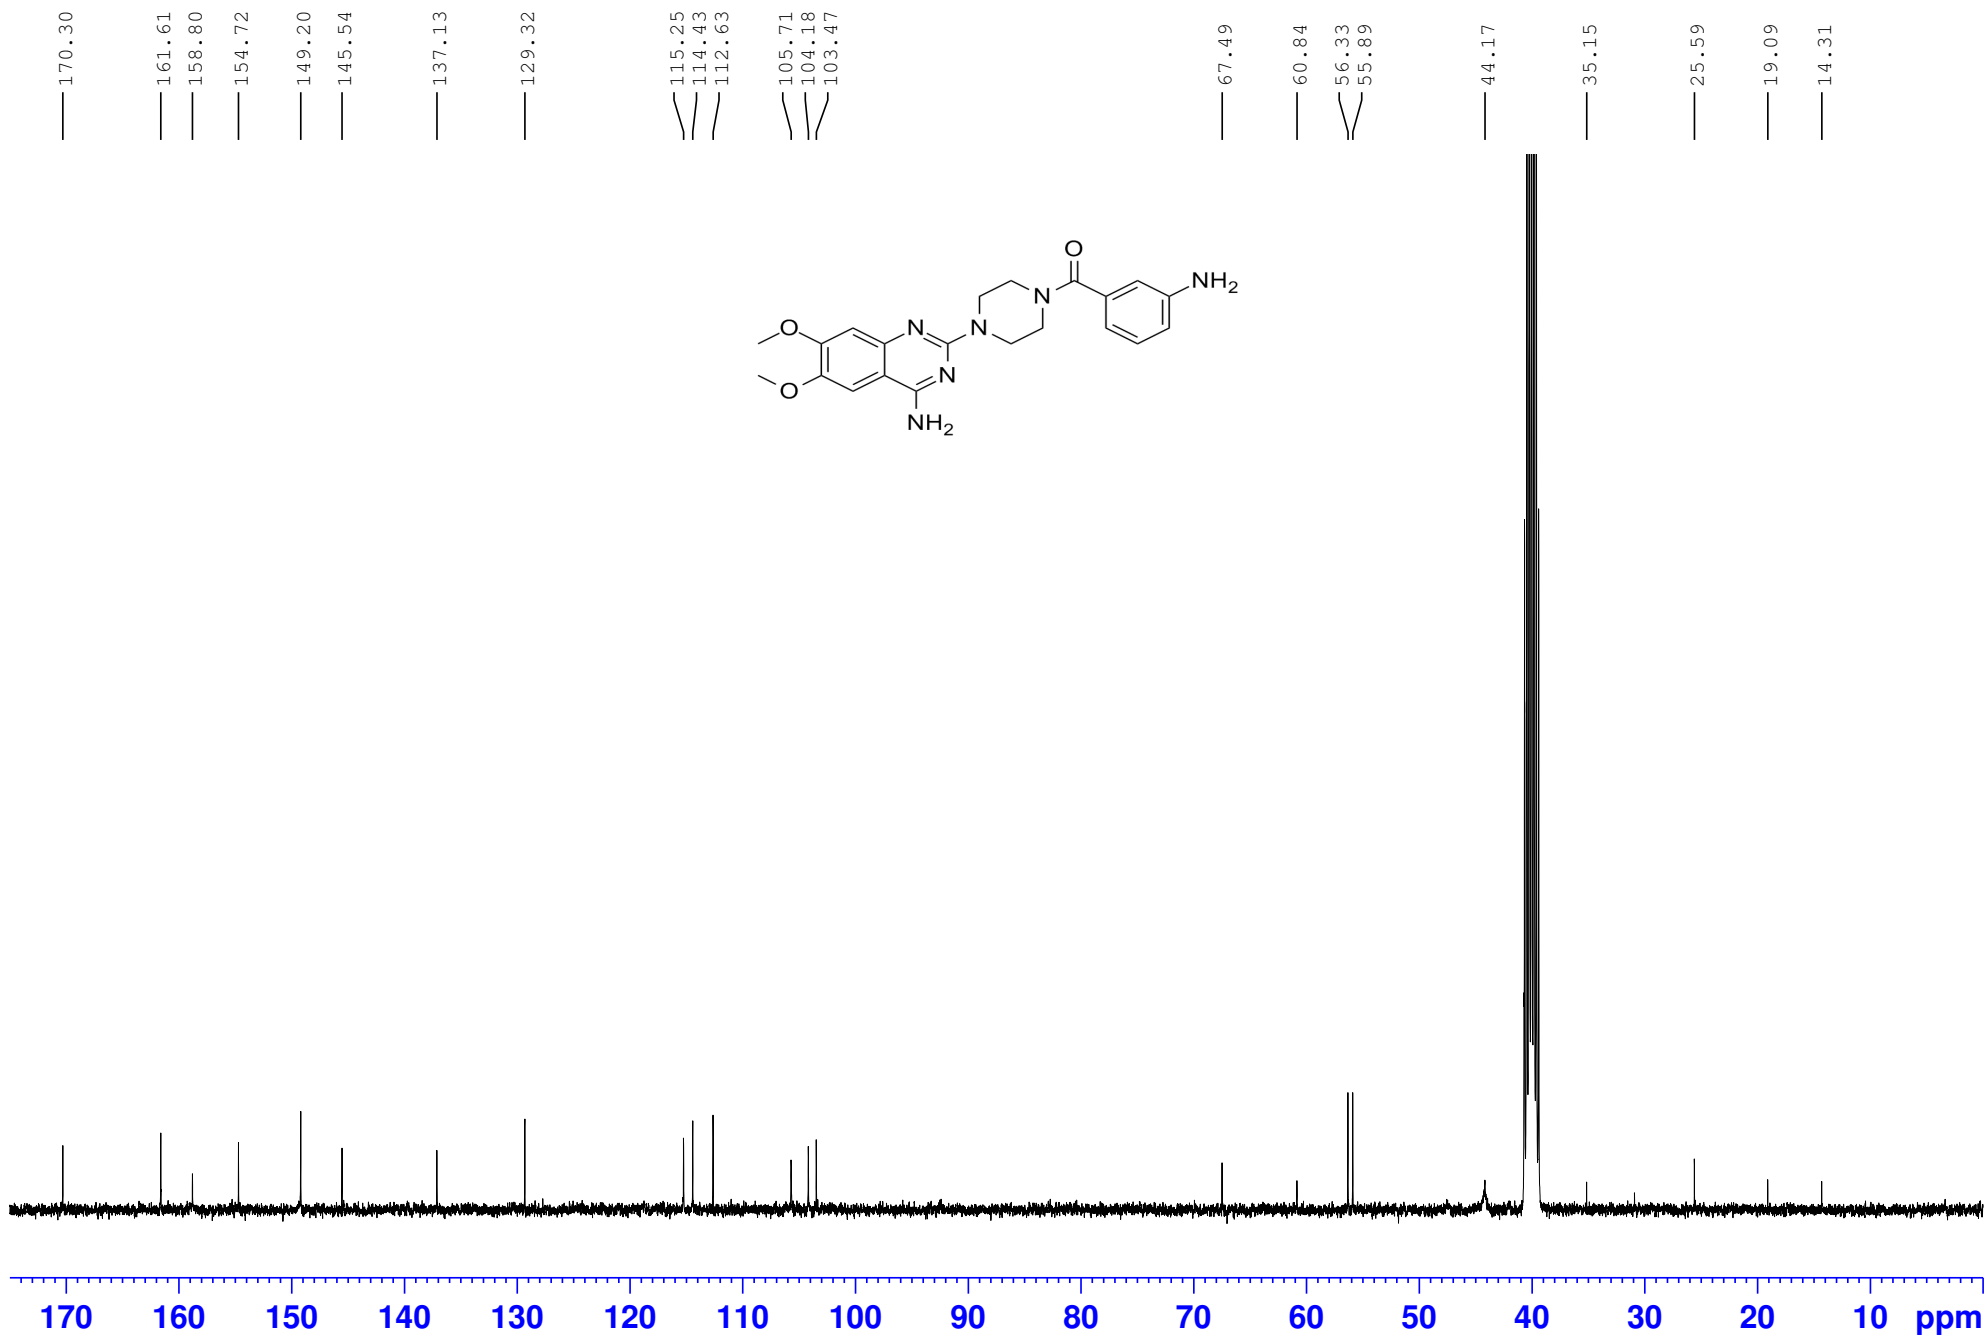



# ==== Shimadzu LabSolutions Data Report ====

Sample ID : 1                      Acquired                      1/10/2020 1:33:42 AM  
Data Filename : CF-F-08.lcd

## <Chromatogram>

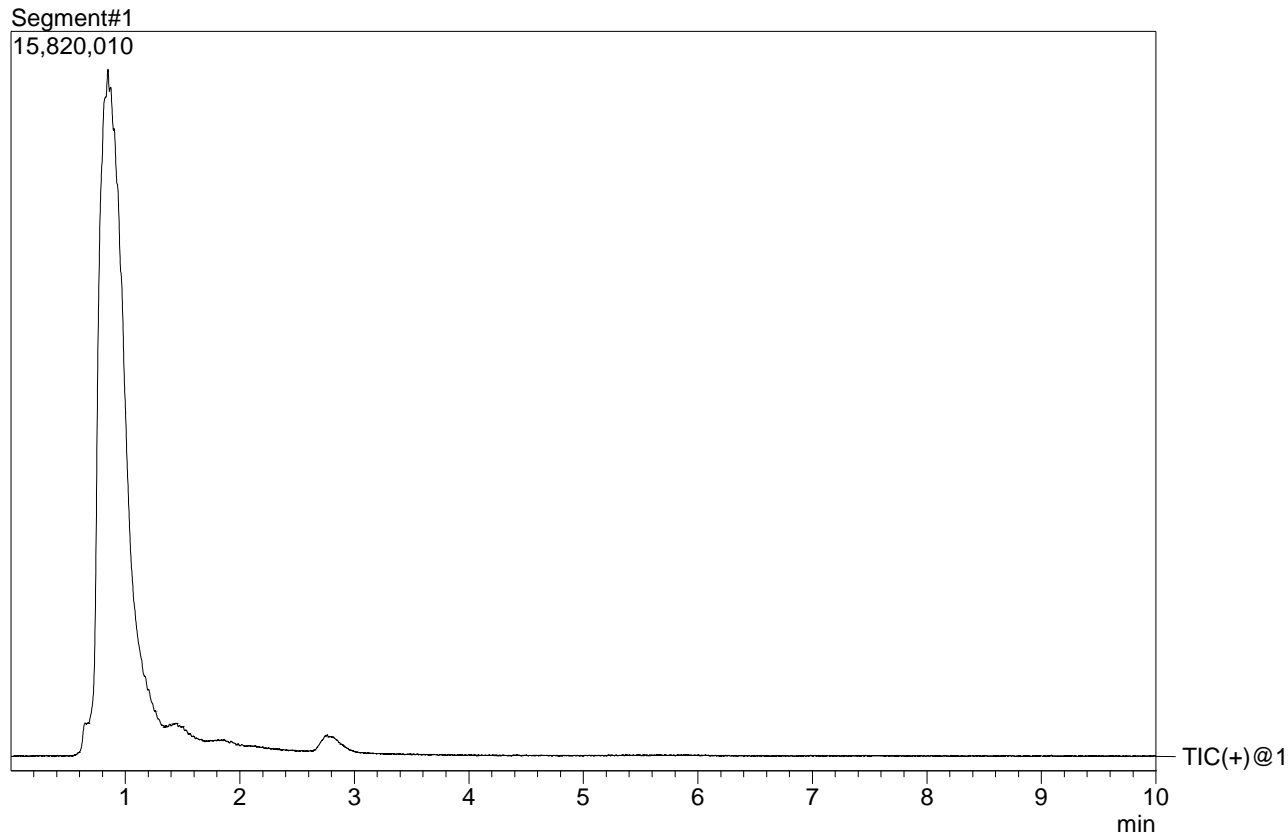

## <Spectrum>

R.Time:----(Scan#:----)  
MassPeaks:401    BasePeak:409.05(2703922)  
Spectrum Mode:Averaged 0.602-1.457(362-875)  
BG Mode:None    Polarity:Positive    Segment 1 - Event 1

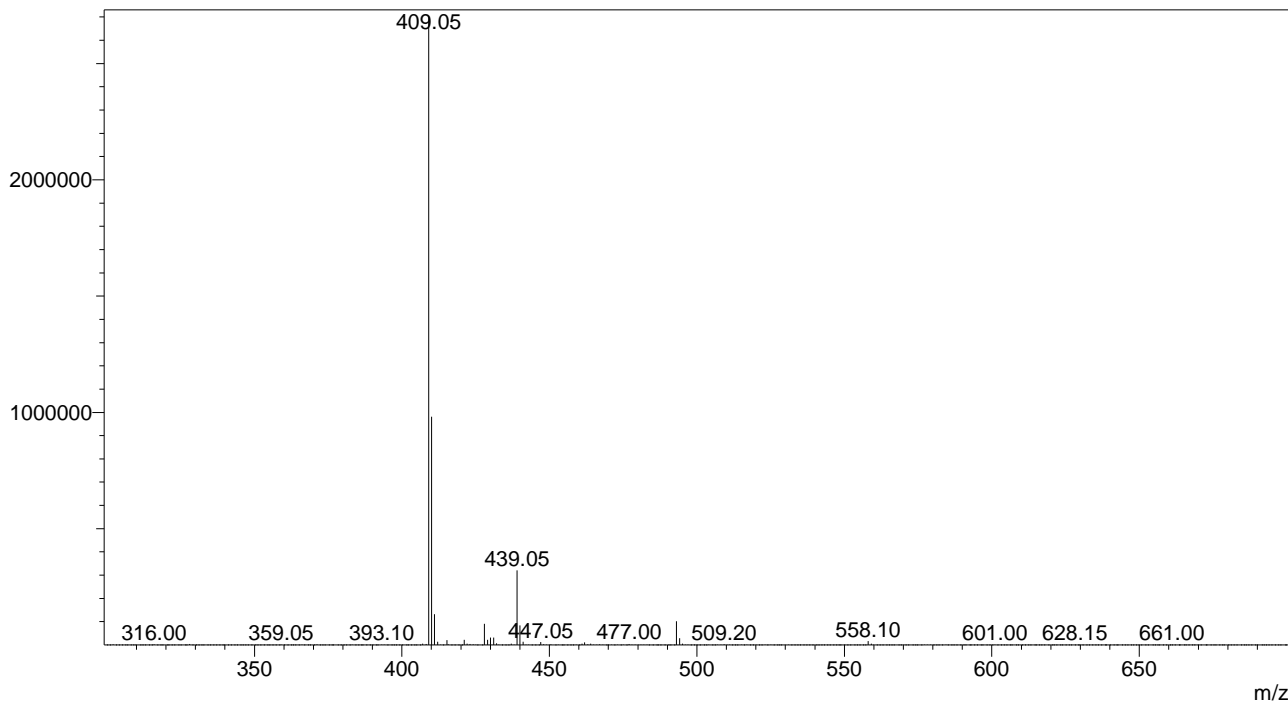



# Analysis Report

## <Sample Information>

Sample Name : CF\_08  
 Sample ID : CF\_008  
 Data Filename : CF\_Batch\_13\_6\_20\_6182020\_008.lcd  
 Method Filename : PDA\_6\_18\_20\_batch.lcm  
 Batch Filename : CF\_Batch\_13\_6\_20.lcb  
 Vial # : 1-8  
 Injection Volume : 5 uL  
 Date Acquired : 6/18/2020 11:18:40 AM  
 Date Processed : 6/27/2020 9:00:00 PM  
 Sample Type : Unknown  
 Acquired by : System Administrator  
 Processed by : System Administrator

## <Chromatogram>

mAU

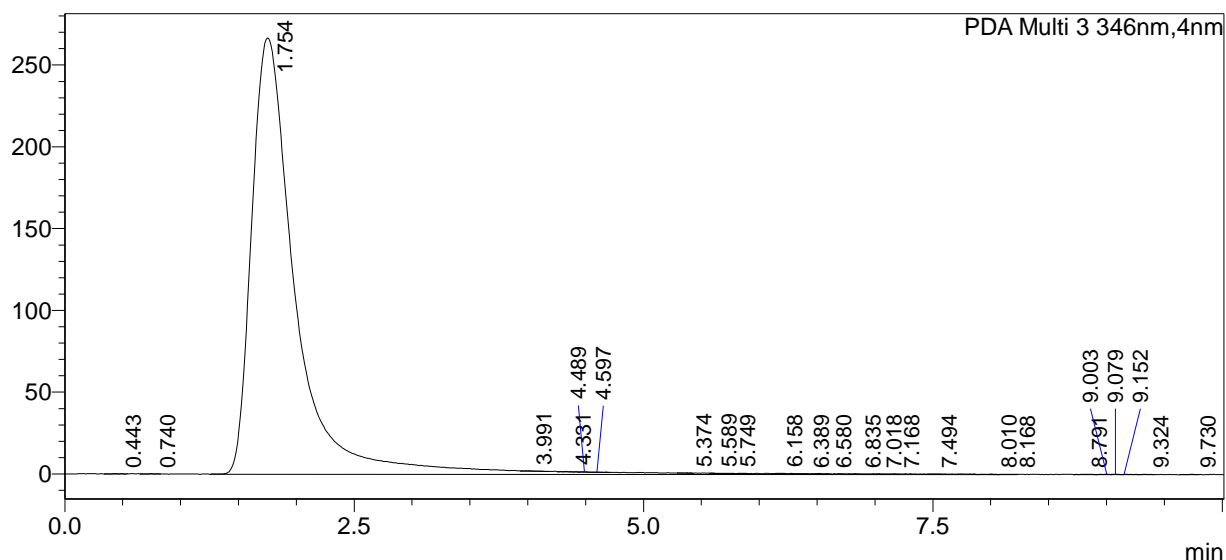

## <Peak Table>

PDA Ch3 346nm

| Peak# | Ret. Time | Area    | Height | Peak Purity Index    |
|-------|-----------|---------|--------|----------------------|
| 1     | 0.443     | 1448    | 261    | Cannot be calculated |
| 2     | 0.740     | 1403    | 234    | Cannot be calculated |
| 3     | 1.754     | 7085124 | 266684 | 0.999455             |
| 4     | 3.991     | 2237    | 296    | Cannot be calculated |
| 5     | 4.331     | 1451    | 241    | Cannot be calculated |
| 6     | 4.489     | 1280    | 356    | Cannot be calculated |
| 7     | 4.597     | 1509    | 231    | Cannot be calculated |
| 8     | 5.374     | 1099    | 273    | Cannot be calculated |
| 9     | 5.589     | 1110    | 190    | Cannot be calculated |
| 10    | 5.749     | 1824    | 222    | Cannot be calculated |
| 11    | 6.158     | 1695    | 309    | Cannot be calculated |
| 12    | 6.389     | 1492    | 233    | Cannot be calculated |
| 13    | 6.580     | 1889    | 222    | Cannot be calculated |
| 14    | 6.835     | 1165    | 271    | Cannot be calculated |
| 15    | 7.018     | 1333    | 253    | Cannot be calculated |
| 16    | 7.168     | 1445    | 250    | Cannot be calculated |
| 17    | 7.494     | 1590    | 286    | Cannot be calculated |
| 18    | 8.010     | 1536    | 243    | Cannot be calculated |
| 19    | 8.168     | 1046    | 195    | Cannot be calculated |
| 20    | 8.791     | 1892    | 252    | Cannot be calculated |
| 21    | 9.003     | 1192    | 280    | Cannot be calculated |
| 22    | 9.079     | 1060    | 266    | Cannot be calculated |

| Peak# | Ret. Time | Area    | Height | Peak Purity Index    |
|-------|-----------|---------|--------|----------------------|
| 23    | 9.152     | 1303    | 295    | Cannot be calculated |
| 24    | 9.324     | 1377    | 325    | Cannot be calculated |
| 25    | 9.730     | 1224    | 217    | Cannot be calculated |
| Total |           | 7119725 | 272887 |                      |

7.432  
7.146  
7.110  
7.043  
6.737  
6.582

5.194

3.829  
3.788  
3.527

6c

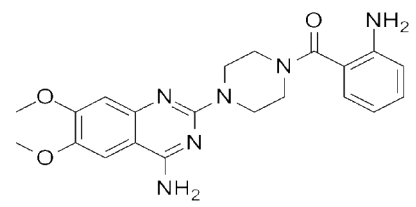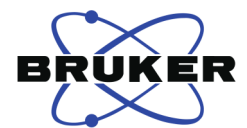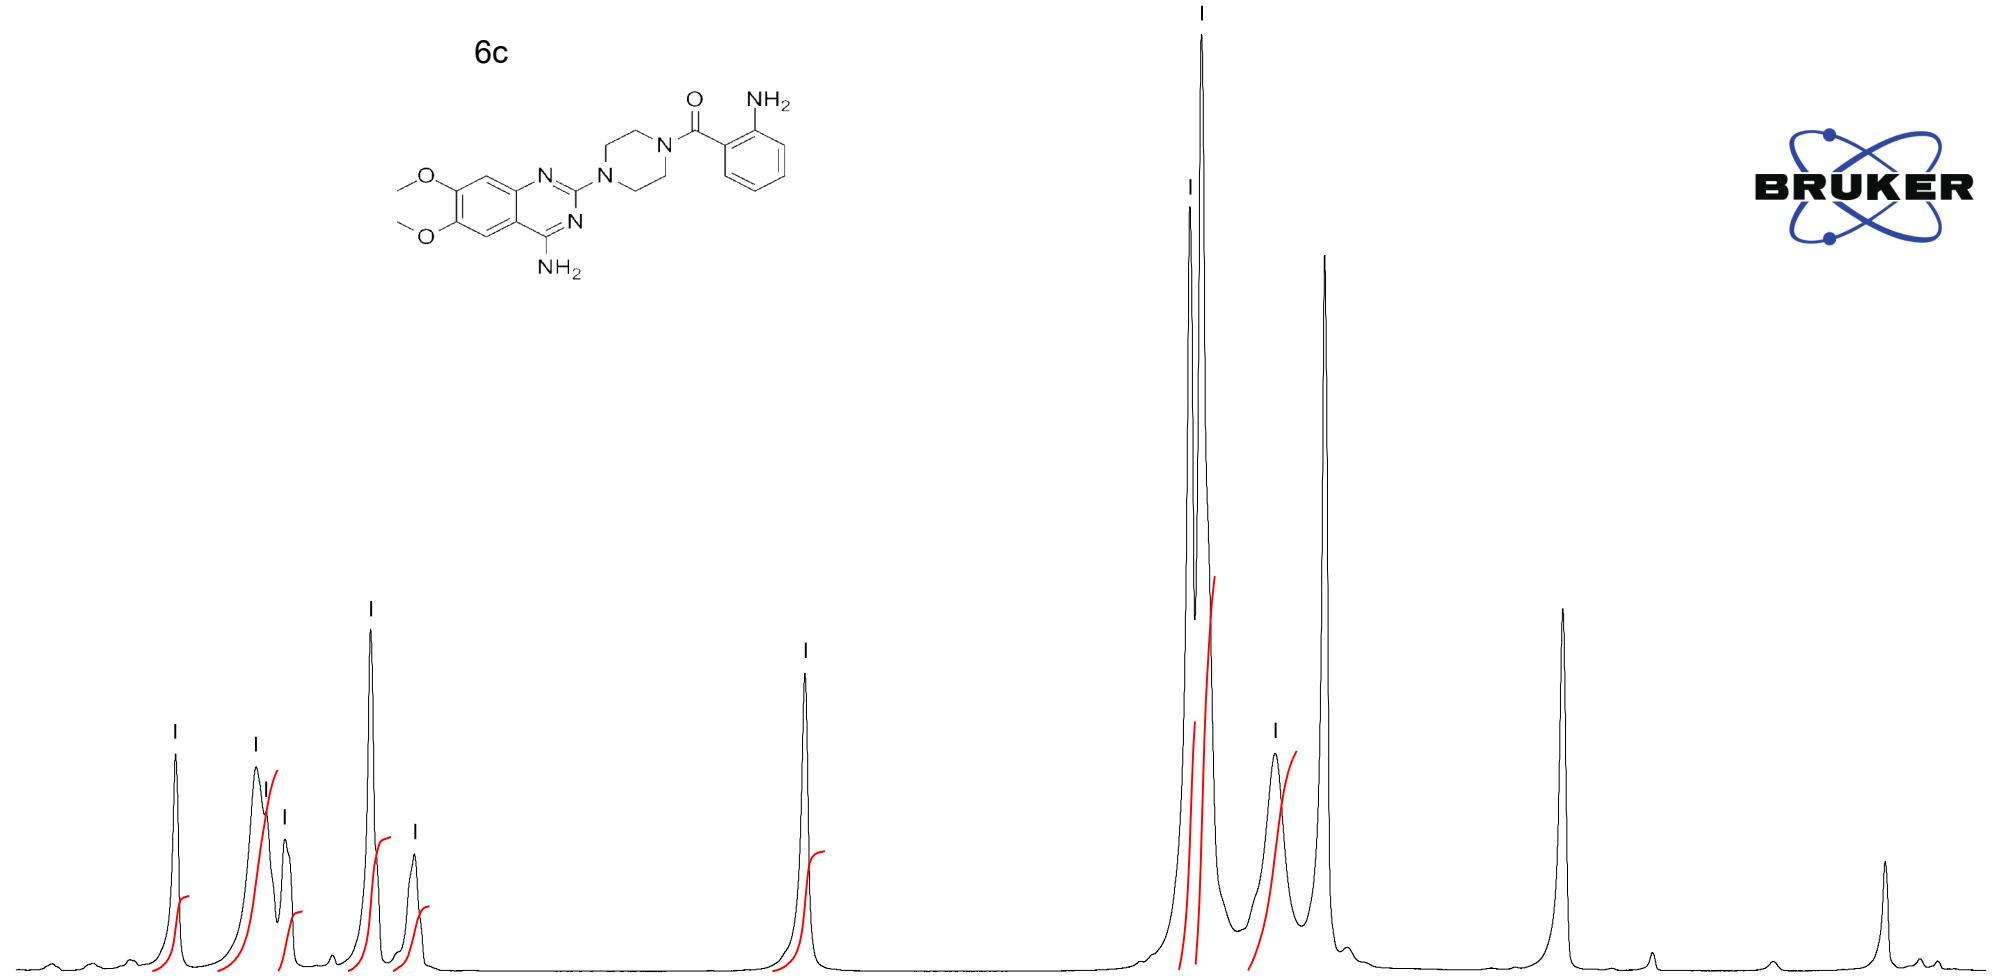

1.26  
3.36  
1.00  
2.24  
1.08

2.00

4.20  
6.60  
3.68

7.5 7.0 6.5 6.0 5.5 5.0 4.5 4.0 3.5 3.0 2.5 2.0 1.5 ppm

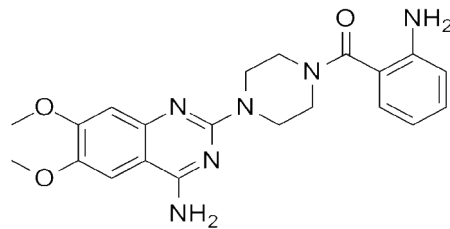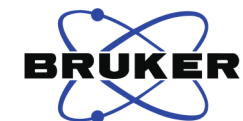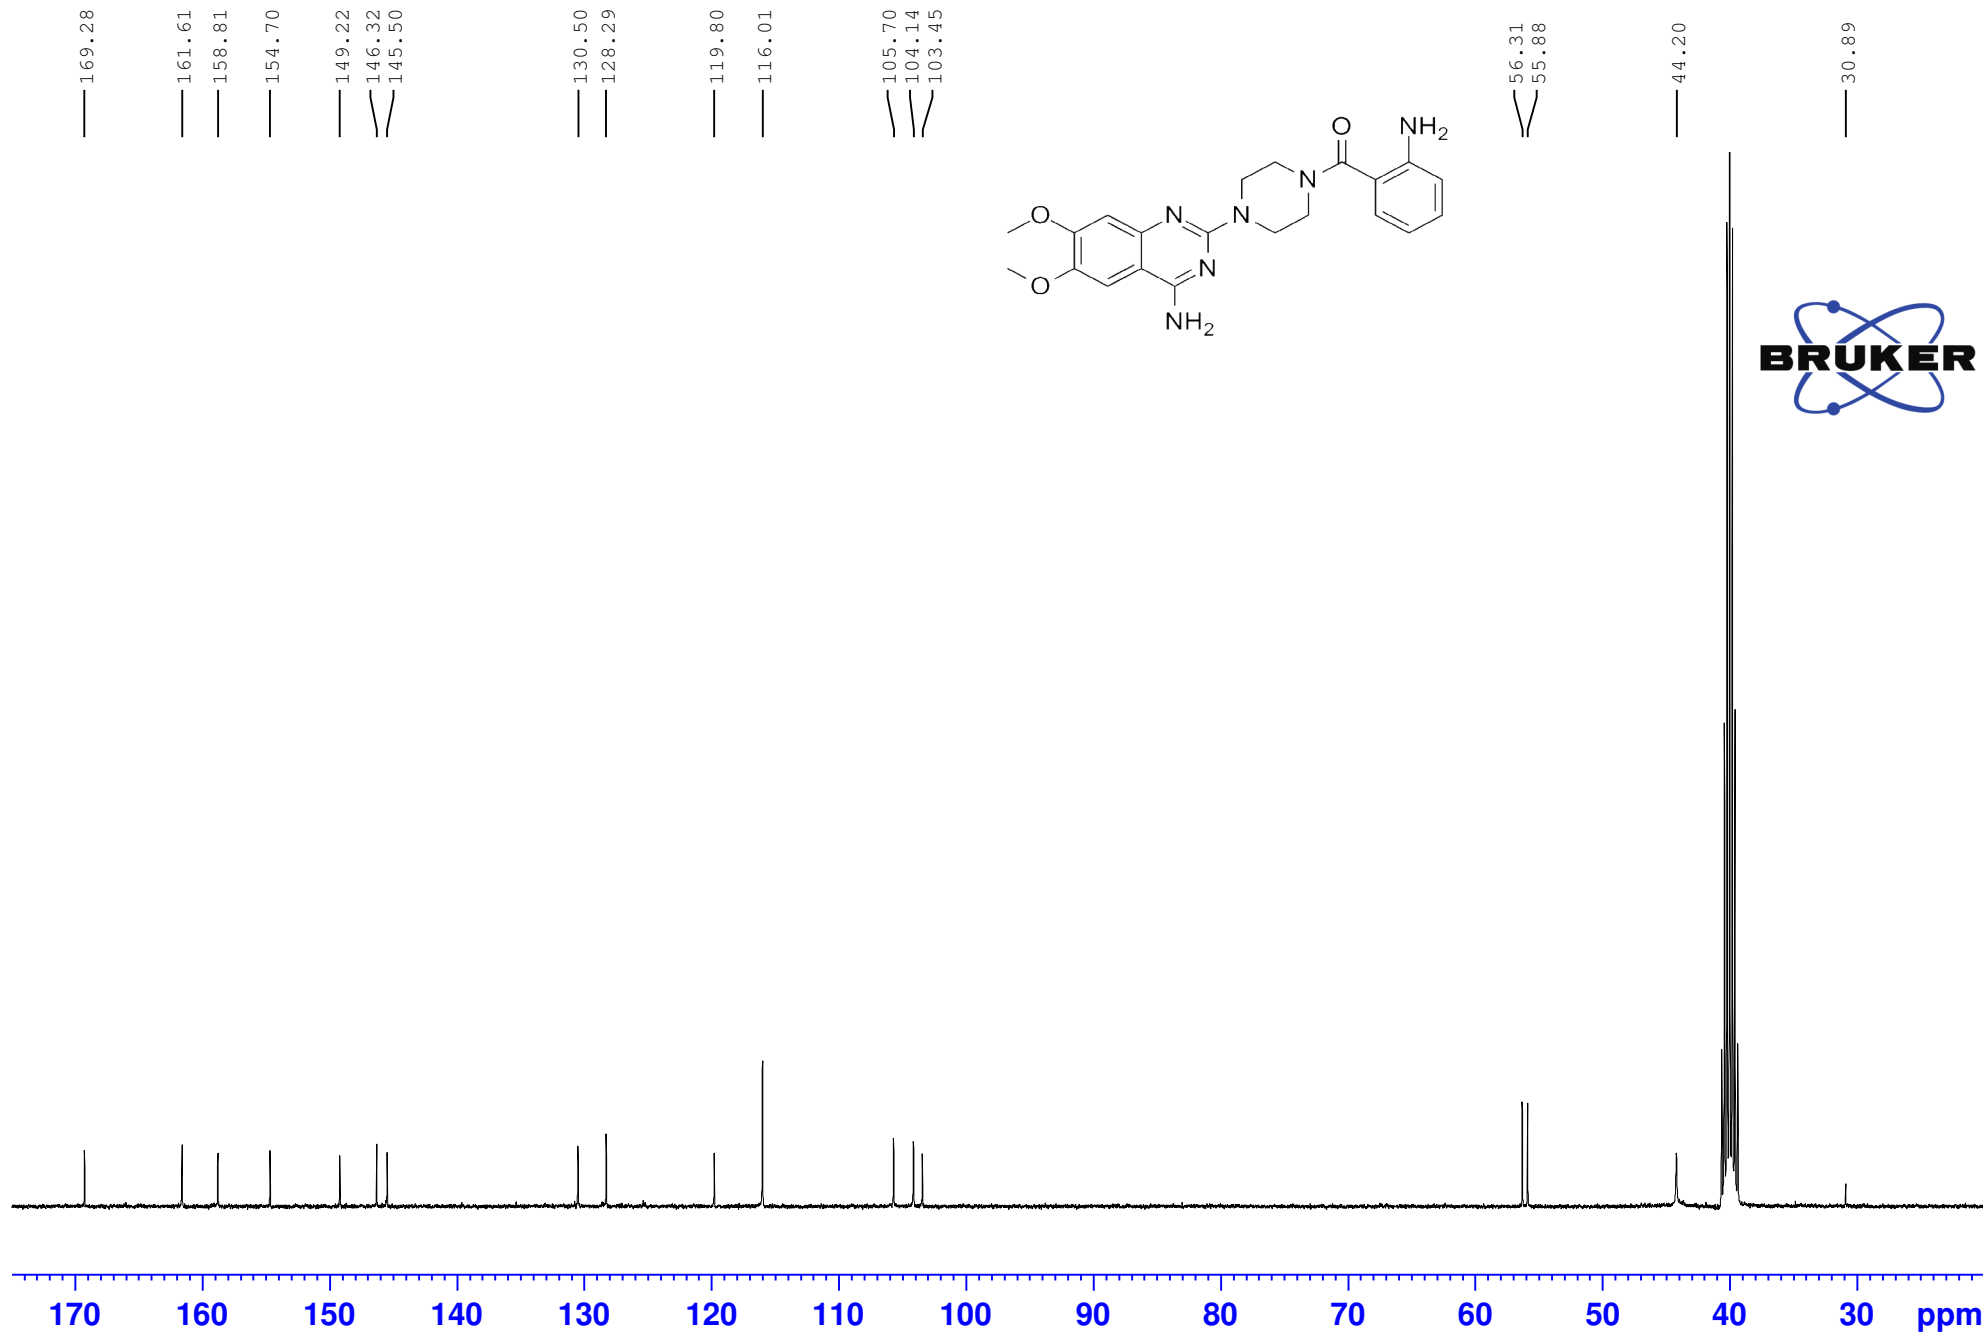

## ==== Shimadzu LabSolutions Data Report ====

Sample ID : 1 Acquired 12/23/2019 1:34:14 PM  
Data Filename : CF-F-19.lcd

<Chromatogram>

Segment#1

960,859

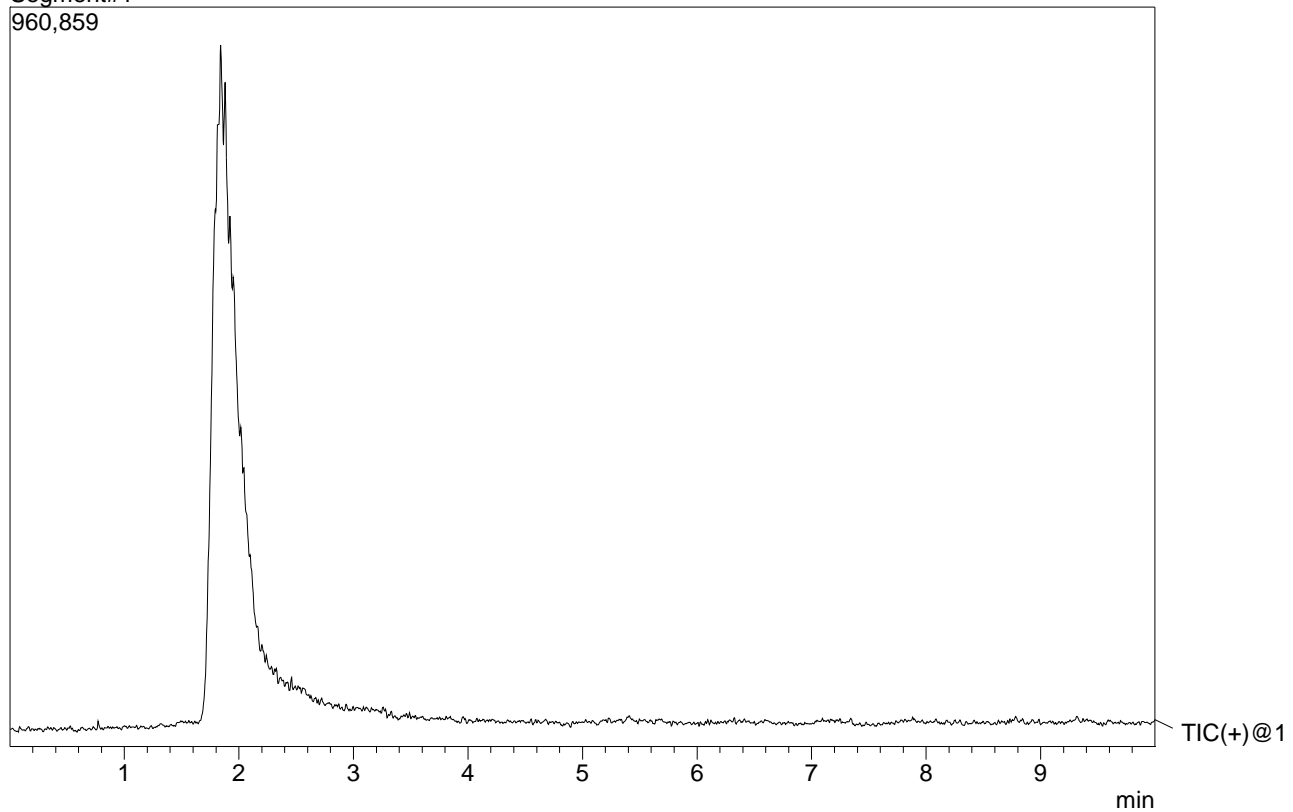

<Spectrum>

R.Time:----(Scan#:----)

MassPeaks:701 BasePeak:409.15(193950)

Spectrum Mode:Averaged 1.673-2.310(479-661)

BG Mode:None Polarity:Positive Segment 1 - Event 1

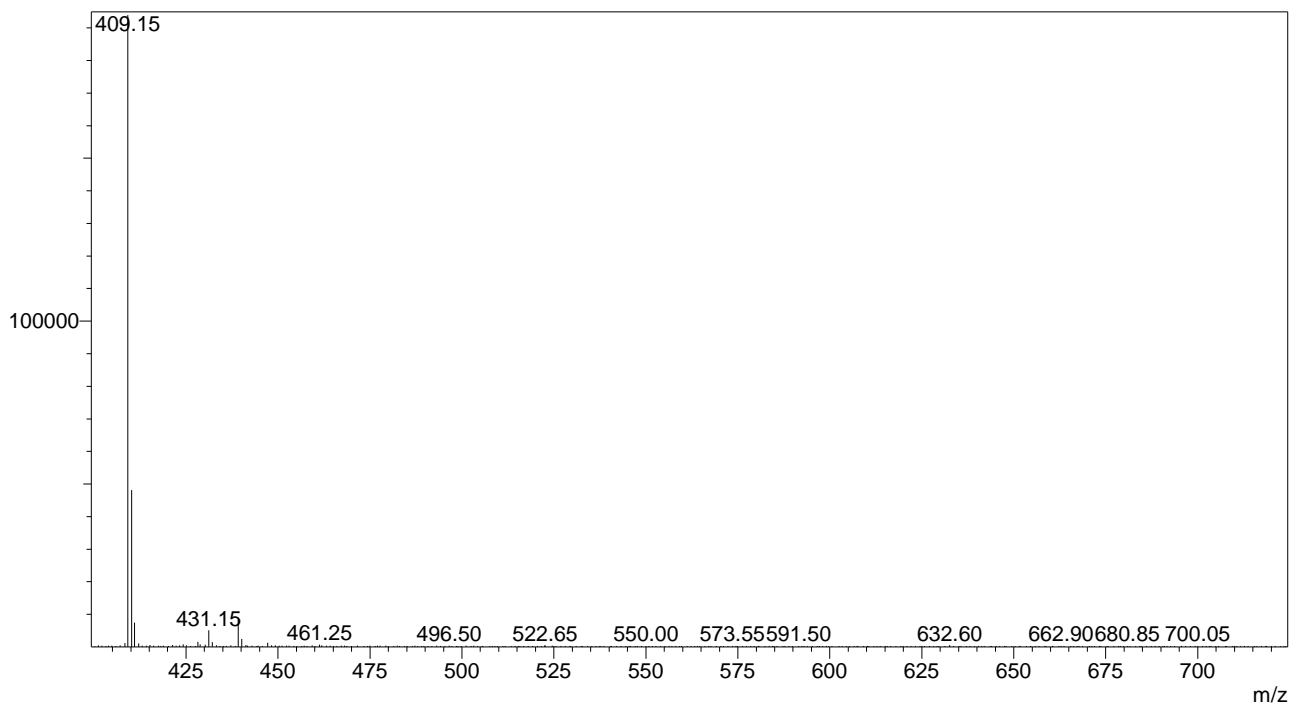



# Analysis Report

## <Sample Information>

Sample Name : CF\_19  
 Sample ID : CF\_019  
 Data Filename : CF\_Batch\_13\_6\_20\_6182020\_019.lcd  
 Method Filename : PDA\_6\_18\_20\_batch.lcm  
 Batch Filename : CF\_Batch\_13\_6\_20.lcb  
 Vial # : 1-19  
 Injection Volume : 5 uL  
 Date Acquired : 6/18/2020 1:35:08 PM  
 Date Processed : 6/18/2020 1:45:14 PM  
 Sample Type : Unknown  
 Acquired by : System Administrator  
 Processed by : System Administrator

## <Chromatogram>

mAU

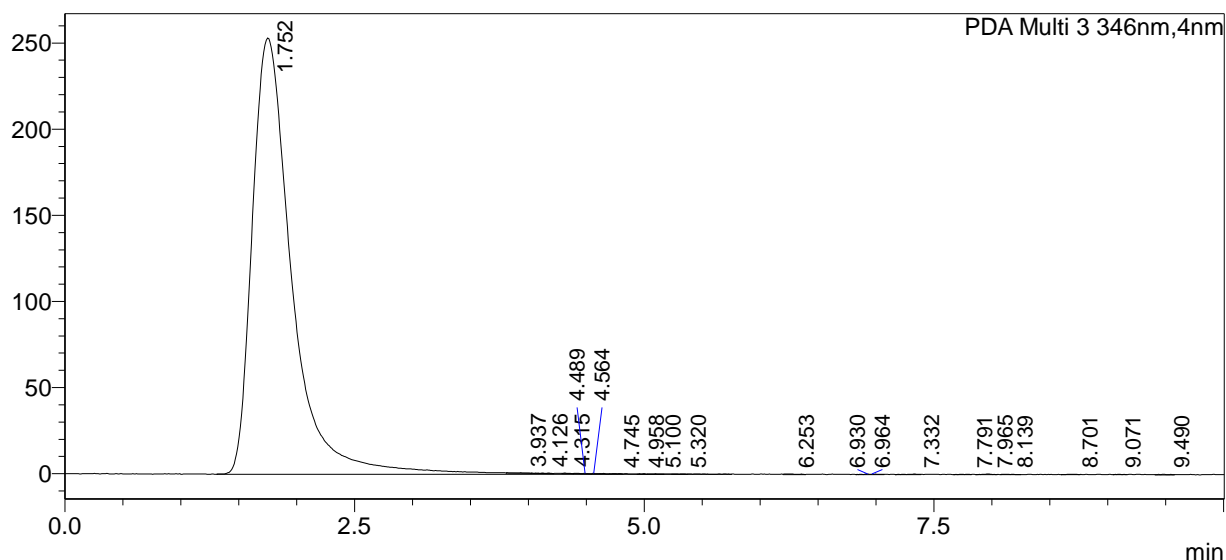

## <Peak Table>

PDA Ch3 346nm

| Peak# | Ret. Time | Area    | Height | Peak Purity Index    |
|-------|-----------|---------|--------|----------------------|
| 1     | 1.752     | 6007024 | 253179 | 0.999419             |
| 2     | 3.937     | 1154    | 214    | Cannot be calculated |
| 3     | 4.126     | 1480    | 243    | Cannot be calculated |
| 4     | 4.315     | 1138    | 308    | Cannot be calculated |
| 5     | 4.489     | 1563    | 304    | Cannot be calculated |
| 6     | 4.564     | 1014    | 292    | Cannot be calculated |
| 7     | 4.745     | 1745    | 178    | Cannot be calculated |
| 8     | 4.958     | 1012    | 242    | Cannot be calculated |
| 9     | 5.100     | 1687    | 291    | Cannot be calculated |
| 10    | 5.320     | 1301    | 217    | Cannot be calculated |
| 11    | 6.253     | 2434    | 291    | Cannot be calculated |
| 12    | 6.930     | 1146    | 252    | Cannot be calculated |
| 13    | 6.964     | 1449    | 230    | Cannot be calculated |
| 14    | 7.332     | 2345    | 306    | Cannot be calculated |
| 15    | 7.791     | 1046    | 230    | Cannot be calculated |
| 16    | 7.965     | 1568    | 317    | Cannot be calculated |
| 17    | 8.139     | 1153    | 220    | Cannot be calculated |
| 18    | 8.701     | 1348    | 241    | Cannot be calculated |
| 19    | 9.071     | 1262    | 189    | Cannot be calculated |
| 20    | 9.490     | 1821    | 238    | Cannot be calculated |
| Total |           | 6034689 | 257982 |                      |

7.442

7.251

7.176

6.842

6.739

6.573

5.566

3.830

3.788

3.644

6d

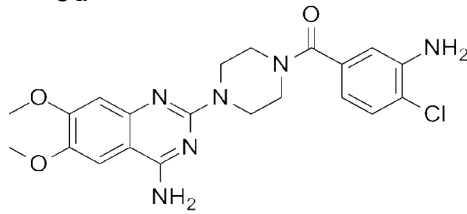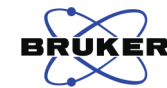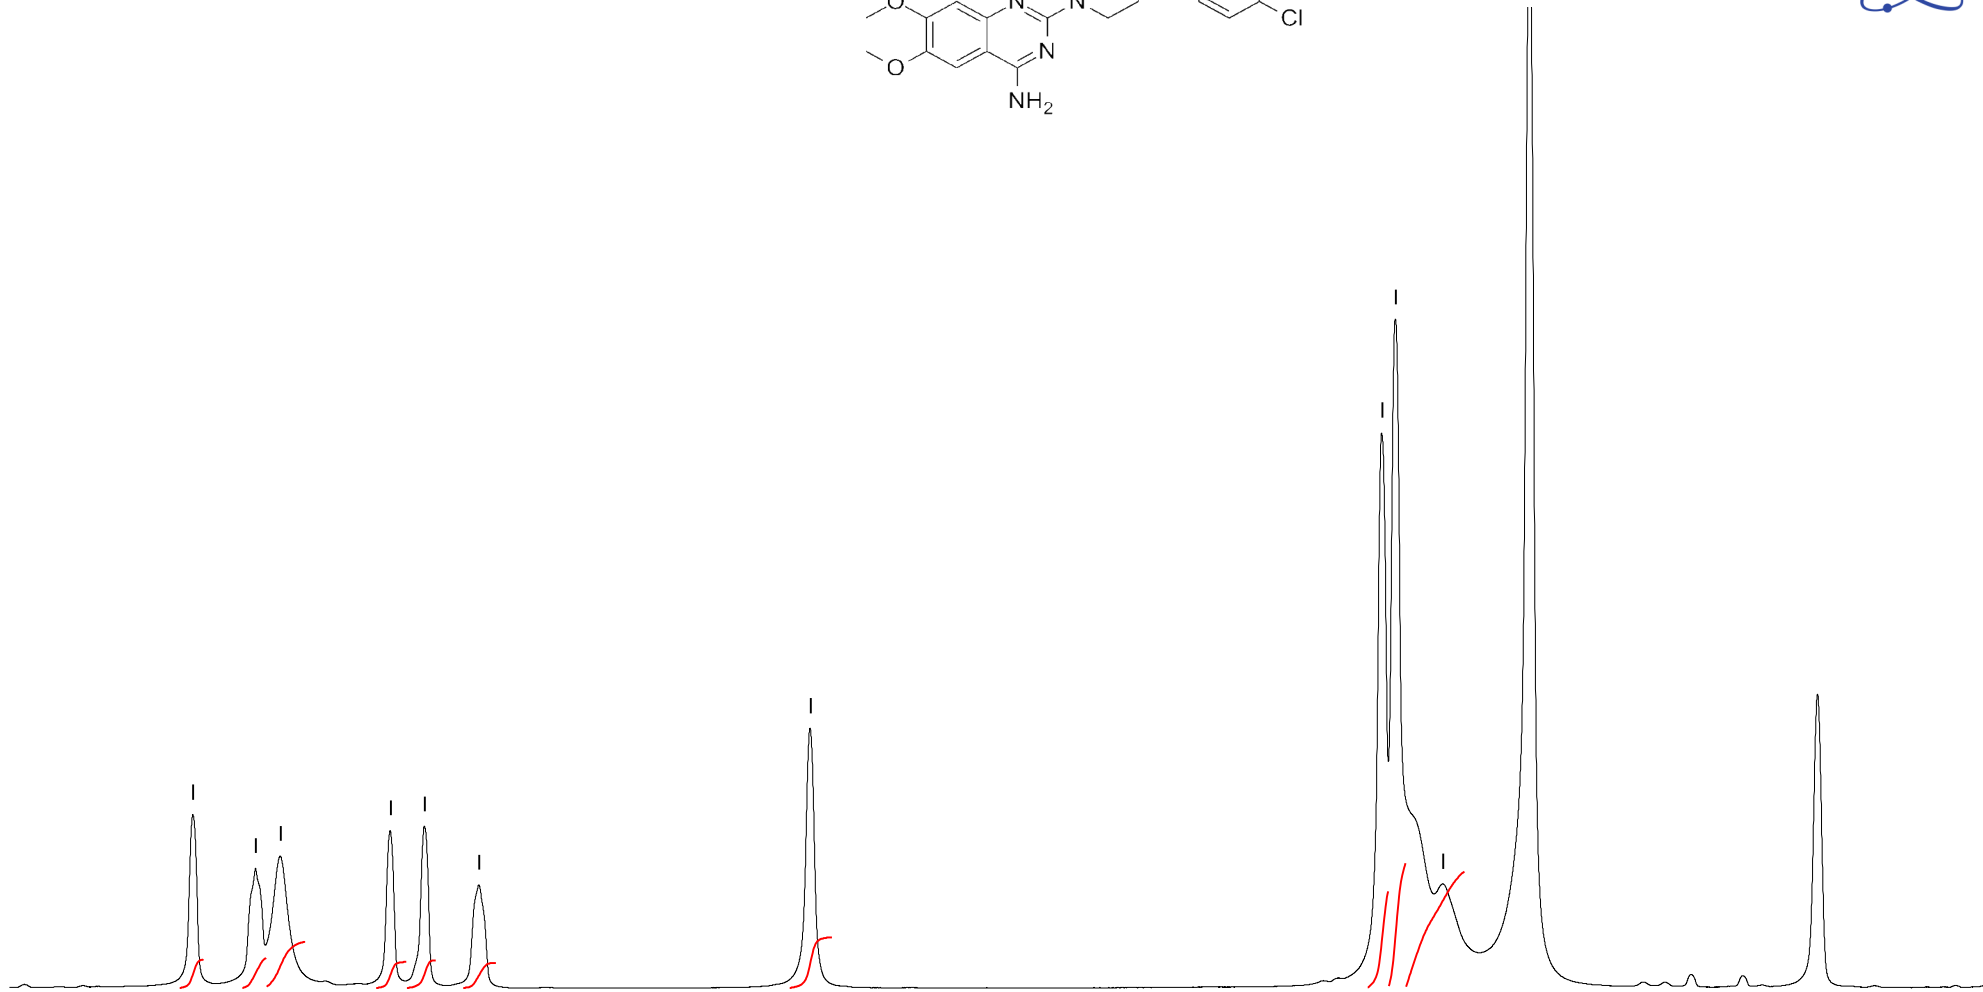

7.5

7.0

6.5

6.0

5.5

5.0

4.5

4.0

3.5

3.0

2.5

ppm

1.13

1.20

1.83

1.04

1.10

0.99

2.00

3.86

4.96

4.60



169.27  
161.62  
158.78  
154.69  
149.17  
145.52  
145.22  
135.92  
129.46  
118.40  
115.58  
114.29  
105.68  
104.14  
103.48  
56.30  
55.88  
47.59  
44.17  
42.17

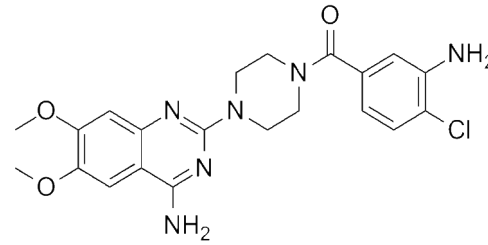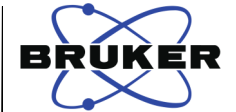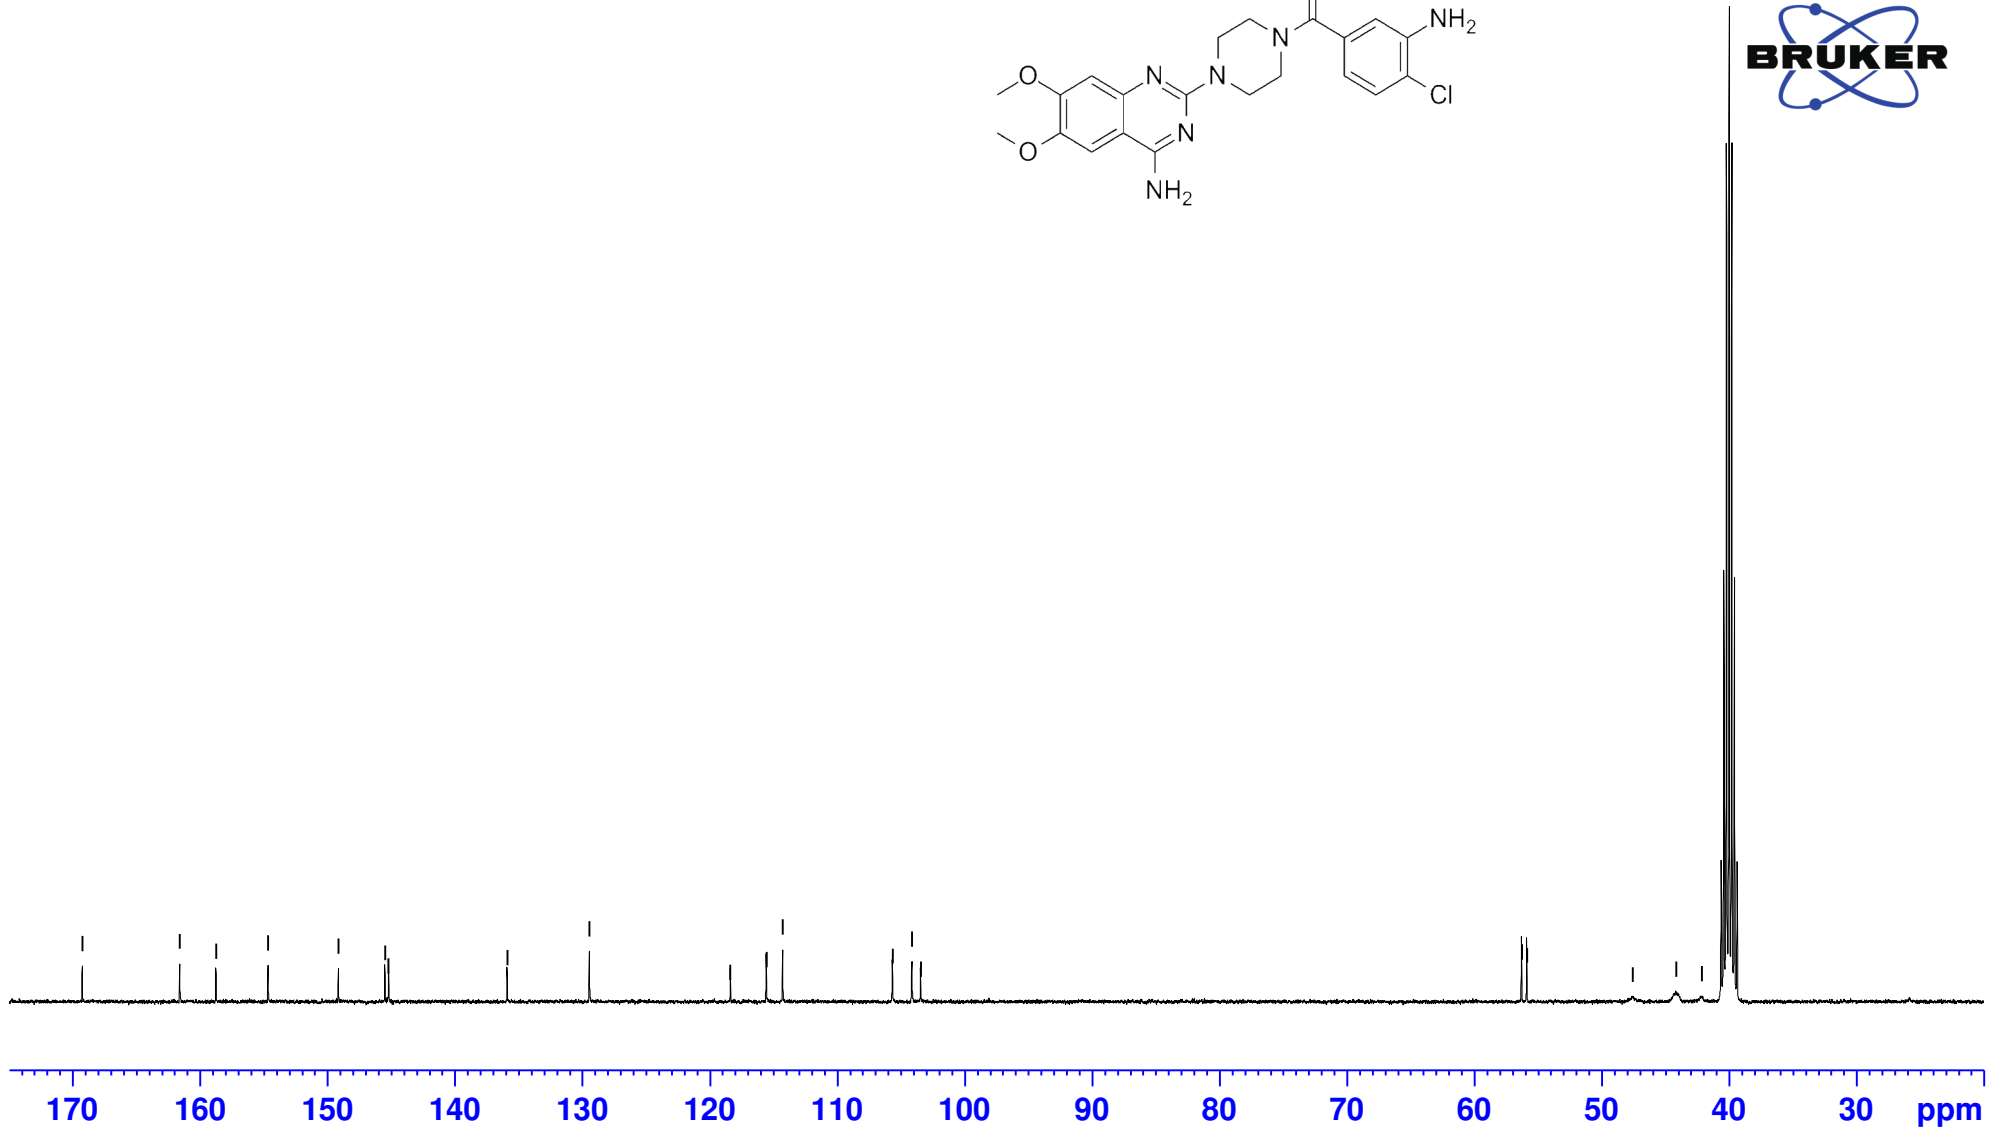

# ==== Shimadzu LabSolutions Data Report ====

Sample ID : 1                      Acquired                      12/20/2019 4:18:51 PM  
Data Filename : CF-F-17.lcd

## <Chromatogram>

Segment#1

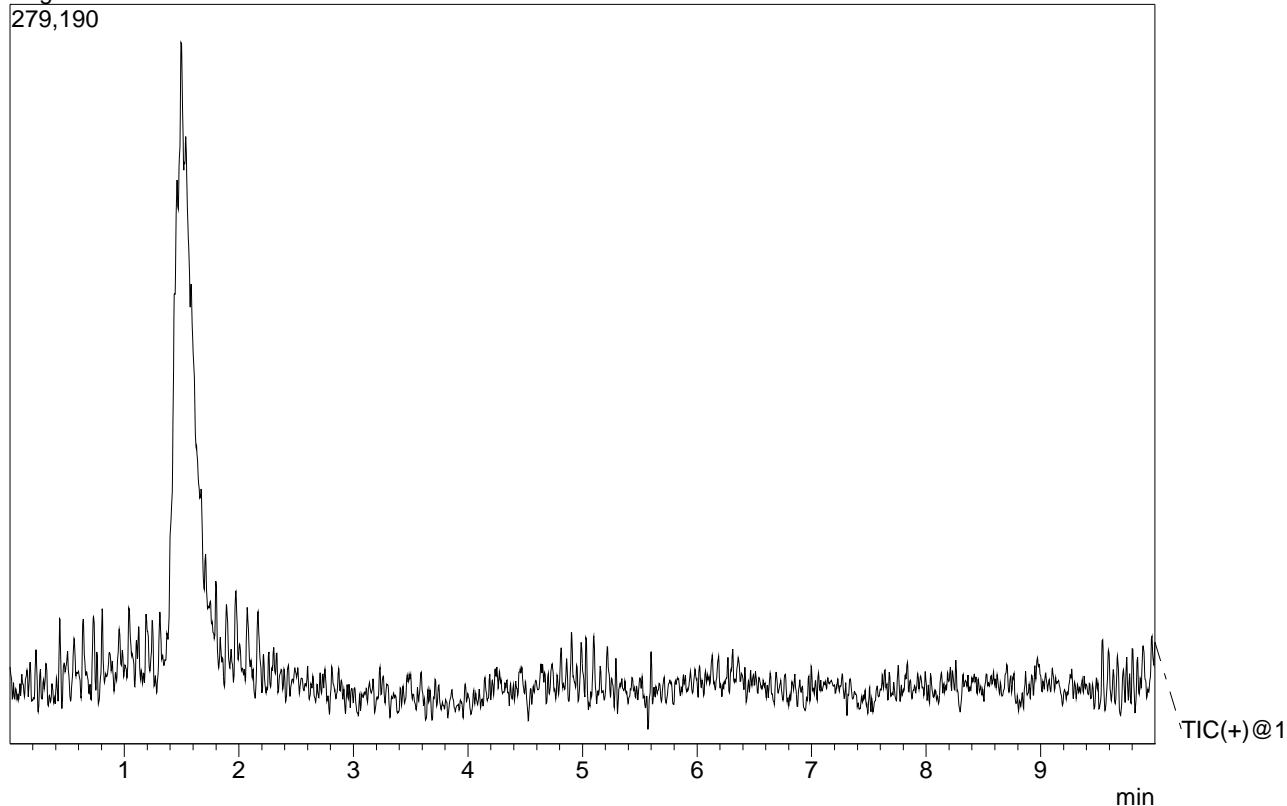

## <Spectrum>

R.Time:----(Scan#:----)  
MassPeaks:726 BasePeak:443.10(13336)  
Spectrum Mode:Averaged 1.365-1.761(391-504)  
BG Mode:None Polarity:Positive Segment 1 - Event 1

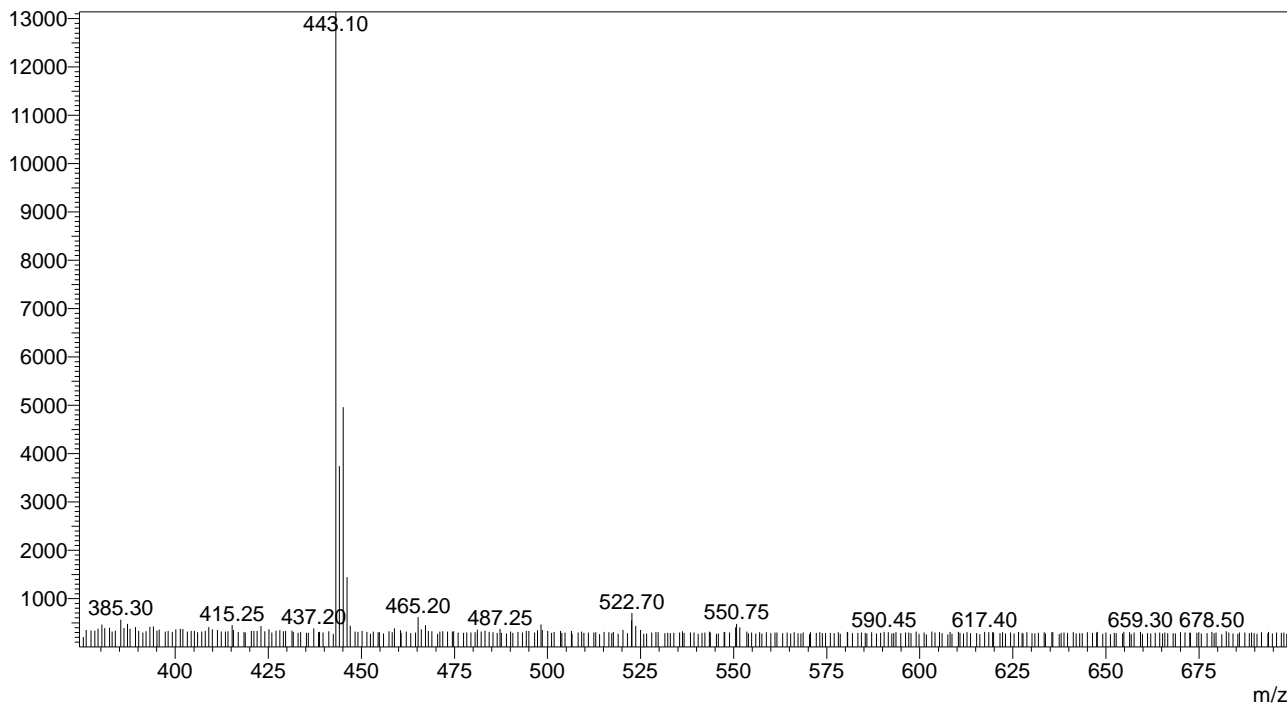

# Analysis Report

## <Sample Information>

Sample Name : CF\_17  
 Sample ID : CF\_017  
 Data Filename : CF\_Batch\_13\_6\_20\_6182020\_017.lcd  
 Method Filename : PDA\_6\_18\_20\_batch.lcm  
 Batch Filename : CF\_Batch\_13\_6\_20.lcb  
 Vial # : 1-17  
 Injection Volume : 5 uL  
 Date Acquired : 6/18/2020 1:14:08 PM  
 Date Processed : 6/18/2020 1:24:13 PM

Sample Type : Unknown  
 Acquired by : System Administrator  
 Processed by : System Administrator

## <Chromatogram>

mAU

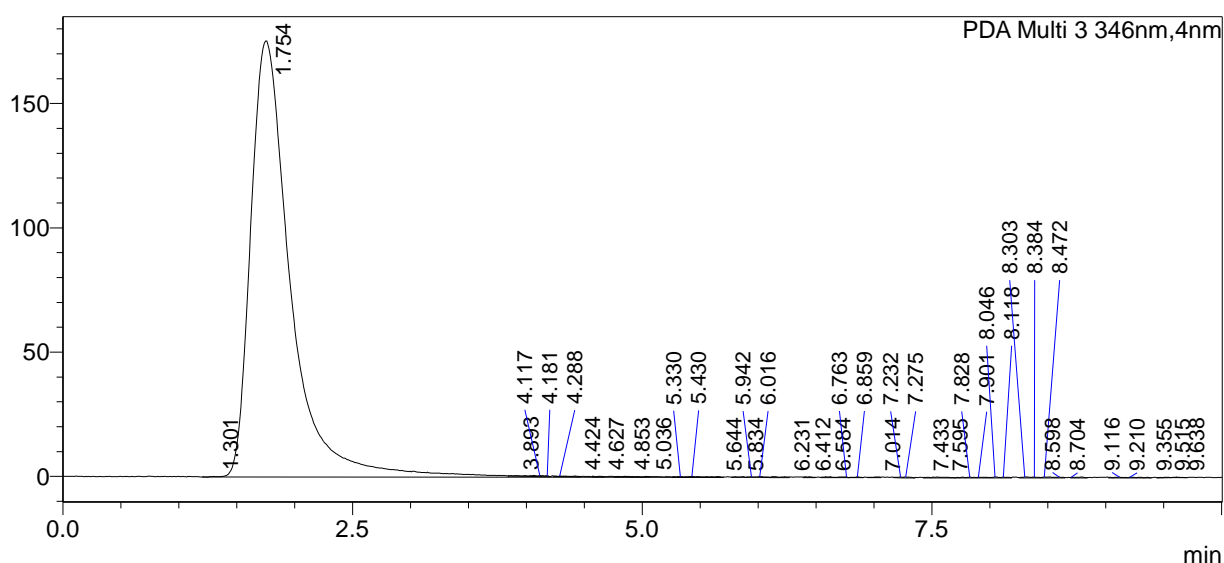

## <Peak Table>

PDA Ch3 346nm

| Peak# | Ret. Time | Area    | Height | Peak Purity Index    |
|-------|-----------|---------|--------|----------------------|
| 1     | 1.301     | 1370    | 272    | Cannot be calculated |
| 2     | 1.754     | 4198228 | 175388 | 0.997719             |
| 3     | 3.893     | 1529    | 177    | Cannot be calculated |
| 4     | 4.117     | 1981    | 369    | Cannot be calculated |
| 5     | 4.181     | 1155    | 361    | Cannot be calculated |
| 6     | 4.288     | 1882    | 354    | Cannot be calculated |
| 7     | 4.424     | 1425    | 380    | Cannot be calculated |
| 8     | 4.627     | 1091    | 235    | Cannot be calculated |
| 9     | 4.853     | 1647    | 261    | Cannot be calculated |
| 10    | 5.036     | 1295    | 315    | Cannot be calculated |
| 11    | 5.330     | 1138    | 295    | Cannot be calculated |
| 12    | 5.430     | 1898    | 360    | Cannot be calculated |
| 13    | 5.644     | 2133    | 310    | Cannot be calculated |
| 14    | 5.834     | 1500    | 247    | Cannot be calculated |
| 15    | 5.942     | 1173    | 312    | Cannot be calculated |
| 16    | 6.016     | 1632    | 380    | Cannot be calculated |
| 17    | 6.231     | 2194    | 310    | Cannot be calculated |
| 18    | 6.412     | 1250    | 281    | Cannot be calculated |
| 19    | 6.584     | 1240    | 281    | Cannot be calculated |
| 20    | 6.763     | 1325    | 312    | Cannot be calculated |
| 21    | 6.859     | 1052    | 318    | Cannot be calculated |
| 22    | 7.014     | 1429    | 277    | Cannot be calculated |

| Peak# | Ret. Time | Area    | Height | Peak Purity Index    |
|-------|-----------|---------|--------|----------------------|
| 23    | 7.232     | 1076    | 330    | Cannot be calculated |
| 24    | 7.275     | 1201    | 282    | Cannot be calculated |
| 25    | 7.433     | 1895    | 205    | Cannot be calculated |
| 26    | 7.595     | 1152    | 274    | Cannot be calculated |
| 27    | 7.828     | 1619    | 287    | Cannot be calculated |
| 28    | 7.901     | 1407    | 257    | Cannot be calculated |
| 29    | 8.046     | 1423    | 328    | Cannot be calculated |
| 30    | 8.118     | 1470    | 297    | Cannot be calculated |
| 31    | 8.303     | 1656    | 346    | Cannot be calculated |
| 32    | 8.384     | 1124    | 273    | Cannot be calculated |
| 33    | 8.472     | 1640    | 347    | Cannot be calculated |
| 34    | 8.598     | 1470    | 300    | Cannot be calculated |
| 35    | 8.704     | 1873    | 235    | Cannot be calculated |
| 36    | 9.116     | 1393    | 280    | Cannot be calculated |
| 37    | 9.210     | 1017    | 250    | Cannot be calculated |
| 38    | 9.355     | 1063    | 194    | Cannot be calculated |
| 39    | 9.515     | 1090    | 211    | Cannot be calculated |
| 40    | 9.638     | 1041    | 187    | Cannot be calculated |
| Total |           | 4254176 | 186678 |                      |

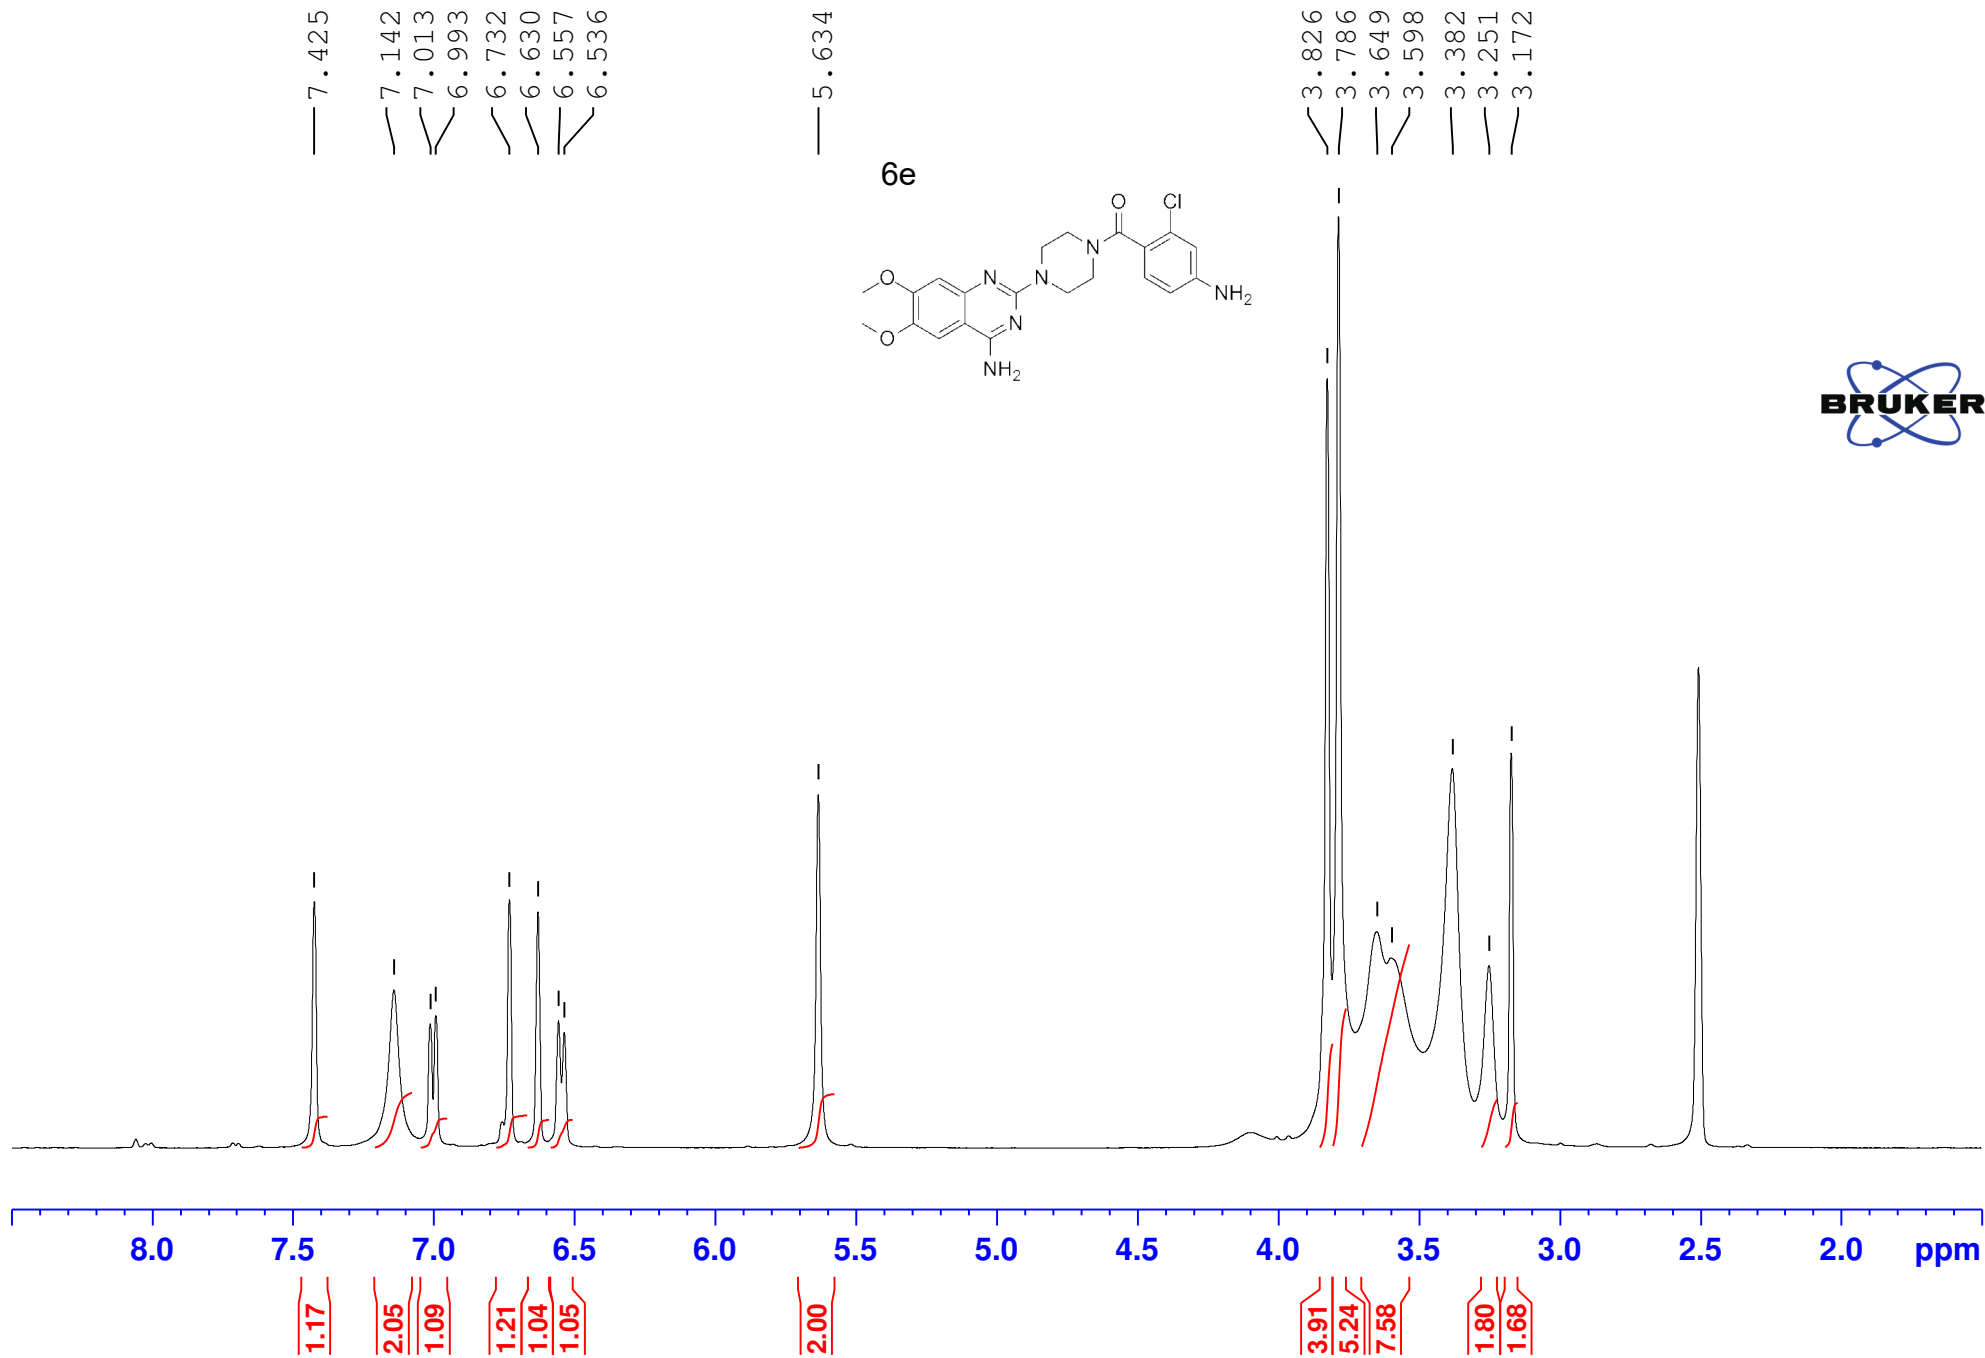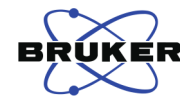

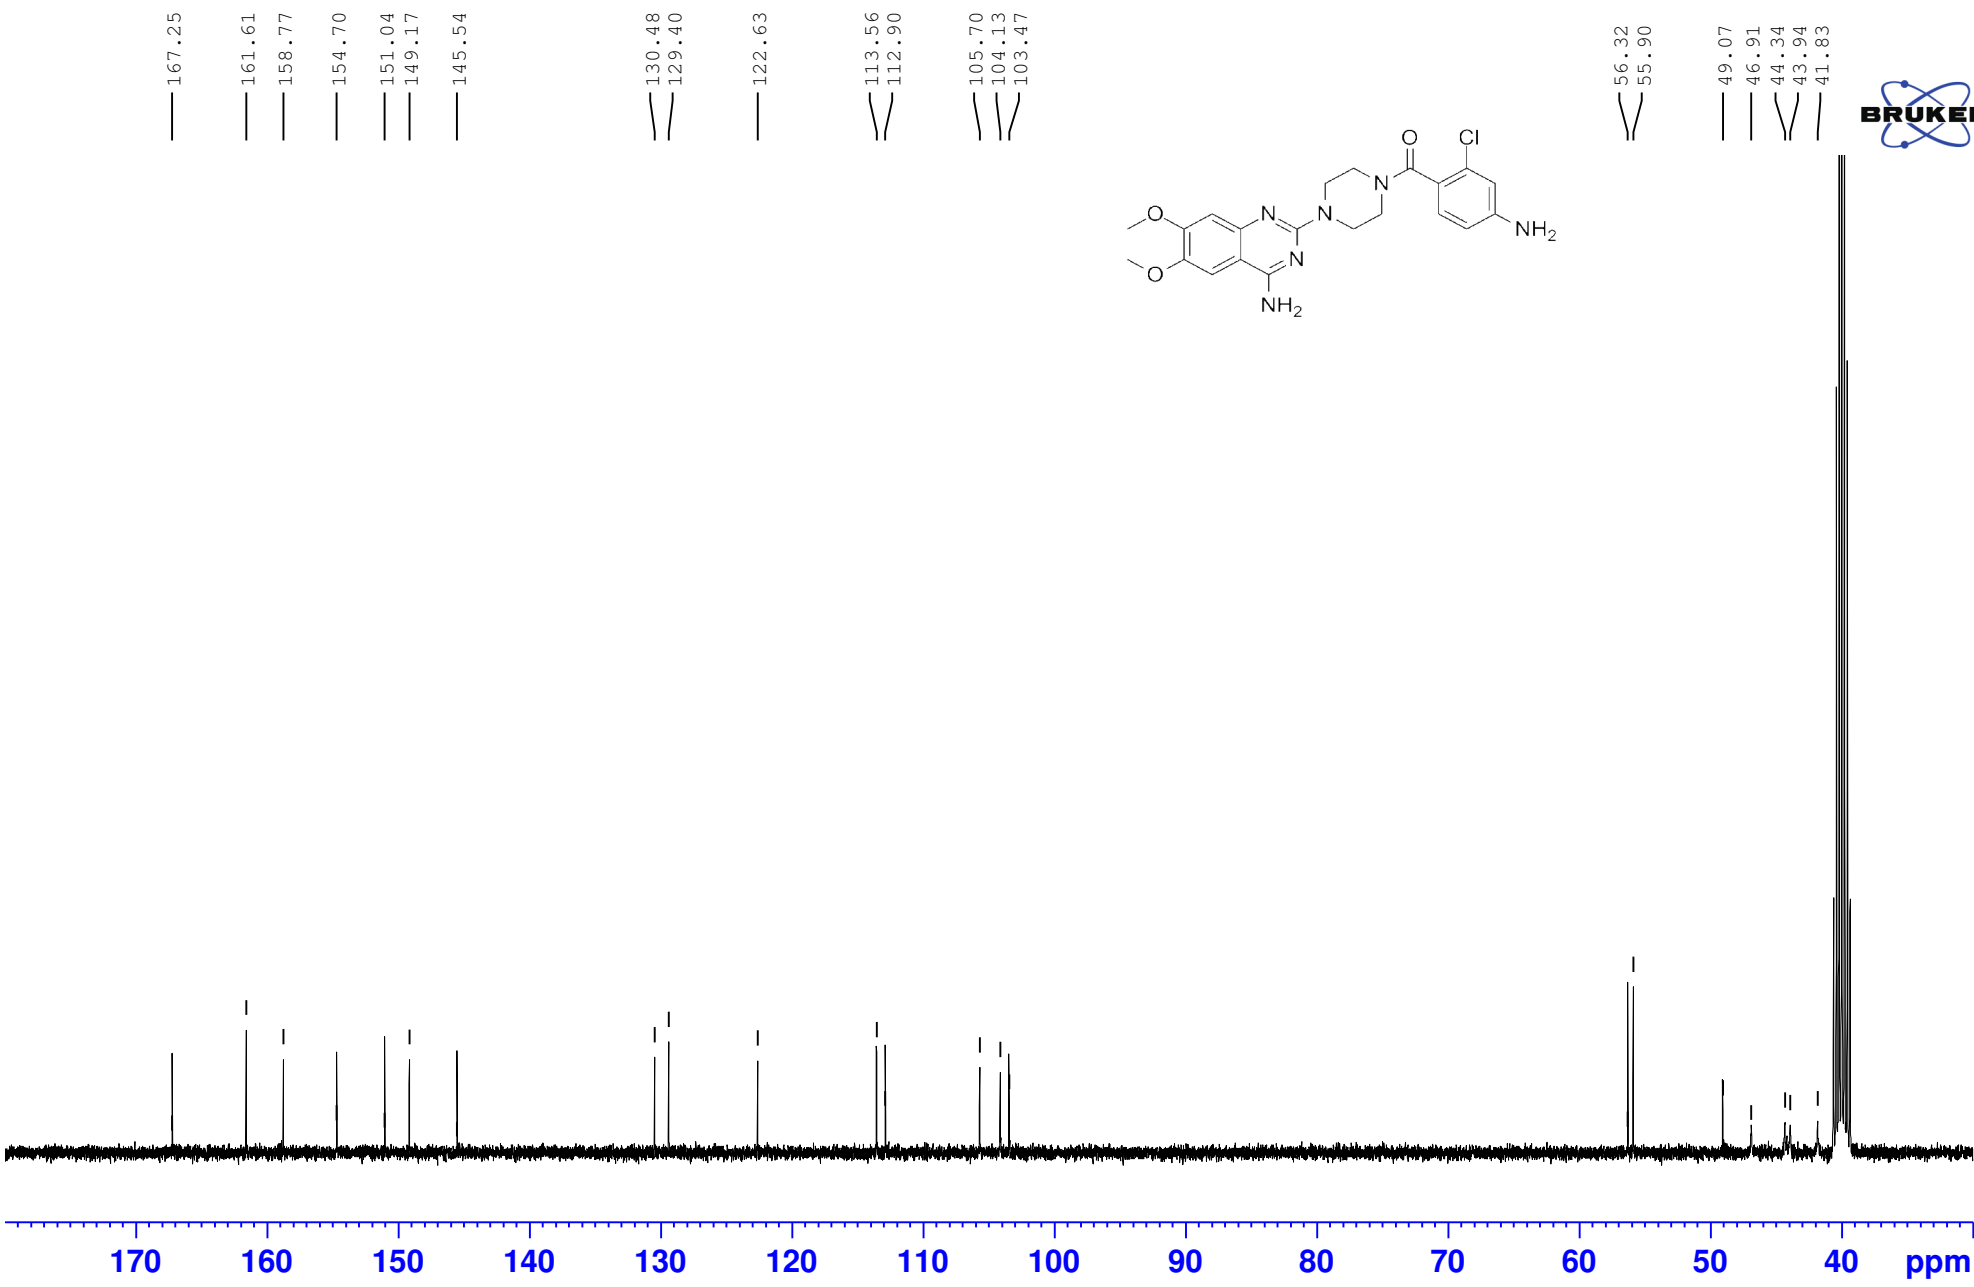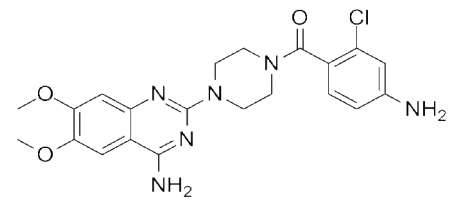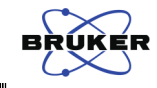

# ==== Shimadzu LabSolutions Data Report ====

Sample ID : 1                      Acquired                      1/9/2020 10:05:29 PM  
Data Filename : CF-F-26.lcd

## <Chromatogram>

Segment#1  
1,465,352

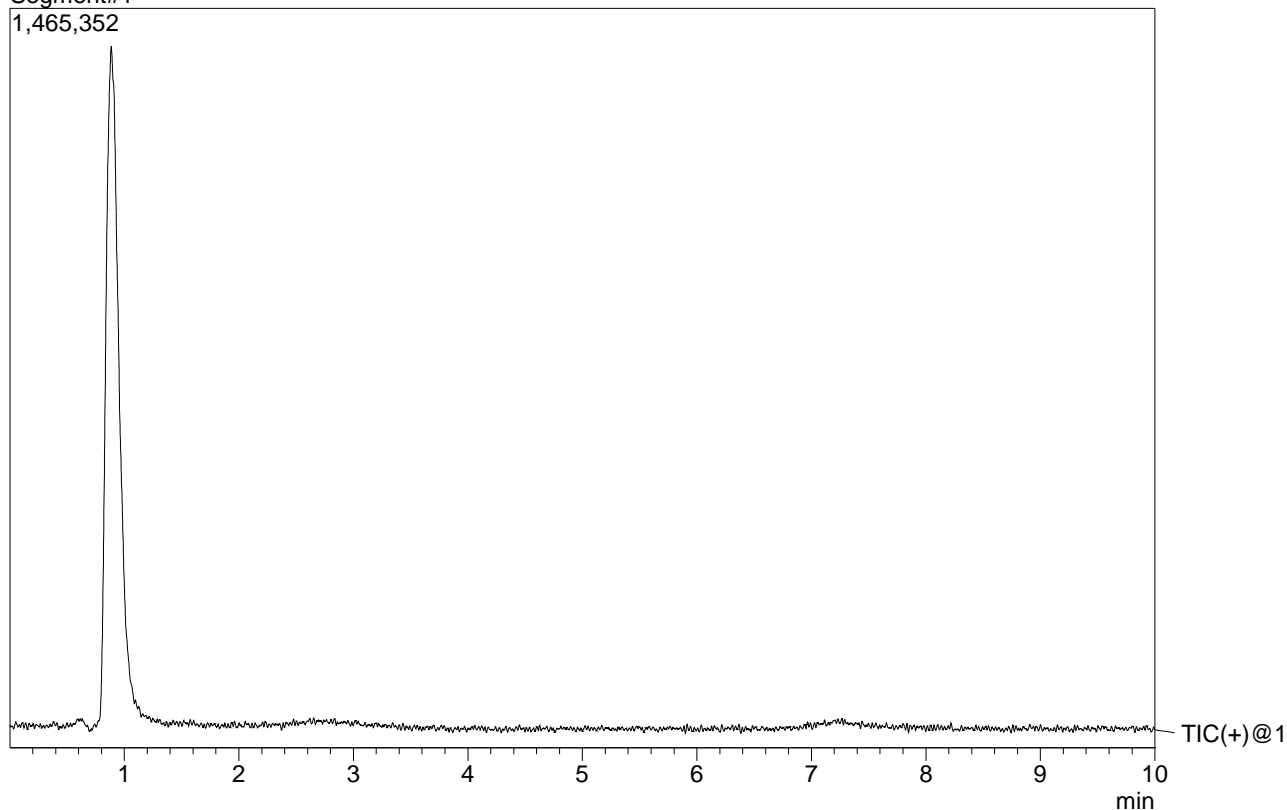

## <Spectrum>

R.Time:----(Scan#:----)  
MassPeaks:401    BasePeak:443.05(250009)  
Spectrum Mode:Averaged 0.737-1.133(443-681)  
BG Mode:None    Polarity:Positive    Segment 1 - Event 1

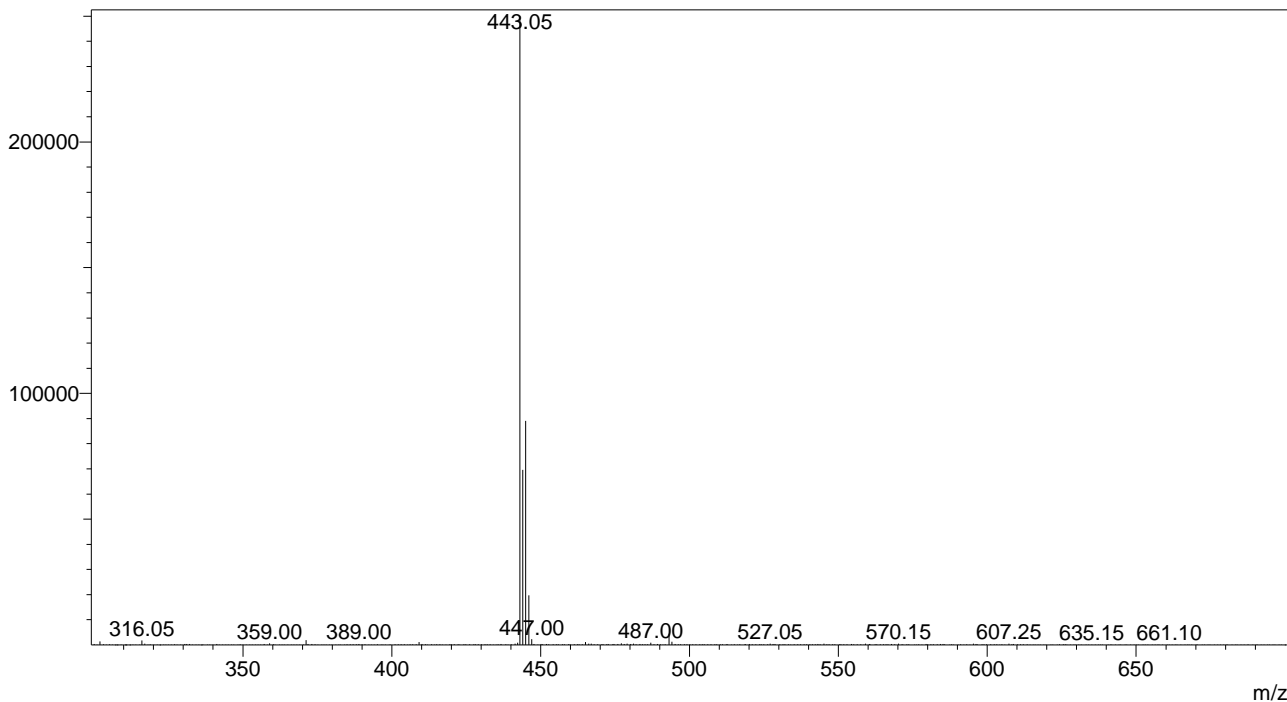



# Analysis Report

## <Sample Information>

Sample Name : CF\_26  
 Sample ID : CF\_026  
 Data Filename : CF\_Batch\_13\_6\_20\_6182020\_026.lcd  
 Method Filename : PDA\_6\_18\_20\_batch.lcm  
 Batch Filename : CF\_Batch\_13\_6\_20.lcb  
 Vial # : 1-25  
 Injection Volume : 5 uL  
 Date Acquired : 6/18/2020 2:59:07 PM  
 Date Processed : 6/18/2020 3:09:13 PM

Sample Type : Unknown  
 Acquired by : System Administrator  
 Processed by : System Administrator

## <Chromatogram>

mAU

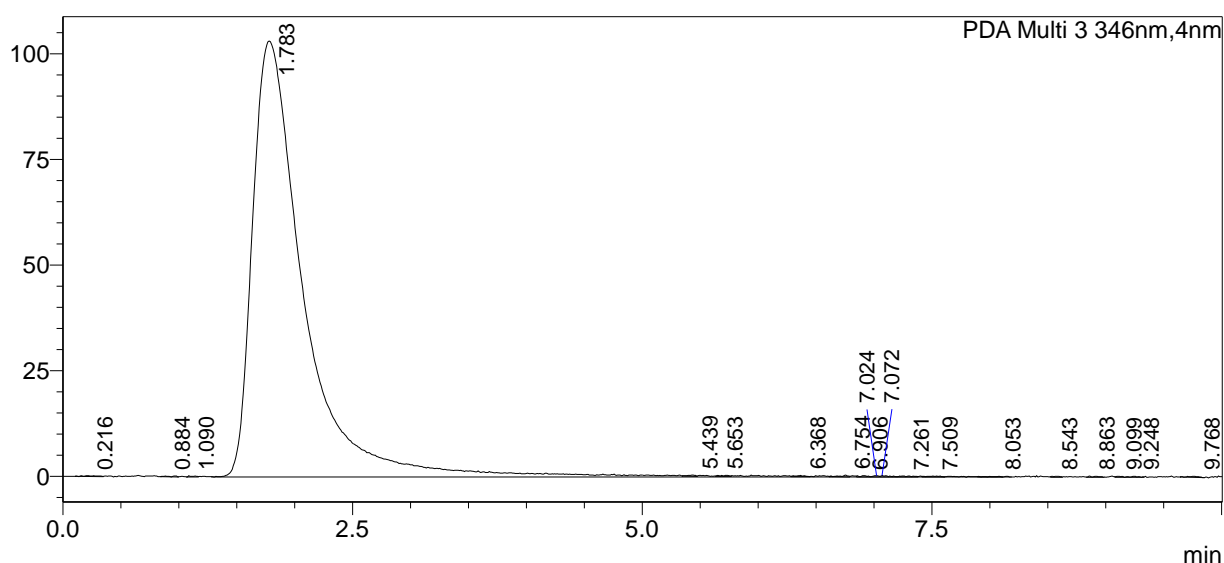

## <Peak Table>

PDA Ch3 346nm

| Peak# | Ret. Time | Area    | Height | Peak Purity Index    |
|-------|-----------|---------|--------|----------------------|
| 1     | 0.216     | 1762    | 227    | Cannot be calculated |
| 2     | 0.884     | 1003    | 171    | Cannot be calculated |
| 3     | 1.090     | 1056    | 277    | Cannot be calculated |
| 4     | 1.783     | 3149773 | 103166 | 0.995390             |
| 5     | 5.439     | 1161    | 255    | Cannot be calculated |
| 6     | 5.653     | 1440    | 257    | Cannot be calculated |
| 7     | 6.368     | 1737    | 279    | Cannot be calculated |
| 8     | 6.754     | 1892    | 390    | Cannot be calculated |
| 9     | 6.906     | 1030    | 250    | Cannot be calculated |
| 10    | 7.024     | 1174    | 284    | Cannot be calculated |
| 11    | 7.072     | 1582    | 318    | Cannot be calculated |
| 12    | 7.261     | 1635    | 240    | Cannot be calculated |
| 13    | 7.509     | 1598    | 195    | Cannot be calculated |
| 14    | 8.053     | 1306    | 110    | Cannot be calculated |
| 15    | 8.543     | 1188    | 231    | Cannot be calculated |
| 16    | 8.863     | 1618    | 298    | Cannot be calculated |
| 17    | 9.099     | 1141    | 281    | Cannot be calculated |
| 18    | 9.248     | 1572    | 288    | Cannot be calculated |
| 19    | 9.768     | 1633    | 283    | Cannot be calculated |
| Total |           | 3175301 | 107801 |                      |



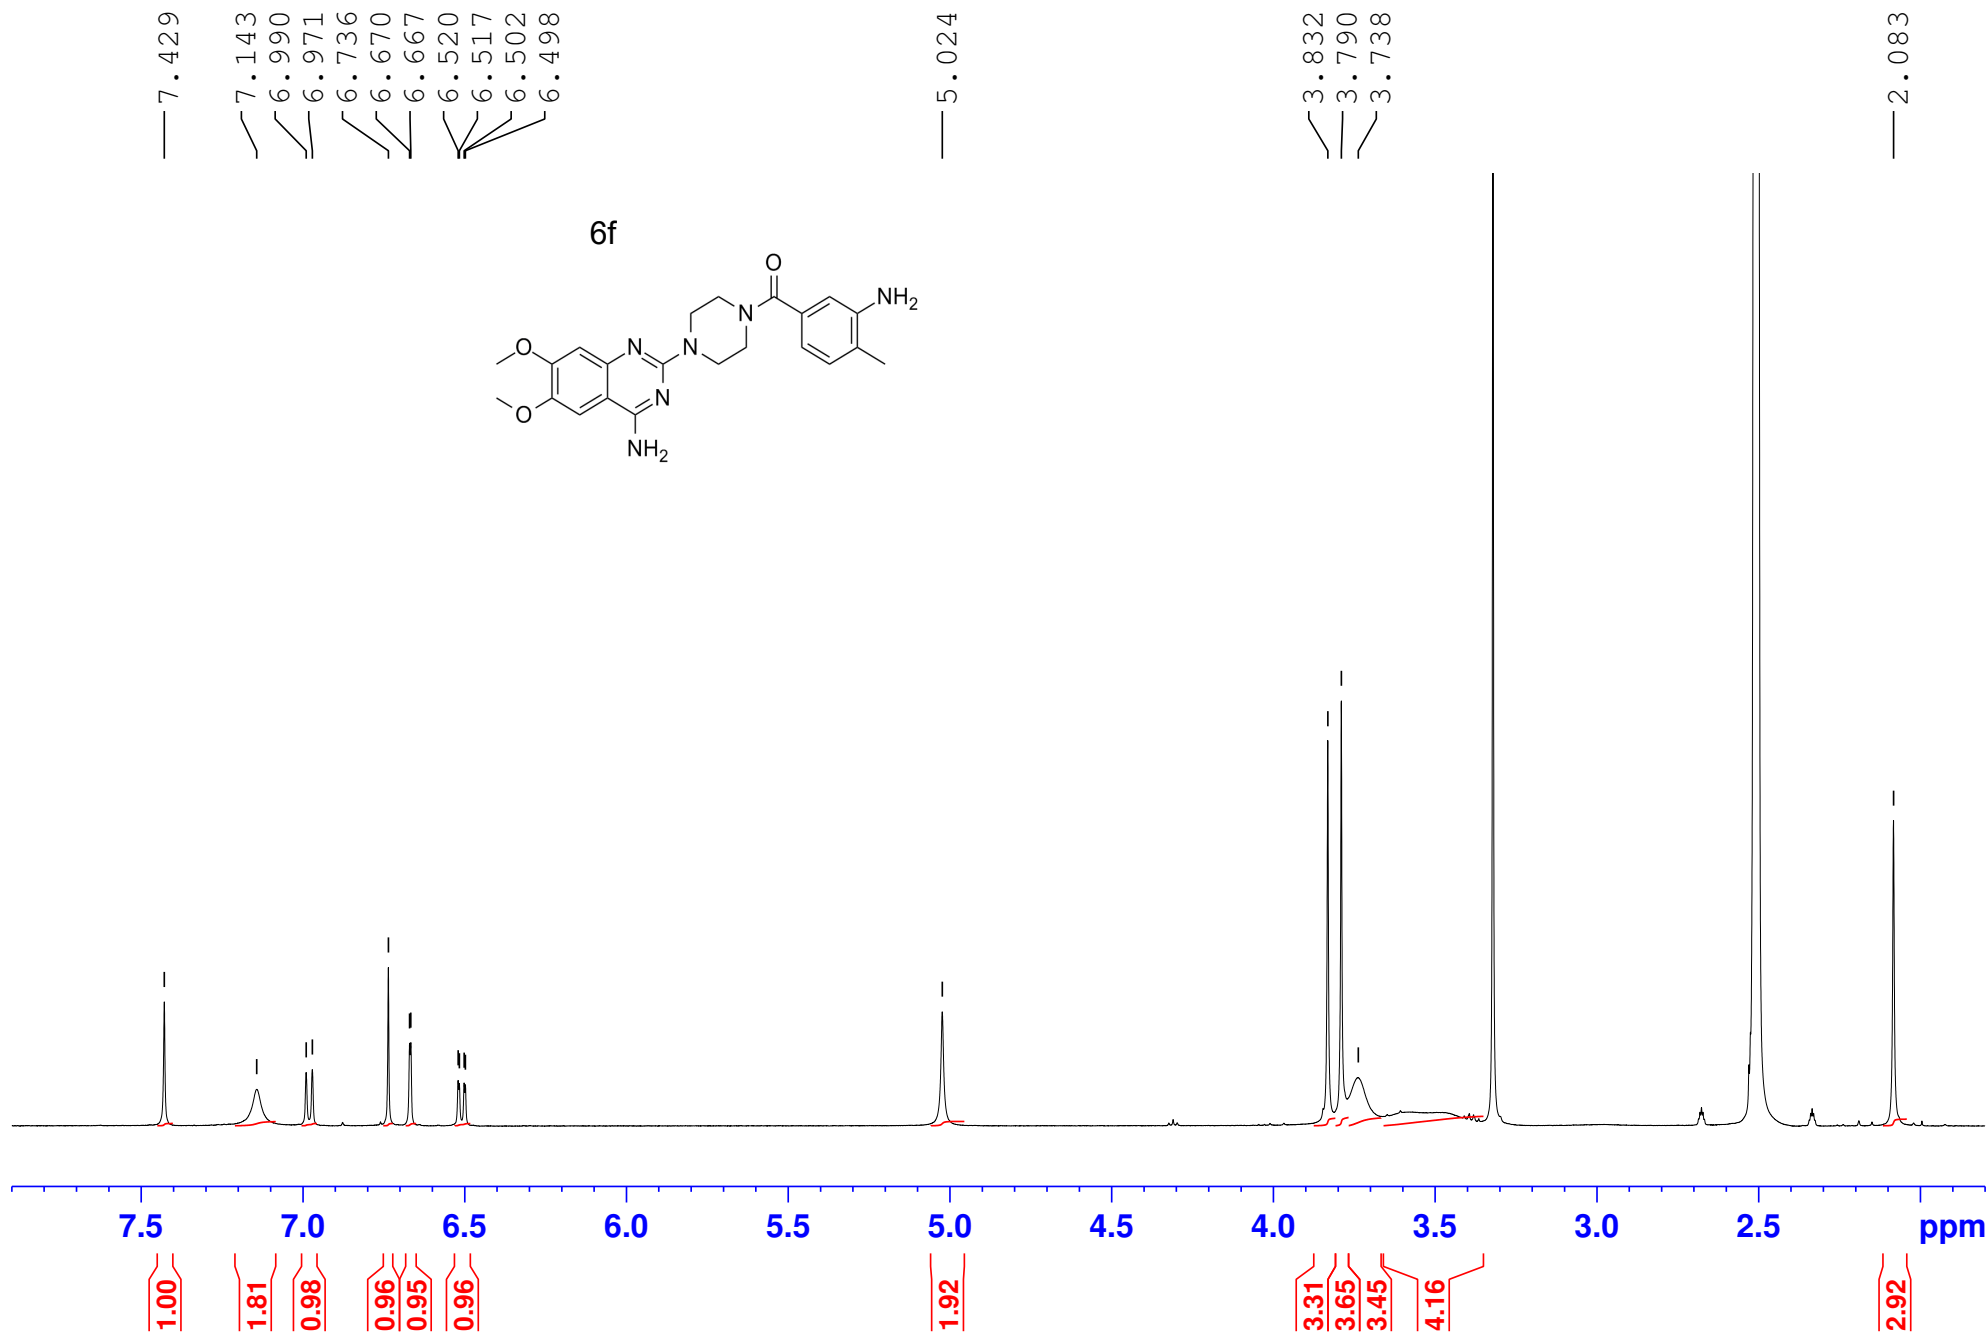

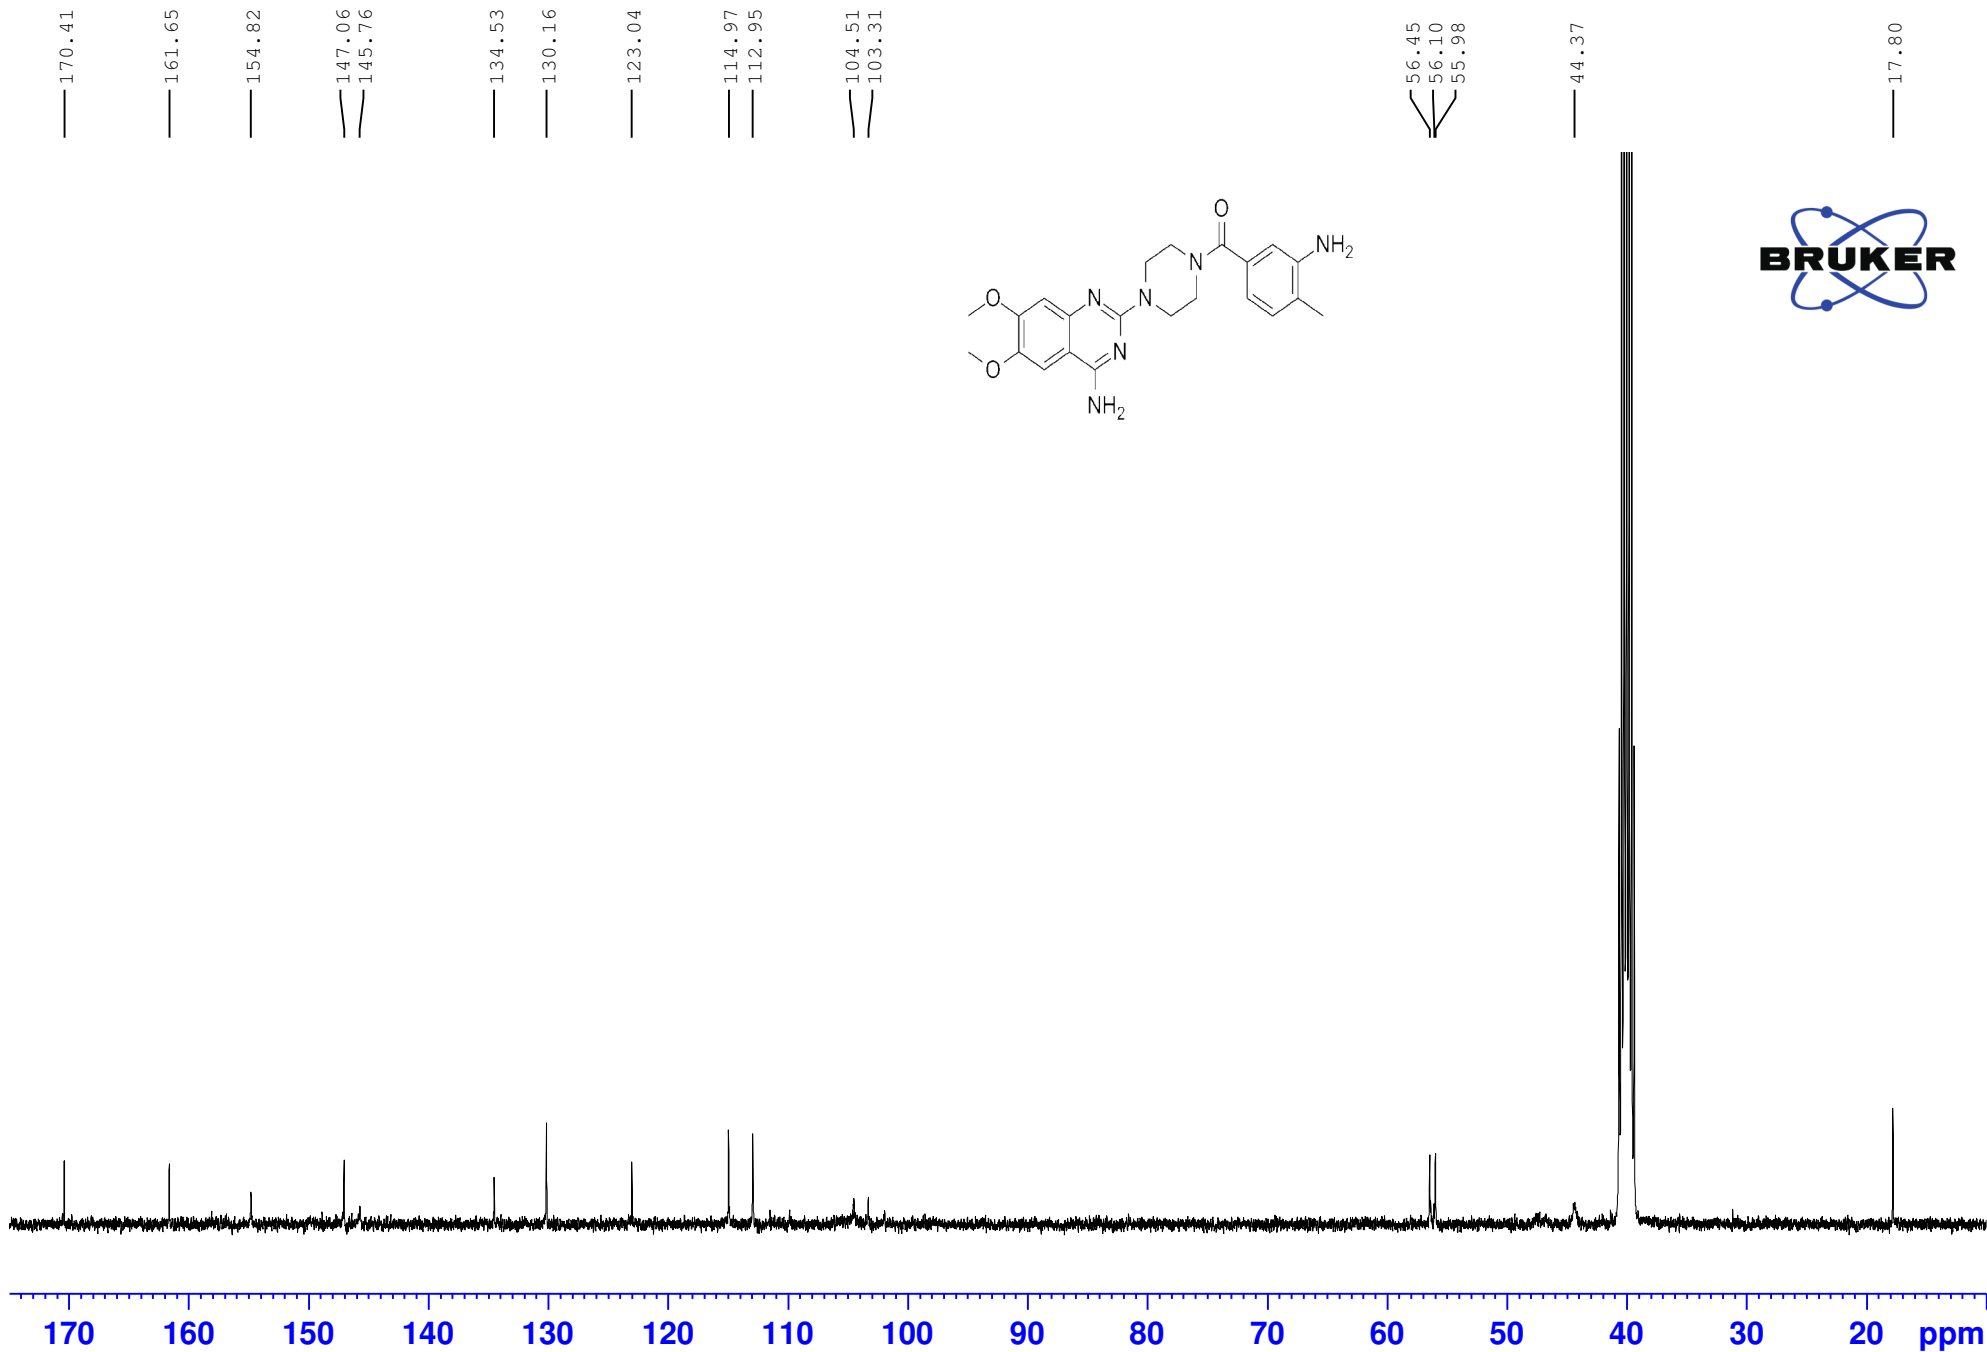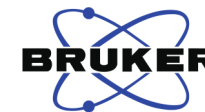

# ==== Shimadzu LabSolutions Data Report ====

Sample ID : 1                      Acquired                      1/9/2020 11:04:45 PM  
Data Filename : CF-F-15.lcd

## <Chromatogram>

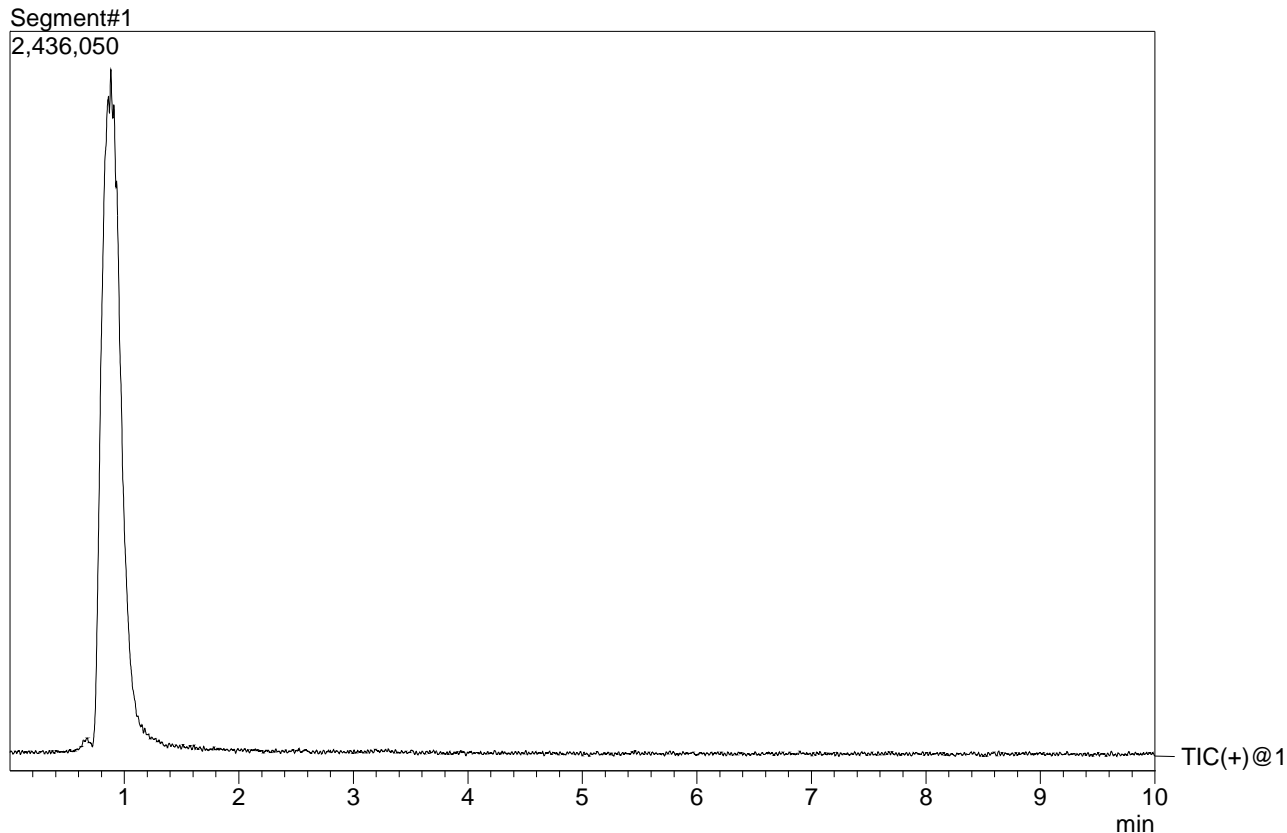

## <Spectrum>

R.Time:----(Scan#:----)  
MassPeaks:401    BasePeak:423.10(691446)  
Spectrum Mode:Averaged 0.710-1.178(427-708)  
BG Mode:None    Polarity:Positive    Segment 1 - Event 1

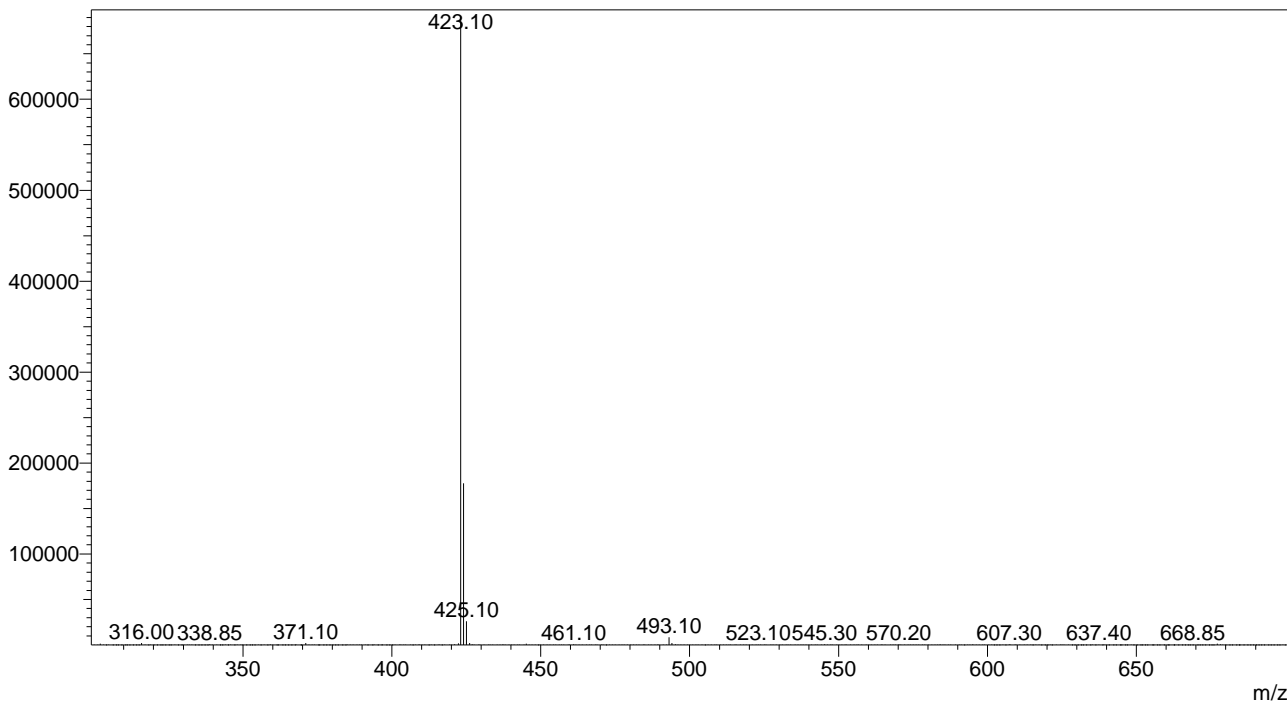

# Analysis Report

## <Sample Information>

Sample Name : CF\_15  
 Sample ID : CF\_015  
 Data Filename : CF\_Batch\_13\_6\_20\_6182020\_015.lcd  
 Method Filename : PDA\_6\_18\_20\_batch.lcm  
 Batch Filename : CF\_Batch\_13\_6\_20.lcb  
 Vial # : 1-15  
 Injection Volume : 5 uL  
 Date Acquired : 6/18/2020 12:53:08 PM  
 Date Processed : 6/18/2020 1:03:14 PM

Sample Type : Unknown  
 Acquired by : System Administrator  
 Processed by : System Administrator

## <Chromatogram>

mAU

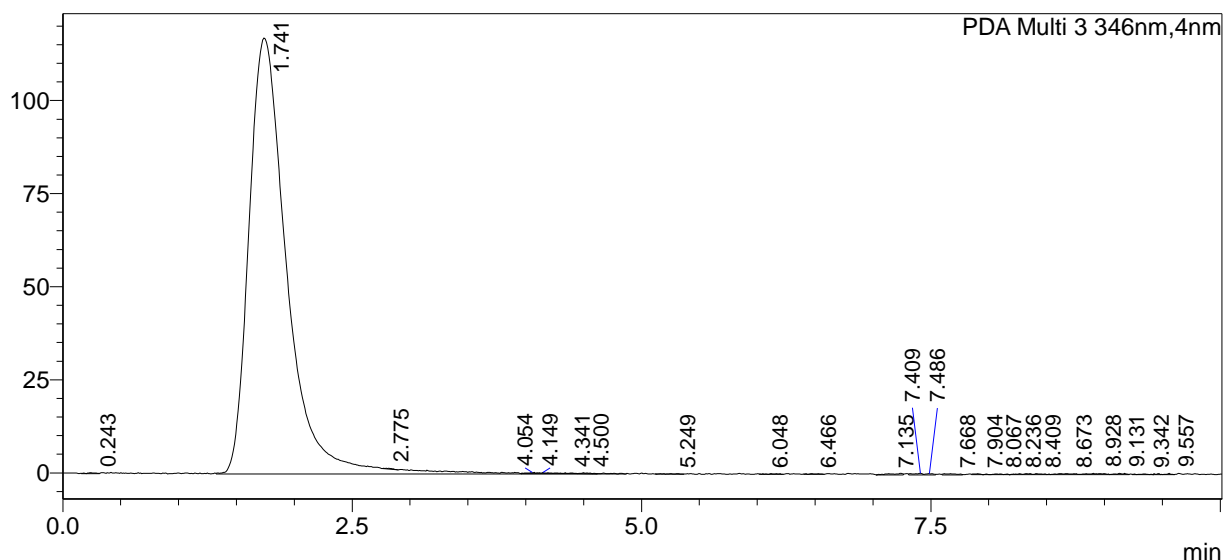

## <Peak Table>

PDA Ch3 346nm

| Peak# | Ret. Time | Area    | Height | Peak Purity Index    |
|-------|-----------|---------|--------|----------------------|
| 1     | 0.243     | 1115    | 241    | Cannot be calculated |
| 2     | 1.741     | 2658847 | 117048 | 0.977933             |
| 3     | 2.775     | 1022    | 187    | Cannot be calculated |
| 4     | 4.054     | 1642    | 309    | Cannot be calculated |
| 5     | 4.149     | 1871    | 358    | Cannot be calculated |
| 6     | 4.341     | 1915    | 279    | Cannot be calculated |
| 7     | 4.500     | 1700    | 290    | Cannot be calculated |
| 8     | 5.249     | 1055    | 169    | Cannot be calculated |
| 9     | 6.048     | 1475    | 187    | Cannot be calculated |
| 10    | 6.466     | 1224    | 224    | Cannot be calculated |
| 11    | 7.135     | 2954    | 278    | Cannot be calculated |
| 12    | 7.409     | 2140    | 373    | Cannot be calculated |
| 13    | 7.486     | 1427    | 315    | Cannot be calculated |
| 14    | 7.668     | 2101    | 270    | Cannot be calculated |
| 15    | 7.904     | 1093    | 280    | Cannot be calculated |
| 16    | 8.067     | 1578    | 239    | Cannot be calculated |
| 17    | 8.236     | 1347    | 193    | Cannot be calculated |
| 18    | 8.409     | 2708    | 324    | Cannot be calculated |
| 19    | 8.673     | 3082    | 294    | Cannot be calculated |
| 20    | 8.928     | 3459    | 238    | Cannot be calculated |
| 21    | 9.131     | 1799    | 344    | Cannot be calculated |
| 22    | 9.342     | 1038    | 192    | Cannot be calculated |

| Peak# | Ret. Time | Area    | Height | Peak Purity Index    |
|-------|-----------|---------|--------|----------------------|
| 23    | 9.557     | 1400    | 339    | cannot be calculated |
| Total |           | 2697991 | 122971 |                      |

— 10.150

7.712  
7.693  
7.436  
7.425  
7.403  
7.155  
— 6.740

3.830  
3.788  
3.557

— 2.437

7ab

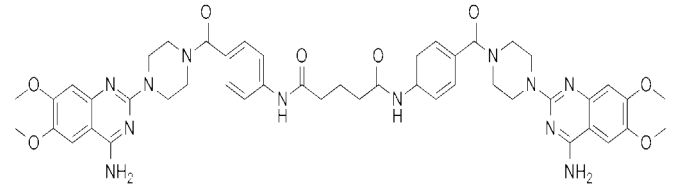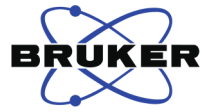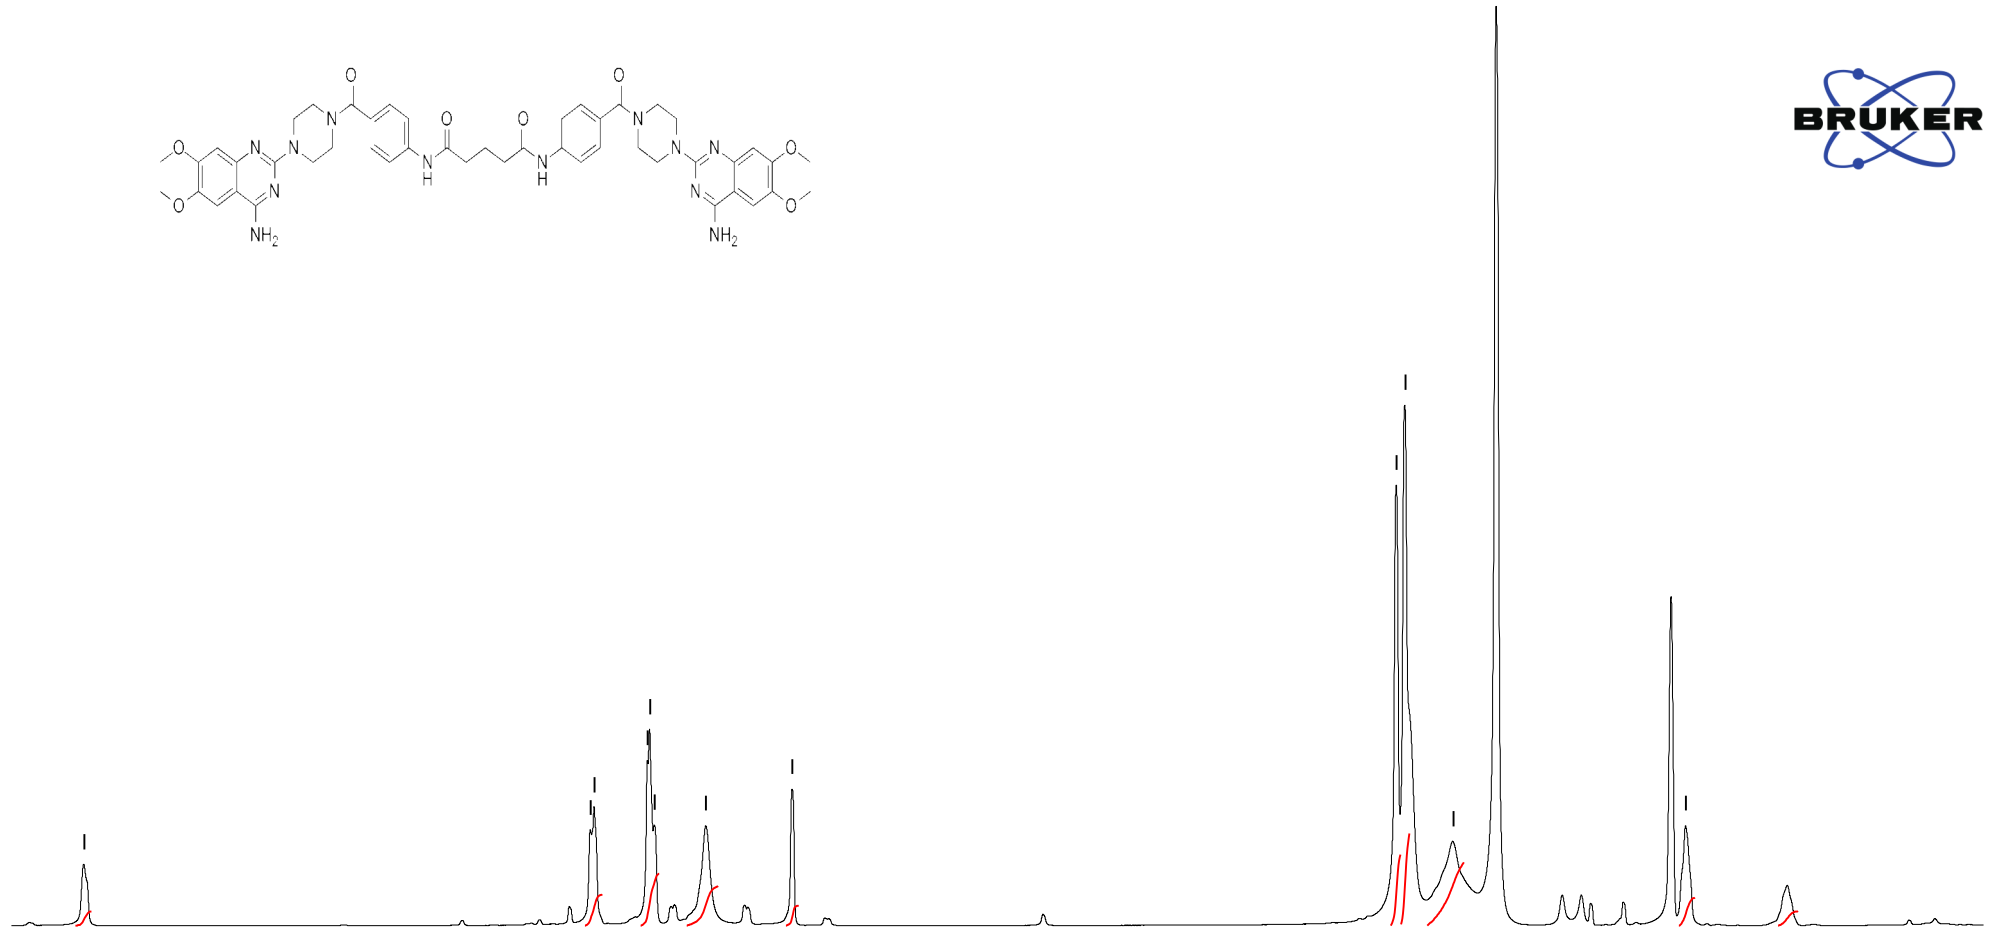

2.00

4.38

7.29

5.53

2.77

10.03

13.36

8.94

3.92

2.03

ppm

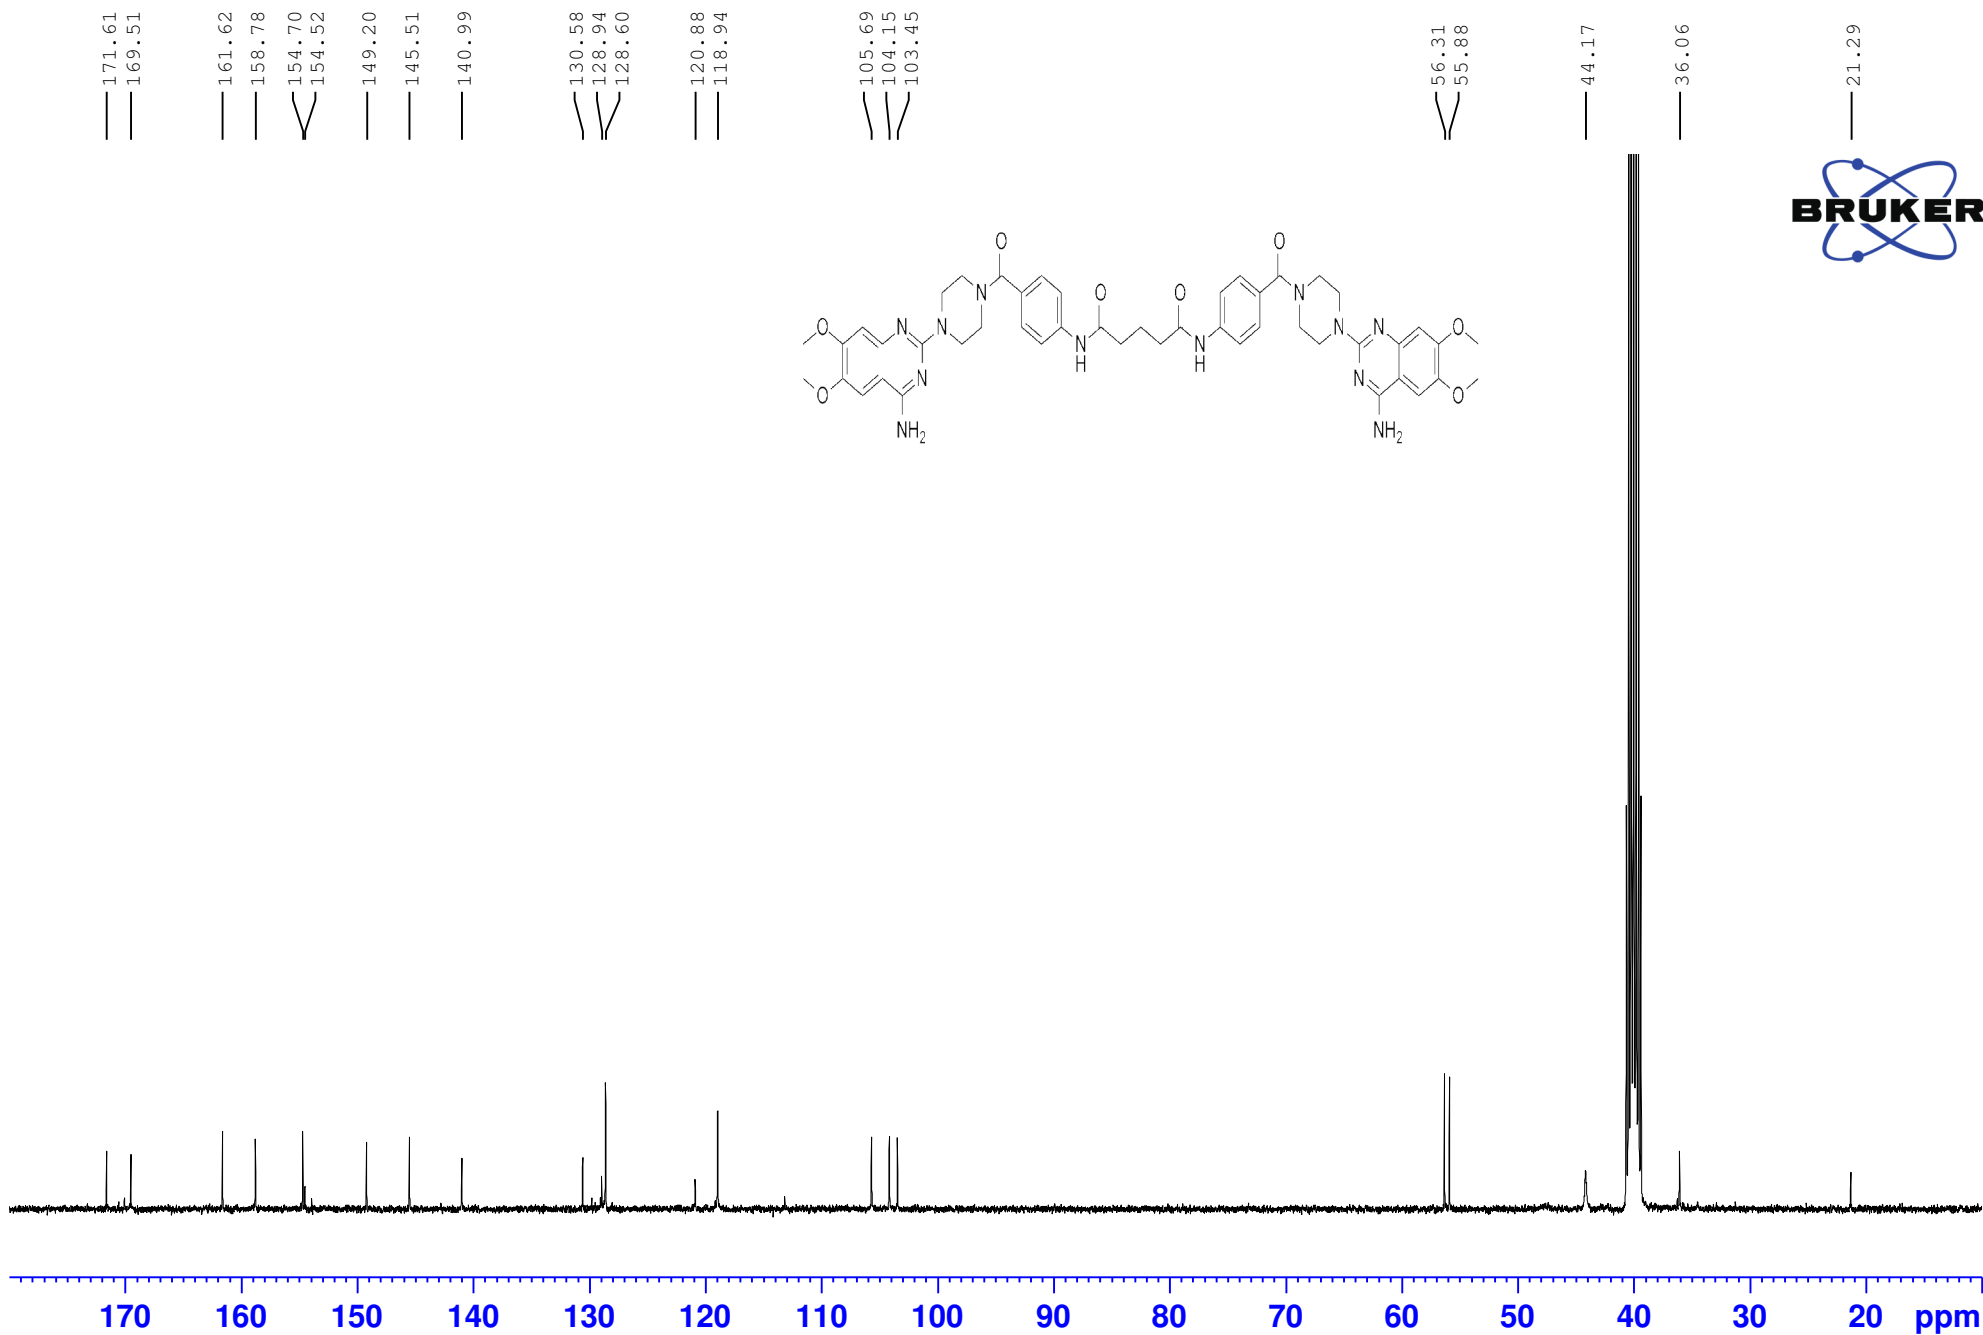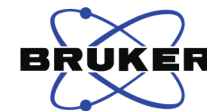

## ==== Shimadzu LabSolutions Data Report ====

Sample ID : 1 Acquired 1/4/2020 8:27:05 PM  
Data Filename : CF-F-23.lcd

<Chromatogram>

Segment#1

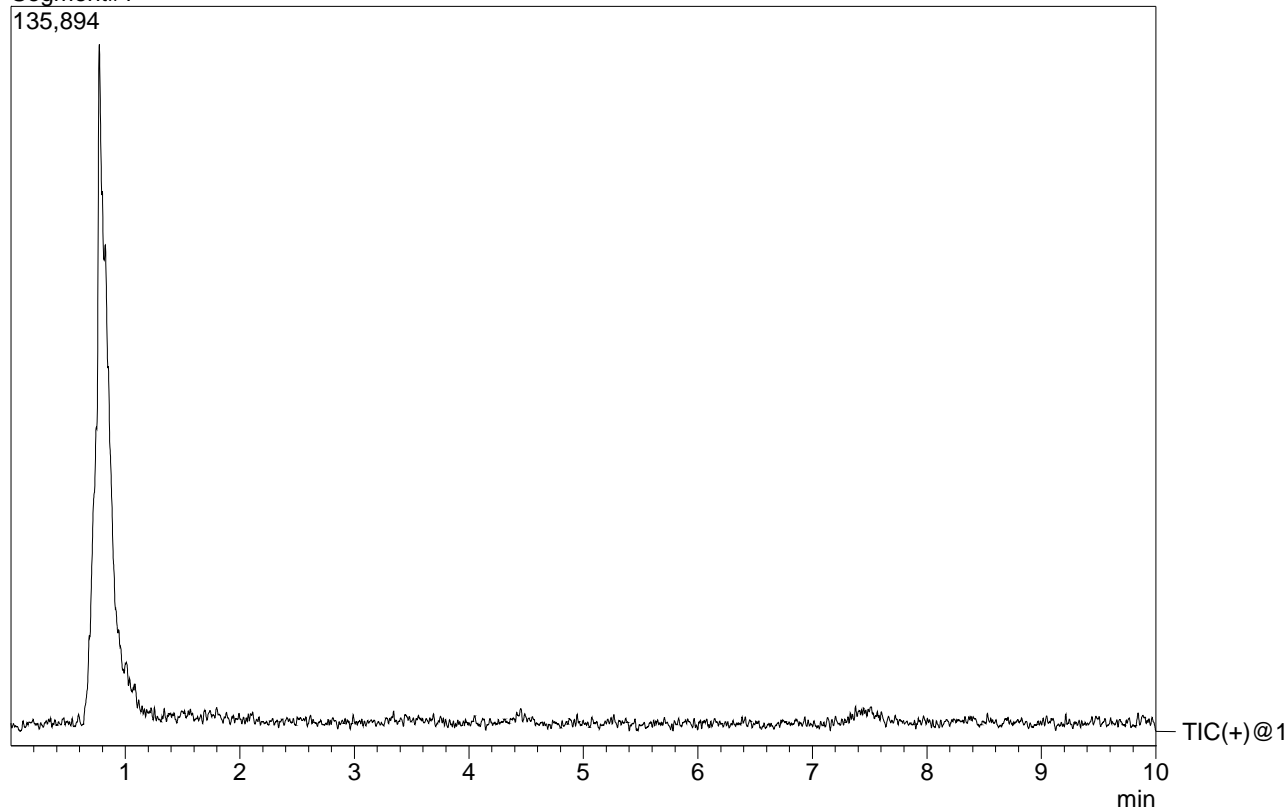

<Spectrum>

R.Time:----(Scan#:----)  
MassPeaks:501 BasePeak:913.20(17597)  
Spectrum Mode:Averaged 0.620-1.115(373-670)  
BG Mode:None Polarity:Positive Segment 1 - Event 1

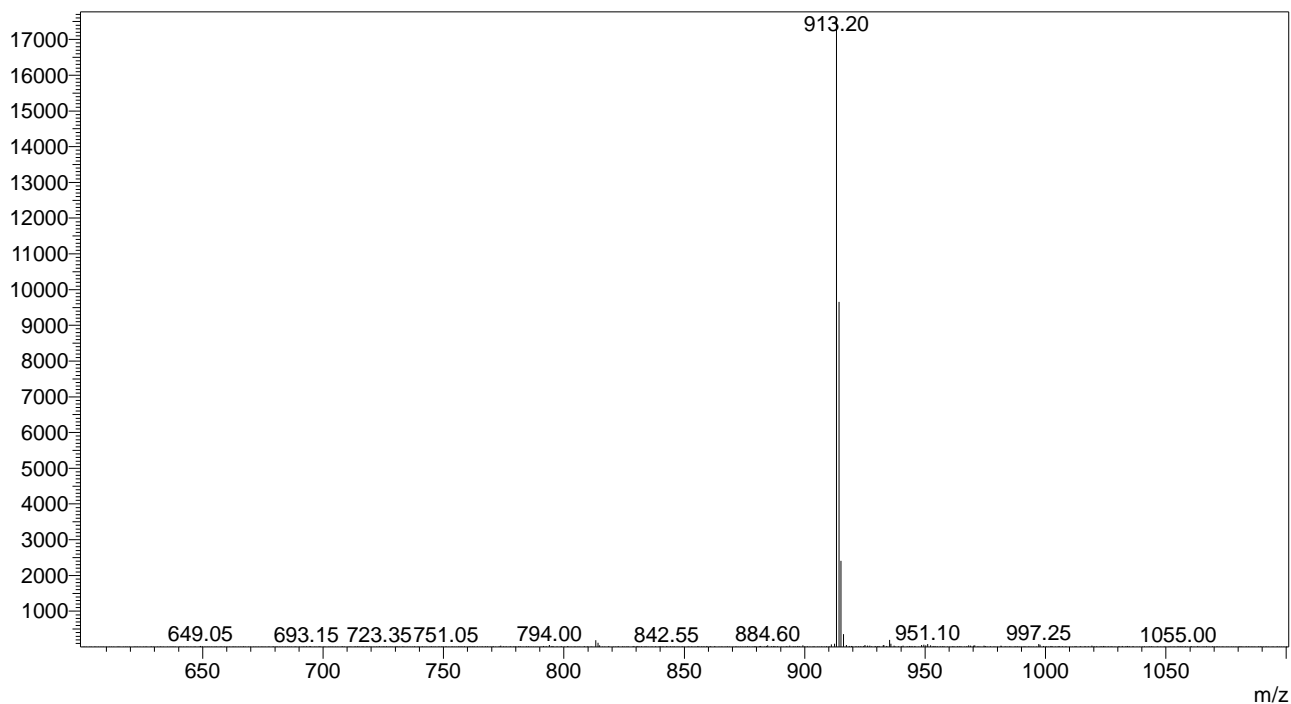



# Analysis Report

## <Sample Information>

Sample Name : CF\_23  
 Sample ID : CF\_023  
 Data Filename : CF\_Batch\_13\_6\_20\_6182020\_023.lcd  
 Method Filename : PDA\_6\_18\_20\_batch.lcm  
 Batch Filename : CF\_Batch\_13\_6\_20.lcb  
 Vial # : 1-23  
 Injection Volume : 5 uL  
 Date Acquired : 6/18/2020 2:27:35 PM  
 Date Processed : 6/18/2020 2:38:55 PM

Sample Type : Unknown  
 Acquired by : System Administrator  
 Processed by : System Administrator

## <Chromatogram>

mAU

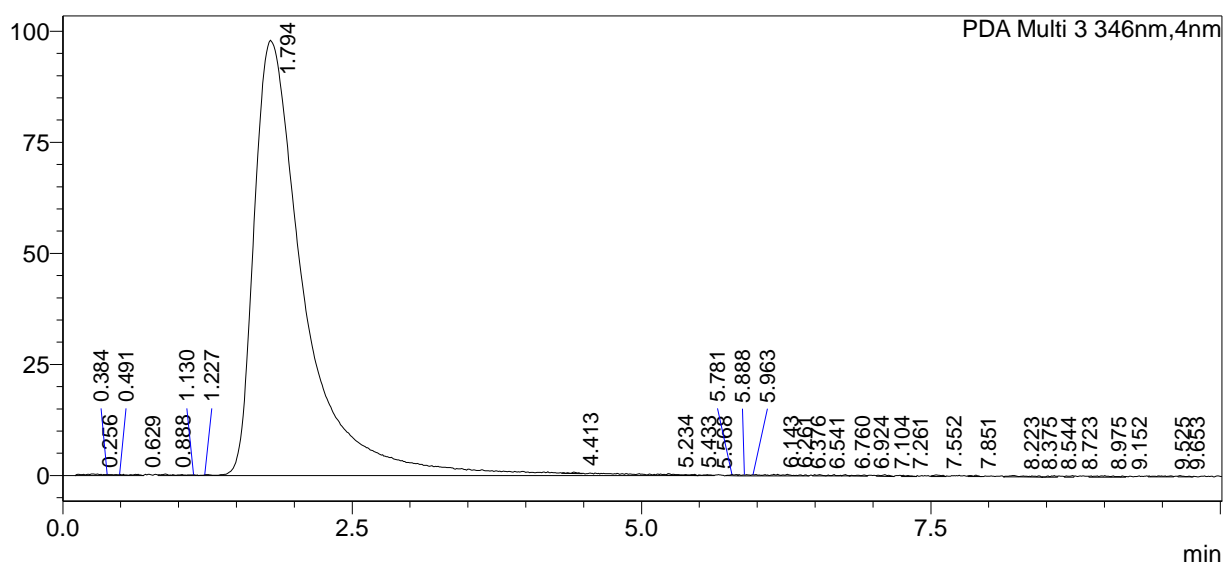

## <Peak Table>

PDA Ch3 346nm

| Peak# | Ret. Time | Area    | Height | Peak Purity Index    |
|-------|-----------|---------|--------|----------------------|
| 1     | 0.256     | 3587    | 366    | Cannot be calculated |
| 2     | 0.384     | 1046    | 292    | Cannot be calculated |
| 3     | 0.491     | 1541    | 292    | Cannot be calculated |
| 4     | 0.629     | 1173    | 266    | Cannot be calculated |
| 5     | 0.888     | 1310    | 334    | Cannot be calculated |
| 6     | 1.130     | 1676    | 222    | Cannot be calculated |
| 7     | 1.227     | 1067    | 216    | Cannot be calculated |
| 8     | 1.794     | 2950084 | 97963  | 0.992915             |
| 9     | 4.413     | 1602    | 301    | Cannot be calculated |
| 10    | 5.234     | 1467    | 328    | Cannot be calculated |
| 11    | 5.433     | 1326    | 210    | Cannot be calculated |
| 12    | 5.568     | 1388    | 214    | Cannot be calculated |
| 13    | 5.781     | 1271    | 307    | Cannot be calculated |
| 14    | 5.888     | 1202    | 204    | Cannot be calculated |
| 15    | 5.963     | 1063    | 234    | Cannot be calculated |
| 16    | 6.143     | 2037    | 316    | Cannot be calculated |
| 17    | 6.261     | 1112    | 325    | Cannot be calculated |
| 18    | 6.376     | 1108    | 251    | Cannot be calculated |
| 19    | 6.541     | 1495    | 287    | Cannot be calculated |
| 20    | 6.760     | 1207    | 272    | Cannot be calculated |
| 21    | 6.924     | 1370    | 246    | Cannot be calculated |
| 22    | 7.104     | 1875    | 389    | Cannot be calculated |

| Peak# | Ret. Time | Area    | Height | Peak Purity Index    |
|-------|-----------|---------|--------|----------------------|
| 23    | 7.261     | 1181    | 272    | Cannot be calculated |
| 24    | 7.552     | 1887    | 360    | Cannot be calculated |
| 25    | 7.851     | 1172    | 210    | Cannot be calculated |
| 26    | 8.223     | 1544    | 295    | Cannot be calculated |
| 27    | 8.375     | 1951    | 254    | Cannot be calculated |
| 28    | 8.544     | 1391    | 258    | Cannot be calculated |
| 29    | 8.723     | 1098    | 327    | Cannot be calculated |
| 30    | 8.975     | 2256    | 234    | Cannot be calculated |
| 31    | 9.152     | 1117    | 238    | Cannot be calculated |
| 32    | 9.525     | 2553    | 241    | Cannot be calculated |
| 33    | 9.653     | 1230    | 300    | Cannot be calculated |
| Total |           | 2998389 | 106823 |                      |

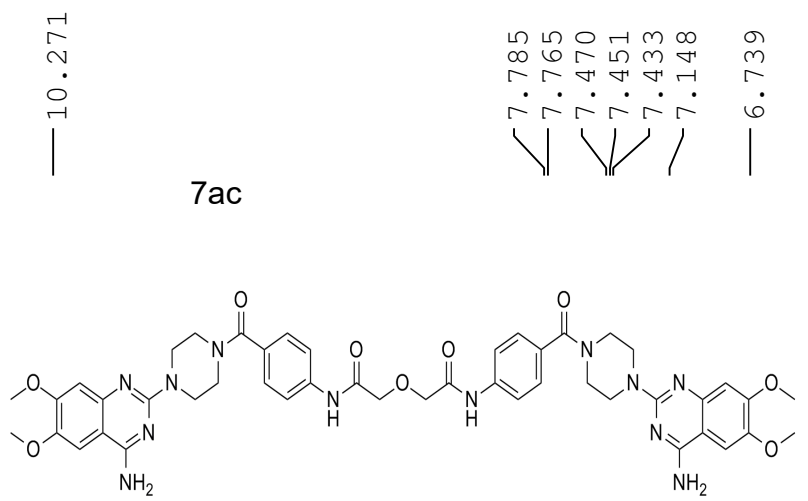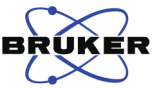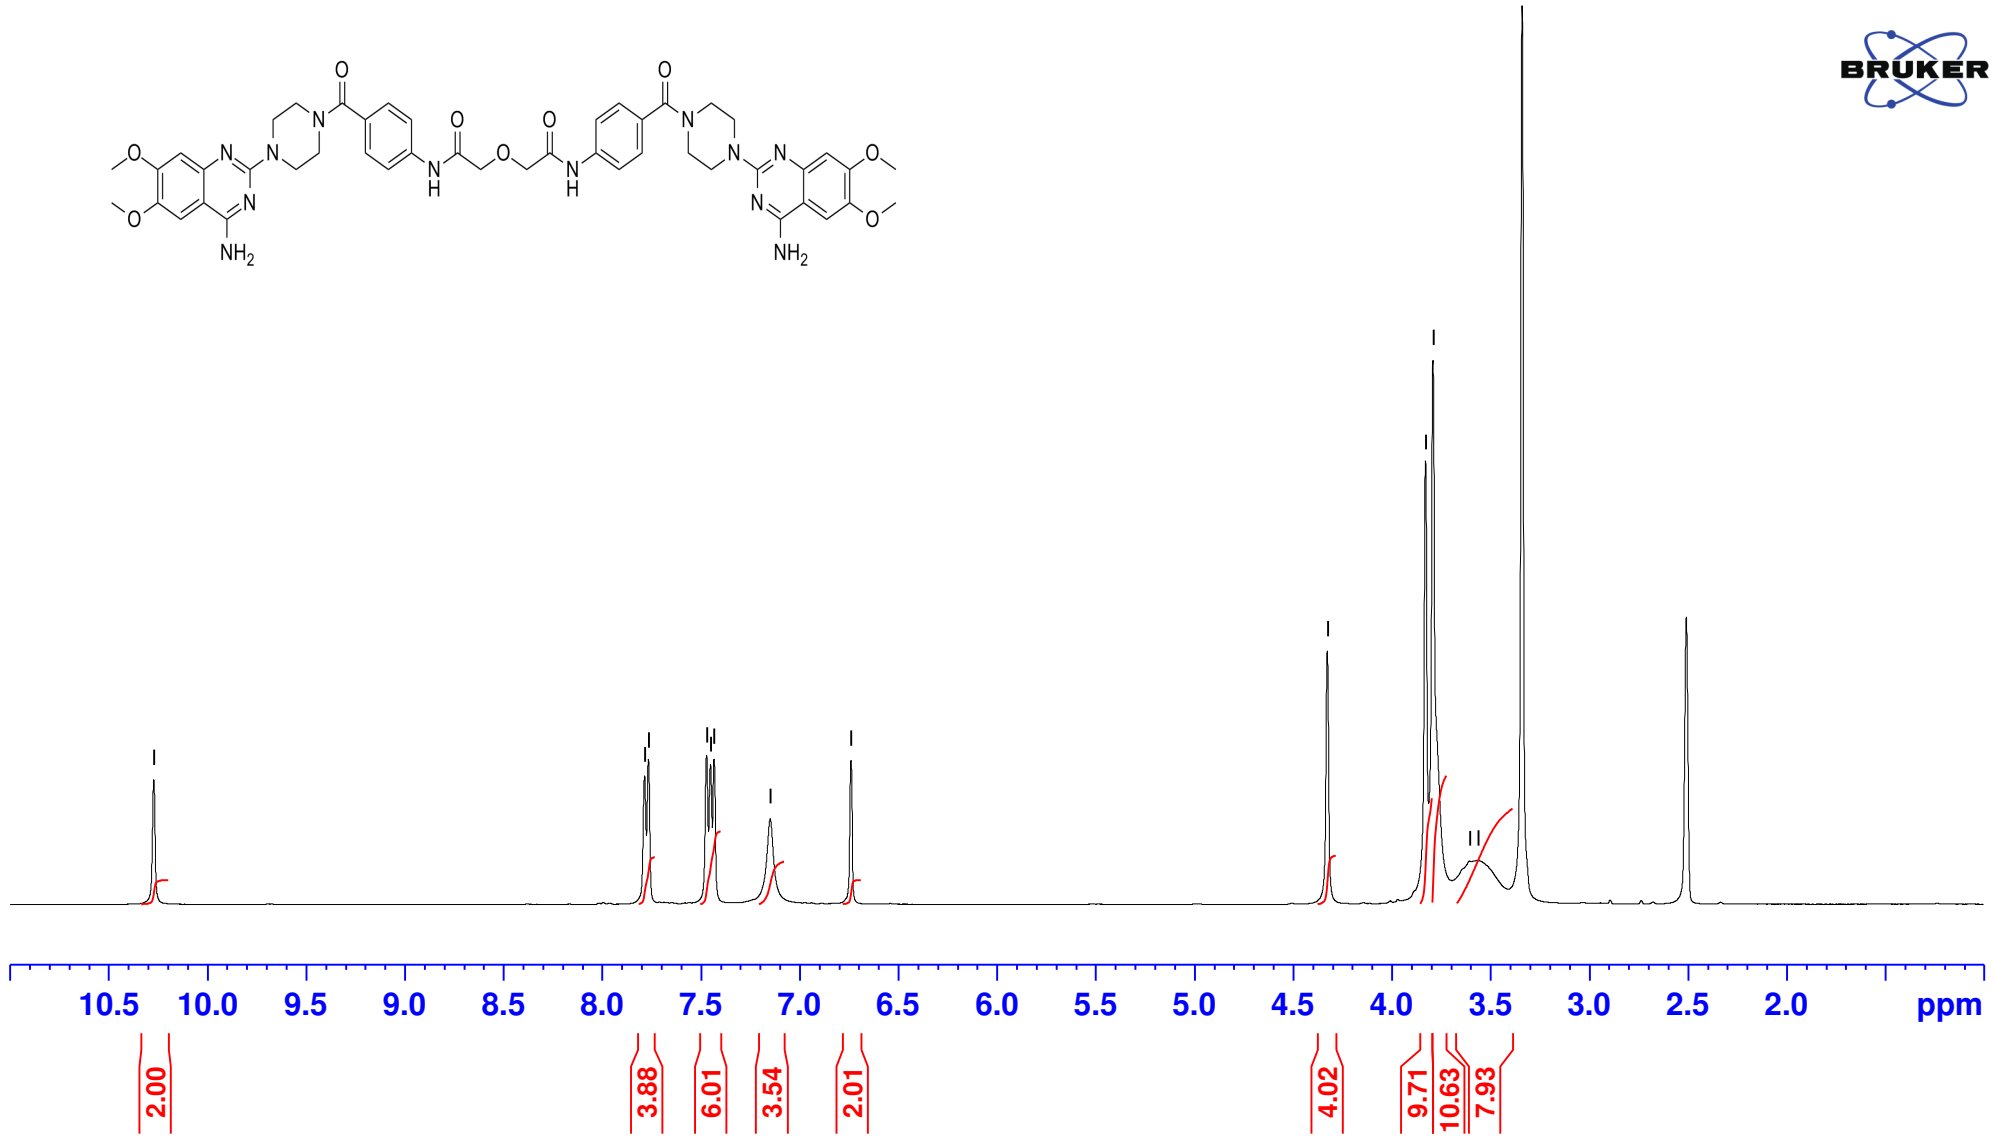

169.40  
168.88

161.62  
158.77

154.71

149.18

145.52

139.99

131.34  
128.64

119.61

105.68  
104.15  
103.45

71.33

56.31  
55.88

44.13

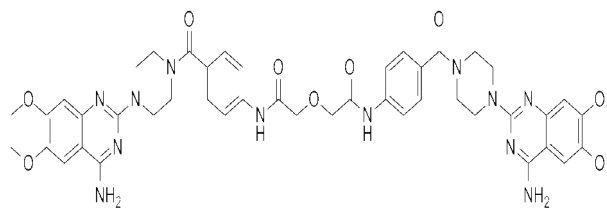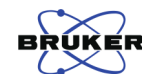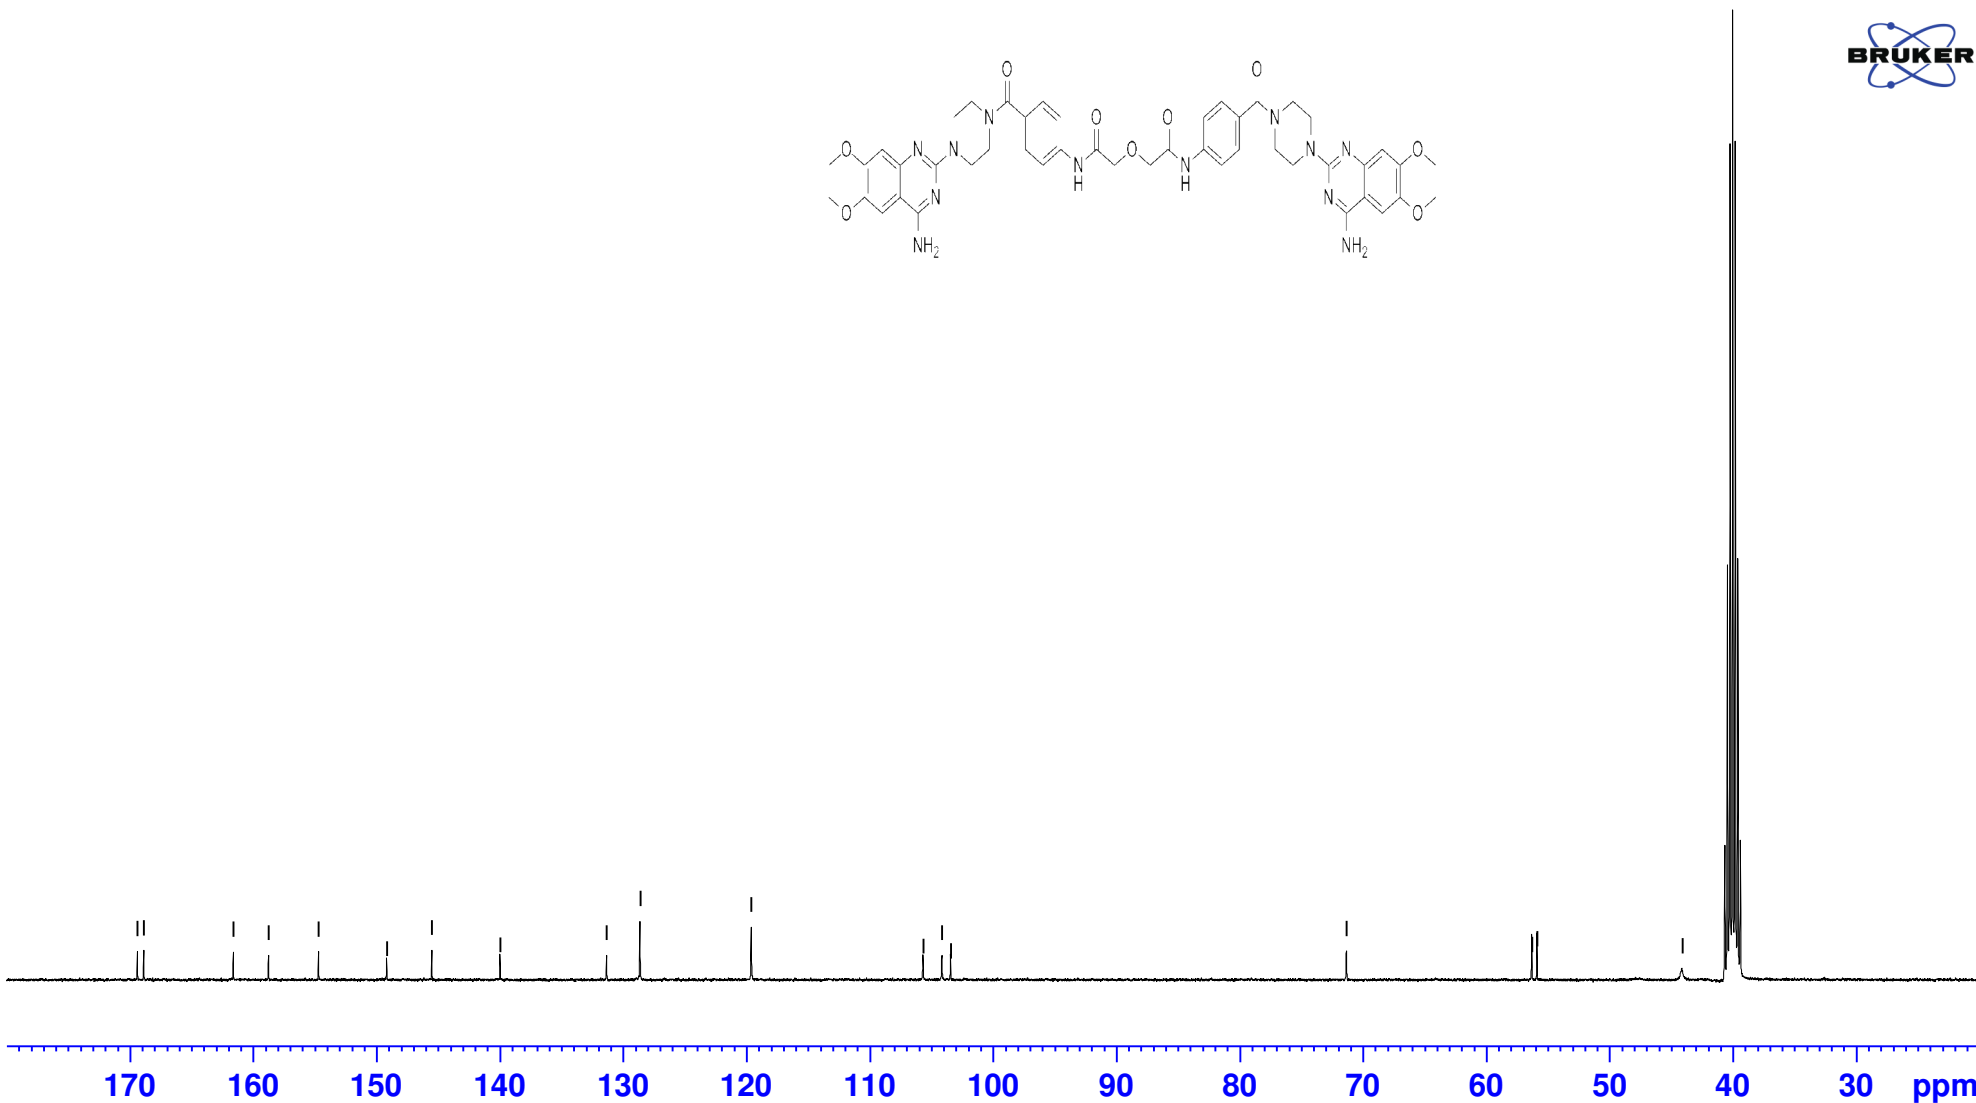

# ==== Shimadzu LabSolutions Data Report ====

Sample ID : 1                      Acquired                      1/4/2020 8:38:49 PM  
Data Filename : CF-F-22.lcd

## <Chromatogram>

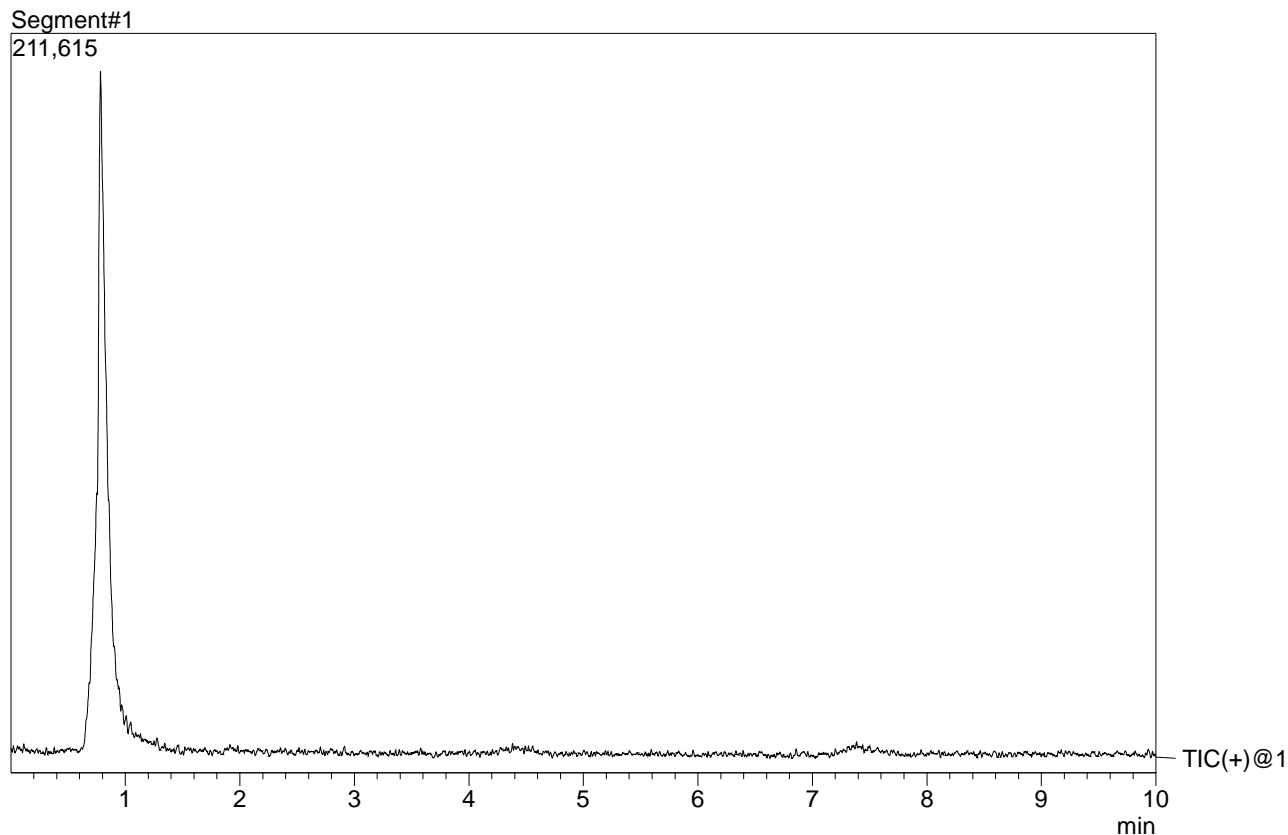

## <Spectrum>

R.Time:----(Scan#:----)  
MassPeaks:501 BasePeak:915.15(29039)  
Spectrum Mode:Averaged 0.620-1.025(373-616)  
BG Mode:None Polarity:Positive Segment 1 - Event 1

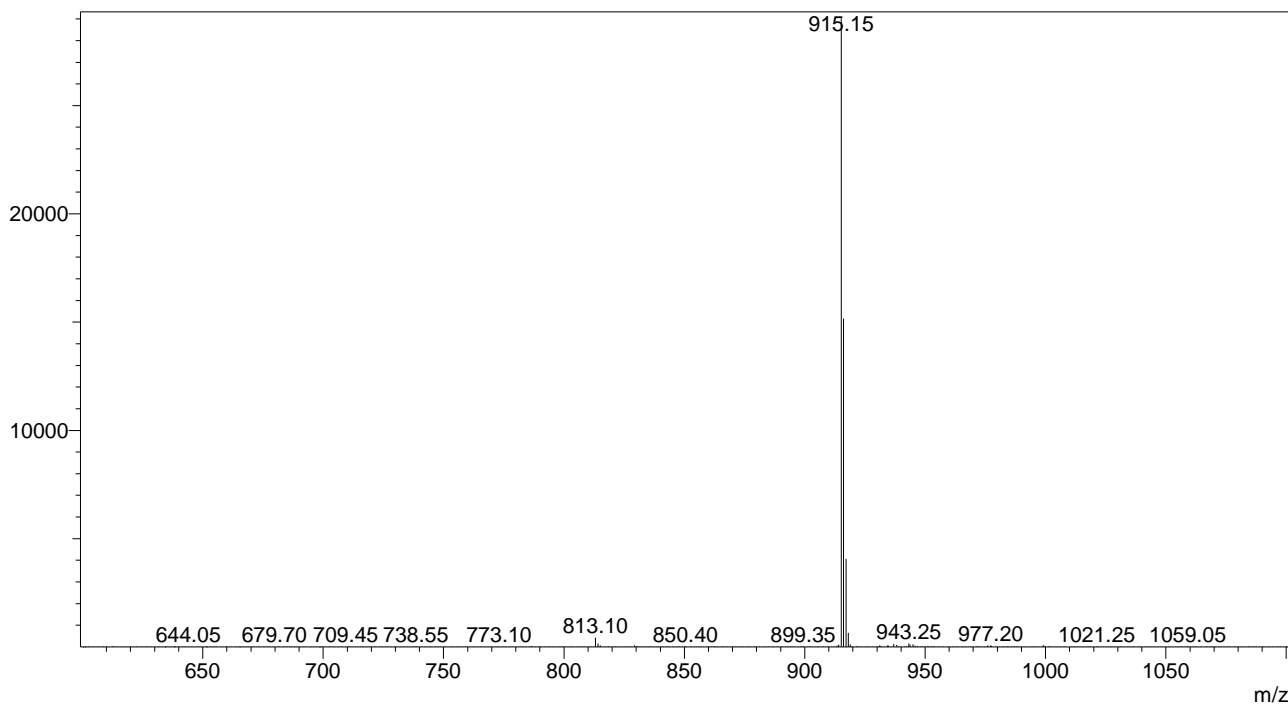



# Analysis Report

## <Sample Information>

Sample Name : CF\_22  
 Sample ID : CF\_022  
 Data Filename : CF\_Batch\_13\_6\_20\_6182020\_022.lcd  
 Method Filename : PDA\_6\_18\_20\_batch.lcm  
 Batch Filename : CF\_Batch\_13\_6\_20.lcb  
 Vial # : 1-22  
 Injection Volume : 5 uL  
 Date Acquired : 6/18/2020 2:17:07 PM  
 Date Processed : 6/18/2020 2:27:13 PM  
 Sample Type : Unknown  
 Acquired by : System Administrator  
 Processed by : System Administrator

## <Chromatogram>

mAU

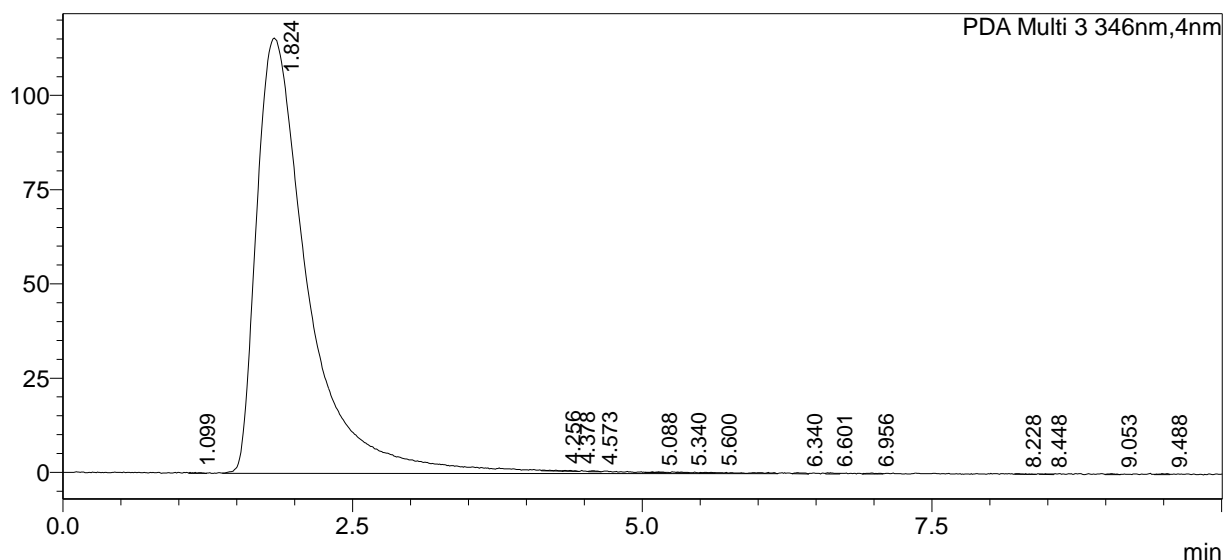

## <Peak Table>

PDA Ch3 346nm

| Peak# | Ret. Time | Area    | Height | Peak Purity Index    |
|-------|-----------|---------|--------|----------------------|
| 1     | 1.099     | 1139    | 268    | Cannot be calculated |
| 2     | 1.824     | 3591628 | 115478 | 0.989305             |
| 3     | 4.256     | 1273    | 235    | Cannot be calculated |
| 4     | 4.378     | 1068    | 227    | Cannot be calculated |
| 5     | 4.573     | 1091    | 260    | Cannot be calculated |
| 6     | 5.088     | 1374    | 232    | Cannot be calculated |
| 7     | 5.340     | 1076    | 248    | Cannot be calculated |
| 8     | 5.600     | 1219    | 225    | Cannot be calculated |
| 9     | 6.340     | 1575    | 284    | Cannot be calculated |
| 10    | 6.601     | 1517    | 297    | Cannot be calculated |
| 11    | 6.956     | 1533    | 159    | Cannot be calculated |
| 12    | 8.228     | 1230    | 198    | Cannot be calculated |
| 13    | 8.448     | 1032    | 158    | Cannot be calculated |
| 14    | 9.053     | 1059    | 226    | Cannot be calculated |
| 15    | 9.488     | 1320    | 235    | Cannot be calculated |
| Total |           | 3609135 | 118729 |                      |

— 10.322

— 8.547

7.829  
7.699  
7.644  
7.624  
7.415  
7.396  
7.376  
7.120  
7.102

3.919  
3.863  
3.839  
3.759  
3.531

— 2.708

7ba

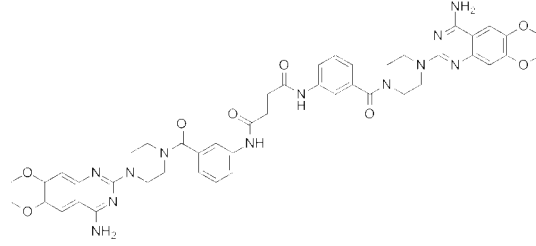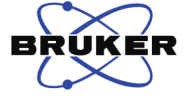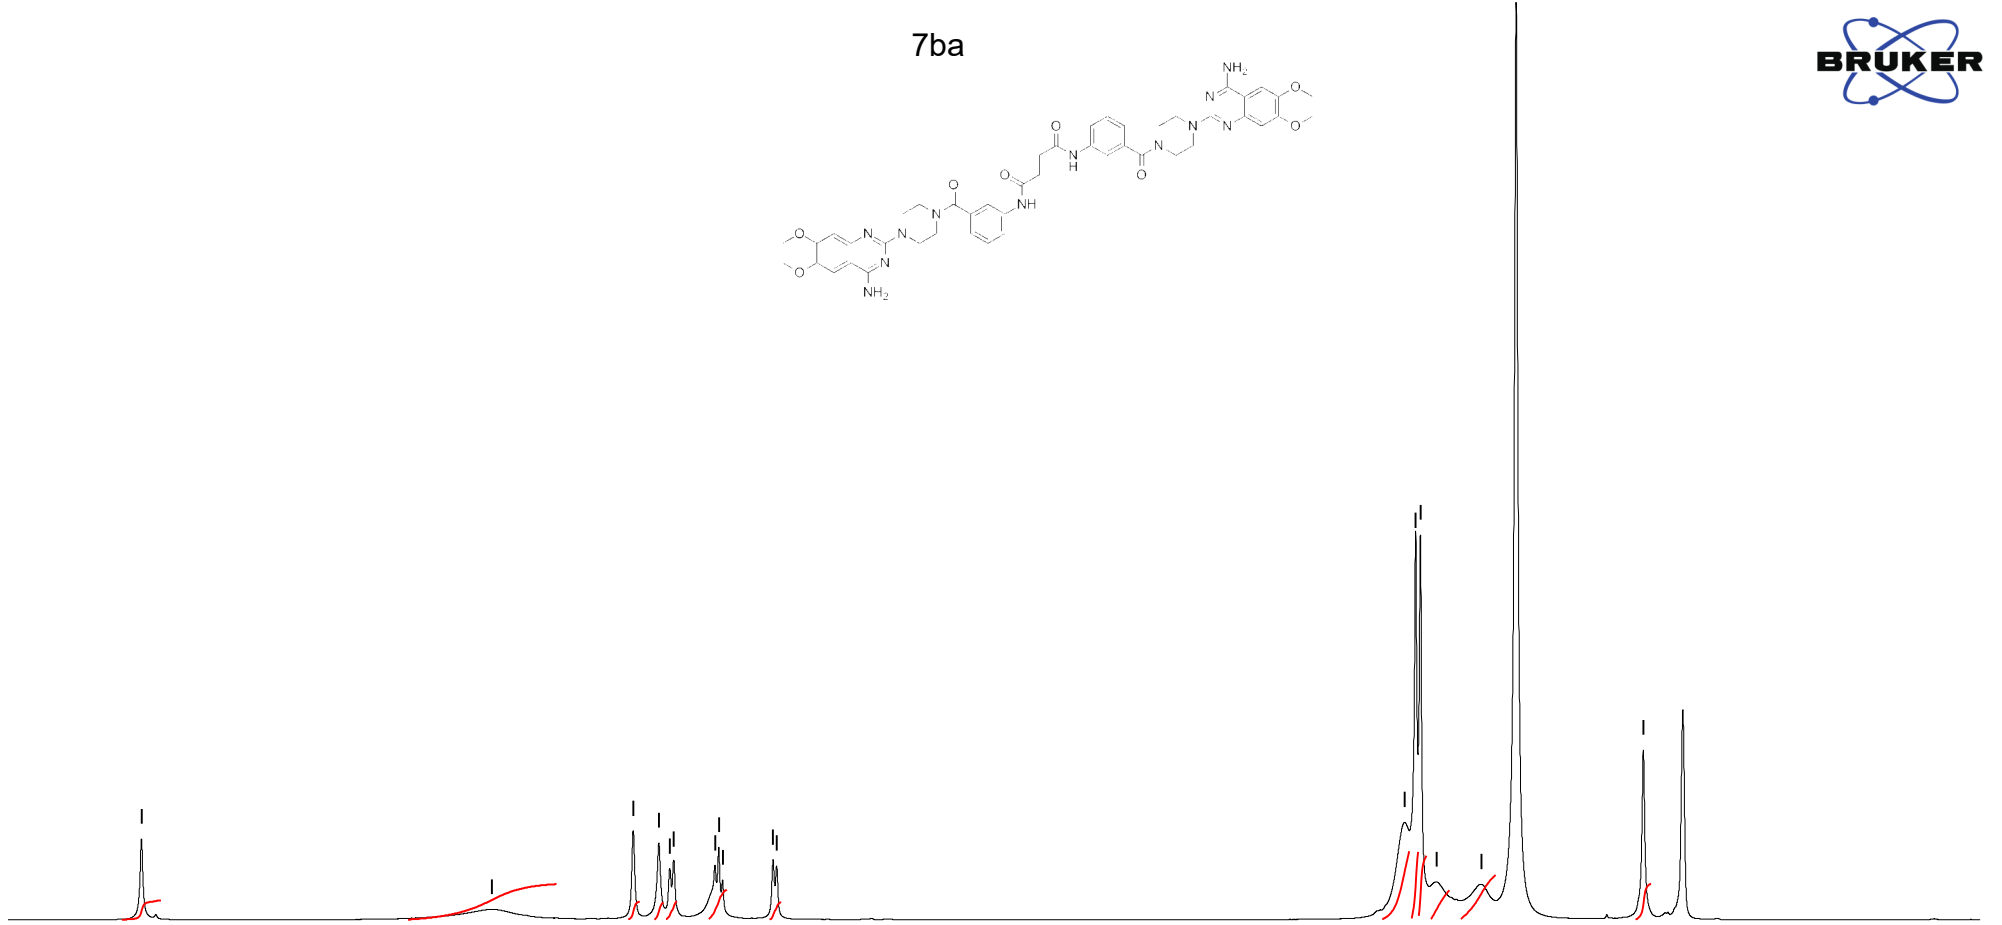

10.5 10.0 9.5 9.0 8.5 8.0 7.5 7.0 6.5 6.0 5.5 5.0 4.5 4.0 3.5 3.0 2.5 2.0 ppm

2.12

3.94

2.00

1.92

2.08

3.30

1.93

7.59

7.70

7.16

3.30

4.96

3.98

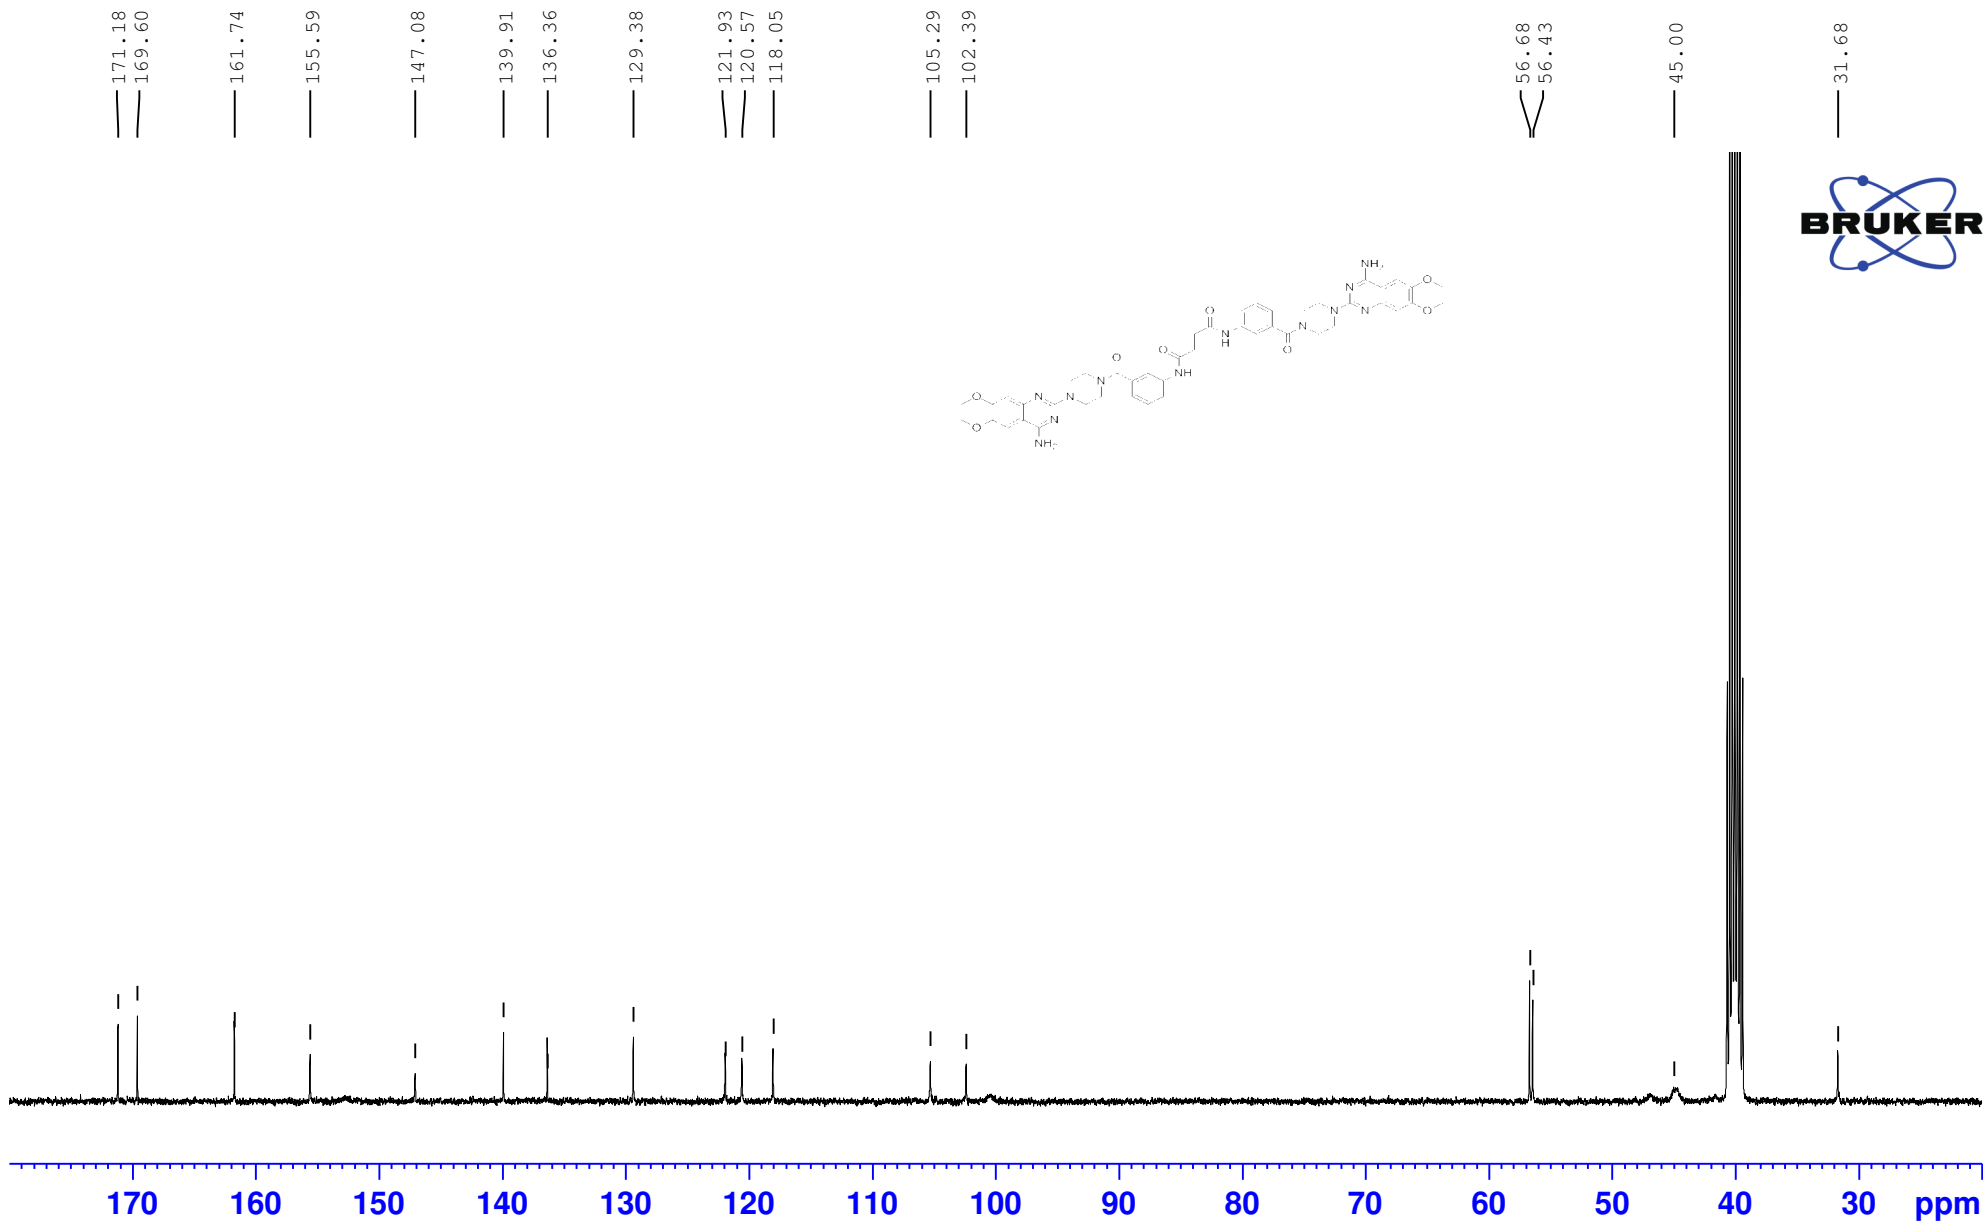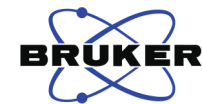



# ==== Shimadzu LabSolutions Data Report ====

Sample ID : 1                      Acquired                      1/4/2020 7:18:49 PM  
Data Filename : CF-F-10.lcd

## <Chromatogram>

Segment#1

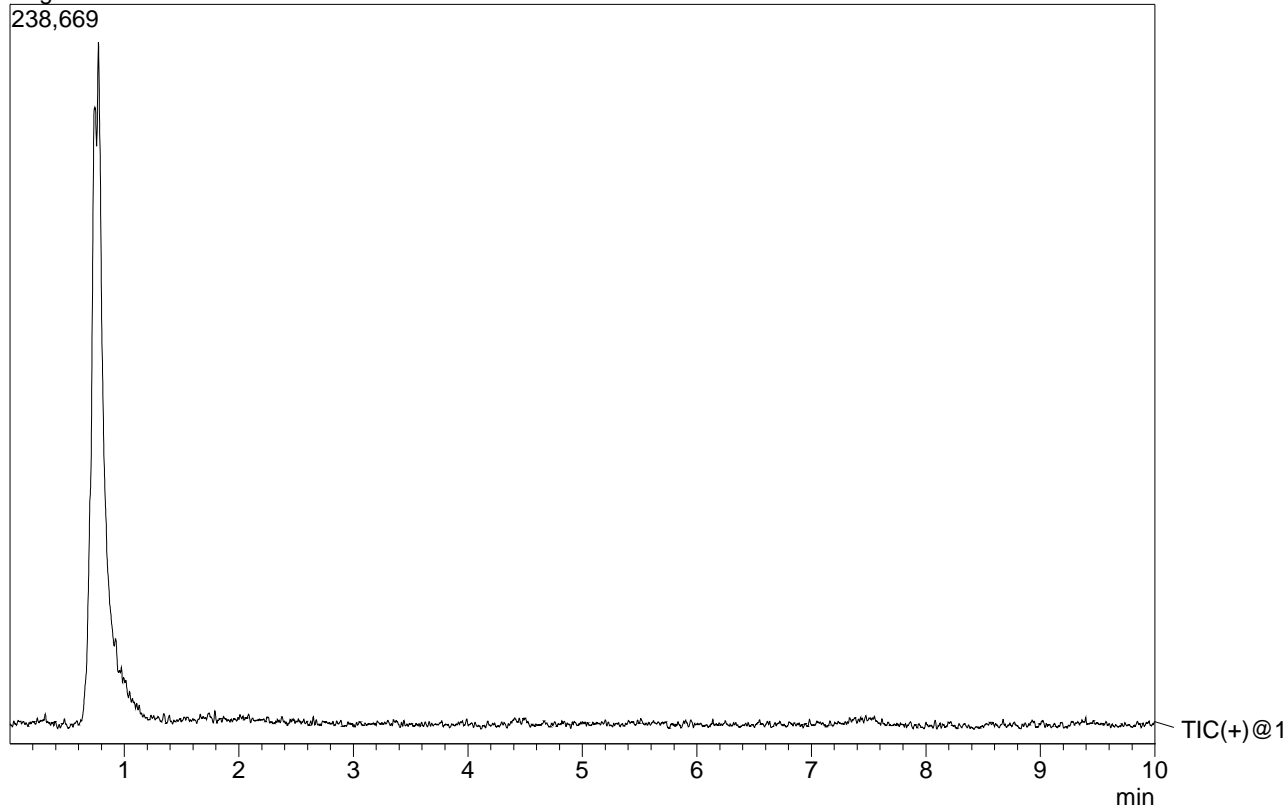

## <Spectrum>

R.Time:----(Scan#:----)  
MassPeaks:526    BasePeak:899.20(31318)  
Spectrum Mode:Averaged 0.602-1.115(362-670)  
BG Mode:None    Polarity:Positive    Segment 1 - Event 1

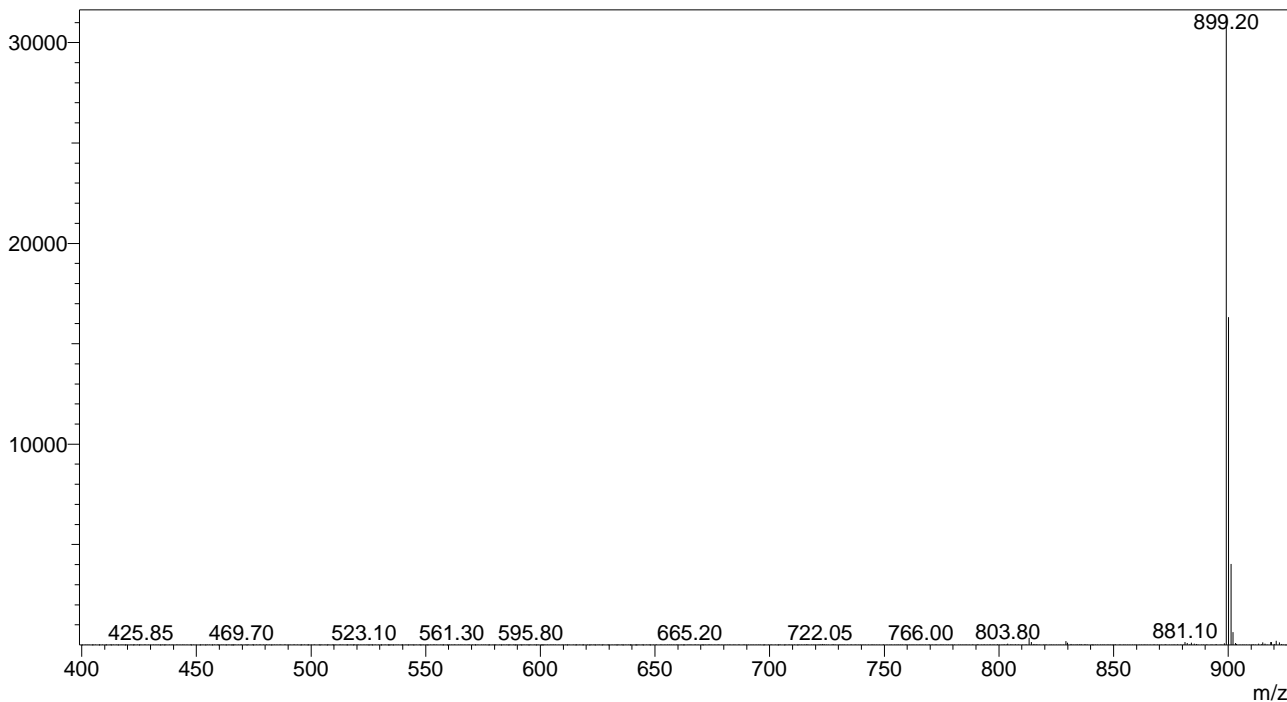



# Analysis Report

## <Sample Information>

Sample Name : CF\_10  
 Sample ID : CF\_010  
 Data Filename : CF\_Batch\_13\_6\_20\_6182020\_010.lcd  
 Method Filename : PDA\_6\_18\_20\_batch.lcm  
 Batch Filename : CF\_Batch\_13\_6\_20.lcb  
 Vial # : 1-10  
 Injection Volume : 5 uL  
 Date Acquired : 6/18/2020 11:50:10 AM  
 Date Processed : 6/18/2020 12:00:16 PM

Sample Type : Unknown  
 Acquired by : System Administrator  
 Processed by : System Administrator

## <Chromatogram>

mAU

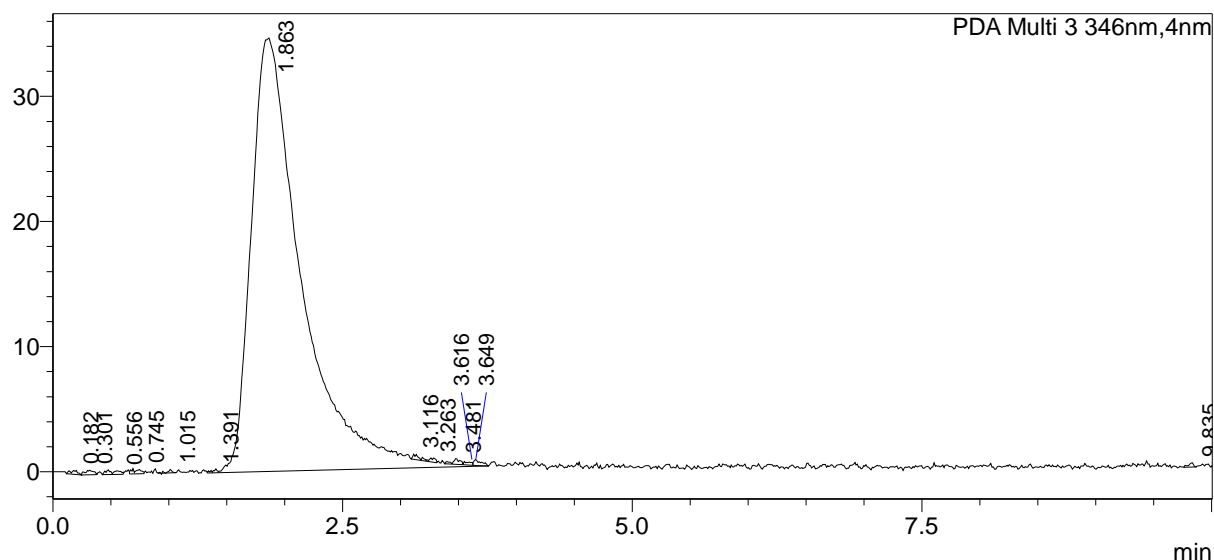

## <Peak Table>

PDA Ch3 346nm

| Peak# | Ret. Time | Area    | Height | Conc.  | Peak Purity Index    |
|-------|-----------|---------|--------|--------|----------------------|
| 1     | 0.182     | 1320    | 317    | 0.125  | Cannot be calculated |
| 2     | 0.301     | 1973    | 358    | 0.186  | Cannot be calculated |
| 3     | 0.556     | 2398    | 292    | 0.227  | Cannot be calculated |
| 4     | 0.745     | 1914    | 348    | 0.181  | Cannot be calculated |
| 5     | 1.015     | 706     | 287    | 0.067  | Cannot be calculated |
| 6     | 1.391     | 963     | 205    | 0.091  | Cannot be calculated |
| 7     | 1.863     | 1040338 | 34644  | 98.302 | 0.989544             |
| 8     | 3.116     | 1553    | 405    | 0.147  | Cannot be calculated |
| 9     | 3.263     | 1095    | 297    | 0.103  | Cannot be calculated |
| 10    | 3.481     | 2047    | 454    | 0.193  | Cannot be calculated |
| 11    | 3.616     | 1065    | 222    | 0.101  | Cannot be calculated |
| 12    | 3.649     | 1917    | 450    | 0.181  | Cannot be calculated |
| 13    | 9.835     | 1014    | 333    | 0.096  | Cannot be calculated |
| Total |           | 1058303 | 38612  |        |                      |

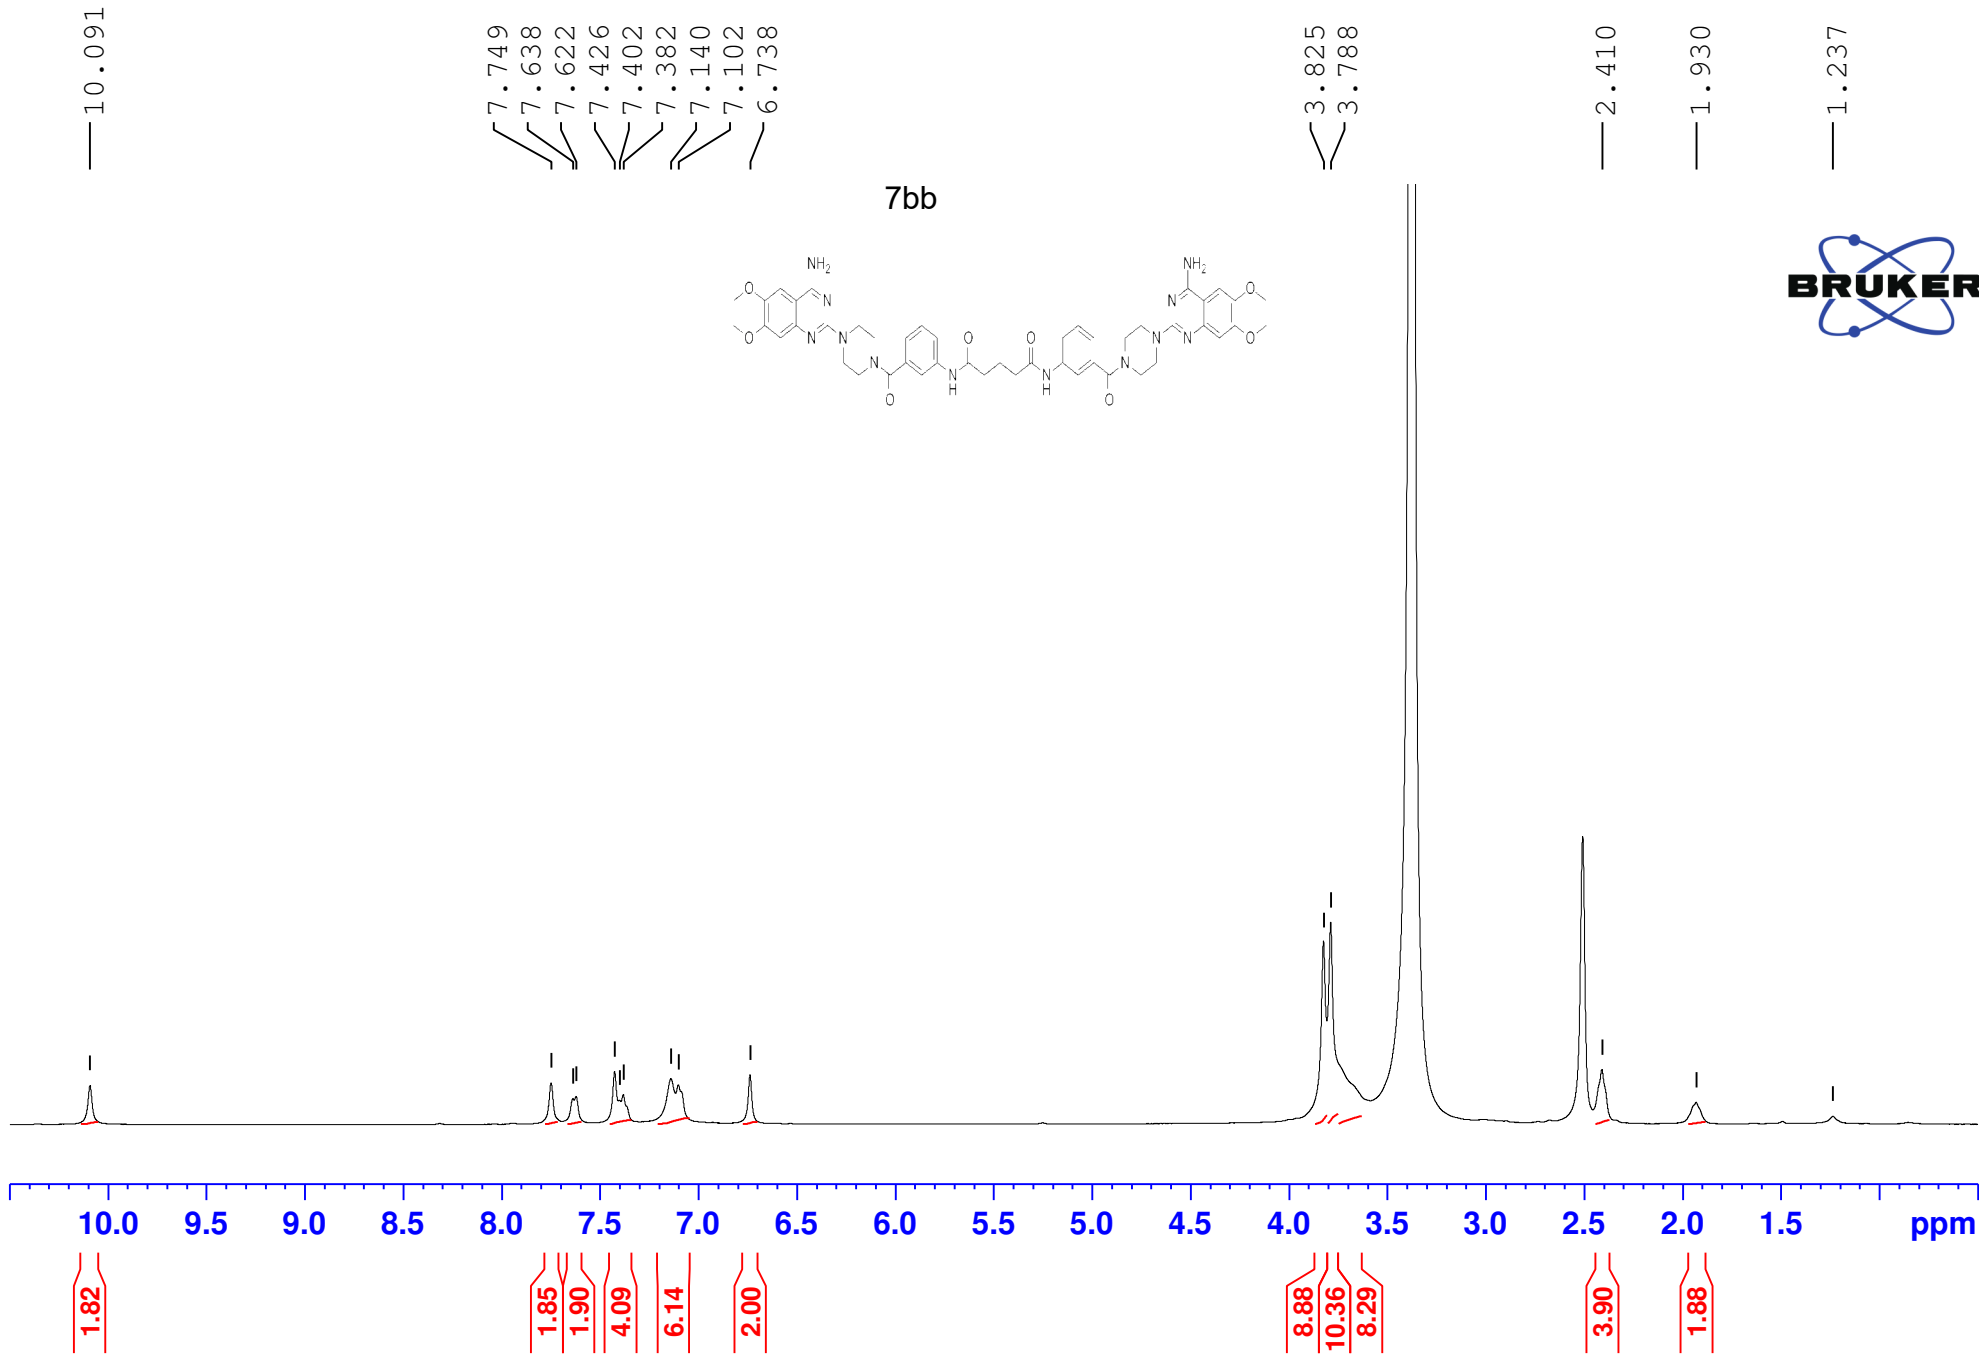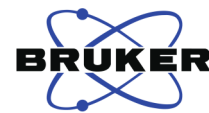

171.57  
169.44

161.62  
158.79

154.72

149.18

145.55

139.77

136.78

129.33

121.98  
120.50  
118.15

105.71  
104.15  
103.48

56.31  
55.89

47.55

44.06

36.03

21.28

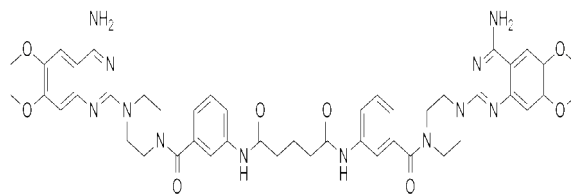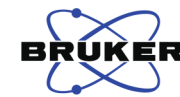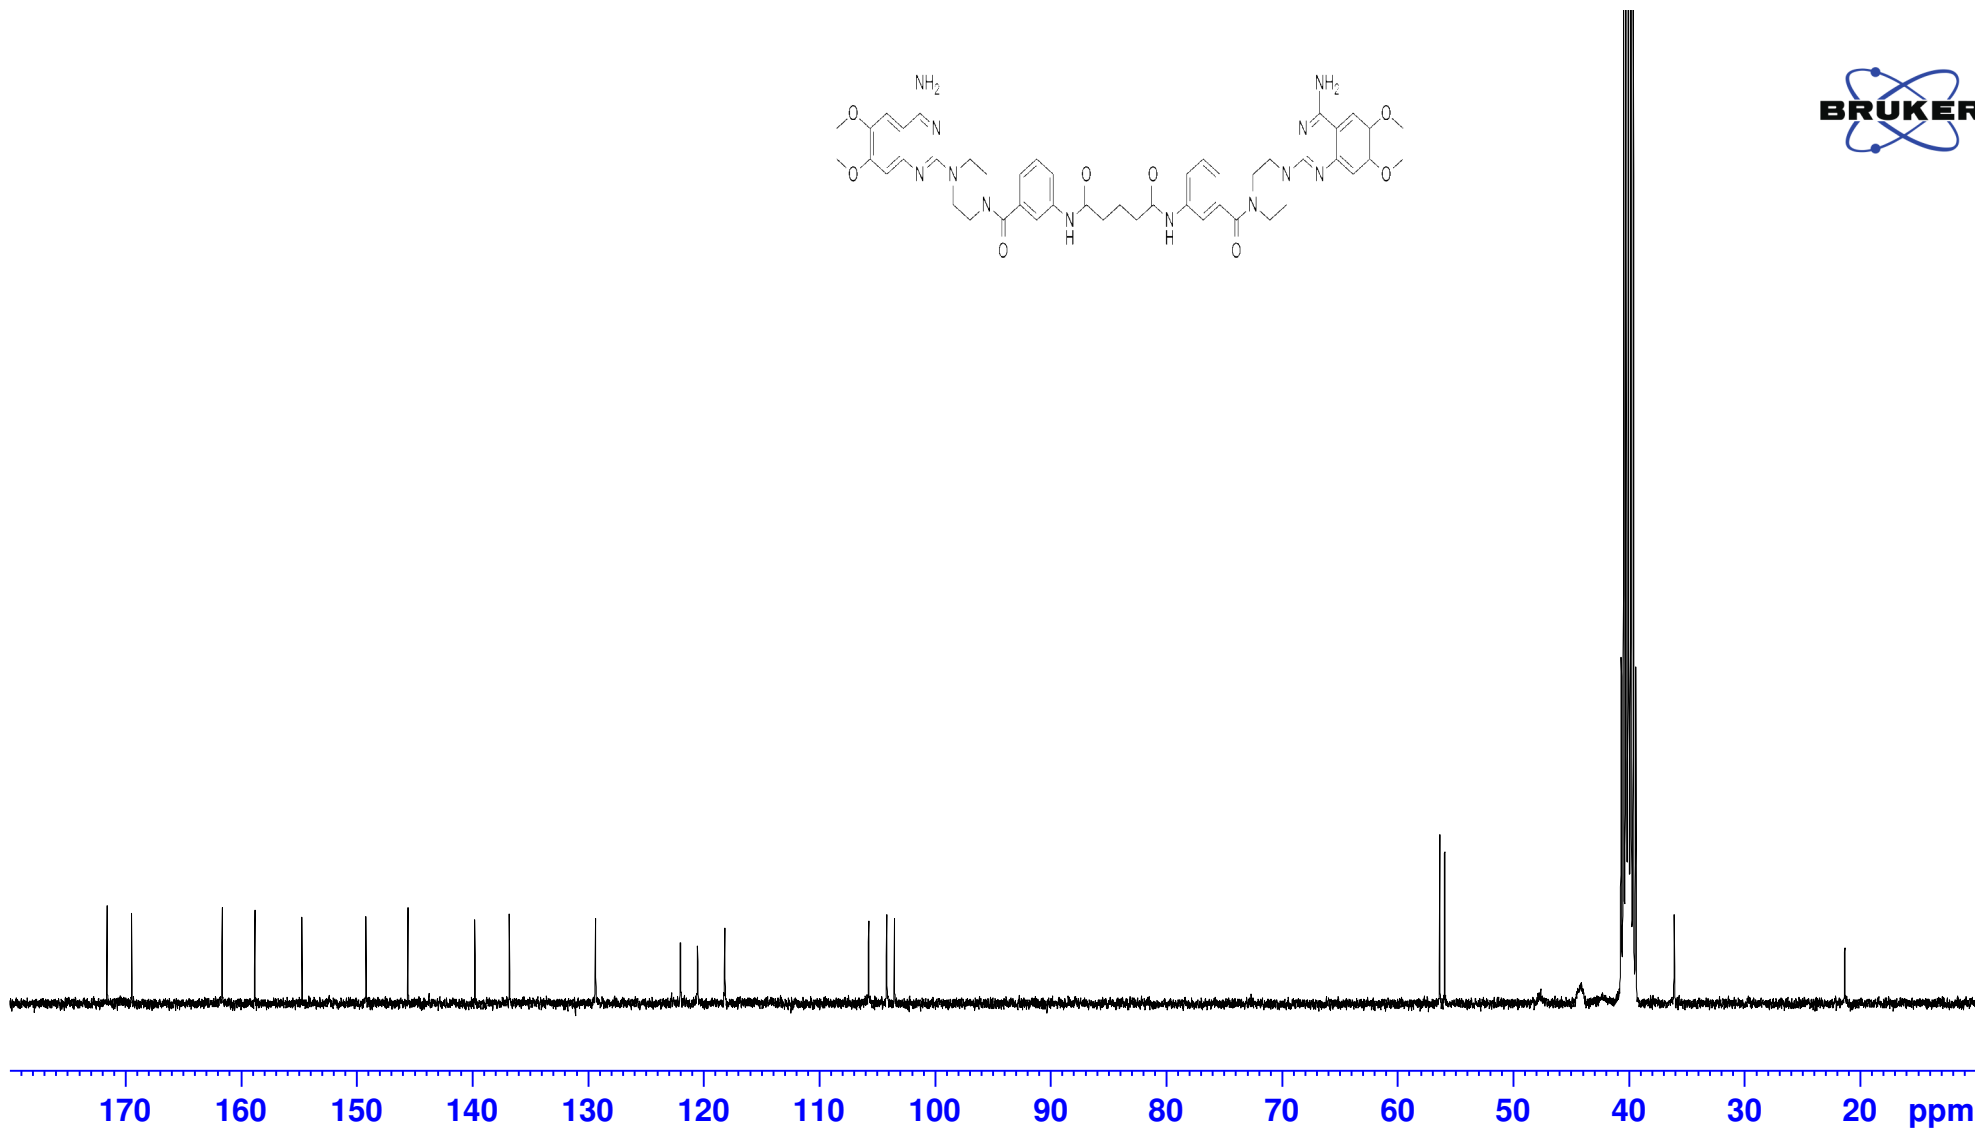

# ==== Shimadzu LabSolutions Data Report ====

Sample ID : 1                      Acquired                      1/4/2020 7:29:47 PM  
Data Filename : CF-F-11.lcd

<Chromatogram>

Segment#1

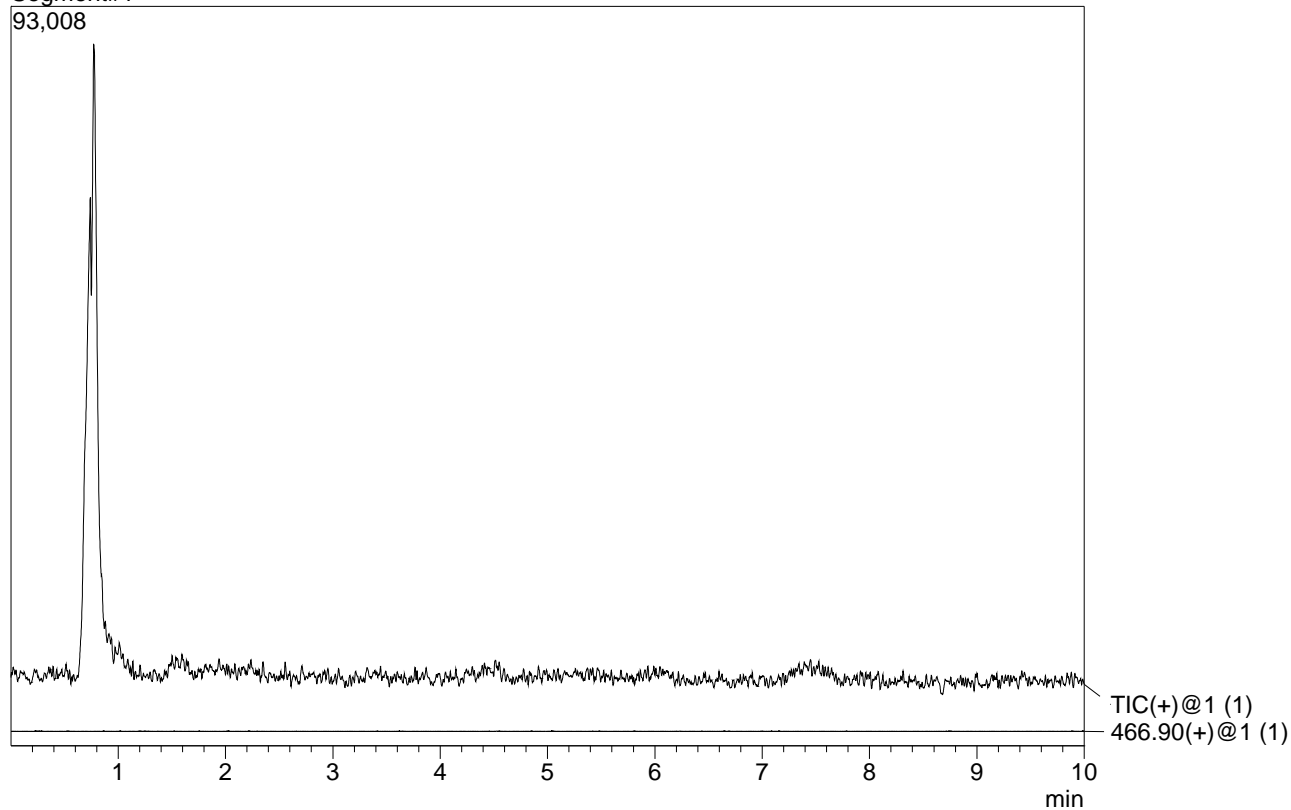

<Spectrum>

R.Time:----(Scan#:----)  
MassPeaks:526 BasePeak:913.20(15598)  
Spectrum Mode:Averaged 0.620-0.943(373-567)  
BG Mode:None Polarity:Positive Segment 1 - Event 1

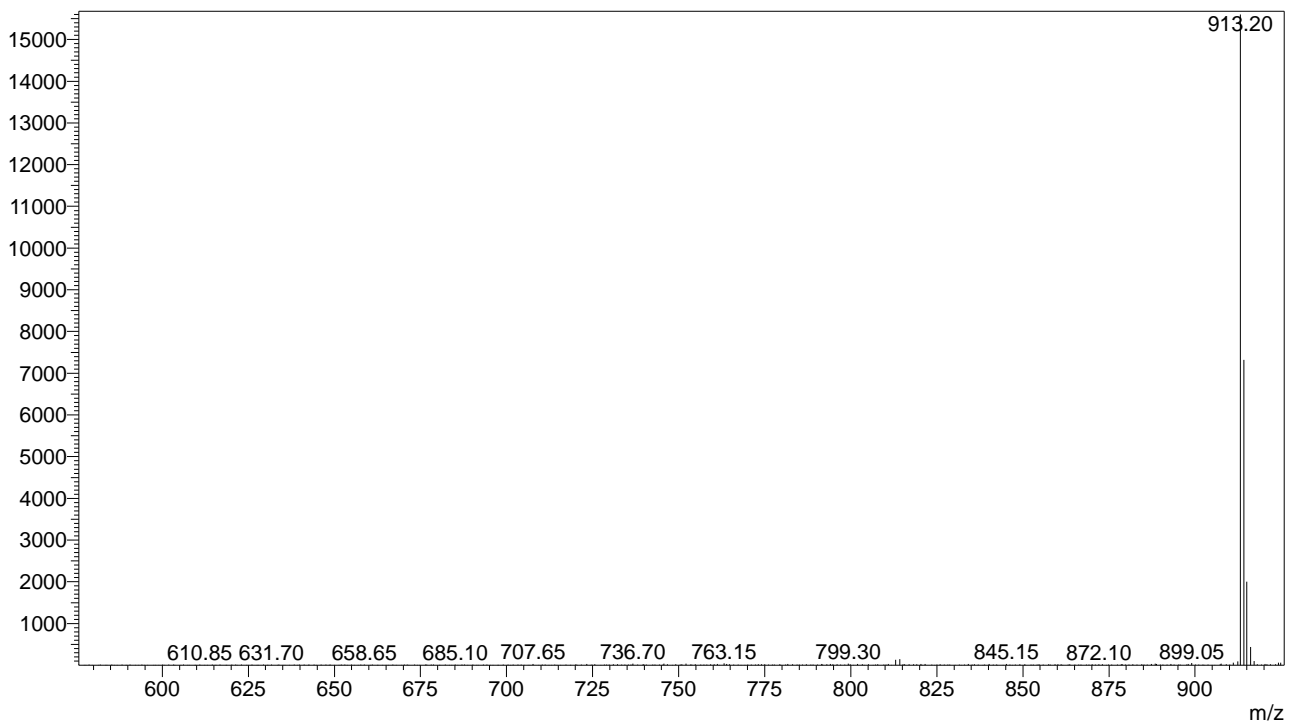



# Analysis Report

## <Sample Information>

Sample Name : CF\_11  
 Sample ID : CF\_011  
 Data Filename : CF\_Batch\_13\_6\_20\_6182020\_011.lcd  
 Method Filename : PDA\_6\_18\_20\_batch.lcm  
 Batch Filename : CF\_Batch\_13\_6\_20.lcb  
 Vial # : 1-11  
 Injection Volume : 5 uL  
 Date Acquired : 6/18/2020 12:00:41 PM  
 Date Processed : 6/18/2020 12:10:47 PM

Sample Type : Unknown  
 Acquired by : System Administrator  
 Processed by : System Administrator

## <Chromatogram>

mAU

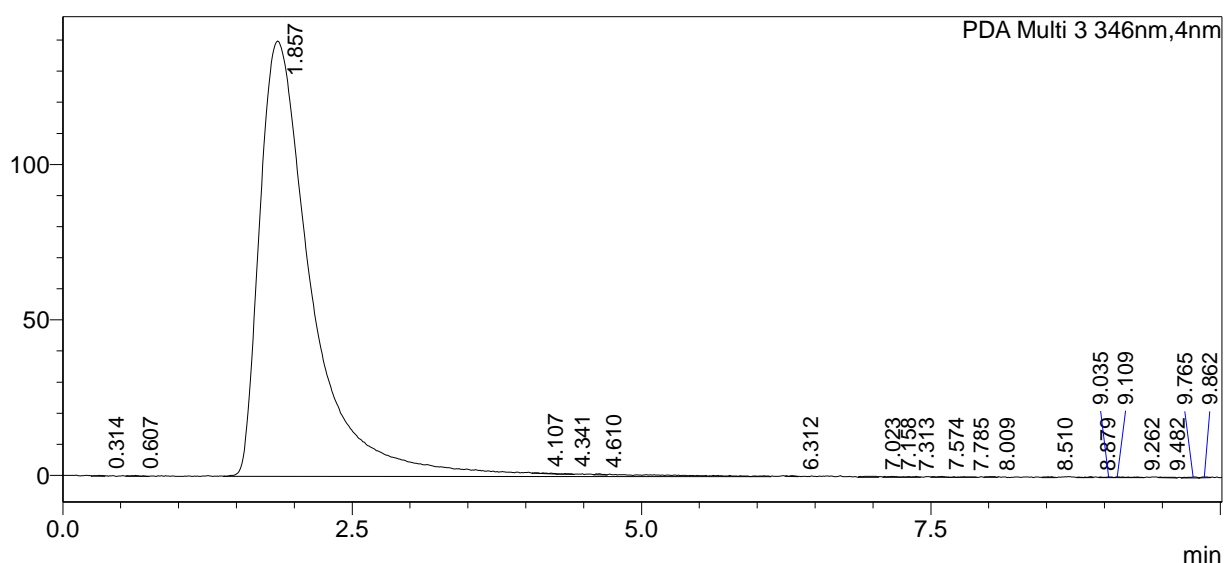

## <Peak Table>

PDA Ch3 346nm

| Peak# | Ret. Time | Area    | Height | Peak Purity Index    |
|-------|-----------|---------|--------|----------------------|
| 1     | 0.314     | 1109    | 213    | Cannot be calculated |
| 2     | 0.607     | 1617    | 203    | Cannot be calculated |
| 3     | 1.857     | 4401452 | 140021 | 0.988882             |
| 4     | 4.107     | 1585    | 227    | Cannot be calculated |
| 5     | 4.341     | 1000    | 245    | Cannot be calculated |
| 6     | 4.610     | 1695    | 349    | Cannot be calculated |
| 7     | 6.312     | 1153    | 308    | Cannot be calculated |
| 8     | 7.023     | 2850    | 335    | Cannot be calculated |
| 9     | 7.158     | 1766    | 299    | Cannot be calculated |
| 10    | 7.313     | 1639    | 233    | Cannot be calculated |
| 11    | 7.574     | 1389    | 239    | Cannot be calculated |
| 12    | 7.785     | 1310    | 203    | Cannot be calculated |
| 13    | 8.009     | 1361    | 288    | Cannot be calculated |
| 14    | 8.510     | 1231    | 262    | Cannot be calculated |
| 15    | 8.879     | 1343    | 270    | Cannot be calculated |
| 16    | 9.035     | 1306    | 217    | Cannot be calculated |
| 17    | 9.109     | 1153    | 270    | Cannot be calculated |
| 18    | 9.262     | 1134    | 190    | Cannot be calculated |
| 19    | 9.482     | 1466    | 253    | Cannot be calculated |
| 20    | 9.765     | 1480    | 290    | Cannot be calculated |
| 21    | 9.862     | 1015    | 248    | Cannot be calculated |
| Total |           | 4430054 | 145162 |                      |

— 10.255

7.818  
7.743  
7.724  
7.438  
7.153  
6.741

4.306  
3.827  
3.790

7bc

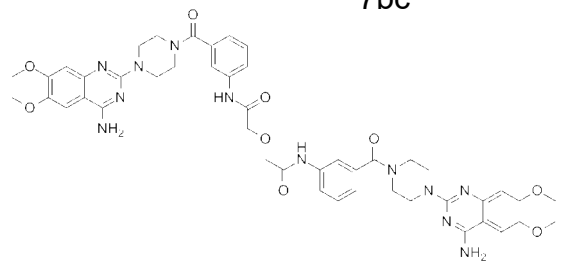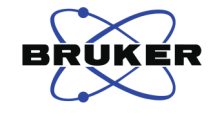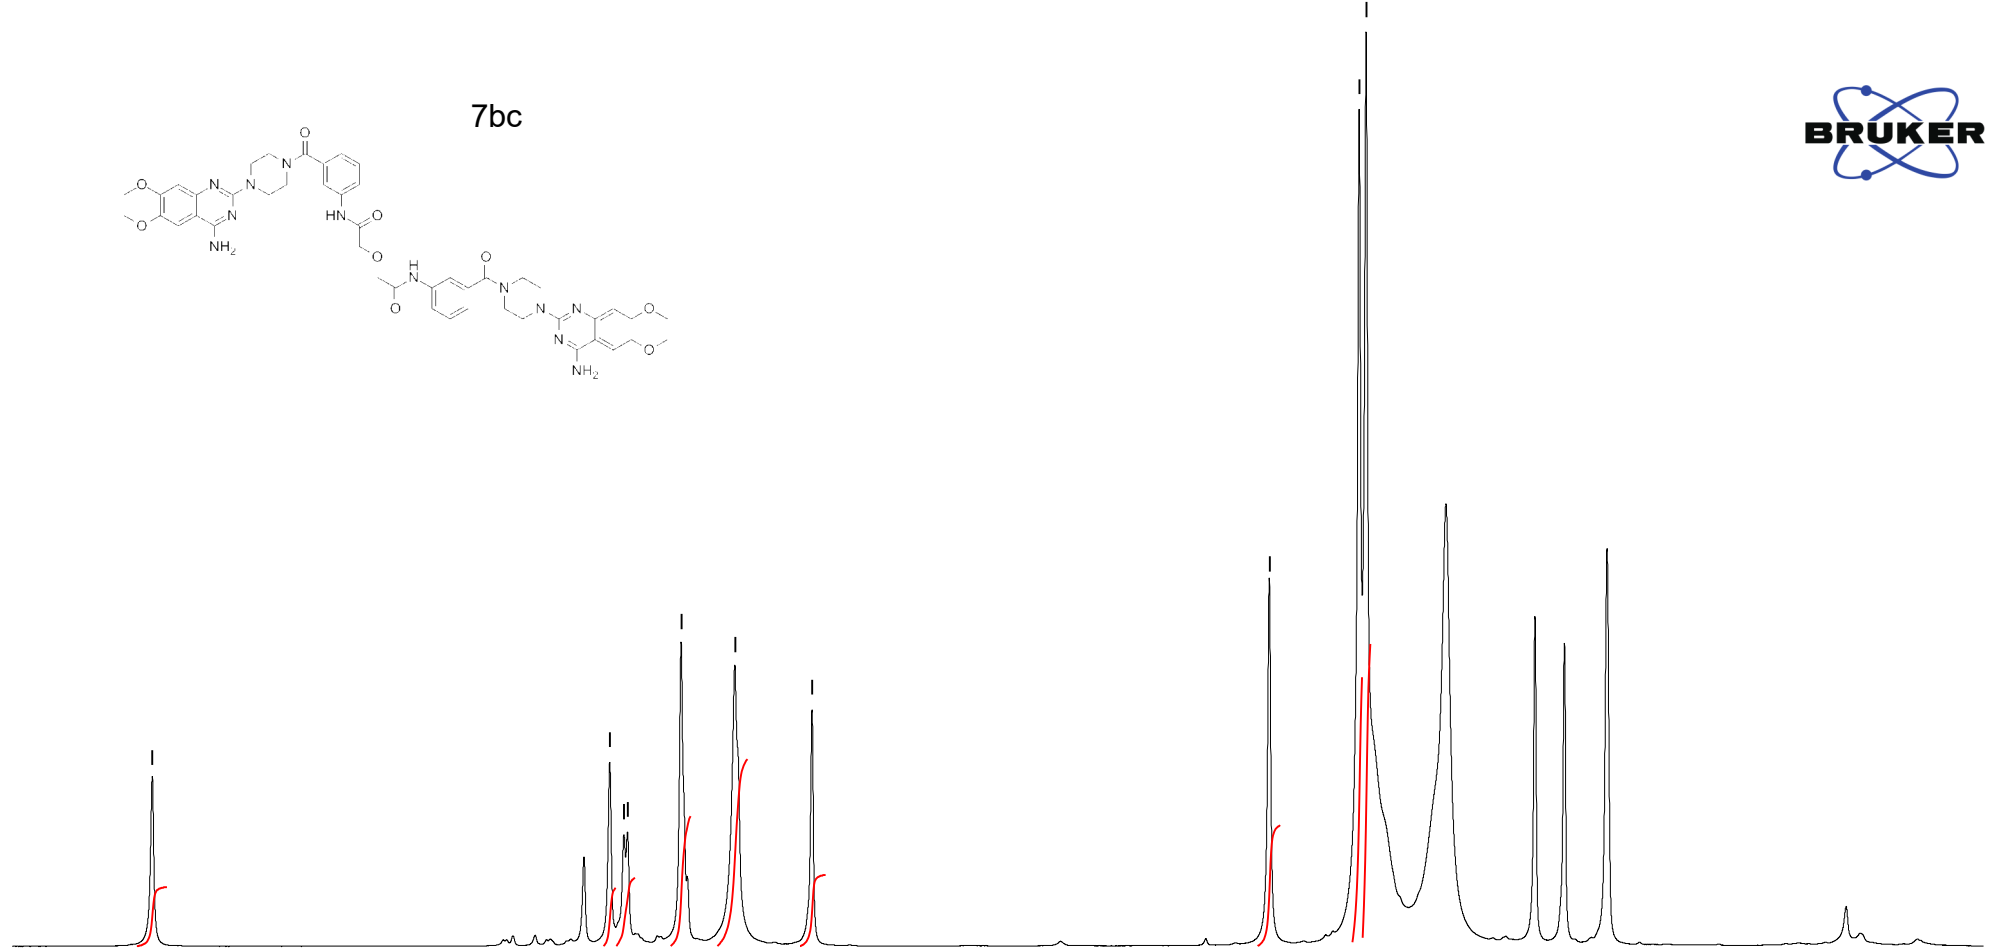

10.5 10.0 9.5 9.0 8.5 8.0 7.5 7.0 6.5 6.0 5.5 5.0 4.5 4.0 3.5 3.0 2.5 2.0 1.5 ppm

1.66

1.66

1.94

3.64

5.25

2.00

3.39

7.94

8.52



169.30  
168.82

162.78  
161.62

158.80

154.71

149.19

145.55

138.83  
136.86

129.44

122.71  
121.16  
118.79

105.71  
104.17  
103.49

71.31

56.32  
55.88

47.64

44.18  
42.26

36.24

31.25

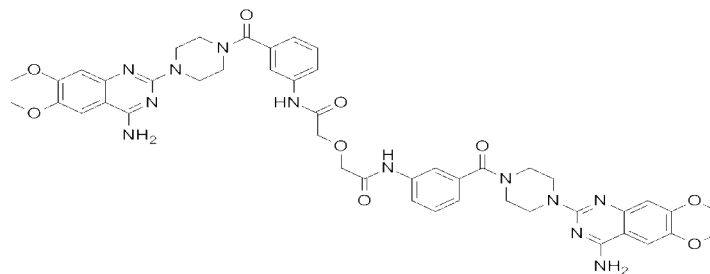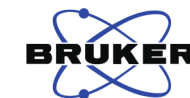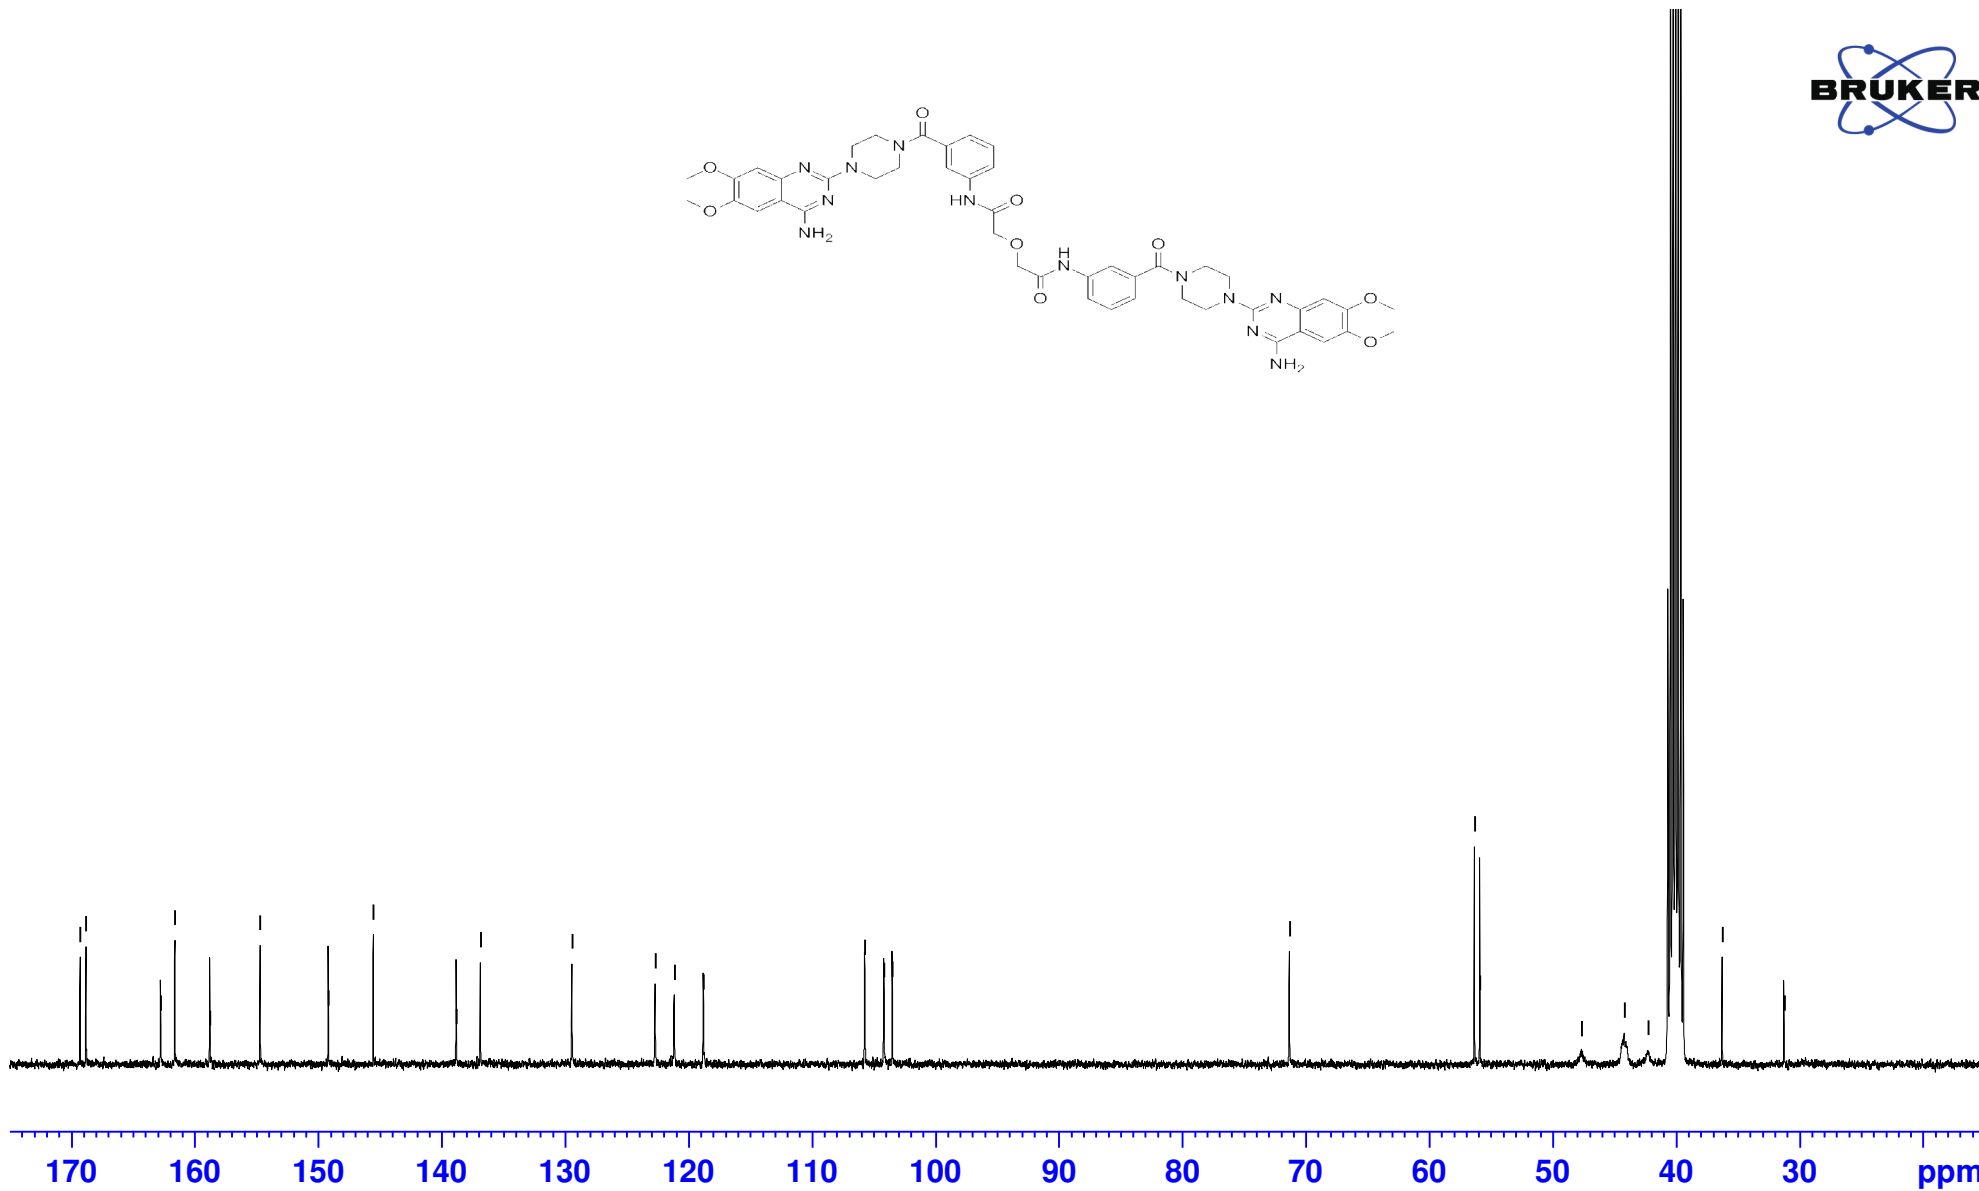

# ==== Shimadzu LabSolutions Data Report ====

Sample ID : 1                      Acquired                      1/4/2020 7:41:07 PM  
Data Filename : CF-F-09.lcd

<Chromatogram>

Segment#1

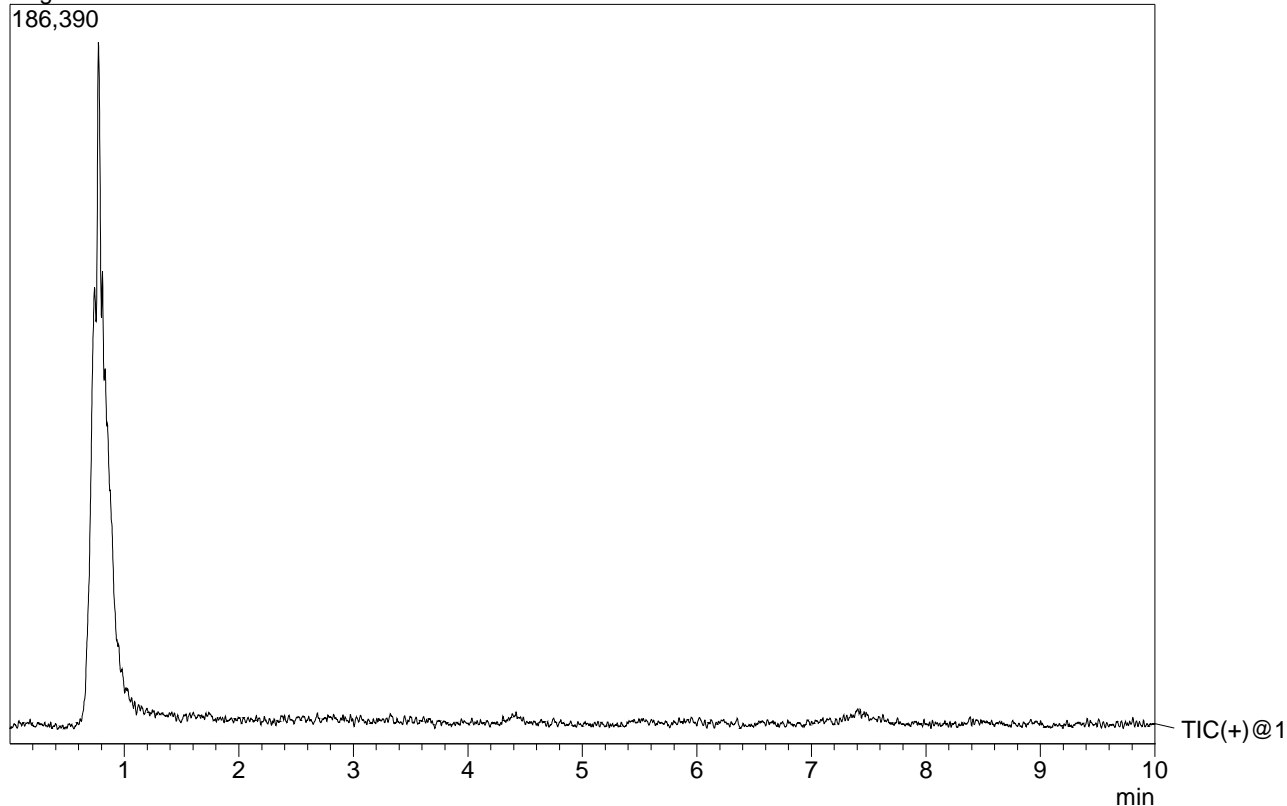

<Spectrum>

R.Time:----(Scan#:----)  
MassPeaks:526 BasePeak:915.10(29270)  
Spectrum Mode:Averaged 0.620-0.998(373-600)  
BG Mode:None Polarity:Positive Segment 1 - Event 1

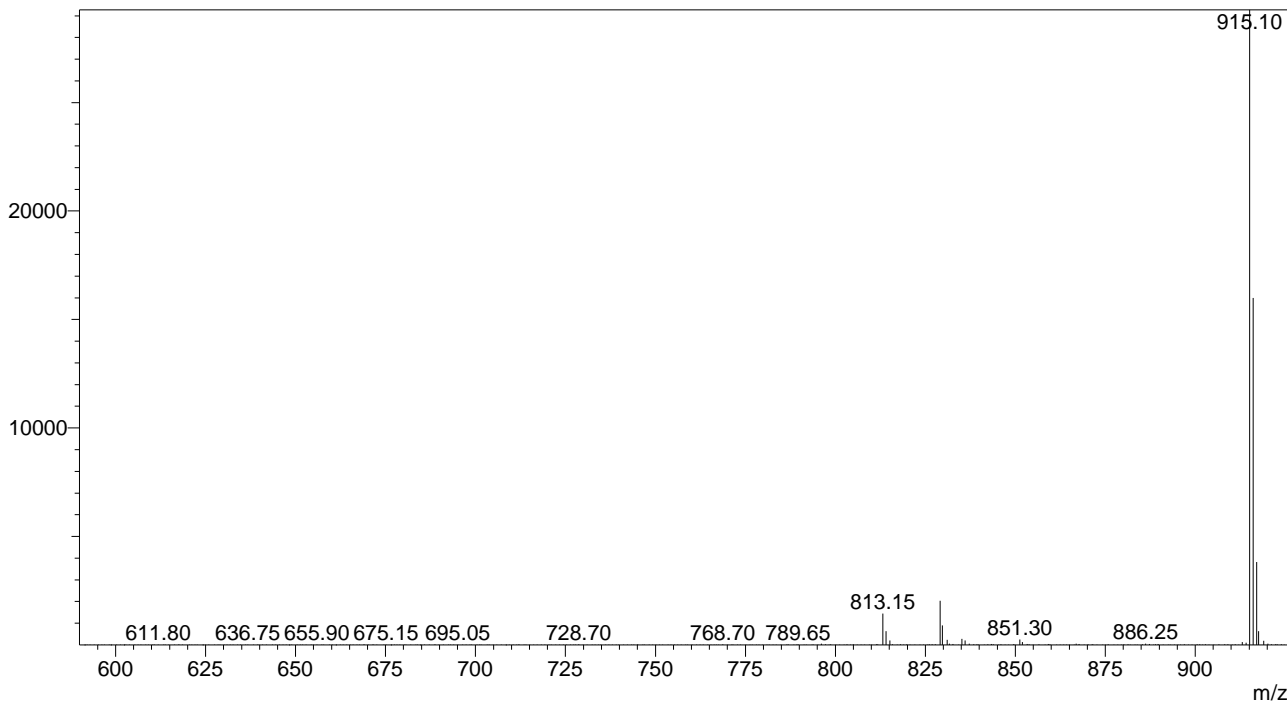



# Analysis Report

## <Sample Information>

Sample Name : CF\_09  
 Sample ID : CF\_009  
 Data Filename : CF\_Batch\_13\_6\_20\_6182020\_009.lcd  
 Method Filename : PDA\_6\_18\_20\_batch.lcm  
 Batch Filename : CF\_Batch\_13\_6\_20.lcb  
 Vial # : 1-9  
 Injection Volume : 5 uL  
 Date Acquired : 6/18/2020 11:29:11 AM  
 Date Processed : 6/27/2020 8:58:46 PM

Sample Type : Unknown  
 Acquired by : System Administrator  
 Processed by : System Administrator

## <Chromatogram>

mAU

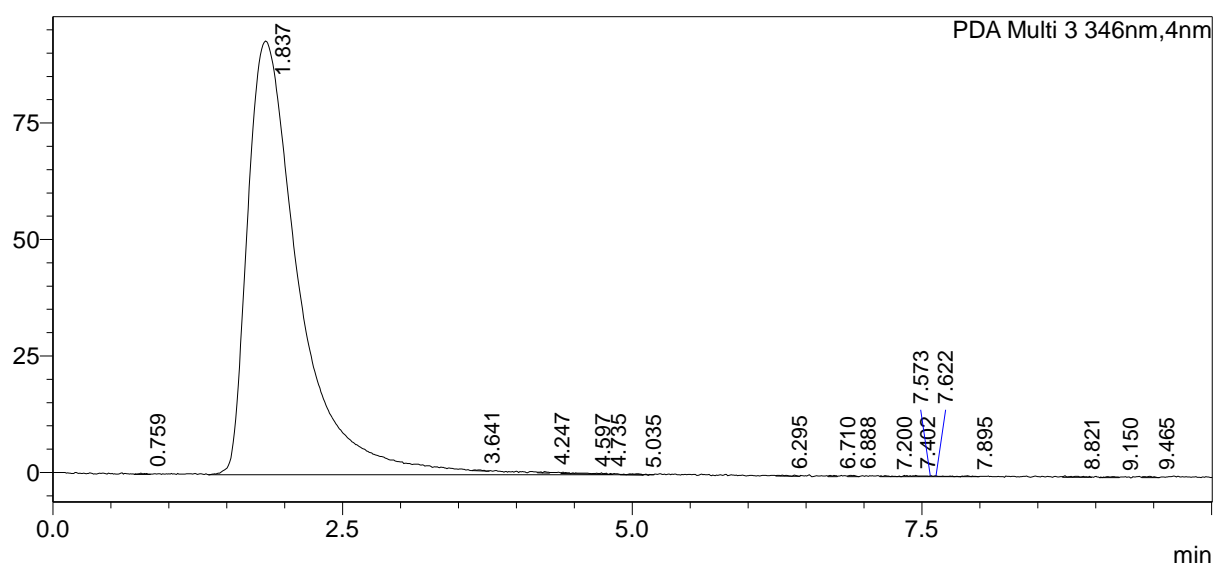

## <Peak Table>

PDA Ch3 346nm

| Peak# | Ret. Time | Area    | Height | Peak Purity Index    |
|-------|-----------|---------|--------|----------------------|
| 1     | 0.759     | 1021    | 231    | Cannot be calculated |
| 2     | 1.837     | 2897051 | 93075  | 0.970782             |
| 3     | 3.641     | 1071    | 160    | Cannot be calculated |
| 4     | 4.247     | 1065    | 292    | Cannot be calculated |
| 5     | 4.597     | 2184    | 183    | Cannot be calculated |
| 6     | 4.735     | 1594    | 283    | Cannot be calculated |
| 7     | 5.035     | 1868    | 292    | Cannot be calculated |
| 8     | 6.295     | 1460    | 217    | Cannot be calculated |
| 9     | 6.710     | 1043    | 273    | Cannot be calculated |
| 10    | 6.888     | 1201    | 314    | Cannot be calculated |
| 11    | 7.200     | 1265    | 194    | Cannot be calculated |
| 12    | 7.402     | 1838    | 235    | Cannot be calculated |
| 13    | 7.573     | 1176    | 233    | Cannot be calculated |
| 14    | 7.622     | 1477    | 212    | Cannot be calculated |
| 15    | 7.895     | 1102    | 253    | Cannot be calculated |
| 16    | 8.821     | 2350    | 221    | Cannot be calculated |
| 17    | 9.150     | 1245    | 202    | Cannot be calculated |
| 18    | 9.465     | 1171    | 244    | Cannot be calculated |
| Total |           | 2921184 | 97112  |                      |

— 9.935

7.573  
7.541  
7.434  
7.371  
7.144  
7.074  
7.057  
6.739

— 4.371

3.828  
3.791

1.053  
1.043  
1.039

7bd

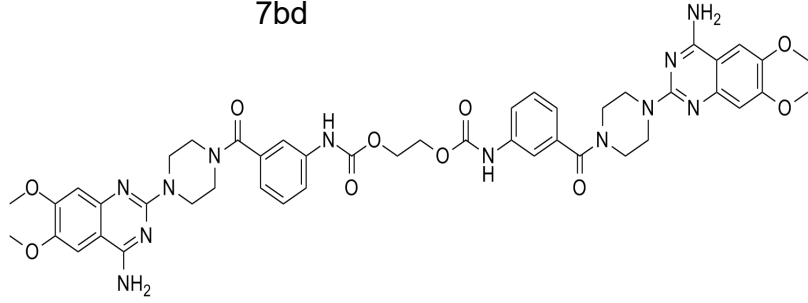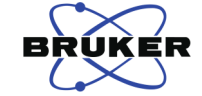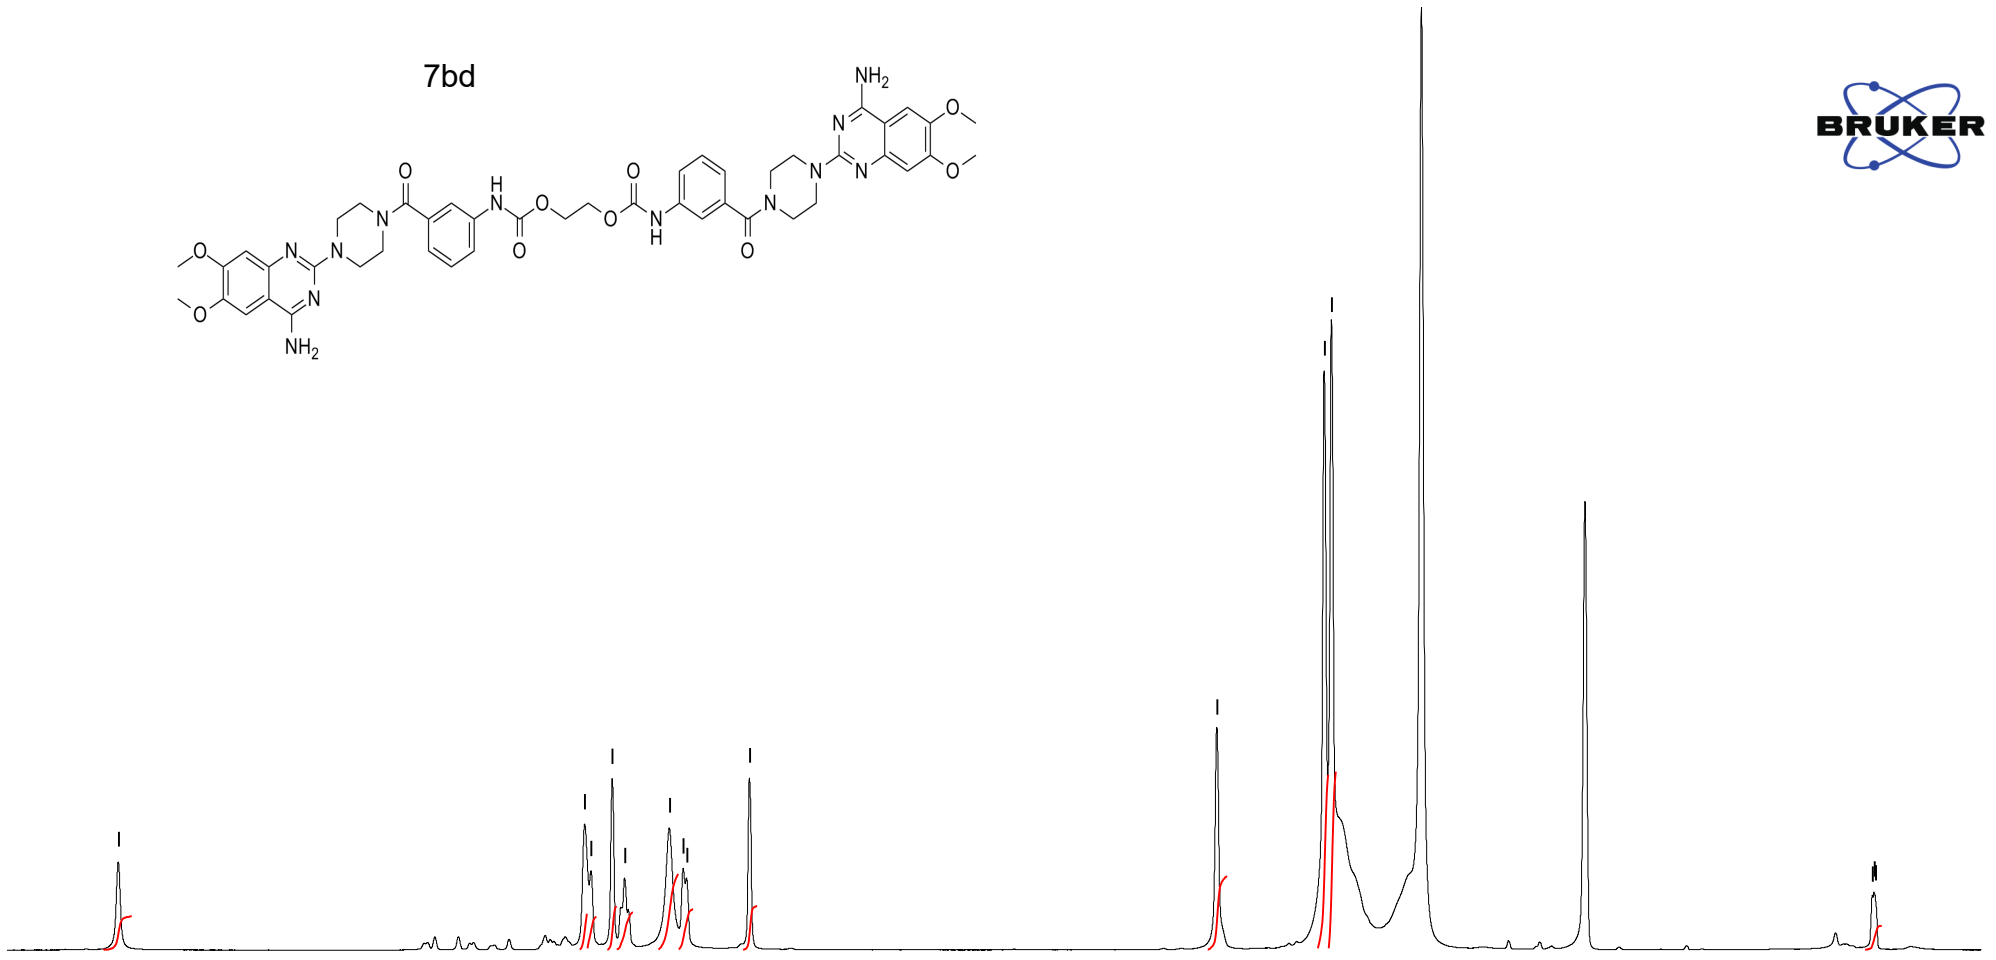

2.00

2.26  
1.98  
2.62  
2.25  
4.55  
2.43  
2.60

4.39

10.75  
10.88

1.43

10.0 9.5 9.0 8.5 8.0 7.5 7.0 6.5 6.0 5.5 5.0 4.5 4.0 3.5 3.0 2.5 2.0 1.5 ppm

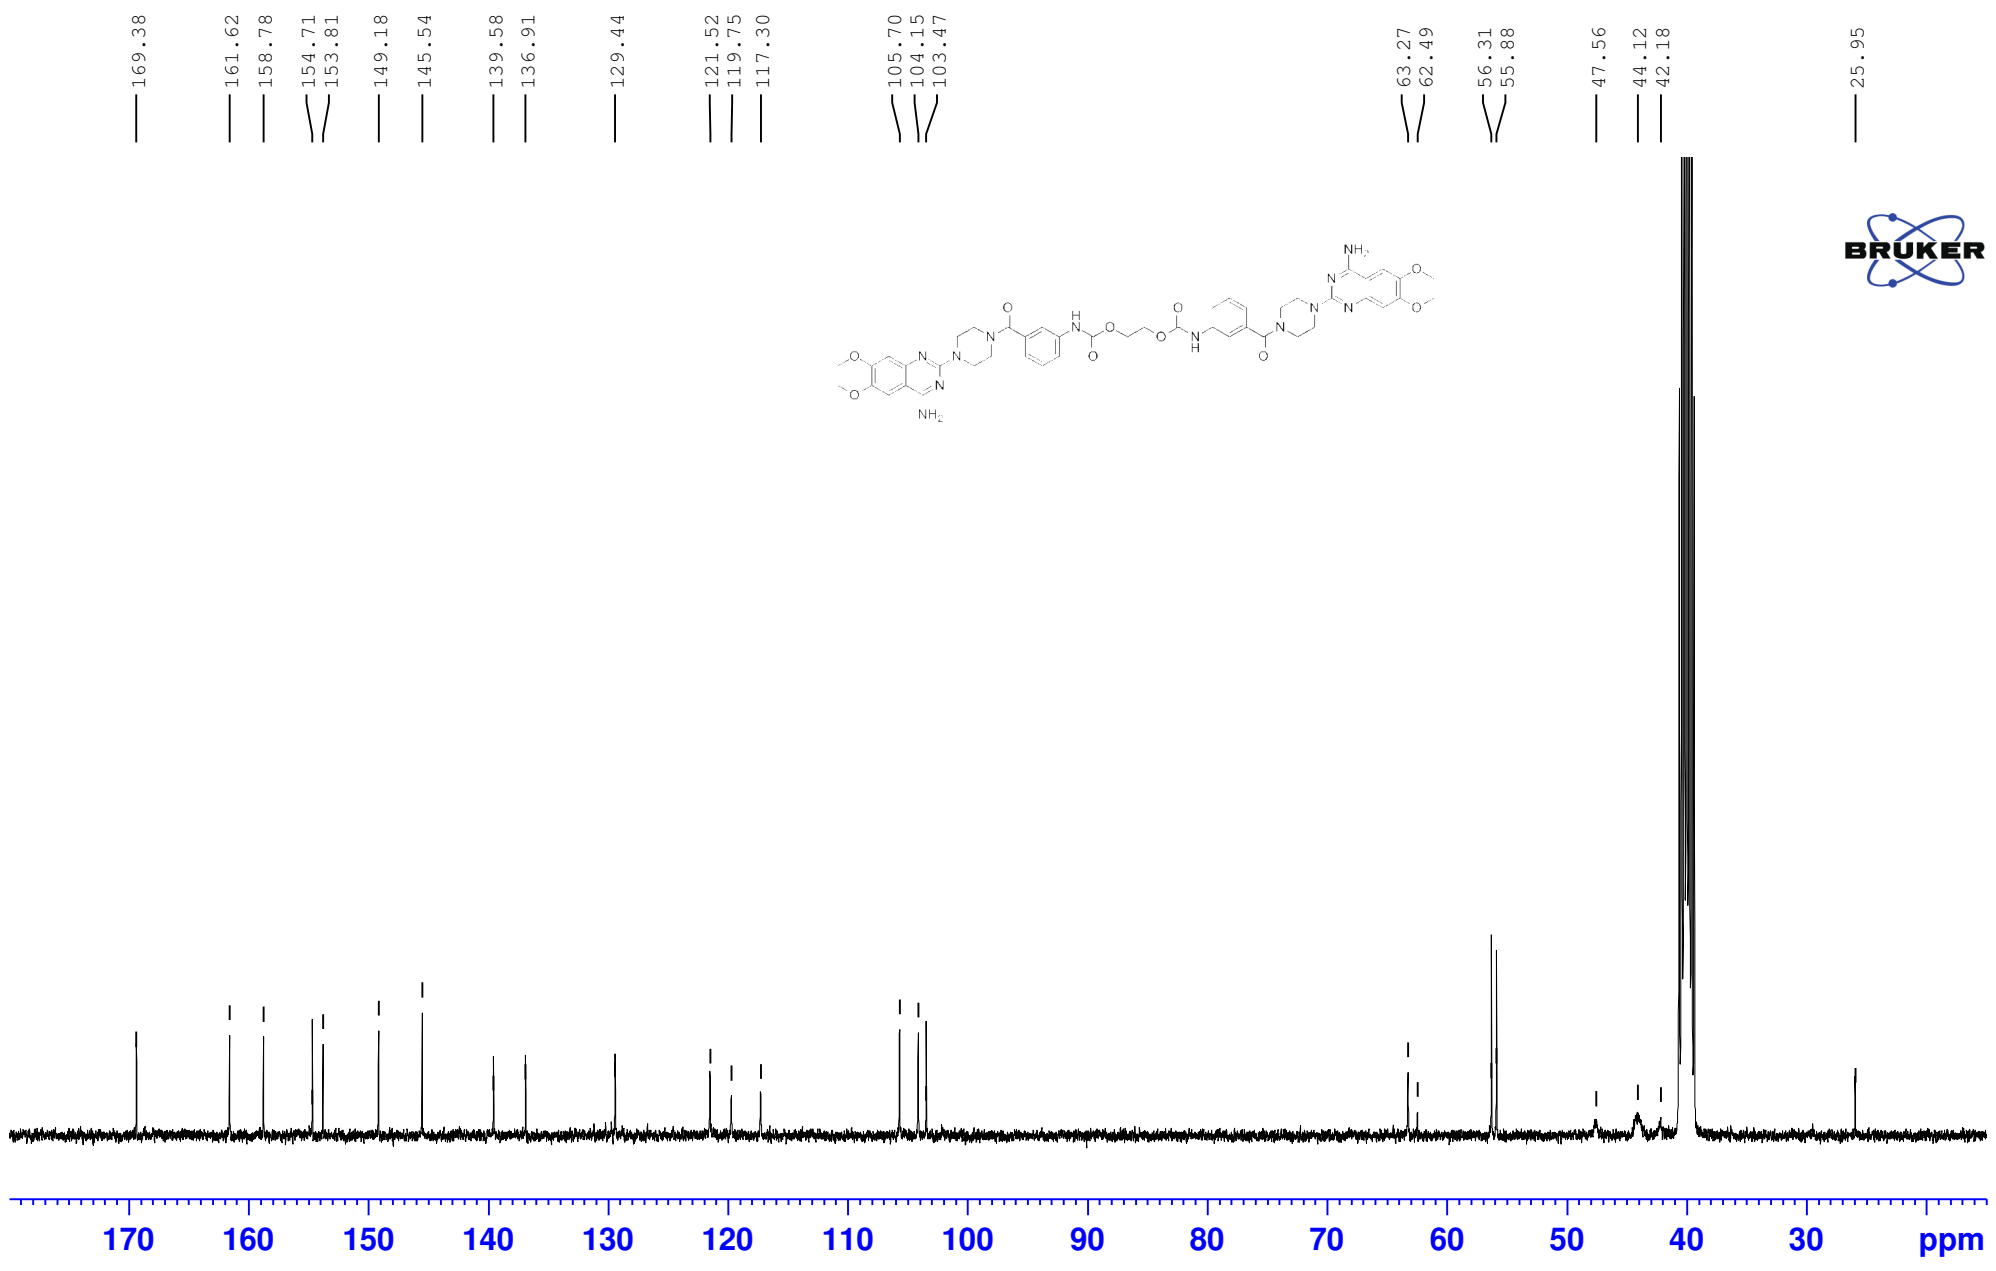

— 169.38

— 161.62

— 158.78

— 154.71

— 153.81

— 149.18

— 145.54

— 139.58

— 136.91

— 129.44

— 121.52

— 119.75

— 117.30

— 105.70

— 104.15

— 103.47

— 63.27

— 62.49

— 56.31

— 55.88

— 47.56

— 44.12

— 42.18

— 25.95

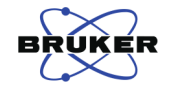

# ==== Shimadzu LabSolutions Data Report ====

Sample ID : 1                      Acquired                      1/4/2020 8:15:51 PM  
Data Filename : CF-F-12.lcd

<Chromatogram>

Segment#1

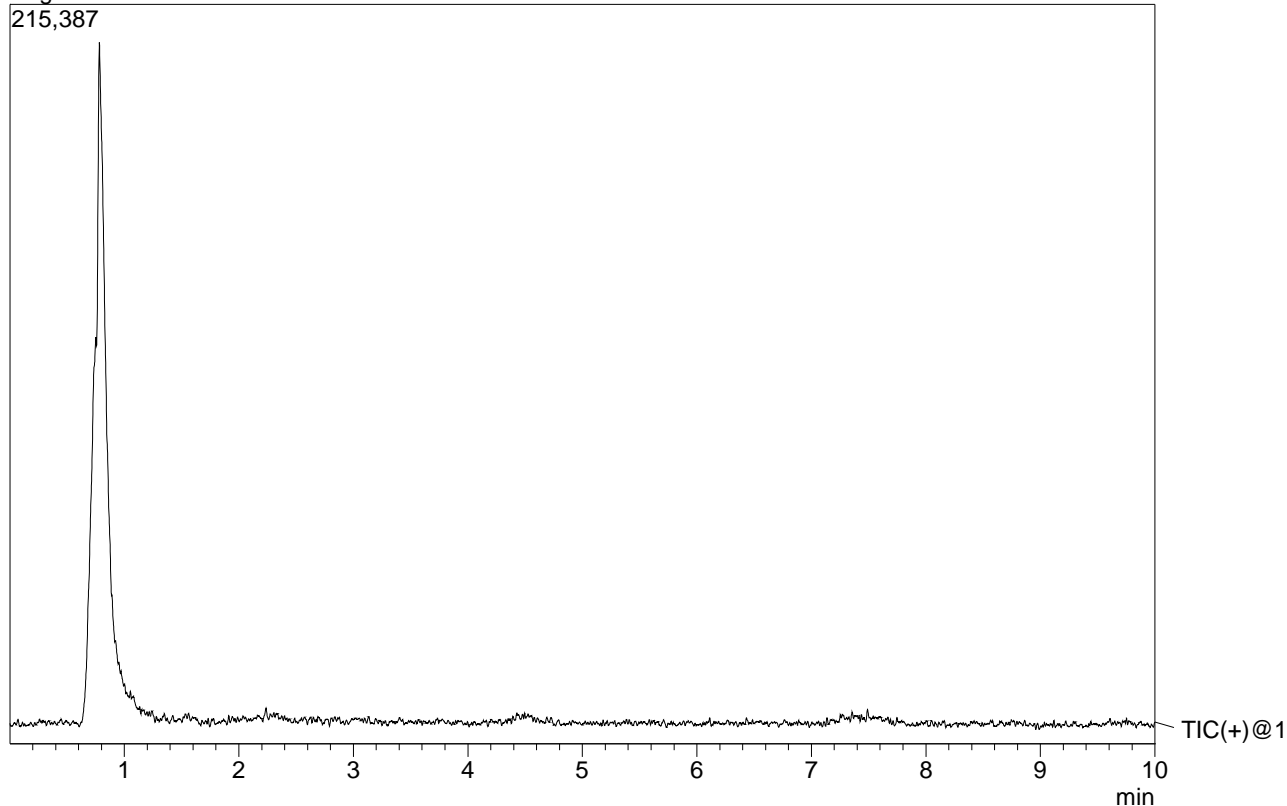

<Spectrum>

R.Time:----(Scan#:----)  
MassPeaks:501 BasePeak:931.20(26401)  
Spectrum Mode:Averaged 0.620-1.052(373-632)  
BG Mode:None Polarity:Positive Segment 1 - Event 1

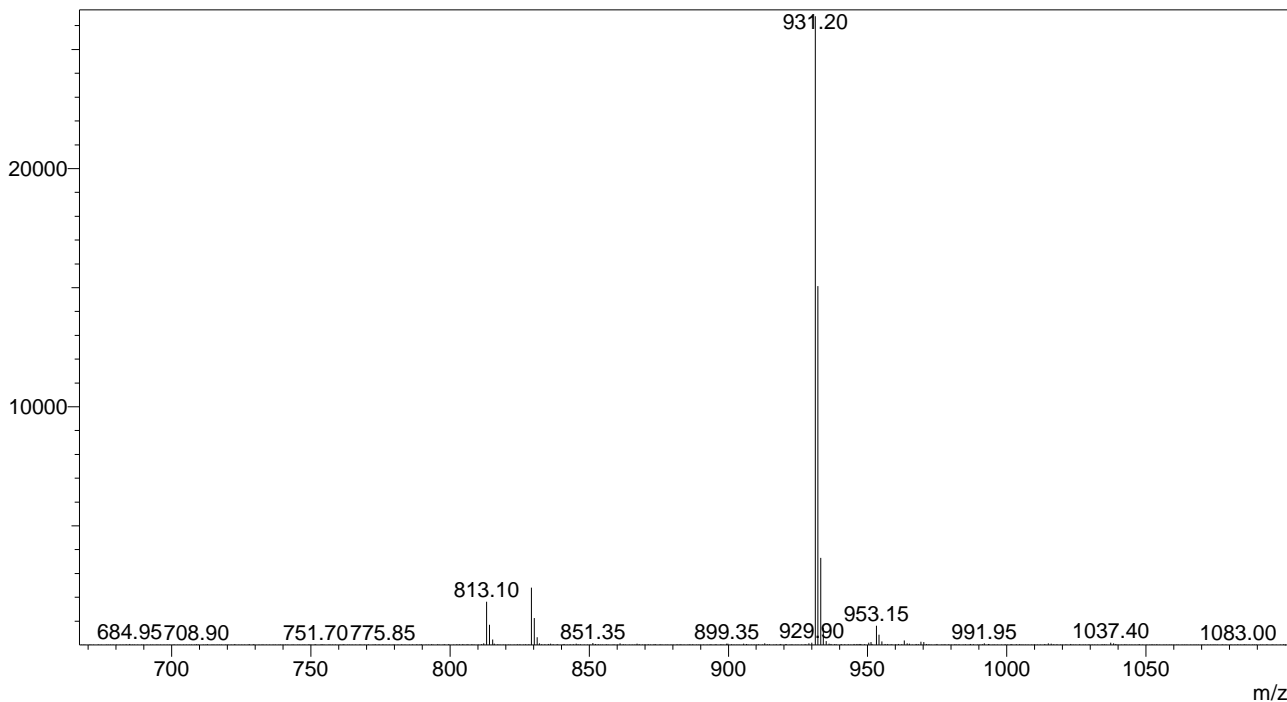



# Analysis Report

## <Sample Information>

Sample Name : CF\_12  
 Sample ID : CF\_012  
 Data Filename : CF\_Batch\_13\_6\_20\_6182020\_012.lcd  
 Method Filename : PDA\_6\_18\_20\_batch.lcm  
 Batch Filename : CF\_Batch\_13\_6\_20.lcb  
 Vial # : 1-12  
 Injection Volume : 5 uL  
 Date Acquired : 6/18/2020 12:11:11 PM  
 Date Processed : 6/18/2020 12:21:17 PM  
 Sample Type : Unknown  
 Acquired by : System Administrator  
 Processed by : System Administrator

## <Chromatogram>

mAU

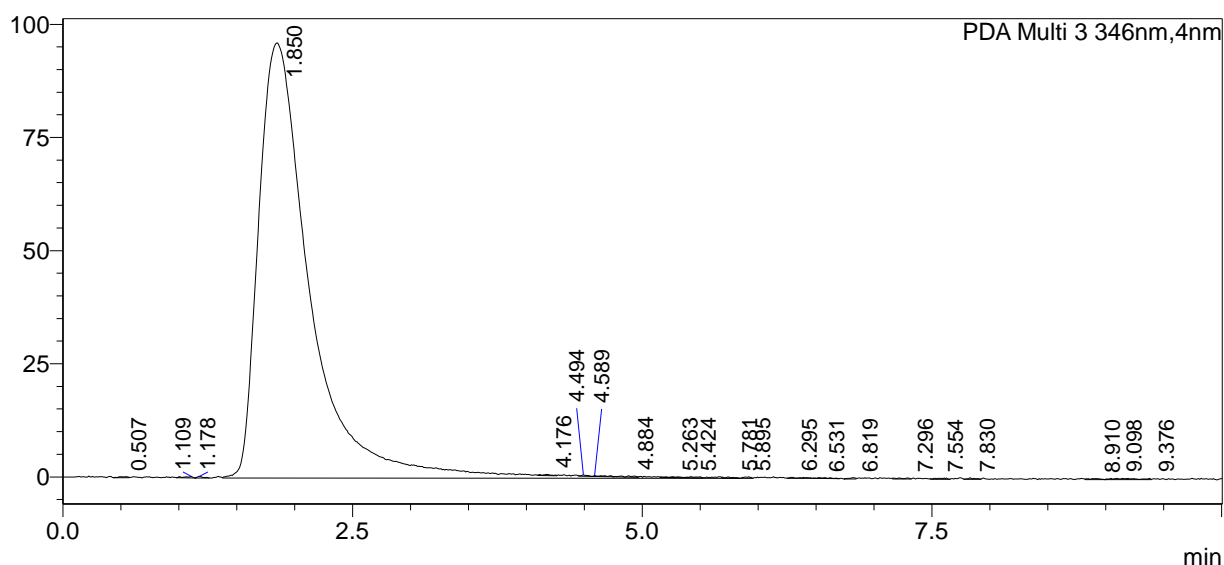

## <Peak Table>

PDA Ch3 346nm

| Peak# | Ret. Time | Area    | Height | Peak Purity Index    |
|-------|-----------|---------|--------|----------------------|
| 1     | 0.507     | 1209    | 210    | Cannot be calculated |
| 2     | 1.109     | 1570    | 329    | Cannot be calculated |
| 3     | 1.178     | 1135    | 319    | Cannot be calculated |
| 4     | 1.850     | 2966585 | 96081  | 0.972300             |
| 5     | 4.176     | 1194    | 230    | Cannot be calculated |
| 6     | 4.494     | 1043    | 292    | Cannot be calculated |
| 7     | 4.589     | 1401    | 197    | Cannot be calculated |
| 8     | 4.884     | 1718    | 274    | Cannot be calculated |
| 9     | 5.263     | 1502    | 205    | Cannot be calculated |
| 10    | 5.424     | 1454    | 215    | Cannot be calculated |
| 11    | 5.781     | 1151    | 166    | Cannot be calculated |
| 12    | 5.895     | 1246    | 249    | Cannot be calculated |
| 13    | 6.295     | 1599    | 212    | Cannot be calculated |
| 14    | 6.531     | 1222    | 199    | Cannot be calculated |
| 15    | 6.819     | 1019    | 285    | Cannot be calculated |
| 16    | 7.296     | 1597    | 250    | Cannot be calculated |
| 17    | 7.554     | 1568    | 222    | Cannot be calculated |
| 18    | 7.830     | 1247    | 319    | Cannot be calculated |
| 19    | 8.910     | 1344    | 218    | Cannot be calculated |
| 20    | 9.098     | 1982    | 253    | Cannot be calculated |
| 21    | 9.376     | 1689    | 258    | Cannot be calculated |
| Total |           | 2994477 | 100983 |                      |





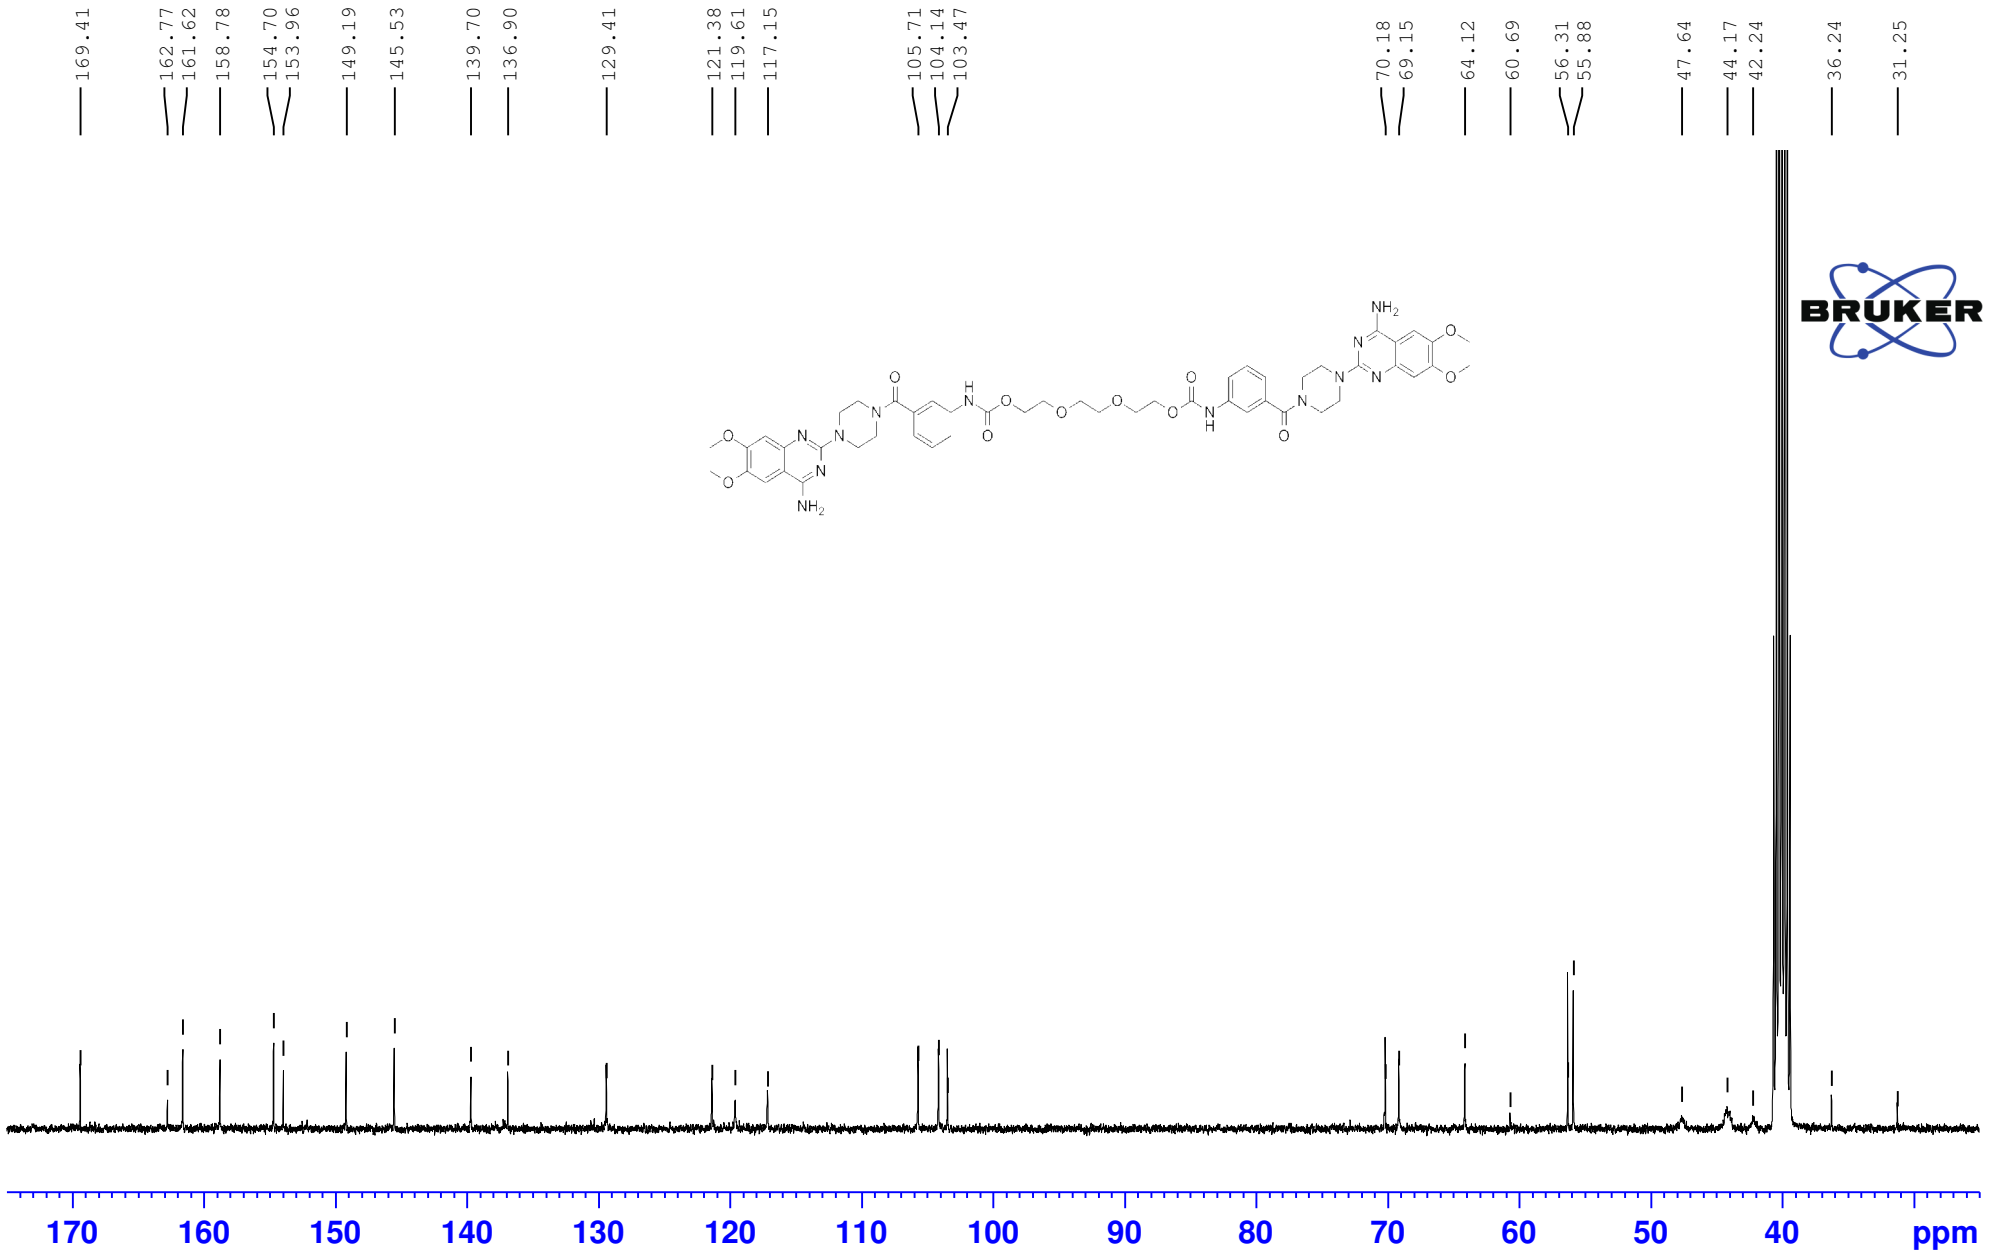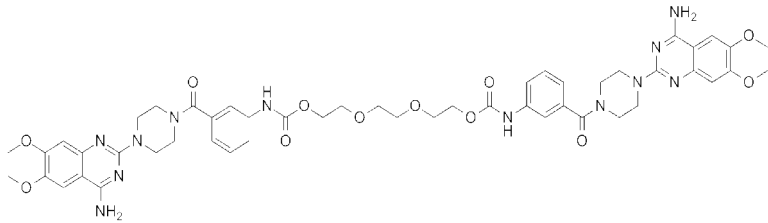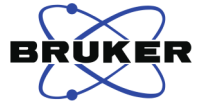

# ==== Shimadzu LabSolutions Data Report ====

Sample ID : 1                      Acquired                      1/4/2020 8:05:05 PM  
Data Filename : CF-F-13.lcd

<Chromatogram>

Segment#1

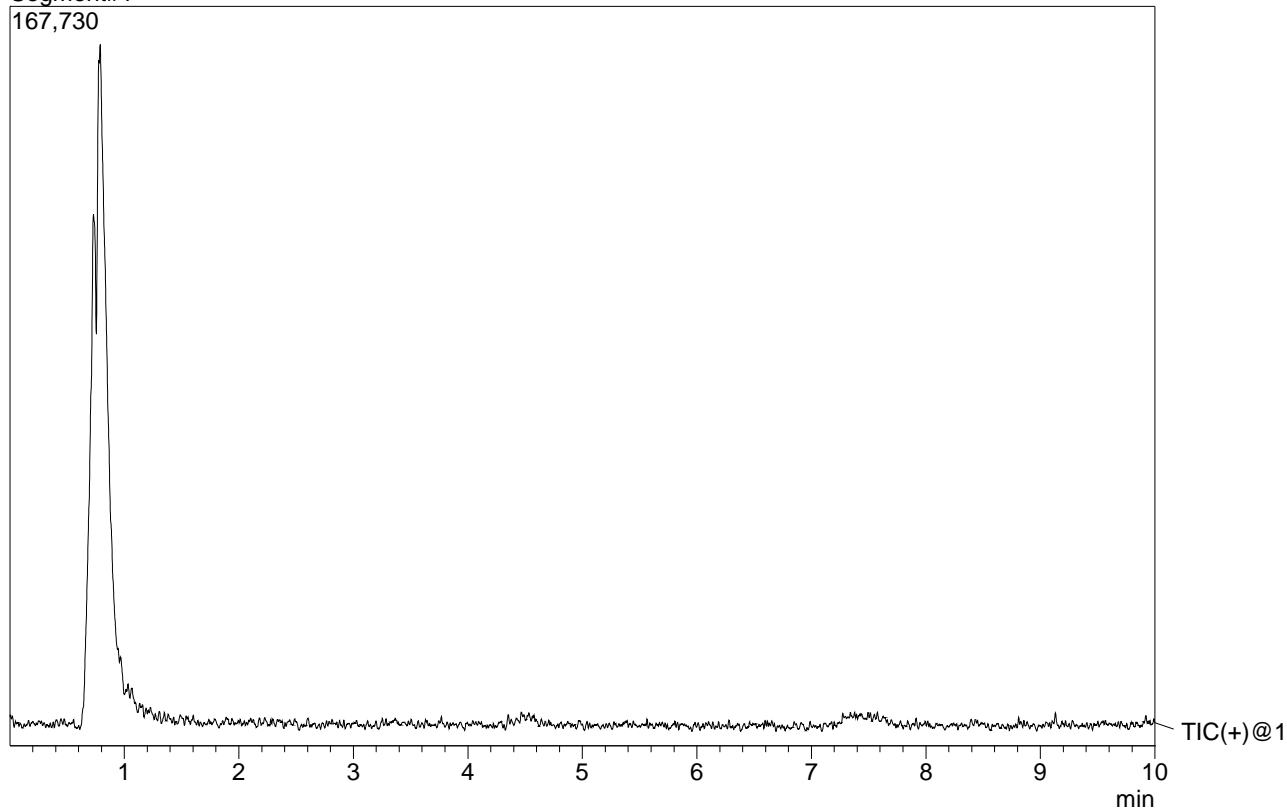

<Spectrum>

R.Time:----(Scan#:----)  
MassPeaks:501 BasePeak:1019.20(26901)  
Spectrum Mode:Averaged 0.612-0.980(368-589)  
BG Mode:None Polarity:Positive Segment 1 - Event 1

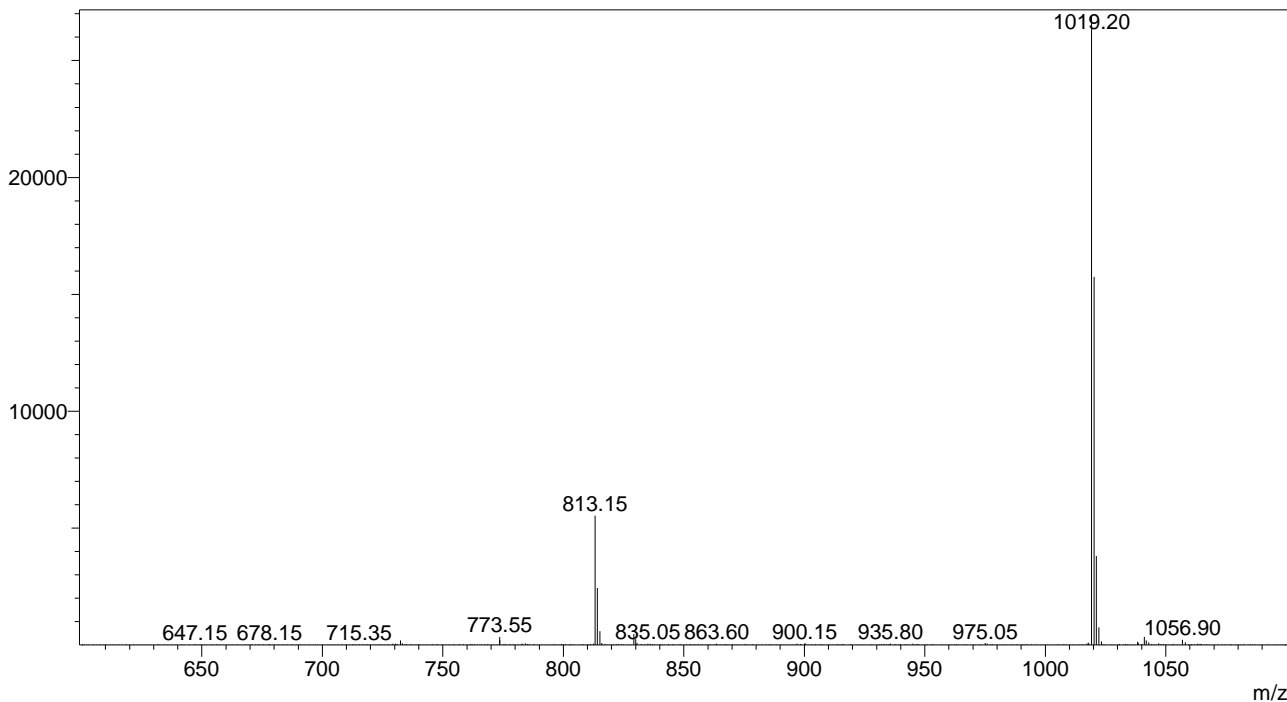



# Analysis Report

## <Sample Information>

Sample Name : CF\_13  
 Sample ID : CF\_013  
 Data Filename : CF\_Batch\_13\_6\_20\_6182020\_013.lcd  
 Method Filename : PDA\_6\_18\_20\_batch.lcm  
 Batch Filename : CF\_Batch\_13\_6\_20.lcb  
 Vial # : 1-13  
 Injection Volume : 5 uL  
 Date Acquired : 6/18/2020 12:21:40 PM  
 Date Processed : 6/18/2020 12:31:46 PM

Sample Type : Unknown  
 Acquired by : System Administrator  
 Processed by : System Administrator

## <Chromatogram>

mAU

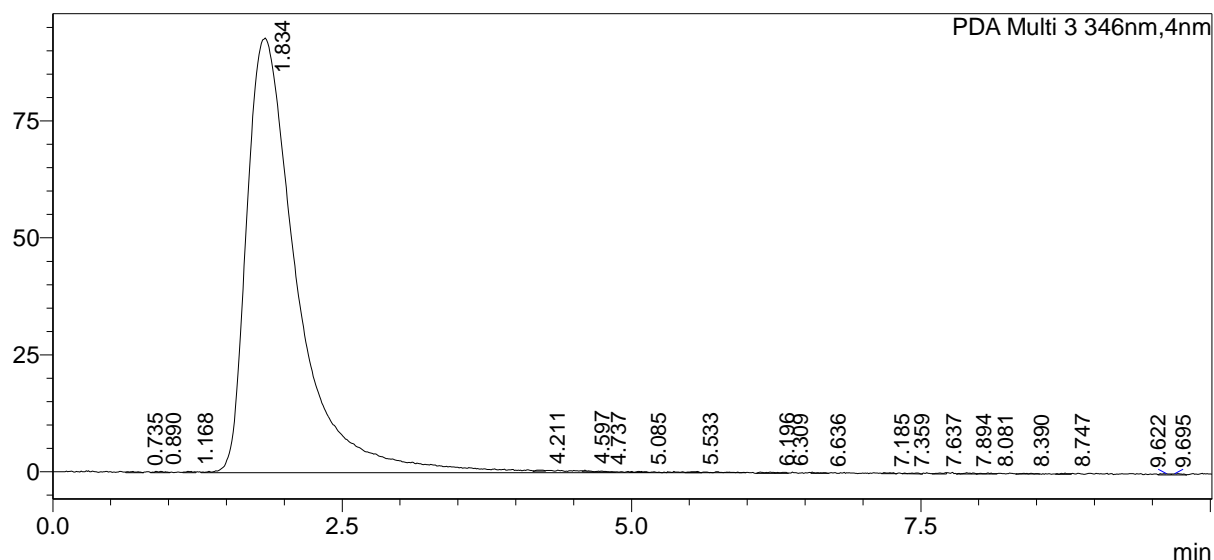

## <Peak Table>

PDA Ch3 346nm

| Peak# | Ret. Time | Area    | Height | Peak Purity Index    |
|-------|-----------|---------|--------|----------------------|
| 1     | 0.735     | 1169    | 163    | Cannot be calculated |
| 2     | 0.890     | 1661    | 273    | Cannot be calculated |
| 3     | 1.168     | 1216    | 272    | Cannot be calculated |
| 4     | 1.834     | 2817642 | 92966  | 0.981478             |
| 5     | 4.211     | 1012    | 221    | Cannot be calculated |
| 6     | 4.597     | 1009    | 375    | Cannot be calculated |
| 7     | 4.737     | 1107    | 208    | Cannot be calculated |
| 8     | 5.085     | 1261    | 206    | Cannot be calculated |
| 9     | 5.533     | 1165    | 183    | Cannot be calculated |
| 10    | 6.196     | 1700    | 251    | Cannot be calculated |
| 11    | 6.309     | 1109    | 222    | Cannot be calculated |
| 12    | 6.636     | 1276    | 195    | Cannot be calculated |
| 13    | 7.185     | 1016    | 186    | Cannot be calculated |
| 14    | 7.359     | 1124    | 132    | Cannot be calculated |
| 15    | 7.637     | 1327    | 180    | Cannot be calculated |
| 16    | 7.894     | 1396    | 288    | Cannot be calculated |
| 17    | 8.081     | 1220    | 214    | Cannot be calculated |
| 18    | 8.390     | 1146    | 166    | Cannot be calculated |
| 19    | 8.747     | 1031    | 251    | Cannot be calculated |
| 20    | 9.622     | 1382    | 258    | Cannot be calculated |
| 21    | 9.695     | 1339    | 270    | Cannot be calculated |
| Total |           | 2842309 | 97480  |                      |

10.322

7.970  
7.684  
7.664  
7.435  
7.410  
7.389  
7.178  
6.740

4.327

3.827  
3.715

3.237

7ec

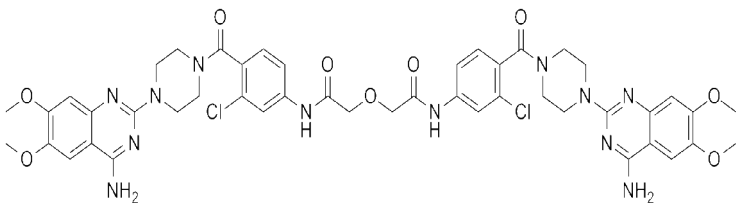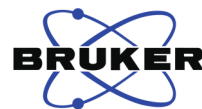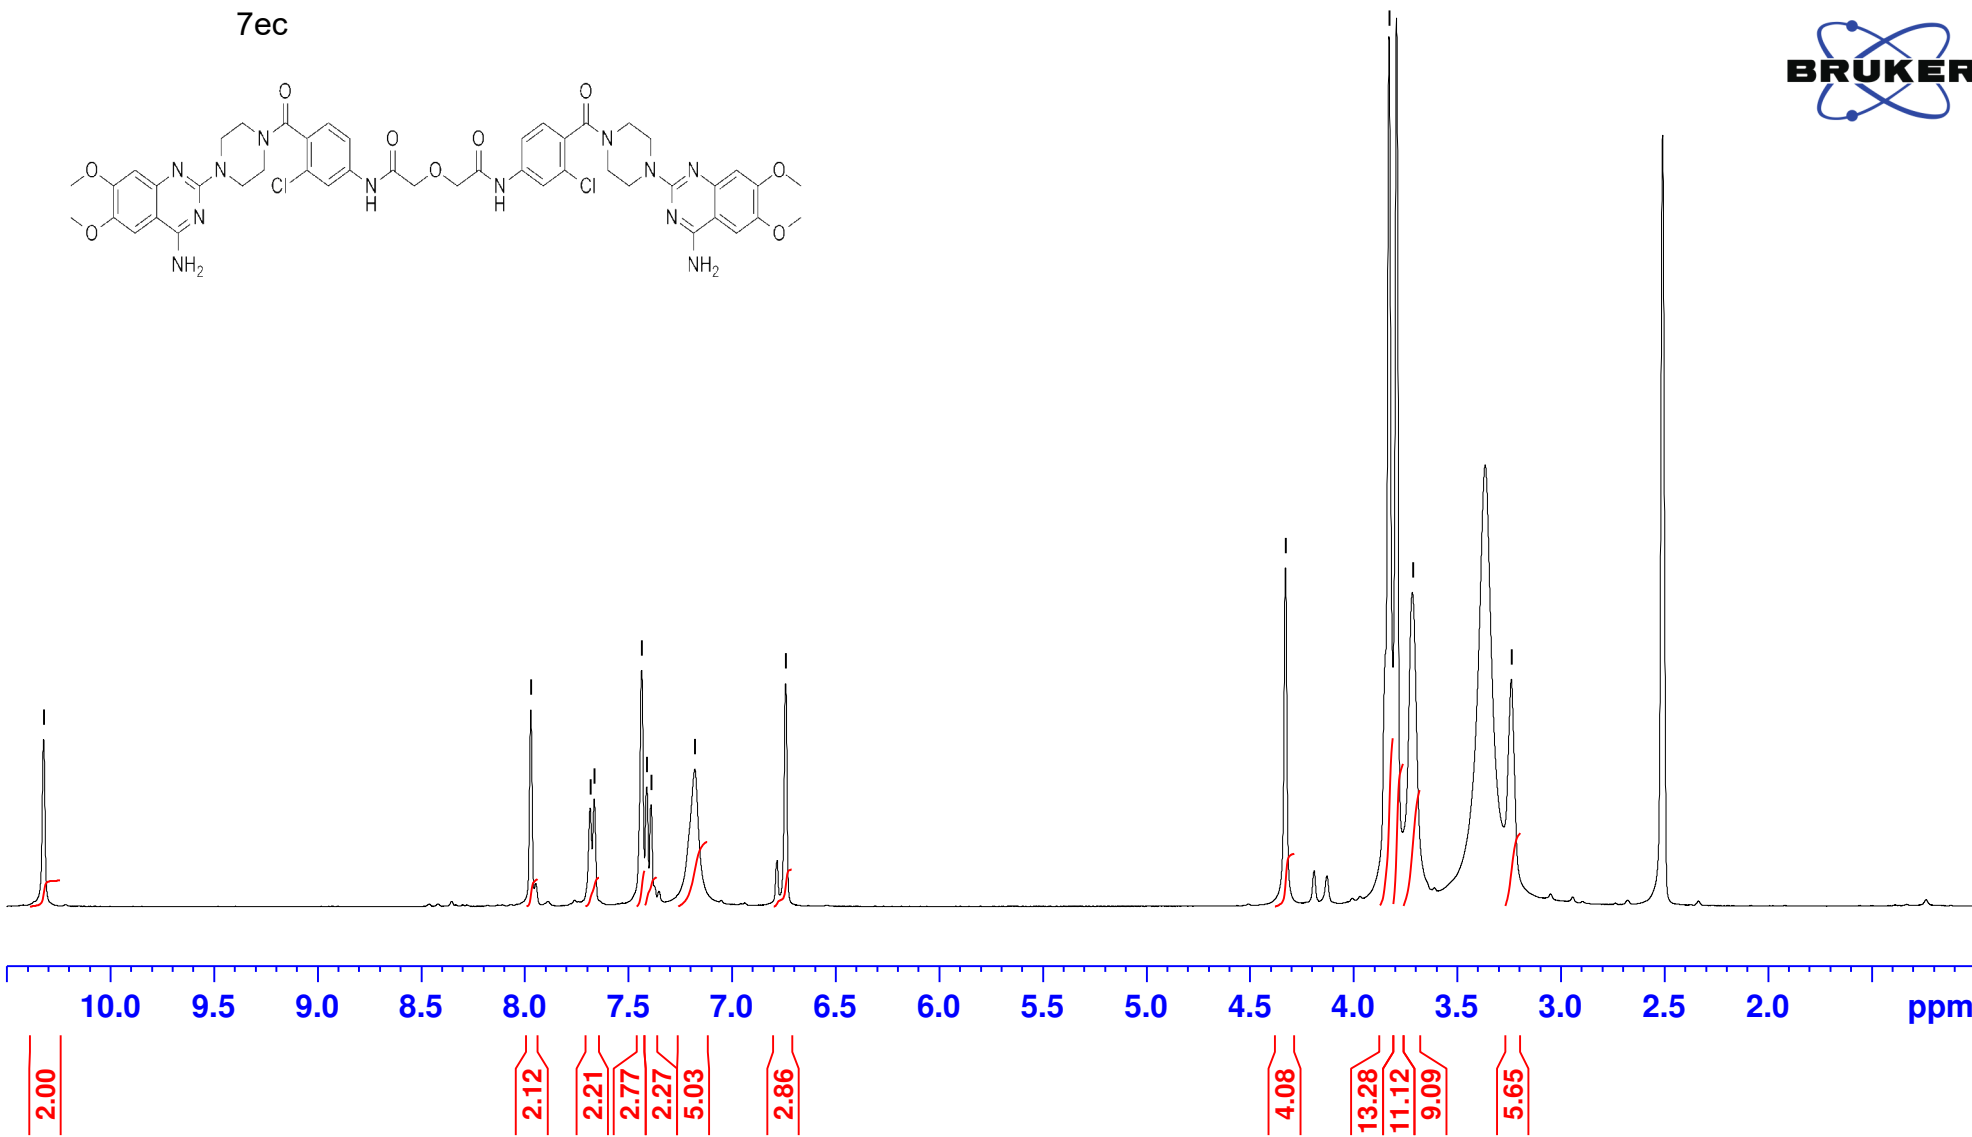

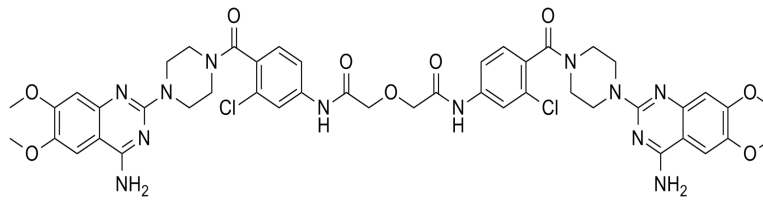

- 169.09
- 166.09
- 161.63
- 158.64
- 154.74
- 148.97
- 145.60
- 145.48
- 140.35
- 131.20
- 129.89
- 129.02
- 120.15
- 118.86
- 105.61
- 105.42
- 104.27
- 104.16
- 103.48
- 103.35
- 71.13
- 56.32
- 55.90
- 46.78
- 44.31
- 44.16
- 43.88
- 41.79

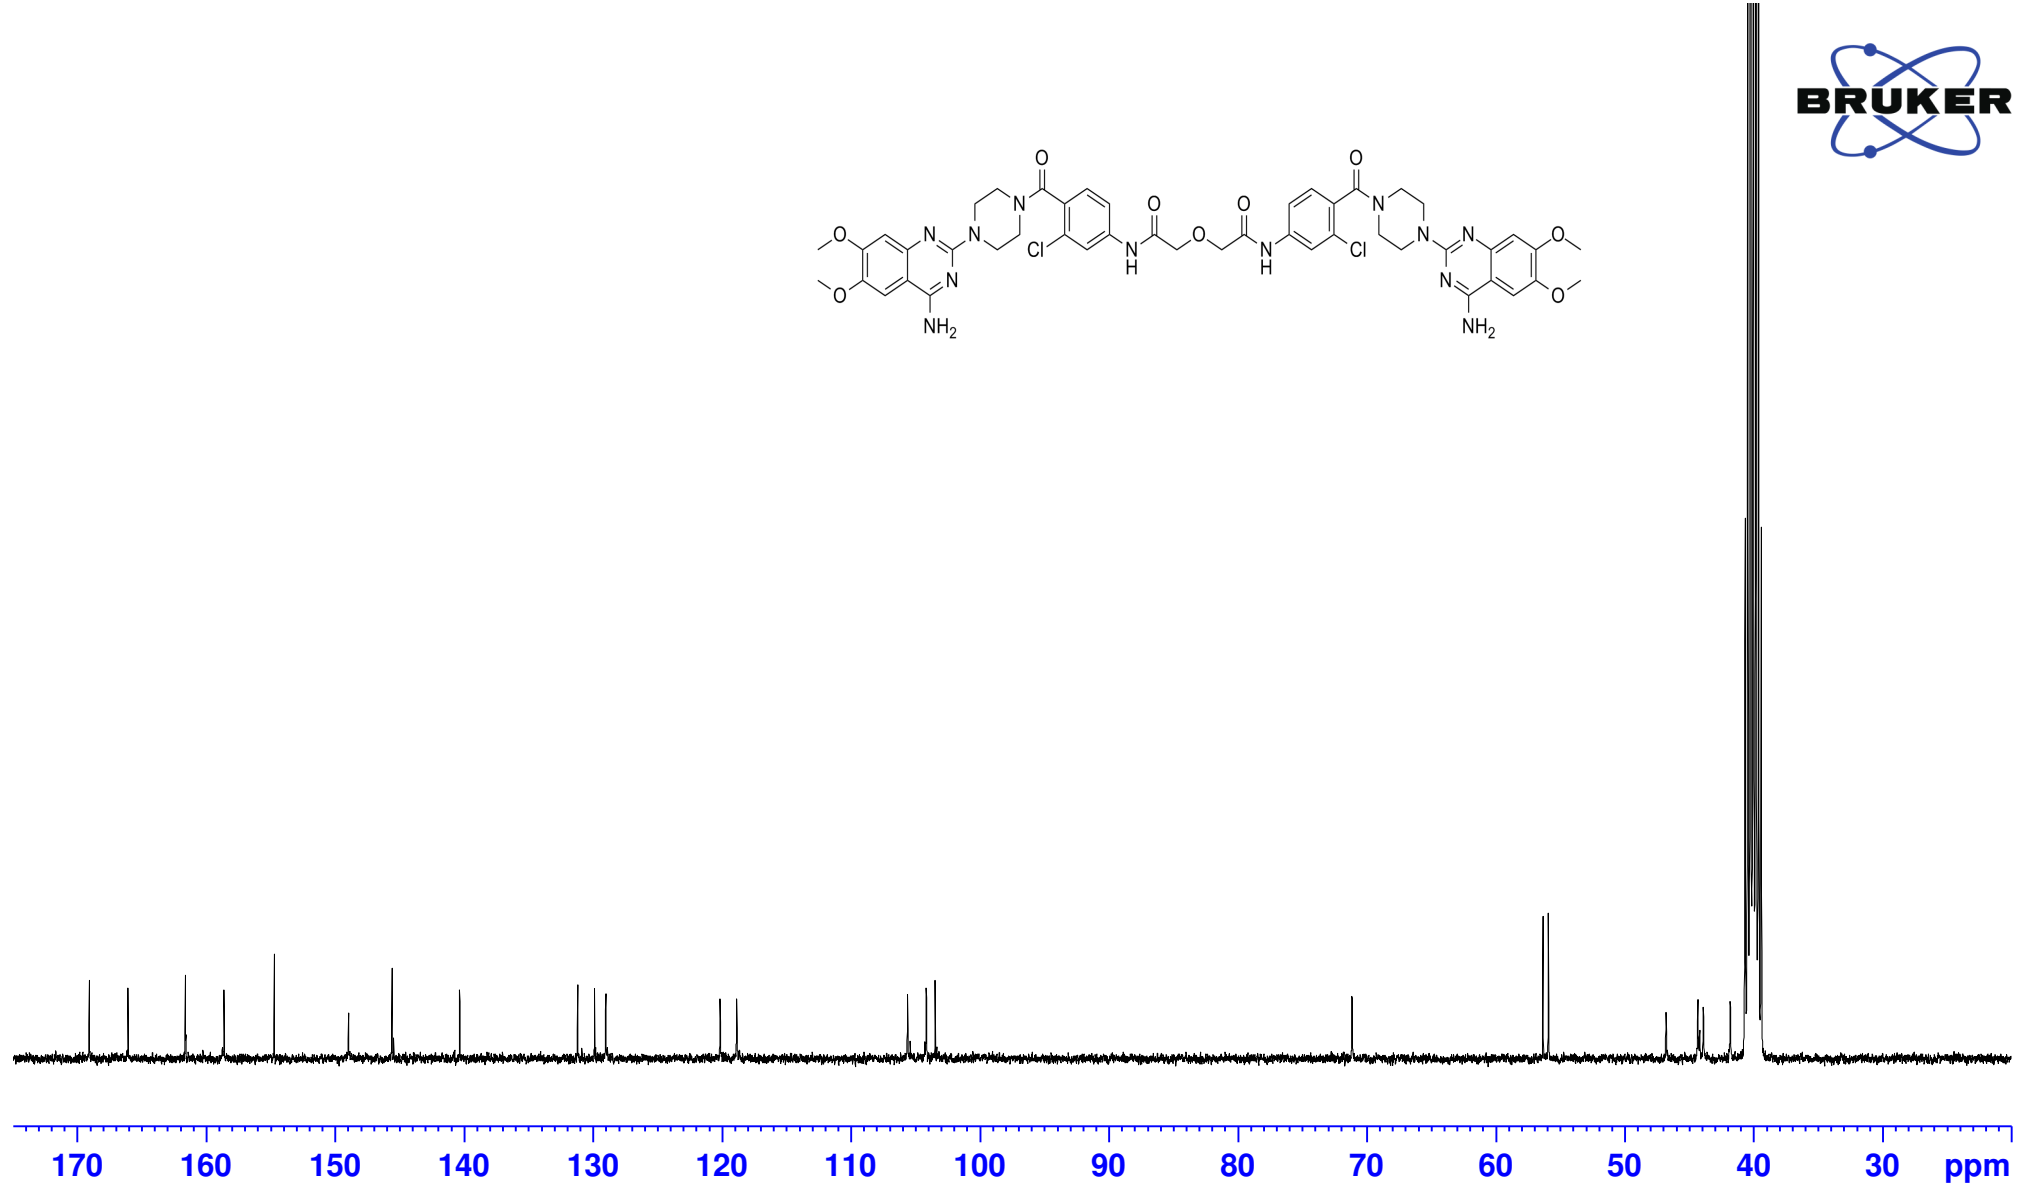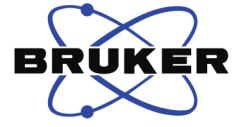

## ==== Shimadzu LabSolutions Data Report ====

Sample ID : 1 Acquired 1/4/2020 8:51:45 PM  
Data Filename : CF-F-27.lcd

<Chromatogram>

Segment#1

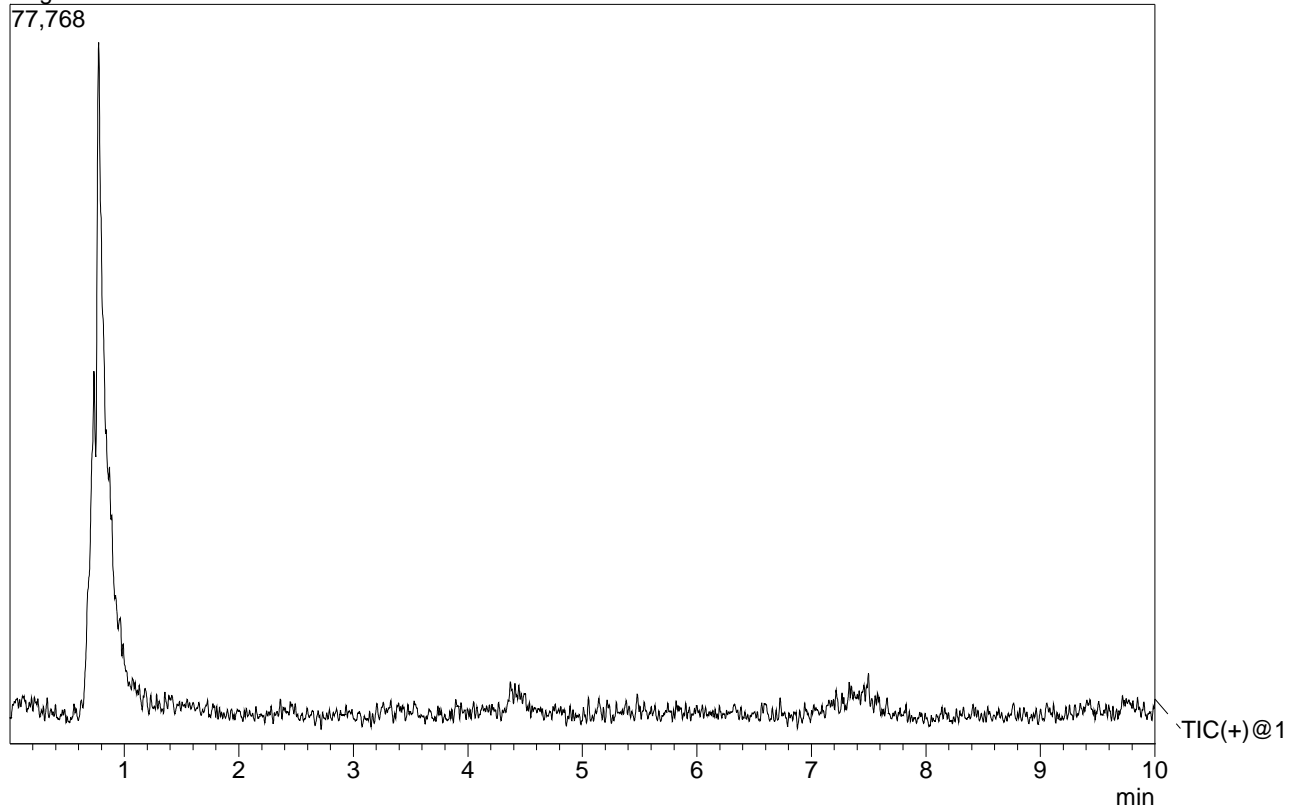

<Spectrum>

R.Time:----(Scan#----)  
MassPeaks:501 BasePeak:983.10(6068)  
Spectrum Mode:Averaged 0.593-1.043(357-627)  
BG Mode:None Polarity:Positive Segment 1 - Event 1

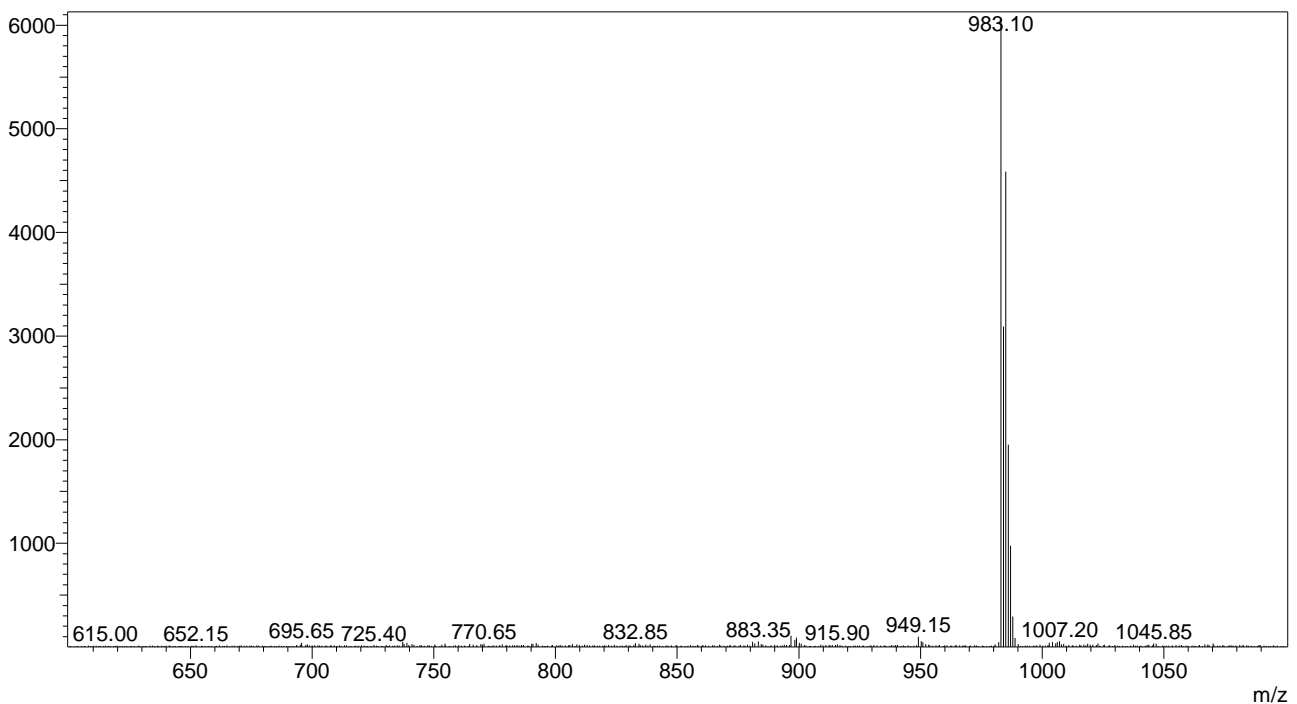

# Analysis Report

## <Sample Information>

Sample Name : CF\_27  
 Sample ID : CF\_027  
 Data Filename : CF\_Batch\_13\_6\_20\_6182020\_027.lcd  
 Method Filename : PDA\_6\_18\_20\_batch.lcm  
 Batch Filename : CF\_Batch\_13\_6\_20.lcb  
 Vial # : 1-26  
 Injection Volume : 5 uL  
 Date Acquired : 6/18/2020 3:09:36 PM  
 Date Processed : 6/18/2020 3:19:42 PM  
 Sample Type : Unknown  
 Acquired by : System Administrator  
 Processed by : System Administrator

## <Chromatogram>

mAU

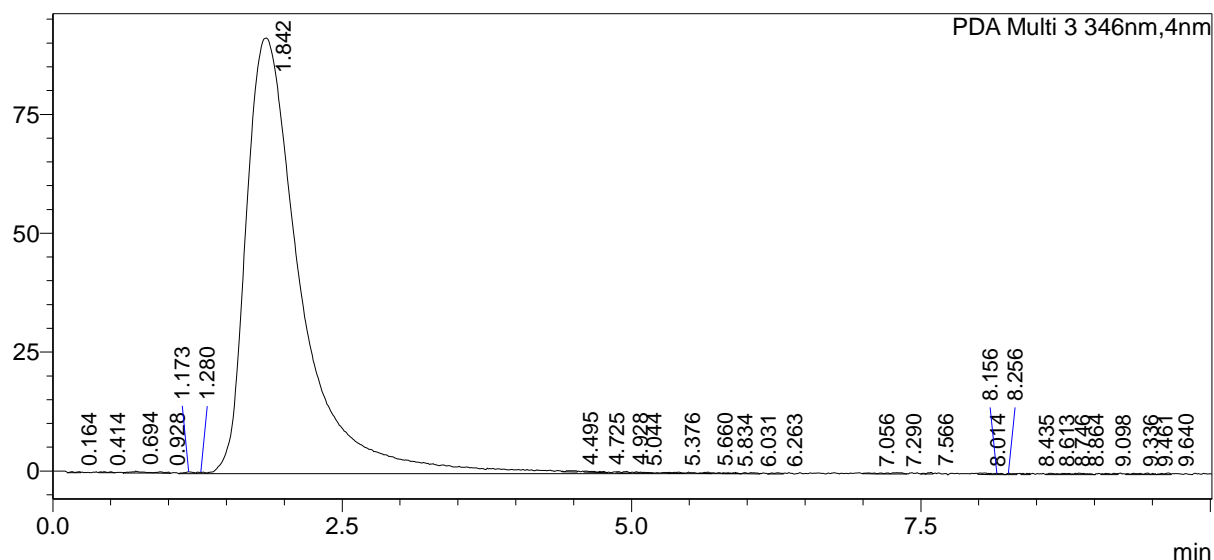

## <Peak Table>

PDA Ch3 346nm

| Peak# | Ret. Time | Area    | Height | Peak Purity Index    |
|-------|-----------|---------|--------|----------------------|
| 1     | 0.164     | 1096    | 235    | Cannot be calculated |
| 2     | 0.414     | 1241    | 261    | Cannot be calculated |
| 3     | 0.694     | 2670    | 249    | Cannot be calculated |
| 4     | 0.928     | 1385    | 320    | Cannot be calculated |
| 5     | 1.173     | 1873    | 384    | Cannot be calculated |
| 6     | 1.280     | 1388    | 272    | Cannot be calculated |
| 7     | 1.842     | 3007859 | 91577  | 0.980121             |
| 8     | 4.495     | 1543    | 278    | Cannot be calculated |
| 9     | 4.725     | 2211    | 238    | Cannot be calculated |
| 10    | 4.928     | 1337    | 239    | Cannot be calculated |
| 11    | 5.044     | 1360    | 275    | Cannot be calculated |
| 12    | 5.376     | 1509    | 223    | Cannot be calculated |
| 13    | 5.660     | 1251    | 311    | Cannot be calculated |
| 14    | 5.834     | 1510    | 243    | Cannot be calculated |
| 15    | 6.031     | 1674    | 259    | Cannot be calculated |
| 16    | 6.263     | 1239    | 273    | Cannot be calculated |
| 17    | 7.056     | 1015    | 183    | Cannot be calculated |
| 18    | 7.290     | 2507    | 255    | Cannot be calculated |
| 19    | 7.566     | 1154    | 256    | Cannot be calculated |
| 20    | 8.014     | 1486    | 276    | Cannot be calculated |
| 21    | 8.156     | 1469    | 282    | Cannot be calculated |
| 22    | 8.256     | 1317    | 310    | Cannot be calculated |

| Peak# | Ret. Time | Area    | Height | Peak Purity Index    |
|-------|-----------|---------|--------|----------------------|
| 23    | 8.435     | 1121    | 304    | Cannot be calculated |
| 24    | 8.613     | 1529    | 266    | Cannot be calculated |
| 25    | 8.746     | 1348    | 265    | Cannot be calculated |
| 26    | 8.864     | 2220    | 359    | Cannot be calculated |
| 27    | 9.098     | 1816    | 286    | Cannot be calculated |
| 28    | 9.336     | 1847    | 270    | Cannot be calculated |
| 29    | 9.461     | 1377    | 351    | Cannot be calculated |
| 30    | 9.640     | 1575    | 343    | Cannot be calculated |
| Total |           | 3052926 | 99643  |                      |



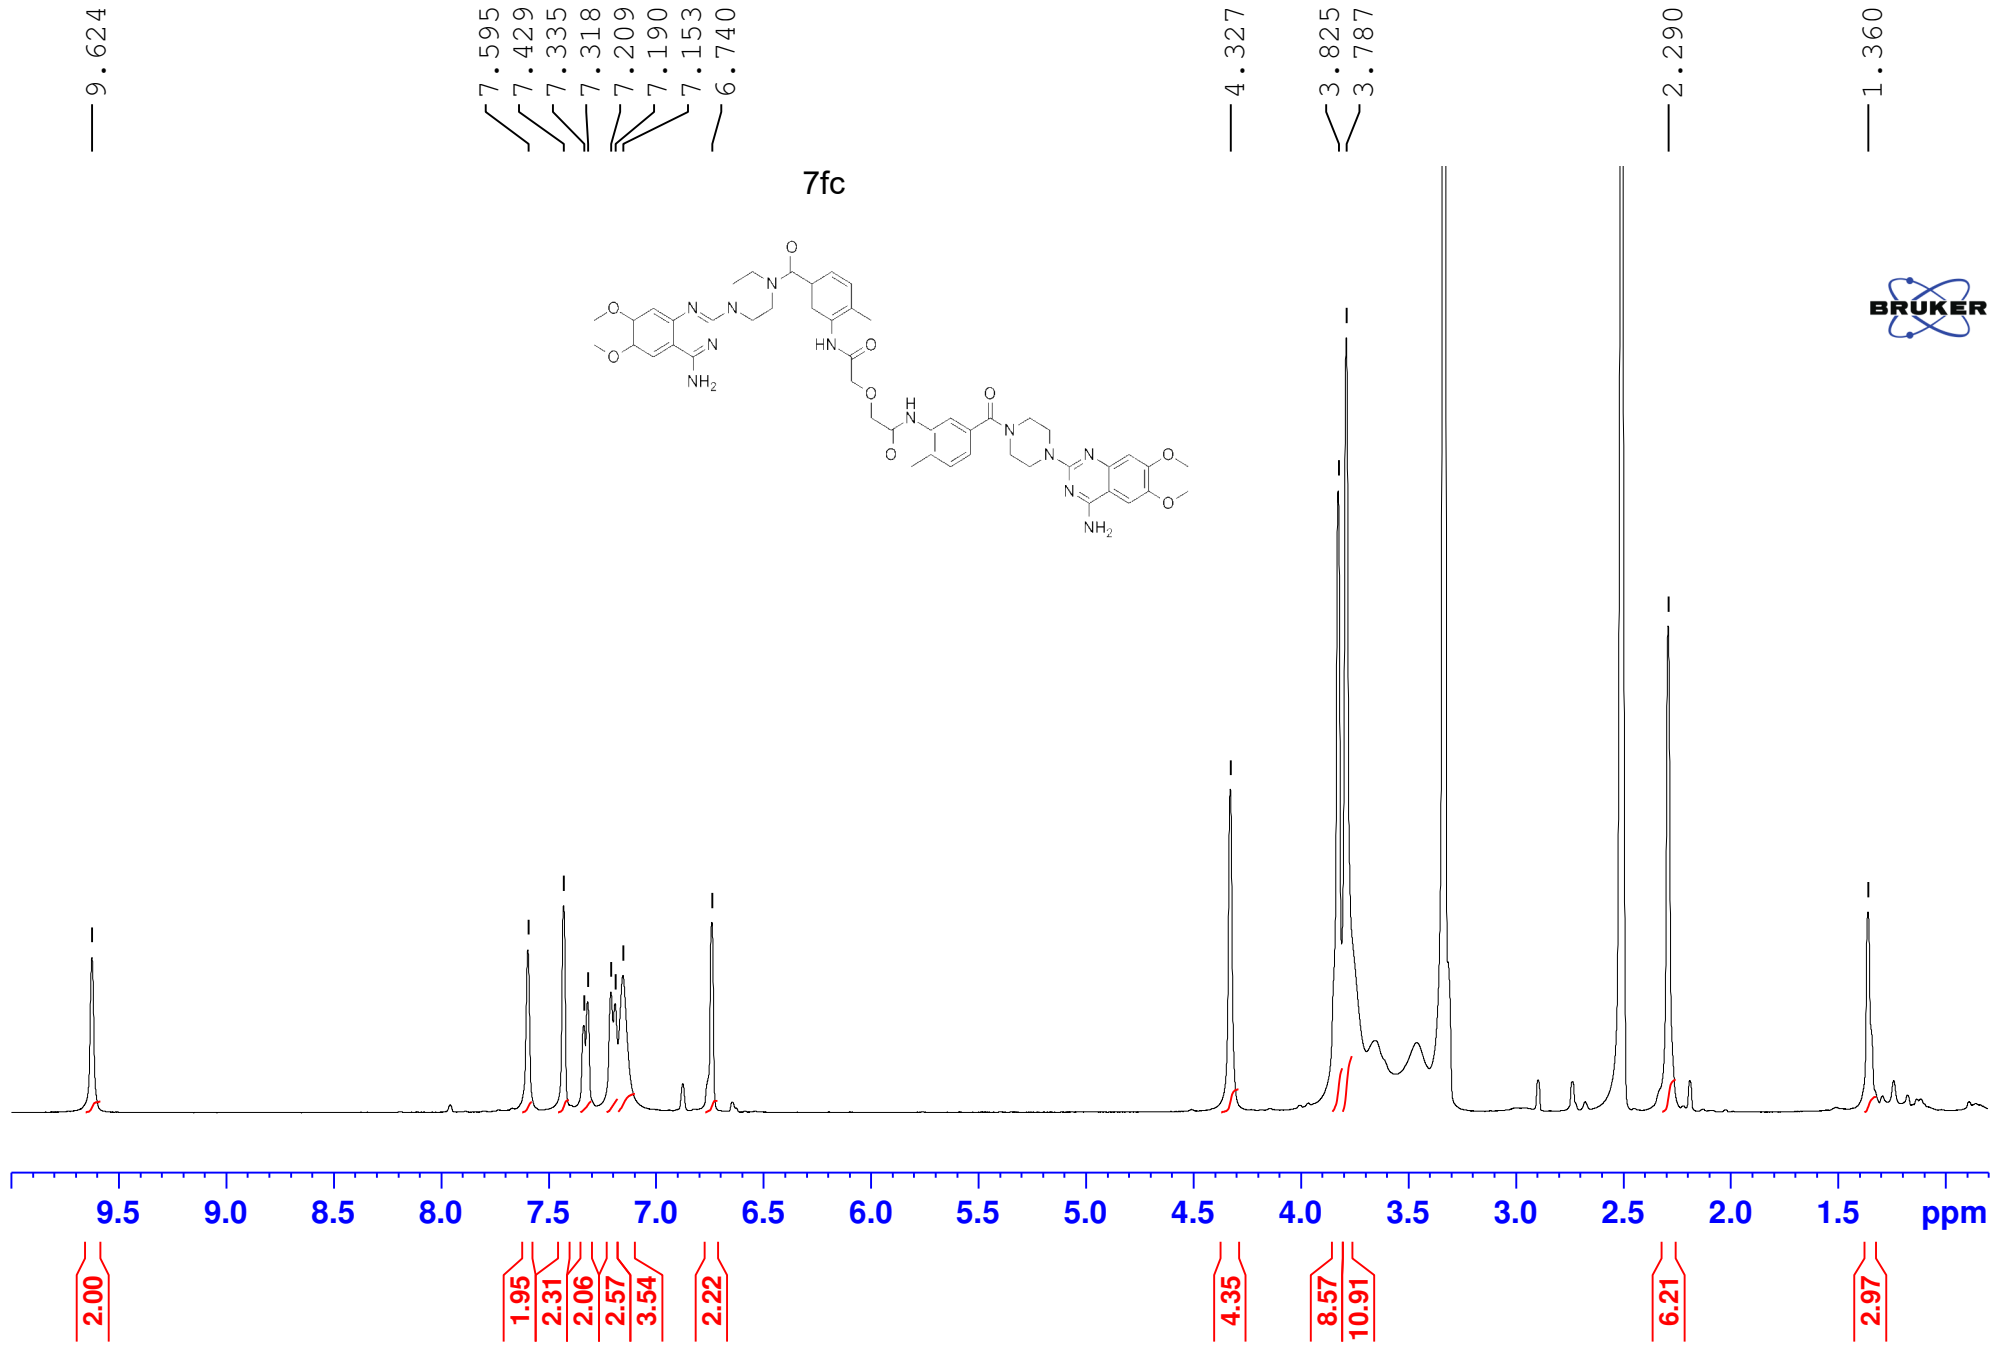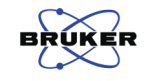

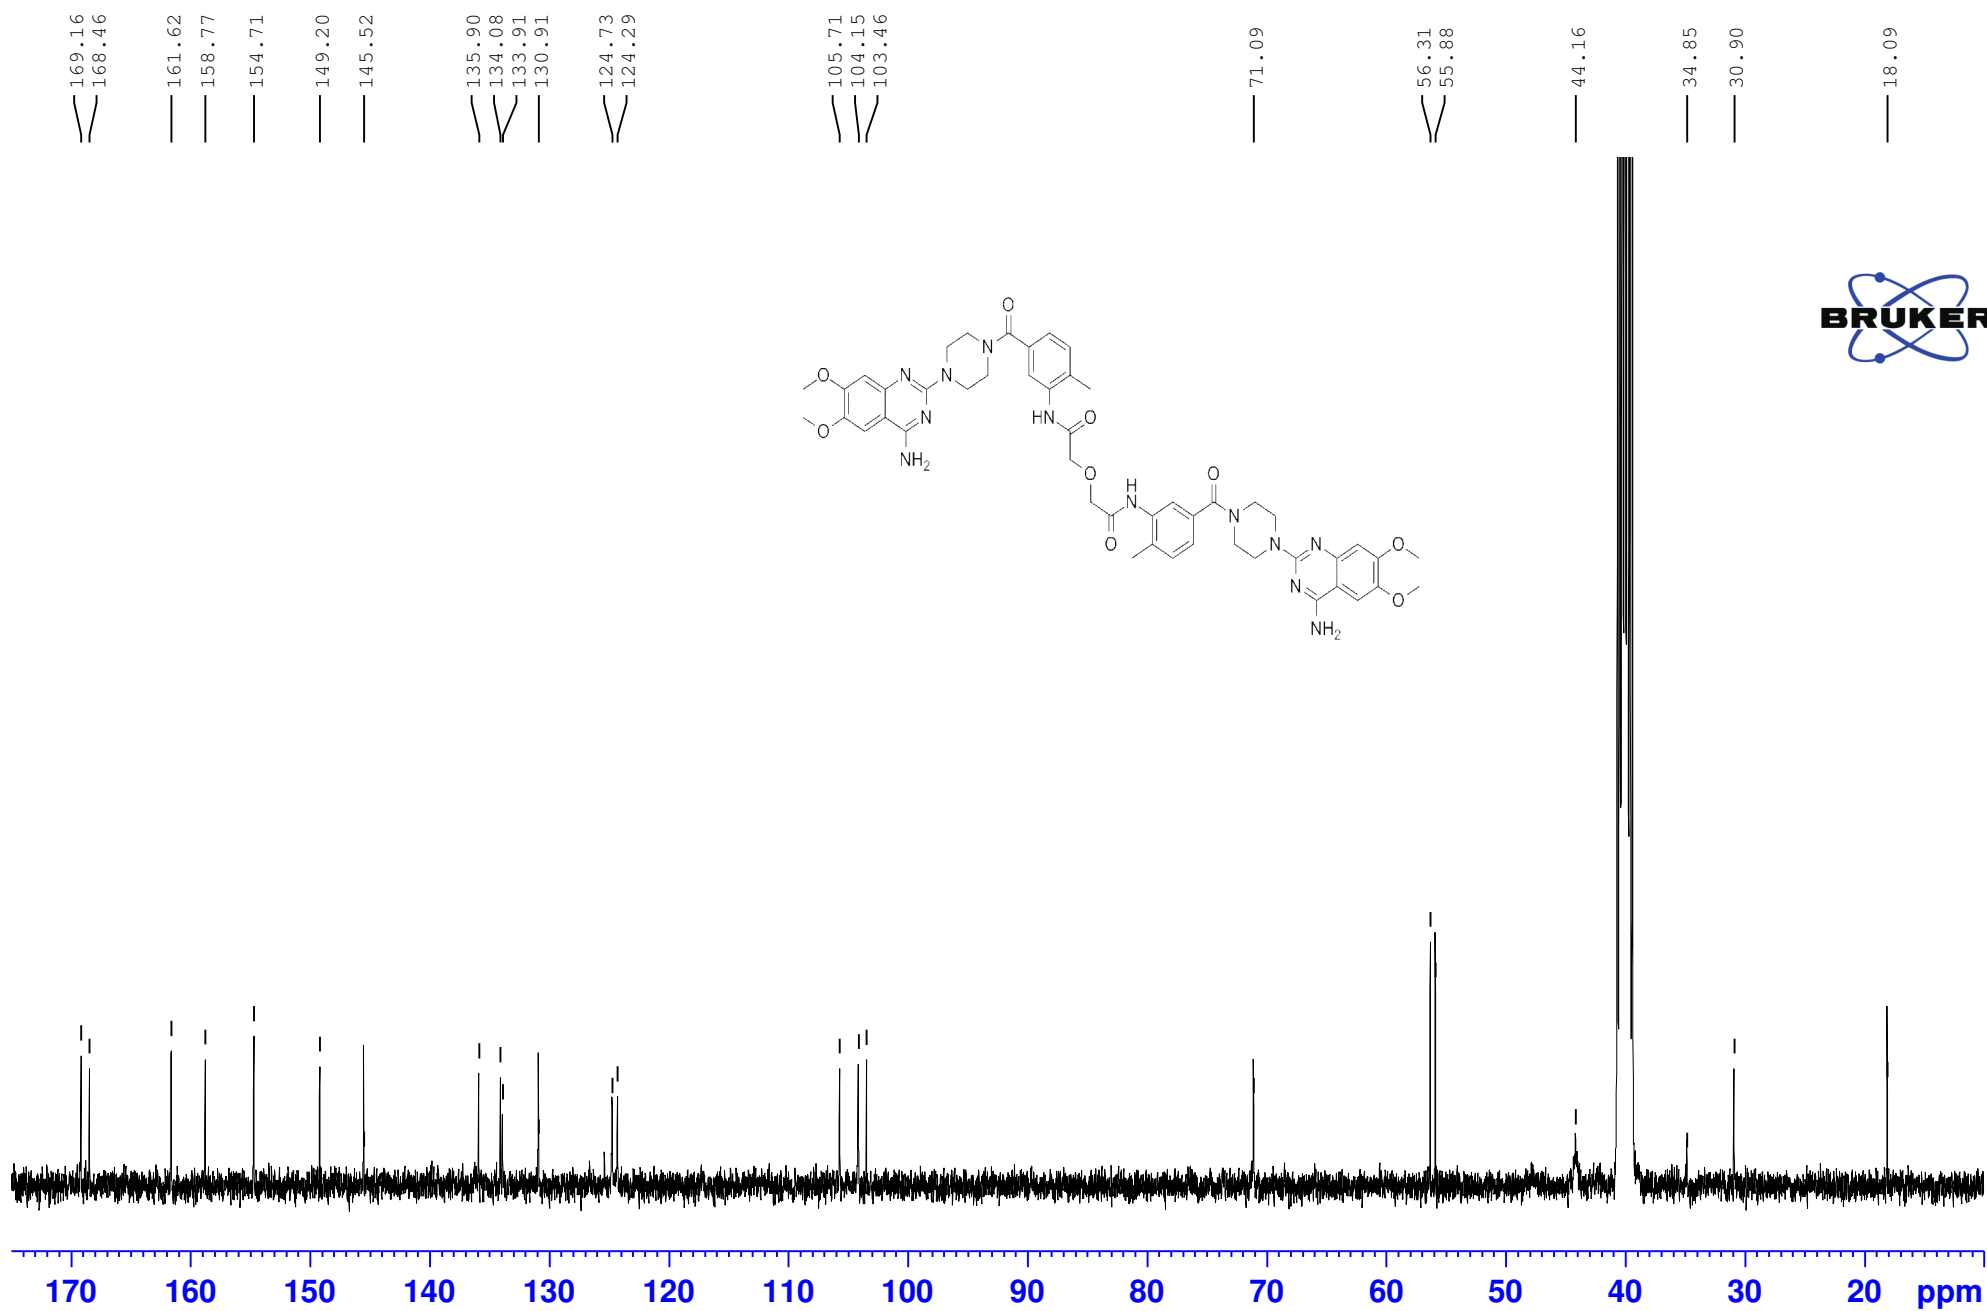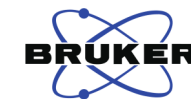

# ==== Shimadzu LabSolutions Data Report ====

Sample ID : 1 Acquired 1/4/2020 9:02:39 PM  
Data Filename : CF-F-28.lcd

<Chromatogram>

Segment#1

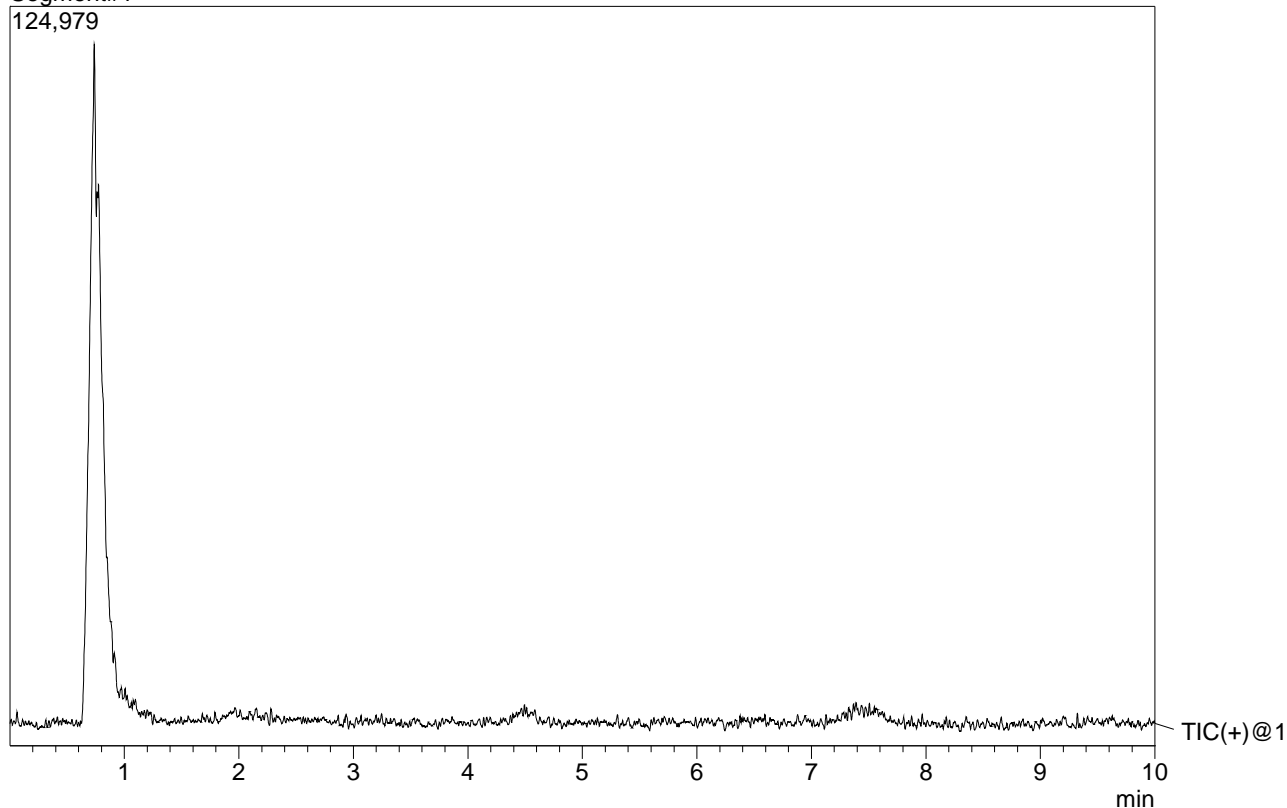

<Spectrum>

R.Time:----(Scan#:----)  
MassPeaks:501 BasePeak:943.20(19163)  
Spectrum Mode:Averaged 0.612-1.007(368-605)  
BG Mode:None Polarity:Positive Segment 1 - Event 1

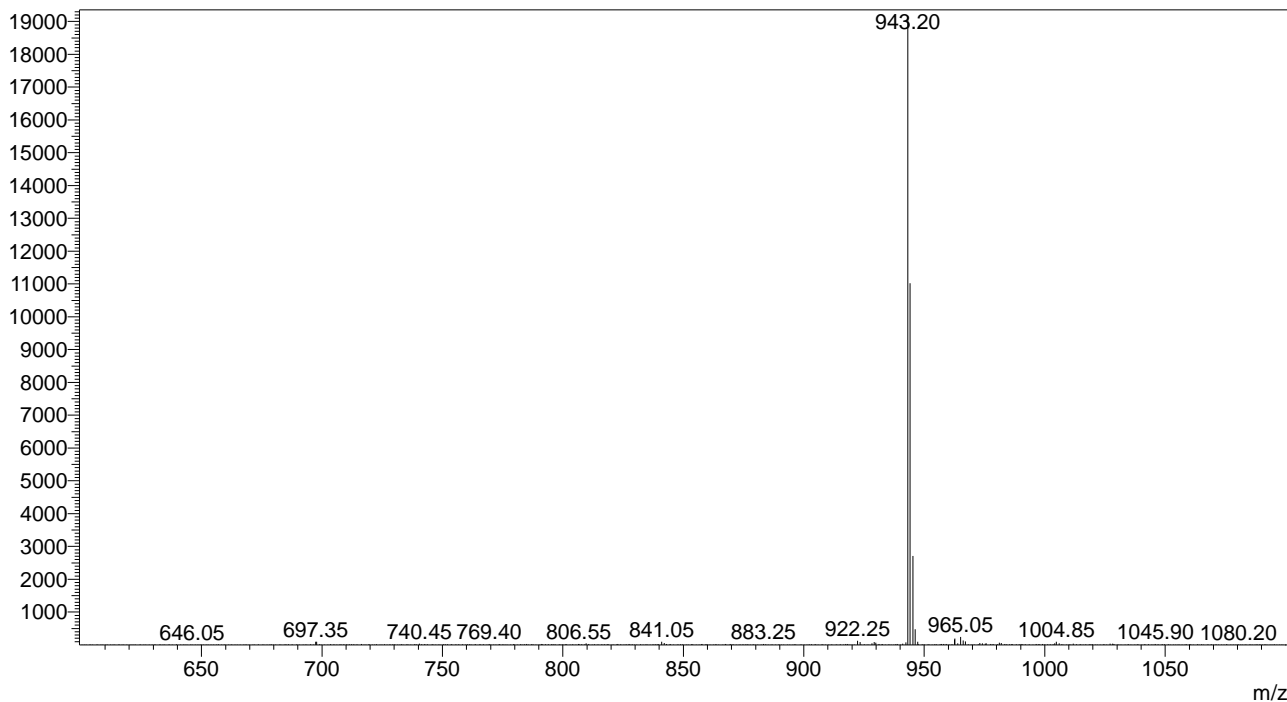

# Analysis Report

## <Sample Information>

|                  |                                    |              |                        |
|------------------|------------------------------------|--------------|------------------------|
| Sample Name      | : CF_28                            | Sample Type  | : Unknown              |
| Sample ID        | : CF_028                           |              |                        |
| Data Filename    | : CF_Batch_13_6_20_6182020_028.lcd |              |                        |
| Method Filename  | : PDA_6_18_20_batch.lcm            |              |                        |
| Batch Filename   | : CF_Batch_13_6_20.lcb             |              |                        |
| Vial #           | : 1-27                             |              |                        |
| Injection Volume | : 5 uL                             | Acquired by  | : System Administrator |
| Date Acquired    | : 6/18/2020 3:20:06 PM             | Processed by | : System Administrator |
| Date Processed   | : 6/18/2020 8:38:33 PM             |              |                        |

## <Chromatogram>

mAU

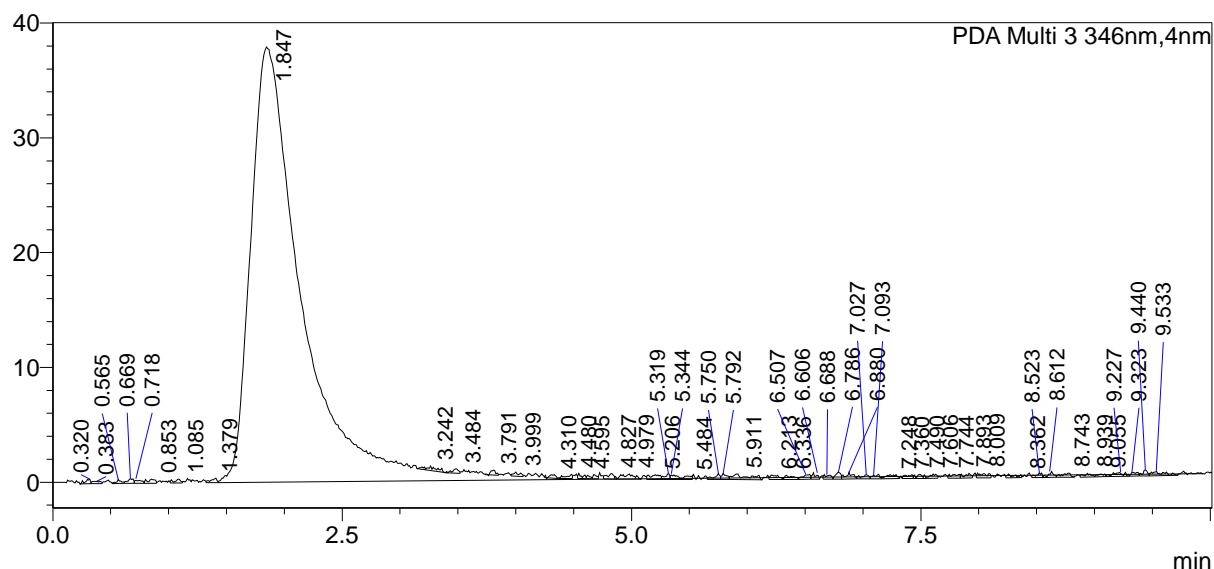

## <Peak Table>

PDA Ch3 346nm

| Peak# | Ret. Time | Area    | Height | Peak Purity Index    |
|-------|-----------|---------|--------|----------------------|
| 1     | 0.320     | 1216    | 391    | Cannot be calculated |
| 2     | 0.383     | 1051    | 243    | Cannot be calculated |
| 3     | 0.565     | 1031    | 340    | Cannot be calculated |
| 4     | 0.669     | 1443    | 409    | Cannot be calculated |
| 5     | 0.718     | 1037    | 242    | Cannot be calculated |
| 6     | 0.853     | 1530    | 357    | Cannot be calculated |
| 7     | 1.085     | 1242    | 341    | Cannot be calculated |
| 8     | 1.379     | 1383    | 257    | Cannot be calculated |
| 9     | 1.847     | 1111695 | 37903  | 0.994450             |
| 10    | 3.242     | 2338    | 193    | Cannot be calculated |
| 11    | 3.484     | 1372    | 381    | Cannot be calculated |
| 12    | 3.791     | 1381    | 376    | Cannot be calculated |
| 13    | 3.999     | 1379    | 359    | Cannot be calculated |
| 14    | 4.310     | 1106    | 304    | Cannot be calculated |
| 15    | 4.480     | 1415    | 373    | Cannot be calculated |
| 16    | 4.595     | 2470    | 316    | Cannot be calculated |
| 17    | 4.827     | 1807    | 465    | Cannot be calculated |
| 18    | 4.979     | 3281    | 461    | Cannot be calculated |
| 19    | 5.206     | 2370    | 421    | Cannot be calculated |
| 20    | 5.319     | 1451    | 499    | Cannot be calculated |
| 21    | 5.344     | 1483    | 394    | Cannot be calculated |

| Peak# | Ret. Time | Area    | Height | Peak Purity Index    |
|-------|-----------|---------|--------|----------------------|
| 22    | 5.484     | 1574    | 308    | Cannot be calculated |
| 23    | 5.750     | 1865    | 545    | Cannot be calculated |
| 24    | 5.792     | 1576    | 543    | Cannot be calculated |
| 25    | 5.911     | 4440    | 484    | Cannot be calculated |
| 26    | 6.213     | 1889    | 394    | Cannot be calculated |
| 27    | 6.336     | 1737    | 370    | Cannot be calculated |
| 28    | 6.507     | 1836    | 391    | Cannot be calculated |
| 29    | 6.606     | 1349    | 337    | Cannot be calculated |
| 30    | 6.688     | 1410    | 289    | Cannot be calculated |
| 31    | 6.786     | 1926    | 600    | Cannot be calculated |
| 32    | 6.880     | 2291    | 558    | Cannot be calculated |
| 33    | 7.027     | 1639    | 352    | Cannot be calculated |
| 34    | 7.093     | 1385    | 316    | Cannot be calculated |
| 35    | 7.248     | 2058    | 257    | Cannot be calculated |
| 36    | 7.360     | 1462    | 290    | Cannot be calculated |
| 37    | 7.490     | 1152    | 345    | Cannot be calculated |
| 38    | 7.606     | 1666    | 366    | Cannot be calculated |
| 39    | 7.744     | 1704    | 332    | Cannot be calculated |
| 40    | 7.893     | 1643    | 308    | Cannot be calculated |
| 41    | 8.009     | 2311    | 346    | Cannot be calculated |
| 42    | 8.362     | 1363    | 252    | Cannot be calculated |
| 43    | 8.523     | 1290    | 376    | Cannot be calculated |
| 44    | 8.612     | 1556    | 287    | Cannot be calculated |
| 45    | 8.743     | 1865    | 308    | Cannot be calculated |
| 46    | 8.939     | 1255    | 300    | Cannot be calculated |
| 47    | 9.055     | 1009    | 241    | Cannot be calculated |
| 48    | 9.227     | 2243    | 219    | Cannot be calculated |
| 49    | 9.323     | 1510    | 333    | Cannot be calculated |
| 50    | 9.440     | 1502    | 519    | Cannot be calculated |
| 51    | 9.533     | 2590    | 379    | Cannot be calculated |
| Total |           | 1196580 | 55974  |                      |
